# Supplementary material
Source: PubMed Central journal article supplement (PMC4599696)

# Asymmetric Redox-Annulation of Cyclic Amines

YoungKu Kang,<sup>†</sup> Weijie Chen,<sup>†</sup> Martin Breugst,<sup>‡,\*</sup> and Daniel Seidel<sup>†,\*</sup>

<sup>†</sup> *Department of Chemistry and Chemical Biology, Rutgers, The State University of New Jersey, Piscataway, New Jersey 08854, United States*

<sup>‡</sup> *Department für Chemie, Universität zu Köln, Greinstraße 4, 50931 Köln, Germany*

## Supporting Information

### Table of Contents

#### Part I: Computational Studies

|                                                                                                                        |      |
|------------------------------------------------------------------------------------------------------------------------|------|
| 1. Computational Details.....                                                                                          | S-2  |
| 2. Graphical Representations of the Calculated Transition States.....                                                  | S-3  |
| 3. Schematic Overview of All Calculated Pathways.....                                                                  | S-4  |
| 4. Coordinates and Calculated Energies for the Starting Materials.....                                                 | S-5  |
| 5. Coordinates and Calculated Energies for the Products.....                                                           | S-7  |
| 6. Coordinates and Calculated Energies for the Intermediates and Transition States of the<br>Uncatalyzed Reaction..... | S-11 |
| 7. Coordinates and Calculated Energies for the Intermediates and Transition States of the<br>Catalyzed Reaction.....   | S-17 |
| 8. References.....                                                                                                     | S-31 |

#### Part II: Experimental Part

|                                                                                                   |      |
|---------------------------------------------------------------------------------------------------|------|
| Additional Experiments Regarding the Regioselectivity of the Asymmetric Redox-<br>Annulation..... | S-32 |
| Crystal Structures for Compounds 6c, 7c and 8c.....                                               | S-33 |
| 2D-NMR Analysis.....                                                                              | S-36 |
| HPLC Profiles.....                                                                                | S-40 |
| Copies of NMR Spectra.....                                                                        | S-47 |

## Part I: Computational Studies

### 1 Computational Details

For the computational investigations, the conformational space for each structure was explored using the OPLS-2005 force field<sup>1</sup> and a modified Monte Carlo search algorithm implemented in MacroModel 10.6.<sup>2</sup> An energy cut-off of 20 kcal mol<sup>-1</sup> was employed for the conformational analysis, and structures with heavy-atom root-mean-square deviations (RMSD) less than 2 Å after the initial force field optimizations were considered to be the same conformer. The remaining structures were subsequently optimized with the dispersion-corrected M06-L functional<sup>3</sup> with Grimme's dispersion-correction D3<sup>4</sup> and the double- $\zeta$  basis set 6-31+G(d,p). Solvation by toluene was taken into account by using the integral equation formalism polarizable continuum model (IEFPCM)<sup>5</sup> for all calculations. Vibrational analysis verified that each structure was a minimum or transition state. Following the intrinsic reaction coordinates (IRC) confirmed that all transition states connected the corresponding reactants and products on the potential energy surface. Thermal corrections were obtained from unscaled harmonic vibrational frequencies at the same level of theory for a standard state of 1 mol L<sup>-1</sup> and 298.15 K. Entropic contributions to the reported free energies were derived from partition functions evaluated with the quasiharmonic approximation by Truhlar and coworkers.<sup>6</sup> Electronic energies were subsequently obtained from single point calculations of the M06-L-D3 geometries employing the meta-hybrid M06-2X functional,<sup>7</sup> Grimme's dispersion-correction D3 (zero-damping), the large quadruple- $\zeta$  basis set def2-QZVP,<sup>8</sup> and IEFPCM for toluene, a level expected to give accurate energies.<sup>9</sup> An ultrafine grid was used throughout this study for numerical integration of the density. All density functional theory calculations were performed with Gaussian 09.<sup>10</sup>

## 2 Graphical Representations of the Calculated Transition States

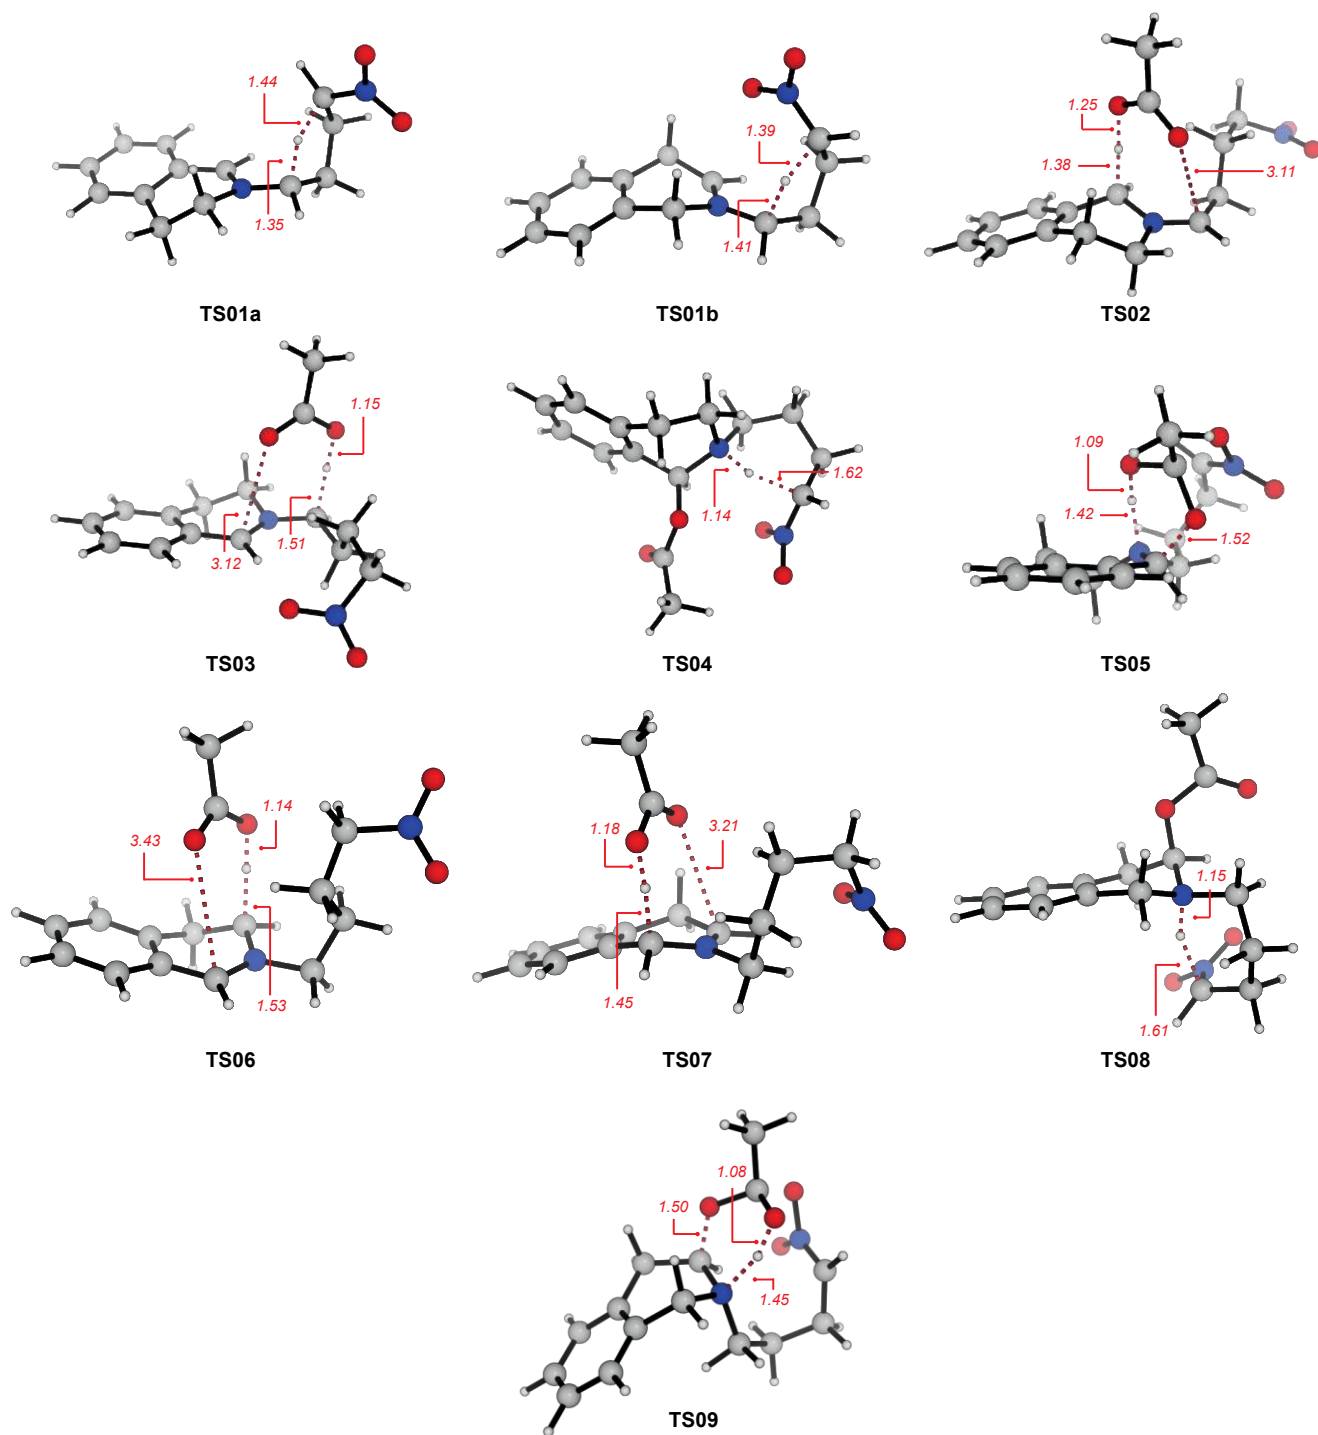

Figure S1. Graphical representation of the calculated transition states and selected bond lengths [in Å, M06-2X-D3/def2-QZVP/IEFPCM//M06-L-D3/6-31+G(d,p)/IEFPCM(toluene)].

### 3 Schematic Overview of All Calculated Pathways

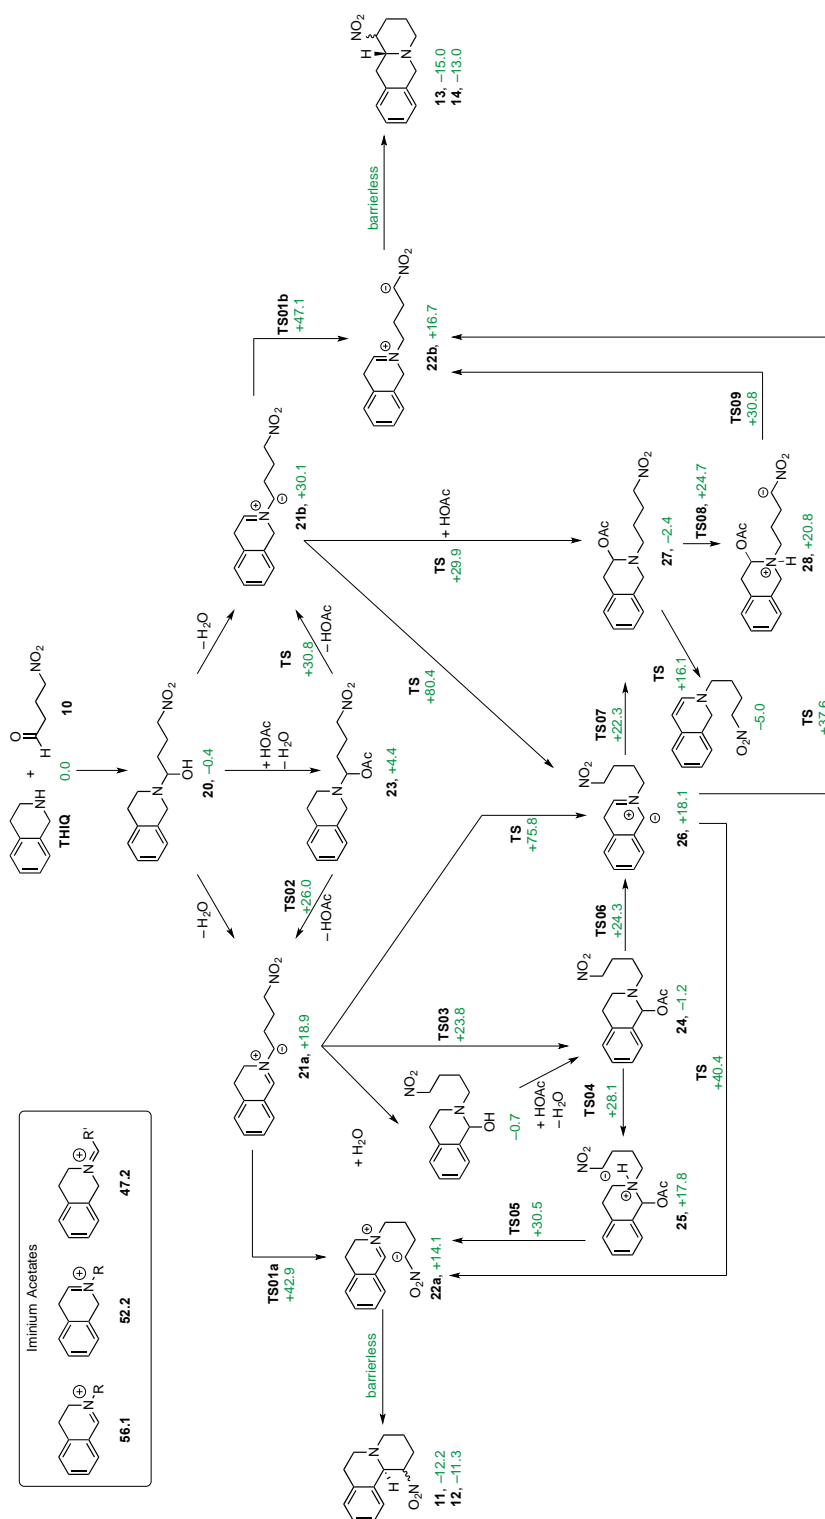

Scheme S1. Overview about the most important pathways analyzed in redox-annulation reactions [in kcal mol<sup>-1</sup>, M06-2X-D3/def2-QZVP/IEFPCM//M06-L-D3/6-31+G(d,p)/IEFPCM(toluene)].

## 4 Coordinates and Calculated Energies for the Starting Materials

### 4.1 Tetrahydroisoquinoline (THIQ)

|                                       |                     |
|---------------------------------------|---------------------|
| SCF energy:                           | -404.337930 hartree |
| Zero-point correction:                | +0.182575 hartree   |
| Enthalpy correction:                  | +0.191319 hartree   |
| Free energy correction:               | +0.150162 hartree   |
| Quasiharmonic free energy correction: | +0.150166 hartree   |

#### Cartesian Coordinates

|   |          |          |          |
|---|----------|----------|----------|
| C | 2.55286  | 0.70273  | -0.01907 |
| C | 1.34392  | 1.38973  | -0.04921 |
| C | 2.55265  | -0.69193 | 0.03042  |
| C | 1.34240  | -1.37702 | 0.04964  |
| C | 0.12243  | -0.69313 | 0.01502  |
| C | 0.12048  | 0.70943  | -0.03250 |
| C | -1.18055 | 1.46970  | -0.07593 |
| C | -2.36365 | 0.60521  | 0.34422  |
| H | -1.35088 | 1.83904  | -1.09829 |
| H | -1.11085 | 2.36684  | 0.55218  |
| N | -2.37113 | -0.70391 | -0.30565 |
| H | -3.31011 | 1.11343  | 0.13385  |
| H | -2.33417 | 0.42821  | 1.42763  |
| C | -1.17935 | -1.46179 | 0.05799  |
| H | 1.33654  | -2.46549 | 0.08810  |
| H | 3.49099  | 1.25071  | -0.03162 |
| H | 3.49052  | -1.24022 | 0.05166  |
| H | 1.33936  | 2.47809  | -0.08250 |
| H | -1.11566 | -2.34405 | -0.58873 |
| H | -1.32916 | -1.85194 | 1.07639  |
| H | -2.37579 | -0.56485 | -1.31253 |

### 4.2 4-Nitrobutyraldehyde (10)

|                                       |                     |
|---------------------------------------|---------------------|
| SCF energy:                           | -436.993135 hartree |
| Zero-point correction:                | +0.116927 hartree   |
| Enthalpy correction:                  | +0.126154 hartree   |
| Free energy correction:               | +0.082284 hartree   |
| Quasiharmonic free energy correction: | +0.084098 hartree   |

#### Cartesian Coordinates

|   |          |          |          |
|---|----------|----------|----------|
| C | 2.12003  | -0.43658 | 0.40151  |
| O | 2.39360  | -0.52788 | -0.77817 |
| C | 1.10587  | 0.51299  | 0.96554  |
| C | 0.32405  | 1.29776  | -0.07489 |
| H | 0.45258  | -0.05240 | 1.64442  |
| H | 1.65105  | 1.19565  | 1.63167  |
| C | -0.56473 | 0.43639  | -0.96032 |
| H | 1.01772  | 1.81742  | -0.74292 |
| H | -0.28779 | 2.06159  | 0.41379  |
| N | -1.55106 | -0.30391 | -0.09970 |
| H | 0.00174  | -0.32005 | -1.50118 |

|   |          |          |          |
|---|----------|----------|----------|
| H | -1.15616 | 1.04727  | -1.64237 |
| O | -1.29824 | -1.47582 | 0.17437  |
| O | -2.51729 | 0.32680  | 0.32265  |
| H | 2.64238  | -1.07033 | 1.15265  |

### 4.3 Acetic Acid

|                                       |                     |
|---------------------------------------|---------------------|
| SCF energy:                           | -229.112050 hartree |
| Zero-point correction:                | +0.061927 hartree   |
| Enthalpy correction:                  | +0.067449 hartree   |
| Free energy correction:               | +0.034631 hartree   |
| Quasiharmonic free energy correction: | +0.035068 hartree   |

#### Cartesian Coordinates

|   |          |          |          |
|---|----------|----------|----------|
| C | 1.38675  | -0.10636 | 0.00000  |
| C | -0.08862 | 0.12396  | 0.00000  |
| H | 1.67529  | -0.69006 | 0.87720  |
| H | 1.91410  | 0.84505  | 0.00013  |
| H | 1.67530  | -0.68981 | -0.87736 |
| O | -0.64631 | 1.20199  | 0.00000  |
| O | -0.77105 | -1.04548 | 0.00000  |
| H | -1.71464 | -0.82291 | -0.00001 |

### 4.4 Water

|                                       |                    |
|---------------------------------------|--------------------|
| SCF energy:                           | -76.439399 hartree |
| Zero-point correction:                | +0.021648 hartree  |
| Enthalpy correction:                  | +0.025428 hartree  |
| Free energy correction:               | +0.004006 hartree  |
| Quasiharmonic free energy correction: | +0.004006 hartree  |

#### Cartesian Coordinates

|   |         |          |          |
|---|---------|----------|----------|
| O | 0.00000 | 0.00000  | 0.11771  |
| H | 0.00000 | 0.76000  | -0.47085 |
| H | 0.00000 | -0.76000 | -0.47085 |

## 5 Coordinates and Calculated Energies for the Products

### 5.1 Product 11

|                                       |                     |
|---------------------------------------|---------------------|
| SCF energy:                           | -764.920237 hartree |
| Zero-point correction:                | +0.278524 hartree   |
| Enthalpy correction:                  | +0.292980 hartree   |
| Free energy correction:               | +0.238514 hartree   |
| Quasiharmonic free energy correction: | +0.239443 hartree   |

#### Cartesian Coordinates

|   |          |          |          |
|---|----------|----------|----------|
| C | 3.78740  | 0.10412  | -0.00288 |
| C | 3.09483  | -1.04408 | 0.36327  |
| C | 3.10008  | 1.16725  | -0.58735 |
| C | 1.72755  | 1.07254  | -0.78461 |
| C | 1.02015  | -0.07234 | -0.39767 |
| C | 1.71336  | -1.15228 | 0.16891  |
| C | 1.00331  | -2.43443 | 0.50500  |
| C | -0.50204 | -2.26542 | 0.56129  |
| H | 1.37555  | -2.83701 | 1.45406  |
| H | 1.24832  | -3.18092 | -0.26210 |
| N | -0.95036 | -1.51122 | -0.60744 |
| C | -0.47465 | -0.13557 | -0.60380 |
| H | 1.19483  | 1.89714  | -1.25324 |
| H | 4.85966  | 0.16766  | 0.15956  |
| H | 3.62992  | 2.06485  | -0.89175 |
| H | 3.62909  | -1.88308 | 0.80521  |
| C | -2.38610 | -1.59897 | -0.85721 |
| C | -3.22410 | -0.82312 | 0.15179  |
| C | -2.77069 | 0.62963  | 0.18450  |
| H | -3.12906 | -1.27410 | 1.14851  |
| H | -4.28433 | -0.87769 | -0.11492 |
| C | -1.27399 | 0.70107  | 0.45482  |
| H | -2.96803 | 1.10566  | -0.78388 |
| H | -3.31296 | 1.20255  | 0.94383  |
| N | -0.81669 | 2.12713  | 0.41108  |
| O | -1.10935 | 2.78133  | -0.59372 |
| O | -0.13987 | 2.54778  | 1.34782  |
| H | -2.66018 | -2.65894 | -0.87384 |
| H | -2.56949 | -1.20076 | -1.86501 |
| H | -0.79342 | -1.79050 | 1.51721  |
| H | -1.00078 | -3.23985 | 0.53855  |
| H | -0.72608 | 0.30578  | -1.58066 |
| H | -1.02049 | 0.36450  | 1.46374  |

### 5.2 Product 12

|                                       |                     |
|---------------------------------------|---------------------|
| SCF energy:                           | -764.918742 hartree |
| Zero-point correction:                | +0.278012 hartree   |
| Enthalpy correction:                  | +0.292426 hartree   |
| Free energy correction:               | +0.237739 hartree   |
| Quasiharmonic free energy correction: | +0.239291 hartree   |

### Cartesian Coordinates

|   |          |          |          |
|---|----------|----------|----------|
| C | -3.86543 | -0.53526 | -0.10945 |
| C | -3.23875 | 0.53901  | 0.51138  |
| C | -3.12590 | -1.37337 | -0.94437 |
| C | -1.77017 | -1.13359 | -1.13218 |
| C | -1.12835 | -0.07240 | -0.48618 |
| C | -1.87364 | 0.78504  | 0.33140  |
| C | -1.20142 | 1.96151  | 0.97650  |
| C | 0.00987  | 2.38836  | 0.17337  |
| H | -0.87731 | 1.70018  | 1.99280  |
| H | -1.90839 | 2.79270  | 1.07412  |
| N | 0.92284  | 1.26157  | 0.03519  |
| C | 0.34491  | 0.16111  | -0.73579 |
| H | -1.20114 | -1.78720 | -1.79152 |
| H | -4.92613 | -0.71171 | 0.04450  |
| H | -3.60426 | -2.20781 | -1.44896 |
| H | -3.81231 | 1.21001  | 1.14793  |
| C | 2.20076  | 1.65598  | -0.55282 |
| C | 3.21039  | 0.52438  | -0.46117 |
| C | 2.65328  | -0.77214 | -1.04034 |
| H | 3.47777  | 0.36801  | 0.58831  |
| H | 4.12821  | 0.80309  | -0.98836 |
| C | 1.25407  | -1.06069 | -0.53005 |
| H | 2.56602  | -0.68795 | -2.13140 |
| H | 3.31819  | -1.61428 | -0.83722 |
| N | 1.27620  | -1.45313 | 0.95508  |
| O | 0.19617  | -1.54620 | 1.52631  |
| O | 2.36457  | -1.68349 | 1.47524  |
| H | 2.56513  | 2.53648  | -0.01341 |
| H | 2.05952  | 1.95978  | -1.61255 |
| H | 0.55193  | 3.19272  | 0.68126  |
| H | -0.30421 | 2.78333  | -0.81453 |
| H | 0.44542  | 0.37883  | -1.82507 |
| H | 0.82465  | -1.94535 | -1.01204 |

### 5.3 Product 13

|                                       |                     |
|---------------------------------------|---------------------|
| SCF energy:                           | -764.923818 hartree |
| Zero-point correction:                | +0.277841 hartree   |
| Enthalpy correction:                  | +0.292579 hartree   |
| Free energy correction:               | +0.236619 hartree   |
| Quasiharmonic free energy correction: | +0.238482 hartree   |

### Cartesian Coordinates

|   |          |          |          |
|---|----------|----------|----------|
| C | -4.08136 | -1.28998 | -0.10942 |
| C | -2.73957 | -1.62967 | -0.24070 |
| C | -4.43888 | 0.03951  | 0.12057  |
| C | -3.44936 | 1.01135  | 0.21714  |
| C | -2.09839 | 0.67423  | 0.08534  |
| C | -1.73878 | -0.65658 | -0.14539 |
| C | -0.29489 | -1.02049 | -0.32161 |
| C | 0.67662  | 0.04789  | 0.17067  |
| H | -0.09710 | -1.20184 | -1.38814 |
| H | -0.08359 | -1.96842 | 0.18834  |
| N | 0.26008  | 1.36906  | -0.30764 |



|   |          |          |          |
|---|----------|----------|----------|
| C | -1.04443 | 1.72788  | 0.24589  |
| H | -3.72257 | 2.04967  | 0.39622  |
| H | -4.84633 | -2.05750 | -0.18462 |
| H | -5.48441 | 0.31608  | 0.22190  |
| H | -2.45491 | -2.66481 | -0.41906 |
| C | 1.21090  | 2.41704  | 0.06659  |
| C | 2.60037  | 2.15006  | -0.47299 |
| C | 3.10245  | 0.80604  | 0.03064  |
| H | 3.27821  | 2.94893  | -0.15829 |
| H | 2.57971  | 2.15864  | -1.56952 |
| C | 2.08424  | -0.24659 | -0.36351 |
| H | 4.08460  | 0.55885  | -0.38442 |
| H | 3.19598  | 0.81794  | 1.12338  |
| N | 2.51710  | -1.59959 | 0.15922  |
| O | 2.73048  | -2.48897 | -0.66119 |
| O | 2.62340  | -1.72304 | 1.37782  |
| H | 1.25828  | 2.51355  | 1.17256  |
| H | 0.81986  | 3.36654  | -0.31484 |
| H | 0.72852  | 0.03247  | 1.28036  |
| H | -1.36505 | 2.65990  | -0.23527 |
| H | -0.94194 | 1.96626  | 1.32740  |
| H | 2.04580  | -0.37060 | -1.44953 |

## 5.4 Product 14

|                                       |                     |
|---------------------------------------|---------------------|
| SCF energy:                           | -764.921521 hartree |
| Zero-point correction:                | +0.278430 hartree   |
| Enthalpy correction:                  | +0.292955 hartree   |
| Free energy correction:               | +0.237485 hartree   |
| Quasiharmonic free energy correction: | +0.239385 hartree   |

### Cartesian Coordinates

|   |          |          |          |
|---|----------|----------|----------|
| C | -3.74984 | -1.43092 | -0.74790 |
| C | -2.37045 | -1.60011 | -0.79429 |
| C | -4.28926 | -0.32844 | -0.08396 |
| C | -3.43952 | 0.58802  | 0.52598  |
| C | -2.05158 | 0.42224  | 0.48658  |
| C | -1.50782 | -0.68405 | -0.18156 |
| C | -0.01575 | -0.87753 | -0.27168 |
| C | 0.75830  | 0.06065  | 0.66229  |
| H | 0.29801  | -0.72757 | -1.31439 |
| H | 0.23896  | -1.91948 | -0.04098 |
| N | 0.22701  | 1.42771  | 0.68825  |
| C | -1.14178 | 1.40269  | 1.18861  |
| H | -3.85365 | 1.45249  | 1.04251  |
| H | -4.40236 | -2.15442 | -1.22836 |
| H | -5.36526 | -0.18320 | -0.04682 |
| H | -1.94576 | -2.45820 | -1.31219 |
| C | 0.35019  | 2.09973  | -0.60727 |
| C | 1.81820  | 2.23535  | -0.97294 |
| C | 2.50492  | 0.87337  | -0.99940 |
| H | 2.30723  | 2.88432  | -0.23592 |
| H | 1.92034  | 2.72050  | -1.94834 |
| C | 2.24978  | 0.16525  | 0.31402  |
| H | 2.11776  | 0.27037  | -1.82747 |

|   |          |          |          |
|---|----------|----------|----------|
| H | 3.58084  | 0.97304  | -1.16860 |
| N | 2.83123  | -1.23942 | 0.33031  |
| O | 3.24641  | -1.71912 | -0.72028 |
| O | 2.82010  | -1.82051 | 1.41380  |
| H | -0.11388 | 3.08666  | -0.50899 |
| H | -0.19756 | 1.57326  | -1.41381 |
| H | 0.68088  | -0.32344 | 1.68763  |
| H | -1.10041 | 1.15985  | 2.26067  |
| H | -1.55082 | 2.41752  | 1.12180  |
| H | 2.75350  | 0.66976  | 1.14430  |

## 6 Coordinates and Calculated Energies for the Intermediates and Transition States of the Uncatalyzed Reaction

### 6.1 Hemiaminal 20

|                                       |                     |
|---------------------------------------|---------------------|
| SCF energy:                           | -841.356794 hartree |
| Zero-point correction:                | +0.304126 hartree   |
| Enthalpy correction:                  | +0.321268 hartree   |
| Free energy correction:               | +0.258999 hartree   |
| Quasiharmonic free energy correction: | +0.262352 hartree   |

#### Cartesian Coordinates

|   |          |          |          |
|---|----------|----------|----------|
| C | 5.31126  | 0.61652  | 0.07469  |
| C | 4.17240  | 1.39502  | 0.25051  |
| C | 5.17993  | -0.74621 | -0.19592 |
| C | 3.91192  | -1.30981 | -0.28490 |
| C | 2.76253  | -0.53266 | -0.10602 |
| C | 2.89200  | 0.83685  | 0.16340  |
| C | 1.66451  | 1.68359  | 0.35997  |
| C | 0.41951  | 1.00020  | -0.17433 |
| H | 1.79701  | 2.65783  | -0.12535 |
| H | 1.52742  | 1.88858  | 1.43015  |
| N | 0.34893  | -0.35981 | 0.36311  |
| H | -0.47268 | 1.56074  | 0.12016  |
| H | 0.44107  | 0.98683  | -1.28102 |
| C | 1.40688  | -1.17102 | -0.23339 |
| H | 3.80422  | -2.37290 | -0.49380 |
| H | 6.29651  | 1.06895  | 0.14523  |
| H | 6.06168  | -1.36560 | -0.33431 |
| H | 4.26919  | 2.45958  | 0.45661  |
| H | 1.19465  | -1.36572 | -1.30318 |
| H | 1.40984  | -2.14968 | 0.26292  |
| C | -0.94543 | -0.99641 | 0.21519  |
| C | -1.97140 | -0.38391 | 1.16284  |
| H | -0.80010 | -2.04976 | 0.49058  |
| O | -1.40781 | -1.05991 | -1.13961 |
| C | -3.34797 | -1.04115 | 1.15244  |
| H | -2.07213 | 0.69244  | 0.97652  |
| H | -1.56000 | -0.46529 | 2.17365  |
| C | -4.19527 | -0.82911 | -0.09984 |
| H | -3.91834 | -0.68247 | 2.01553  |
| H | -3.25078 | -2.12656 | 1.27321  |
| N | -4.28486 | 0.64064  | -0.39780 |
| H | -5.21978 | -1.16666 | 0.05480  |
| H | -3.75203 | -1.29306 | -0.97918 |
| H | -1.79187 | -0.19964 | -1.36875 |
| O | -3.42636 | 1.12537  | -1.14287 |
| O | -5.16305 | 1.28768  | 0.16015  |

### 6.2 Azomethine Ylide 21a

|                        |                     |
|------------------------|---------------------|
| SCF energy:            | -764.863375 hartree |
| Zero-point correction: | +0.273552 hartree   |

Enthalpy correction: +0.290090 hartree  
Free energy correction: +0.228123 hartree  
Quasiharmonic free energy correction: +0.232133 hartree

### Cartesian Coordinates

|   |          |          |          |
|---|----------|----------|----------|
| C | -5.42968 | -0.84406 | 0.11887  |
| C | -4.83248 | 0.41060  | 0.26972  |
| C | -4.61910 | -1.96085 | -0.09877 |
| C | -3.23905 | -1.82747 | -0.17981 |
| C | -2.62478 | -0.56455 | -0.04022 |
| C | -3.45345 | 0.55948  | 0.20275  |
| C | -2.74931 | 1.86342  | 0.43371  |
| C | -1.50690 | 1.95787  | -0.42674 |
| H | -2.45785 | 1.95275  | 1.49055  |
| H | -3.40043 | 2.71590  | 0.21628  |
| N | -0.61004 | 0.79789  | -0.20183 |
| H | -1.77152 | 1.94874  | -1.49022 |
| H | -0.93105 | 2.86151  | -0.22165 |
| C | -1.20532 | -0.41833 | -0.10305 |
| H | -2.61607 | -2.70141 | -0.35874 |
| H | -6.50909 | -0.94762 | 0.17357  |
| H | -5.06904 | -2.94373 | -0.21316 |
| H | -5.44963 | 1.28863  | 0.45409  |
| C | 0.70591  | 1.02973  | -0.21177 |
| C | 1.66043  | -0.09010 | -0.08832 |
| C | 3.10760  | 0.38564  | -0.06054 |
| H | 1.51935  | -0.81382 | -0.91442 |
| H | 1.43449  | -0.67537 | 0.82327  |
| C | 4.05072  | -0.78112 | 0.07871  |
| H | 3.25839  | 1.08339  | 0.76943  |
| H | 3.33931  | 0.93977  | -0.97588 |
| N | 5.50547  | -0.38120 | 0.10157  |
| H | 3.97541  | -1.49614 | -0.74535 |
| H | 3.90571  | -1.34346 | 1.00531  |
| O | 6.31874  | -1.29420 | 0.21769  |
| O | 5.78719  | 0.80898  | 0.00465  |
| H | -0.55297 | -1.28195 | -0.11333 |
| H | 1.02199  | 2.05621  | -0.34405 |

### 6.3 Azomethine Ylide 21b

SCF energy: -764.845286 hartree  
Zero-point correction: +0.273004 hartree  
Enthalpy correction: +0.289574 hartree  
Free energy correction: +0.227165 hartree  
Quasiharmonic free energy correction: +0.231872 hartree

### Cartesian Coordinates

|   |         |          |          |
|---|---------|----------|----------|
| C | 4.85666 | 0.75582  | -1.00661 |
| C | 3.88386 | 1.46238  | -0.29980 |
| C | 4.77591 | -0.63198 | -1.11074 |
| C | 3.72023 | -1.31306 | -0.50647 |
| C | 2.75332 | -0.60660 | 0.20753  |

|   |          |          |          |
|---|----------|----------|----------|
| C | 2.83060  | 0.78651  | 0.31416  |
| C | 1.72808  | 1.46210  | 1.07972  |
| C | 0.42089  | 0.77977  | 0.84807  |
| H | 1.64326  | 2.51170  | 0.78027  |
| H | 2.00772  | 1.49212  | 2.15212  |
| N | 0.34632  | -0.56270 | 0.79390  |
| C | 1.63270  | -1.29207 | 0.92378  |
| H | 3.64676  | -2.39521 | -0.59079 |
| H | 5.67362  | 1.29001  | -1.48352 |
| H | 5.52803  | -1.18254 | -1.66810 |
| H | 3.94035  | 2.54640  | -0.22703 |
| C | -0.75854 | -1.32635 | 0.68924  |
| C | -2.08613 | -0.68535 | 0.58268  |
| C | -2.34621 | -0.03037 | -0.78620 |
| H | -2.19843 | 0.08565  | 1.36827  |
| H | -2.86450 | -1.43072 | 0.77775  |
| C | -3.51595 | 0.92642  | -0.77863 |
| H | -2.50388 | -0.80306 | -1.54361 |
| H | -1.46734 | 0.54535  | -1.10048 |
| N | -4.80417 | 0.23173  | -0.40286 |
| H | -3.71203 | 1.34707  | -1.76852 |
| H | -3.40694 | 1.73934  | -0.05873 |
| O | -5.54576 | 0.79634  | 0.39780  |
| O | -5.03737 | -0.84988 | -0.93723 |
| H | -0.60148 | -2.39117 | 0.59703  |
| H | -0.51083 | 1.32871  | 0.84550  |
| H | 1.47895  | -2.30882 | 0.55817  |
| H | 1.84431  | -1.35316 | 1.99940  |

## 6.4 Transition State TS01a

|                                       |                          |
|---------------------------------------|--------------------------|
| SCF energy:                           | -764.823102 hartree      |
| Zero-point correction:                | +0.270371 hartree        |
| Enthalpy correction:                  | +0.285674 hartree        |
| Free energy correction:               | +0.227573 hartree        |
| Quasiharmonic free energy correction: | +0.230006 hartree        |
| Imaginary Frequency:                  | 1375.3 $\text{icm}^{-1}$ |

### Cartesian Coordinates

|   |          |          |          |
|---|----------|----------|----------|
| C | -4.76847 | -0.62787 | -0.64088 |
| C | -4.15099 | 0.62105  | -0.53901 |
| C | -4.06138 | -1.78626 | -0.31229 |
| C | -2.74031 | -1.69922 | 0.10522  |
| C | -2.10567 | -0.44639 | 0.19216  |
| C | -2.83011 | 0.72554  | -0.12295 |
| C | -2.12558 | 2.03194  | 0.08917  |
| C | -0.64605 | 1.90815  | -0.20717 |
| H | -2.26085 | 2.35555  | 1.13103  |
| H | -2.55068 | 2.82112  | -0.53722 |
| N | -0.03782 | 0.77516  | 0.52683  |
| H | -0.09767 | 2.80881  | 0.07225  |
| H | -0.46882 | 1.72524  | -1.27448 |
| C | -0.74509 | -0.34457 | 0.62818  |
| H | -2.18226 | -2.59767 | 0.35720  |

|   |          |          |          |
|---|----------|----------|----------|
| H | -5.80018 | -0.69542 | -0.97221 |
| H | -4.54212 | -2.75694 | -0.38578 |
| H | -4.70678 | 1.52425  | -0.78032 |
| C | 1.33415  | 0.87965  | 0.79212  |
| C | 1.96718  | -0.16252 | 1.68432  |
| C | 2.47698  | -1.31834 | 0.78607  |
| H | 1.29012  | -0.50859 | 2.47524  |
| H | 2.82418  | 0.30445  | 2.17470  |
| C | 2.76778  | -0.75423 | -0.58112 |
| H | 1.71535  | -2.09936 | 0.67490  |
| H | 3.35904  | -1.78900 | 1.22991  |
| N | 4.05307  | -0.21350 | -0.78399 |
| H | 1.97561  | 0.41303  | -0.29812 |
| H | 2.41961  | -1.26770 | -1.47243 |
| O | 4.46668  | -0.05042 | -1.95449 |
| O | 4.69802  | 0.16980  | 0.22234  |
| H | -0.24200 | -1.20471 | 1.05581  |
| H | 1.60842  | 1.91873  | 0.96397  |

## 6.5 Transition State TS01b

|                                       |                          |
|---------------------------------------|--------------------------|
| SCF energy:                           | -764.816277 hartree      |
| Zero-point correction:                | +0.269856 hartree        |
| Enthalpy correction:                  | +0.285111 hartree        |
| Free energy correction:               | +0.227399 hartree        |
| Quasiharmonic free energy correction: | +0.229949 hartree        |
| Imaginary Frequency:                  | 1366.9 $\text{icm}^{-1}$ |

### Cartesian Coordinates

|   |          |          |          |
|---|----------|----------|----------|
| C | 4.57022  | -0.50321 | -0.34104 |
| C | 3.44355  | -0.71550 | -1.13262 |
| C | 4.43784  | 0.06669  | 0.92457  |
| C | 3.17713  | 0.42279  | 1.39761  |
| C | 2.04721  | 0.19639  | 0.61187  |
| C | 2.17775  | -0.37572 | -0.65697 |
| C | 0.92436  | -0.56736 | -1.46085 |
| C | -0.08279 | 0.47899  | -1.17128 |
| H | 0.45151  | -1.53768 | -1.21694 |
| H | 1.13371  | -0.59877 | -2.53317 |
| N | -0.23794 | 0.96779  | 0.03313  |
| C | 0.67214  | 0.51160  | 1.10826  |
| H | 3.06887  | 0.87554  | 2.38051  |
| H | 5.55269  | -0.77523 | -0.71540 |
| H | 5.31566  | 0.24087  | 1.53941  |
| H | 3.54496  | -1.14907 | -2.12473 |
| C | -1.36960 | 1.68510  | 0.48880  |
| C | -2.38968 | 2.07660  | -0.54168 |
| C | -3.27265 | 0.82782  | -0.82741 |
| H | -1.96711 | 2.50298  | -1.46077 |
| H | -3.00513 | 2.86562  | -0.09827 |
| C | -3.33241 | 0.00535  | 0.43925  |
| H | -2.83669 | 0.21244  | -1.62046 |
| H | -4.26965 | 1.13004  | -1.16188 |
| N | -2.92444 | -1.34264 | 0.38452  |

|   |          |          |          |
|---|----------|----------|----------|
| H | -4.21322 | 0.09283  | 1.06962  |
| H | -2.24000 | 0.69266  | 0.97563  |
| O | -2.03256 | -1.68892 | -0.43737 |
| O | -3.39437 | -2.14841 | 1.22090  |
| H | -1.08287 | 2.41679  | 1.24268  |
| H | -0.79568 | 0.78389  | -1.92617 |
| H | 0.19592  | -0.37523 | 1.54967  |
| H | 0.68069  | 1.28759  | 1.87749  |

## 6.6 Zwitterion 22a

|                                       |                     |
|---------------------------------------|---------------------|
| SCF energy:                           | -764.874916 hartree |
| Zero-point correction:                | +0.275710 hartree   |
| Enthalpy correction:                  | +0.291015 hartree   |
| Free energy correction:               | +0.234745 hartree   |
| Quasiharmonic free energy correction: | +0.235936 hartree   |

### Cartesian Coordinates

|   |          |          |          |
|---|----------|----------|----------|
| C | 3.99802  | 0.07944  | -0.23090 |
| C | 3.01598  | -0.34612 | -1.12754 |
| C | 3.67424  | 0.34424  | 1.10020  |
| C | 2.36605  | 0.17717  | 1.53547  |
| C | 1.38160  | -0.26106 | 0.64065  |
| C | 1.70304  | -0.51764 | -0.70661 |
| C | 0.57796  | -0.87862 | -1.62935 |
| C | -0.46777 | -1.71860 | -0.92256 |
| H | 0.94170  | -1.42239 | -2.50586 |
| H | 0.12417  | 0.05776  | -1.98440 |
| N | -0.85086 | -1.13436 | 0.37380  |
| C | 0.02802  | -0.46470 | 1.09408  |
| H | 2.09329  | 0.39002  | 2.56589  |
| H | 5.01946  | 0.21116  | -0.57593 |
| H | 4.43875  | 0.68480  | 1.79127  |
| H | 3.27246  | -0.53321 | -2.16739 |
| C | -2.14813 | -1.51382 | 0.93669  |
| C | -3.34539 | -0.93109 | 0.20167  |
| C | -3.33450 | 0.60089  | 0.14264  |
| H | -4.24331 | -1.29158 | 0.71884  |
| H | -3.39963 | -1.34205 | -0.81489 |
| C | -2.28636 | 1.15364  | -0.75179 |
| H | -3.20393 | 1.00714  | 1.15126  |
| H | -4.31916 | 0.92990  | -0.21370 |
| N | -1.14574 | 1.68484  | -0.30573 |
| O | -0.27728 | 2.17049  | -1.10551 |
| O | -0.87864 | 1.63853  | 0.96829  |
| H | -2.14919 | -1.18150 | 1.97903  |
| H | -2.19887 | -2.61039 | 0.93484  |
| H | -2.42388 | 1.22890  | -1.82478 |
| H | -0.23601 | -0.25273 | 2.12232  |
| H | -0.09614 | -2.73523 | -0.72396 |
| H | -1.37277 | -1.80855 | -1.52723 |

## 6.7 Zwitterion 22b

|                                       |                     |
|---------------------------------------|---------------------|
| SCF energy:                           | -764.869977 hartree |
| Zero-point correction:                | +0.275010 hartree   |
| Enthalpy correction:                  | +0.290413 hartree   |
| Free energy correction:               | +0.233802 hartree   |
| Quasiharmonic free energy correction: | +0.235158 hartree   |

### Cartesian Coordinates

|   |          |          |          |
|---|----------|----------|----------|
| C | -4.33364 | 0.30762  | -0.20448 |
| C | -3.23639 | 0.97472  | -0.74425 |
| C | -4.14138 | -0.80303 | 0.61640  |
| C | -2.85034 | -1.24444 | 0.89573  |
| C | -1.75043 | -0.56889 | 0.36719  |
| C | -1.94086 | 0.54626  | -0.45481 |
| C | -0.72148 | 1.24038  | -0.99022 |
| C | 0.39314  | 0.28829  | -1.23034 |
| H | -0.34119 | 1.96560  | -0.25191 |
| H | -0.93213 | 1.79985  | -1.90486 |
| N | 0.54641  | -0.77022 | -0.48398 |
| C | -0.34494 | -0.98205 | 0.68002  |
| H | -2.69471 | -2.11497 | 1.52908  |
| H | -5.33910 | 0.65087  | -0.42967 |
| H | -4.99542 | -1.32947 | 1.03192  |
| H | -3.38342 | 1.83710  | -1.39020 |
| C | 1.61116  | -1.76179 | -0.76139 |
| C | 2.98060  | -1.14952 | -1.00759 |
| C | 3.64482  | -0.58496 | 0.26035  |
| H | 2.90587  | -0.36678 | -1.76750 |
| H | 3.61589  | -1.93203 | -1.43779 |
| C | 2.73171  | 0.13297  | 1.18712  |
| H | 4.48190  | 0.05141  | -0.05847 |
| H | 4.08848  | -1.41267 | 0.82589  |
| N | 2.01527  | 1.18314  | 0.79468  |
| O | 2.14883  | 1.61507  | -0.42491 |
| O | 1.11248  | 1.70636  | 1.54285  |
| H | 1.01751  | 0.36903  | -2.11114 |
| H | 0.05718  | -0.38413 | 1.50988  |
| H | -0.28776 | -2.03888 | 0.94998  |
| H | 1.29018  | -2.35447 | -1.62578 |
| H | 1.64038  | -2.42850 | 0.10480  |
| H | 2.60217  | -0.14712 | 2.22501  |



## 7 Coordinates and Calculated Energies for the Intermediates and Transition States of the Catalyzed Reaction

### 7.1 Acetylated Hemiaminal 23

|                                       |                     |
|---------------------------------------|---------------------|
| SCF energy:                           | -994.023095 hartree |
| Zero-point correction:                | +0.340494 hartree   |
| Enthalpy correction:                  | +0.361408 hartree   |
| Free energy correction:               | +0.288510 hartree   |
| Quasiharmonic free energy correction: | +0.294750 hartree   |

#### Cartesian Coordinates

|   |          |          |          |
|---|----------|----------|----------|
| C | 5.19952  | -1.50014 | 0.09796  |
| C | 4.45873  | -0.74629 | 1.00130  |
| C | 4.60089  | -1.95298 | -1.07846 |
| C | 3.27014  | -1.64290 | -1.33454 |
| C | 2.52223  | -0.88060 | -0.43144 |
| C | 3.11868  | -0.42688 | 0.75337  |
| C | 2.32991  | 0.39609  | 1.73577  |
| C | 0.83578  | 0.26977  | 1.50590  |
| H | 2.61486  | 1.45240  | 1.64177  |
| H | 2.58022  | 0.10034  | 2.76096  |
| N | 0.56274  | 0.50038  | 0.08793  |
| H | 0.28940  | 1.01612  | 2.08965  |
| H | 0.48368  | -0.72950 | 1.82647  |
| C | 1.07837  | -0.58304 | -0.73542 |
| H | 2.79779  | -1.99216 | -2.25109 |
| H | 6.23815  | -1.73735 | 0.31026  |
| H | 5.16924  | -2.54253 | -1.79207 |
| H | 4.92029  | -0.39605 | 1.92269  |
| H | 0.96829  | -0.29756 | -1.79072 |
| H | 0.48711  | -1.51436 | -0.60853 |
| C | -0.80626 | 0.83106  | -0.22488 |
| C | -1.87677 | -0.06435 | 0.37658  |
| H | -0.89625 | 0.81730  | -1.32166 |
| O | -1.09869 | 2.15788  | 0.26775  |
| C | -3.26964 | 0.26724  | -0.13905 |
| H | -1.84729 | 0.02809  | 1.46907  |
| H | -1.61981 | -1.10312 | 0.13296  |
| C | -4.34588 | -0.62817 | 0.41855  |
| H | -3.29096 | 0.22057  | -1.23342 |
| H | -3.52754 | 1.29467  | 0.13843  |
| N | -4.21281 | -2.06860 | -0.03342 |
| H | -5.34607 | -0.34022 | 0.08322  |
| H | -4.35945 | -0.67694 | 1.50891  |
| C | -0.56007 | 3.25937  | -0.32588 |
| O | -4.76790 | -2.91669 | 0.65820  |
| O | -3.58966 | -2.29760 | -1.06631 |
| C | 0.16880  | 3.08204  | -1.62342 |
| H | 0.55365  | 4.04762  | -1.94492 |
| H | -0.50319 | 2.69503  | -2.39574 |
| H | 0.98994  | 2.36964  | -1.51215 |
| O | -0.73102 | 4.32942  | 0.21614  |

## 7.2 Transition State TS02

|                                       |                          |
|---------------------------------------|--------------------------|
| SCF energy:                           | -993.980516 hartree      |
| Zero-point correction:                | +0.333549 hartree        |
| Enthalpy correction:                  | +0.355139 hartree        |
| Free energy correction:               | +0.280771 hartree        |
| Quasiharmonic free energy correction: | +0.286603 hartree        |
| Imaginary Frequency:                  | 1295.2 $\text{icm}^{-1}$ |

### Cartesian Coordinates

|   |          |          |          |
|---|----------|----------|----------|
| C | -4.98555 | -1.31784 | -0.69737 |
| C | -4.54094 | -0.38616 | 0.24231  |
| C | -4.05708 | -2.05487 | -1.43150 |
| C | -2.69171 | -1.87156 | -1.22276 |
| C | -2.24049 | -0.93971 | -0.28191 |
| C | -3.17914 | -0.18367 | 0.44252  |
| C | -2.60076 | 0.81298  | 1.39922  |
| C | -1.43952 | 0.20014  | 2.15786  |
| H | -3.34435 | 1.16354  | 2.12057  |
| H | -2.23305 | 1.69618  | 0.86018  |
| N | -0.40989 | -0.35208 | 1.24047  |
| H | -1.78480 | -0.63663 | 2.77537  |
| H | -0.94194 | 0.93202  | 2.79576  |
| C | -0.81209 | -0.63073 | -0.09897 |
| H | -1.96901 | -2.45349 | -1.79099 |
| H | -6.04976 | -1.46692 | -0.85452 |
| H | -4.39677 | -2.78220 | -2.16366 |
| H | -5.25805 | 0.19676  | 0.81702  |
| H | -0.57078 | 0.55384  | -0.76289 |
| H | -0.12932 | -1.34061 | -0.57056 |
| C | 0.81400  | -0.43294 | 1.67880  |
| C | 1.93584  | -0.97754 | 0.88092  |
| H | 0.98911  | -0.03517 | 2.67325  |
| O | 0.26790  | 2.42471  | 0.59088  |
| C | 2.49154  | 0.03621  | -0.13171 |
| H | 1.60953  | -1.88200 | 0.34696  |
| H | 2.73218  | -1.27824 | 1.56789  |
| C | 3.55953  | -0.54893 | -1.01822 |
| H | 2.87429  | 0.91462  | 0.39365  |
| H | 1.68870  | 0.39470  | -0.78459 |
| N | 4.81178  | -0.95118 | -0.26670 |
| H | 3.91663  | 0.17110  | -1.75948 |
| H | 3.25026  | -1.45068 | -1.55056 |
| C | 0.01996  | 2.56441  | -0.61418 |
| O | 5.54119  | -1.77365 | -0.81250 |
| O | 5.03410  | -0.41902 | 0.81690  |
| C | 0.14351  | 3.90348  | -1.29955 |
| H | 0.80748  | 3.82800  | -2.16458 |
| H | 0.52104  | 4.65967  | -0.61130 |
| H | -0.83206 | 4.21583  | -1.68191 |
| O | -0.36759 | 1.60334  | -1.40837 |

### 7.3 Transition State 03

|                                       |                         |
|---------------------------------------|-------------------------|
| SCF energy:                           | -993.984724 hartree     |
| Zero-point correction:                | +0.333745 hartree       |
| Enthalpy correction:                  | +0.355224 hartree       |
| Free energy correction:               | +0.280993 hartree       |
| Quasiharmonic free energy correction: | +0.287269 hartree       |
| Imaginary Frequency:                  | 707.4 $\text{icm}^{-1}$ |

#### Cartesian Coordinates

|   |          |          |          |
|---|----------|----------|----------|
| C | 4.36905  | -1.62869 | -0.98008 |
| C | 4.25915  | -0.69029 | 0.04857  |
| C | 3.22338  | -2.22869 | -1.50543 |
| C | 1.97067  | -1.88521 | -1.01269 |
| C | 1.85309  | -0.92866 | 0.00888  |
| C | 3.01289  | -0.33769 | 0.55170  |
| C | 2.81046  | 0.59918  | 1.70494  |
| C | 1.51537  | 1.36833  | 1.55193  |
| H | 3.64009  | 1.30635  | 1.79533  |
| H | 2.78634  | 0.02580  | 2.64301  |
| N | 0.36673  | 0.47135  | 1.30724  |
| H | 1.55239  | 2.04270  | 0.68652  |
| H | 1.28198  | 1.96262  | 2.43743  |
| C | 0.56122  | -0.57500 | 0.52890  |
| H | 1.07092  | -2.34119 | -1.41927 |
| H | 5.34840  | -1.89287 | -1.36815 |
| H | 3.30904  | -2.96142 | -2.30222 |
| H | 5.15319  | -0.23289 | 0.46686  |
| C | -0.88314 | 0.99850  | 1.67673  |
| C | -2.07052 | 0.10189  | 1.45211  |
| O | -0.04619 | 1.84383  | -1.35177 |
| C | -2.61932 | 0.14982  | 0.02095  |
| H | -1.83043 | -0.94284 | 1.72129  |
| H | -2.86378 | 0.40924  | 2.14278  |
| C | -3.70611 | -0.85921 | -0.24041 |
| H | -1.81748 | 0.03717  | -0.71582 |
| H | -3.04812 | 1.14046  | -0.16580 |
| N | -3.21022 | -2.29171 | -0.23427 |
| H | -4.15459 | -0.74717 | -1.23161 |
| H | -4.51288 | -0.84553 | 0.49556  |
| O | -2.01924 | -2.49868 | -0.45922 |
| O | -4.04666 | -3.16603 | -0.03329 |
| H | -0.30800 | -1.15874 | 0.24804  |
| H | -1.03103 | 2.21651  | 0.79470  |
| H | -0.80956 | 1.42875  | 2.67801  |
| C | -0.63645 | 2.88473  | -1.06138 |
| C | -0.81522 | 4.01774  | -2.03756 |
| H | -0.30166 | 3.80335  | -2.97426 |
| H | -0.43604 | 4.95013  | -1.61229 |
| H | -1.87936 | 4.17326  | -2.23472 |
| O | -1.17693 | 3.12692  | 0.11437  |

## 7.4 Acetylated Hemiaminal 24

|                                       |                     |
|---------------------------------------|---------------------|
| SCF energy:                           | -994.032938 hartree |
| Zero-point correction:                | +0.341345 hartree   |
| Enthalpy correction:                  | +0.362243 hartree   |
| Free energy correction:               | +0.289766 hartree   |
| Quasiharmonic free energy correction: | +0.295584 hartree   |

### Cartesian Coordinates

|   |          |          |          |
|---|----------|----------|----------|
| C | 4.18136  | -2.16378 | -0.70910 |
| C | 3.21931  | -2.50280 | 0.23645  |
| C | 4.04417  | -0.99140 | -1.45438 |
| C | 2.94295  | -0.17097 | -1.24242 |
| C | 1.97401  | -0.51132 | -0.29367 |
| C | 2.10621  | -1.68482 | 0.45845  |
| C | 1.05000  | -2.05816 | 1.46041  |
| C | 0.19100  | -0.86940 | 1.84785  |
| H | 1.51080  | -2.50107 | 2.35017  |
| H | 0.40565  | -2.83668 | 1.02786  |
| N | -0.25756 | -0.18429 | 0.63472  |
| H | 0.74202  | -0.18584 | 2.51641  |
| H | -0.69885 | -1.20193 | 2.39149  |
| C | 0.80728  | 0.40750  | -0.09033 |
| H | 2.82306  | 0.74700  | -1.81491 |
| H | 5.03968  | -2.81144 | -0.86422 |
| H | 4.79087  | -0.72181 | -2.19532 |
| H | 3.32868  | -3.41483 | 0.81990  |
| C | -1.41265 | 0.68836  | 0.83280  |
| C | -2.08212 | 1.08786  | -0.47753 |
| O | 1.33709  | 1.60356  | 0.65685  |
| C | -2.33779 | -0.08322 | -1.42189 |
| H | -3.02784 | 1.58582  | -0.22966 |
| H | -1.48394 | 1.84000  | -1.00370 |
| C | -3.03179 | -1.26377 | -0.76928 |
| H | -1.38926 | -0.47022 | -1.81070 |
| H | -2.92305 | 0.24976  | -2.28401 |
| N | -4.36214 | -0.84107 | -0.19797 |
| H | -2.46202 | -1.68214 | 0.06170  |
| H | -3.26456 | -2.04537 | -1.49520 |
| O | -5.19071 | -0.39334 | -0.98623 |
| O | -4.52973 | -0.94613 | 1.01552  |
| H | 0.44528  | 0.80928  | -1.04062 |
| H | -1.14914 | 1.59309  | 1.40850  |
| H | -2.12086 | 0.12881  | 1.45515  |
| C | 1.21536  | 2.81126  | 0.07751  |
| C | 1.67009  | 3.89326  | 1.00862  |
| H | 2.64718  | 3.65305  | 1.43201  |
| H | 0.97011  | 3.97264  | 1.84501  |
| H | 1.71059  | 4.84643  | 0.48455  |
| O | 0.78575  | 2.99734  | -1.04772 |

## 7.5 Transition State TS04

|                                       |                         |
|---------------------------------------|-------------------------|
| SCF energy:                           | -993.984958 hartree     |
| Zero-point correction:                | +0.338025 hartree       |
| Enthalpy correction:                  | +0.357655 hartree       |
| Free energy correction:               | +0.290625 hartree       |
| Quasiharmonic free energy correction: | +0.293419 hartree       |
| Imaginary Frequency:                  | 643.8 $\text{icm}^{-1}$ |

### Cartesian Coordinates

|   |          |          |          |
|---|----------|----------|----------|
| C | 2.37642  | -0.63251 | 0.82918  |
| C | 1.38058  | -1.11481 | 1.84082  |
| C | 1.85099  | -0.03157 | -0.32275 |
| C | 0.36841  | 0.15304  | -0.38625 |
| N | -0.37766 | -1.06748 | 0.04148  |
| C | 0.27772  | -1.87859 | 1.12753  |
| C | -0.79029 | -1.92504 | -1.12266 |
| C | -1.99822 | -2.75395 | -0.72938 |
| H | 0.07211  | -2.52851 | -1.42770 |
| H | -1.05784 | -1.24052 | -1.93216 |
| C | -3.22795 | -1.88063 | -0.44948 |
| H | -1.75628 | -3.37825 | 0.14125  |
| H | -2.21030 | -3.44990 | -1.54696 |
| C | -3.01046 | -0.75611 | 0.54361  |
| H | -4.03579 | -2.52724 | -0.08792 |
| H | -3.56288 | -1.44566 | -1.39844 |
| N | -3.01397 | 0.53989  | 0.04748  |
| H | -3.50856 | -0.80365 | 1.50704  |
| O | -2.57516 | 0.74106  | -1.12747 |
| O | -3.32958 | 1.50135  | 0.79597  |
| C | 2.68984  | 0.40705  | -1.34502 |
| C | 4.06845  | 0.24755  | -1.21862 |
| C | 4.59824  | -0.34781 | -0.07469 |
| C | 3.75527  | -0.79273 | 0.94407  |
| H | 4.16973  | -1.26699 | 1.83065  |
| H | 5.67285  | -0.47171 | 0.02339  |
| H | 2.26159  | 0.88730  | -2.22067 |
| H | 4.72812  | 0.59081  | -2.00960 |
| H | 0.95104  | -0.27457 | 2.39860  |
| H | 1.84487  | -1.78024 | 2.57367  |
| H | 0.69125  | -2.77855 | 0.66000  |
| H | -0.51674 | -2.18454 | 1.81477  |
| O | -0.07616 | 1.16753  | 0.52892  |
| H | 0.01727  | 0.41938  | -1.38609 |
| C | -0.08975 | 2.43655  | 0.00635  |
| C | -0.73095 | 3.38608  | 0.95268  |
| H | -0.50004 | 4.41020  | 0.66559  |
| H | -0.42060 | 3.19238  | 1.98073  |
| H | -1.81208 | 3.21441  | 0.90201  |
| O | 0.35587  | 2.68695  | -1.09129 |
| H | -1.39590 | -0.76515 | 0.46771  |

## 7.6 Ammonium Nitronate 25

|                                       |                     |
|---------------------------------------|---------------------|
| SCF energy:                           | -994.004084 hartree |
| Zero-point correction:                | +0.341243 hartree   |
| Enthalpy correction:                  | +0.360827 hartree   |
| Free energy correction:               | +0.294723 hartree   |
| Quasiharmonic free energy correction: | +0.297040 hartree   |

### Cartesian Coordinates

|   |          |          |          |
|---|----------|----------|----------|
| C | 2.66135  | -0.85995 | -0.29497 |
| C | 1.90572  | -2.04361 | -0.84623 |
| C | 2.02302  | 0.36770  | -0.05760 |
| C | 0.58892  | 0.55688  | -0.46017 |
| N | -0.15828 | -0.74719 | -0.43120 |
| C | 0.52515  | -1.68569 | -1.36456 |
| C | -0.34293 | -1.28785 | 0.95773  |
| C | -1.16325 | -2.56212 | 0.95939  |
| H | -0.86078 | -0.49670 | 1.50468  |
| H | 0.64159  | -1.42769 | 1.41373  |
| C | -2.50740 | -2.43862 | 0.21536  |
| H | -1.34539 | -2.81120 | 2.01047  |
| H | -0.58410 | -3.40033 | 0.54923  |
| C | -3.36462 | -1.30068 | 0.63951  |
| H | -3.05486 | -3.37552 | 0.36888  |
| H | -2.32687 | -2.36905 | -0.86600 |
| N | -3.35253 | -0.12287 | 0.02600  |
| H | -4.07296 | -1.37214 | 1.45420  |
| O | -4.12171 | 0.83057  | 0.36451  |
| O | -2.52378 | 0.09990  | -0.98875 |
| C | 2.73522  | 1.43792  | 0.48805  |
| C | 4.08136  | 1.29786  | 0.80589  |
| C | 4.72263  | 0.08090  | 0.57731  |
| C | 4.01407  | -0.98557 | 0.03437  |
| H | 4.51301  | -1.93623 | -0.14049 |
| H | 5.77409  | -0.03696 | 0.82173  |
| H | 2.22265  | 2.37882  | 0.66551  |
| H | 4.62745  | 2.13427  | 1.23097  |
| H | 1.82150  | -2.81293 | -0.06611 |
| H | 2.47350  | -2.51365 | -1.65534 |
| H | 0.57316  | -1.17582 | -2.33108 |
| H | -0.11031 | -2.56470 | -1.49024 |
| O | -0.10452 | 1.44512  | 0.37765  |
| H | 0.50765  | 0.92039  | -1.49341 |
| C | -0.79617 | 2.47395  | -0.26299 |
| C | -1.80506 | 3.05422  | 0.64948  |
| H | -1.46984 | 3.03651  | 1.68718  |
| H | -2.70289 | 2.41766  | 0.57029  |
| H | -2.05990 | 4.06521  | 0.33618  |
| O | -0.56019 | 2.78581  | -1.40433 |
| H | -1.17754 | -0.49280 | -0.77014 |

## 7.7 Transition State TS05

|                                         |                         |
|-----------------------------------------|-------------------------|
| SCF energy:                             | -993.984186 hartree     |
| Zero-point correction:                  | +0.339626 hartree       |
| Enthalpy correction:                    | +0.357693 hartree       |
| Free energy correction:                 | +0.296554 hartree       |
| Quasiharmonic free energy correction: + | 0.297459 hartree        |
| Imaginary Frequency:                    | 125.9 $\text{icm}^{-1}$ |

### Cartesian Coordinates

|   |          |          |          |
|---|----------|----------|----------|
| C | -2.66350 | 0.39796  | 0.49789  |
| C | -2.19619 | 1.20206  | 1.67904  |
| C | -1.73628 | -0.22006 | -0.35035 |
| C | -0.25760 | -0.08829 | -0.13616 |
| N | 0.15480  | 0.90373  | 0.86850  |
| C | -0.75911 | 0.87665  | 2.03662  |
| C | 0.31188  | 2.28227  | 0.33006  |
| C | 1.18712  | 2.46529  | -0.90683 |
| H | 0.70715  | 2.87693  | 1.16358  |
| H | -0.67915 | 2.69667  | 0.09194  |
| C | 2.68755  | 2.16549  | -0.77029 |
| H | 1.08245  | 3.51815  | -1.18987 |
| H | 0.78359  | 1.90065  | -1.75303 |
| C | 2.97402  | 0.77112  | -0.34642 |
| H | 3.14040  | 2.84013  | -0.03663 |
| H | 3.16327  | 2.38318  | -1.73511 |
| N | 2.51715  | -0.23434 | -1.04889 |
| H | 3.43504  | 0.50853  | 0.59264  |
| O | 2.53776  | -1.50254 | -0.41672 |
| O | 2.02344  | -0.20029 | -2.20160 |
| C | -2.17820 | -0.96845 | -1.44741 |
| C | -3.53492 | -1.10835 | -1.70733 |
| C | -4.46418 | -0.48934 | -0.86851 |
| C | -4.02819 | 0.25607  | 0.22042  |
| H | -4.75222 | 0.73283  | 0.87815  |
| H | -5.52804 | -0.59161 | -1.06327 |
| H | -1.43986 | -1.44166 | -2.09072 |
| H | -3.86927 | -1.69243 | -2.55953 |
| H | -2.83575 | 1.00359  | 2.54583  |
| H | -2.31229 | 2.27493  | 1.47287  |
| H | -0.35918 | 1.56645  | 2.78591  |
| H | -0.69088 | -0.13480 | 2.45209  |
| O | 0.22313  | -1.45325 | 0.25692  |
| H | 0.22687  | 0.15232  | -1.08255 |
| C | 1.54552  | -1.59488 | 0.73417  |
| C | 1.72466  | -3.02593 | 1.16521  |
| H | 1.02845  | -3.23470 | 1.97839  |
| H | 2.74486  | -3.17041 | 1.52201  |
| H | 1.52806  | -3.70480 | 0.33543  |
| O | 1.83939  | -0.70192 | 1.70547  |
| H | 1.25754  | 0.16451  | 1.42154  |

## 7.8 Transition State TS06

|                                       |                         |
|---------------------------------------|-------------------------|
| SCF energy:                           | -993.983563 hartree     |
| Zero-point correction:                | +0.333592 hartree       |
| Enthalpy correction:                  | +0.355097 hartree       |
| Free energy correction:               | +0.281020 hartree       |
| Quasiharmonic free energy correction: | +0.286969 hartree       |
| Imaginary Frequency:                  | 720.4 $\text{icm}^{-1}$ |

### Cartesian Coordinates

|   |          |          |          |
|---|----------|----------|----------|
| C | 4.58859  | 0.78834  | -0.72164 |
| C | 3.96130  | 0.55098  | 0.50471  |
| C | 4.13904  | 0.14638  | -1.87493 |
| C | 3.05293  | -0.71785 | -1.80451 |
| C | 2.41226  | -0.94638 | -0.57856 |
| C | 2.88067  | -0.31611 | 0.59416  |
| C | 2.21332  | -0.67593 | 1.89811  |
| C | 0.73952  | -0.91542 | 1.68016  |
| H | 2.71807  | -1.56227 | 2.32802  |
| H | 2.34668  | 0.12890  | 2.62905  |
| N | 0.46742  | -1.73430 | 0.57310  |
| H | 0.09309  | 0.44807  | 1.44721  |
| H | 0.19682  | -1.27528 | 2.55656  |
| C | 1.23053  | -1.75790 | -0.50534 |
| H | 2.67391  | -1.20032 | -2.70241 |
| H | 5.43114  | 1.47190  | -0.77363 |
| H | 4.62672  | 0.32925  | -2.82763 |
| H | 4.32164  | 1.04638  | 1.40367  |
| C | -0.82262 | -2.44824 | 0.56301  |
| C | -2.00394 | -1.49171 | 0.57650  |
| O | 0.43902  | 1.57132  | -0.67230 |
| C | -2.03632 | -0.59918 | -0.65641 |
| H | -2.91768 | -2.09175 | 0.64355  |
| H | -1.96326 | -0.87521 | 1.48333  |
| C | -3.01880 | 0.53610  | -0.55265 |
| H | -2.24659 | -1.19362 | -1.55251 |
| H | -1.05421 | -0.13312 | -0.80570 |
| N | -4.46697 | 0.09258  | -0.54130 |
| H | -2.95906 | 1.22424  | -1.40090 |
| H | -2.89880 | 1.12438  | 0.36082  |
| O | -4.73146 | -1.05077 | -0.90313 |
| O | -5.29401 | 0.92720  | -0.18543 |
| H | 0.86715  | -2.31912 | -1.35985 |
| H | -0.84008 | -3.10319 | 1.43900  |
| H | -0.83992 | -3.07689 | -0.33175 |
| C | -0.05179 | 2.11821  | 0.31332  |
| C | -0.40300 | 3.58239  | 0.34406  |
| H | 0.23418  | 4.09935  | 1.06662  |
| H | -1.43398 | 3.72370  | 0.67896  |
| H | -0.26722 | 4.03117  | -0.63943 |
| O | -0.33629 | 1.49892  | 1.44268  |



## 7.9 Azomethine Ylide 26

|                                       |                     |
|---------------------------------------|---------------------|
| SCF energy:                           | -764.865605 hartree |
| Zero-point correction:                | +0.273895 hartree   |
| Enthalpy correction:                  | +0.290201 hartree   |
| Free energy correction:               | +0.228428 hartree   |
| Quasiharmonic free energy correction: | +0.233074 hartree   |

### Cartesian Coordinates

|   |          |          |          |
|---|----------|----------|----------|
| C | 3.97582  | -1.73937 | -0.69782 |
| C | 3.54827  | -0.53420 | -1.25813 |
| C | 3.53808  | -2.09362 | 0.58302  |
| C | 2.65791  | -1.27699 | 1.27892  |
| C | 2.20540  | -0.06402 | 0.71658  |
| C | 2.70556  | 0.31975  | -0.55436 |
| C | 2.35061  | 1.71189  | -1.01495 |
| C | 0.92574  | 1.97499  | -0.68830 |
| H | 2.53347  | 1.84458  | -2.08522 |
| H | 3.00068  | 2.44535  | -0.49408 |
| N | 0.48701  | 1.57905  | 0.50717  |
| C | 1.19285  | 0.73895  | 1.32187  |
| H | 2.28817  | -1.57842 | 2.25688  |
| H | 4.66271  | -2.38184 | -1.24074 |
| H | 3.87595  | -3.02356 | 1.03318  |
| H | 3.91083  | -0.23089 | -2.23897 |
| C | -0.88600 | 1.92883  | 0.91563  |
| C | -1.81089 | 0.72264  | 0.89900  |
| C | -1.81548 | 0.00345  | -0.44295 |
| H | -2.81820 | 1.07756  | 1.14525  |
| H | -1.52133 | 0.02179  | 1.69162  |
| C | -2.73004 | -1.19388 | -0.47551 |
| H | -0.80602 | -0.36036 | -0.67184 |
| H | -2.08711 | 0.69551  | -1.24760 |
| N | -4.19327 | -0.82627 | -0.33983 |
| H | -2.54453 | -1.91197 | 0.32527  |
| H | -2.68133 | -1.73057 | -1.42688 |
| O | -4.94624 | -1.69958 | 0.08063  |
| O | -4.54096 | 0.30090  | -0.68071 |
| H | 0.23412  | 2.51383  | -1.32225 |
| H | -0.83153 | 2.36624  | 1.91643  |
| H | -1.23833 | 2.70578  | 0.23206  |
| H | 0.71681  | 0.47646  | 2.25814  |

## 7.10 Transition State TS07

|                                       |                     |
|---------------------------------------|---------------------|
| SCF energy:                           | -993.987342 hartree |
| Zero-point correction:                | +0.334078 hartree   |
| Enthalpy correction:                  | +0.355492 hartree   |
| Free energy correction:               | +0.281912 hartree   |
| Quasiharmonic free energy correction: | +0.287527 hartree   |

Imaginary Frequency:

812.8  $\text{icm}^{-1}$

### Cartesian Coordinates

|   |          |          |          |
|---|----------|----------|----------|
| C | -2.38609 | -1.01983 | -0.68596 |
| C | -1.14610 | -1.22753 | -1.51783 |
| C | -2.25525 | -0.51926 | 0.62047  |
| C | -0.92519 | -0.24996 | 1.18173  |
| N | 0.11579  | -0.98585 | 0.55325  |
| C | 0.05926  | -1.41518 | -0.67702 |
| C | 1.35153  | -1.16819 | 1.33838  |
| C | 2.05287  | 0.15508  | 1.62890  |
| H | 1.98349  | -1.87022 | 0.79029  |
| H | 1.06324  | -1.65203 | 2.27626  |
| C | 2.53402  | 0.91126  | 0.39122  |
| H | 2.89223  | -0.06202 | 2.30092  |
| H | 1.36791  | 0.79539  | 2.19278  |
| C | 3.91453  | 0.51211  | -0.10210 |
| H | 1.80737  | 0.82338  | -0.42560 |
| H | 2.59175  | 1.98061  | 0.61828  |
| N | 3.93454  | -0.94638 | -0.47089 |
| O | 4.56424  | -1.71614 | 0.25124  |
| O | 3.26662  | -1.28718 | -1.44649 |
| C | -3.41405 | -0.27157 | 1.37063  |
| C | -4.67463 | -0.52205 | 0.83951  |
| C | -4.79978 | -1.04049 | -0.44942 |
| C | -3.65236 | -1.29242 | -1.20007 |
| H | -3.73976 | -1.69390 | -2.20793 |
| H | -5.78095 | -1.24325 | -0.86839 |
| H | -3.31590 | 0.11761  | 2.38201  |
| H | -5.56048 | -0.32020 | 1.43545  |
| H | -0.97152 | -0.35663 | -2.16743 |
| H | -1.25170 | -2.08807 | -2.18949 |
| O | -0.17421 | 1.72453  | -1.31260 |
| C | -0.32908 | 2.58225  | -0.43807 |
| C | -0.35465 | 4.05601  | -0.75311 |
| H | -1.31225 | 4.48626  | -0.44880 |
| H | -0.19998 | 4.22865  | -1.81799 |
| H | 0.41836  | 4.57641  | -0.18086 |
| O | -0.47157 | 2.31651  | 0.83674  |
| H | 0.94919  | -1.90030 | -1.06593 |
| H | -0.63551 | 1.15489  | 0.97734  |
| H | -0.85729 | -0.37905 | 2.26490  |
| H | 4.68829  | 0.63494  | 0.65626  |
| H | 4.18038  | 1.05011  | -1.01340 |

### 7.11 Acetylated Hemiaminal 27

|                                       |                     |
|---------------------------------------|---------------------|
| SCF energy:                           | -994.029360 hartree |
| Zero-point correction:                | +0.340531 hartree   |
| Enthalpy correction:                  | +0.361953 hartree   |
| Free energy correction:               | +0.286299 hartree   |
| Quasiharmonic free energy correction: | +0.294070 hartree   |

### Cartesian Coordinates

|   |          |          |          |
|---|----------|----------|----------|
| C | -3.19860 | -0.21781 | -0.52421 |
| C | -2.25022 | 0.61332  | -1.33796 |
| C | -2.70152 | -1.21235 | 0.32477  |
| C | -1.22455 | -1.42164 | 0.49013  |
| N | -0.41080 | -0.75407 | -0.52500 |
| C | -0.83051 | 0.57045  | -0.81988 |
| C | 1.00610  | -0.89014 | -0.19567 |
| C | 1.94354  | -0.30588 | -1.24080 |
| H | 1.20189  | -1.96666 | -0.09666 |
| H | 1.21207  | -0.44676 | 0.79804  |
| C | 3.38728  | -0.76648 | -1.06336 |
| H | 1.91248  | 0.79151  | -1.21693 |
| H | 1.59674  | -0.60453 | -2.23641 |
| C | 3.95993  | -0.31629 | 0.25917  |
| H | 4.00353  | -0.36648 | -1.87359 |
| H | 3.45059  | -1.85732 | -1.13847 |
| N | 5.42410  | -0.64951 | 0.42266  |
| O | 5.97449  | -0.20420 | 1.42617  |
| O | 5.96563  | -1.34162 | -0.43289 |
| C | -3.59413 | -1.99721 | 1.06234  |
| C | -4.96695 | -1.80390 | 0.96094  |
| C | -5.46427 | -0.81166 | 0.11466  |
| C | -4.58137 | -0.02732 | -0.61895 |
| H | -4.96257 | 0.75049  | -1.27779 |
| H | -6.53510 | -0.65015 | 0.02999  |
| H | -3.20147 | -2.76830 | 1.72274  |
| H | -5.64717 | -2.42340 | 1.53836  |
| H | -2.58157 | 1.65582  | -1.38893 |
| H | -2.22961 | 0.25155  | -2.37393 |
| O | -0.74085 | 1.39210  | 0.42125  |
| C | -0.40739 | 2.68666  | 0.27005  |
| C | -0.34738 | 3.38473  | 1.59367  |
| H | -1.35809 | 3.48702  | 1.99756  |
| H | 0.08981  | 4.37460  | 1.47537  |
| H | 0.22650  | 2.80190  | 2.31681  |
| O | -0.19541 | 3.21085  | -0.80877 |
| H | -0.15245 | 1.03144  | -1.53888 |
| H | -0.92574 | -1.08610 | 1.50265  |
| H | -0.99059 | -2.49311 | 0.44778  |
| H | 3.48474  | -0.78578 | 1.12534  |
| H | 3.90226  | 0.76551  | 0.40796  |

### 7.12 Transition State TS08

|                                       |                         |
|---------------------------------------|-------------------------|
| SCF energy:                           | -993.989242 hartree     |
| Zero-point correction:                | +0.337915 hartree       |
| Enthalpy correction:                  | +0.357682 hartree       |
| Free energy correction:               | +0.289796 hartree       |
| Quasiharmonic free energy correction: | +0.293282 hartree       |
| Imaginary Frequency:                  | 650.6 $\text{icm}^{-1}$ |

### Cartesian Coordinates

|   |          |          |          |
|---|----------|----------|----------|
| C | -1.92821 | -0.25351 | -0.59869 |
| C | -0.73257 | 0.07018  | -1.45372 |
| C | -1.84320 | -0.22027 | 0.79931  |
| C | -0.57308 | 0.18396  | 1.49256  |
| N | 0.60085  | 0.09293  | 0.58594  |
| C | 0.34408  | 0.80769  | -0.69822 |
| C | 1.89616  | 0.44692  | 1.25822  |
| C | 2.39265  | -0.74381 | 2.06038  |
| H | 1.73627  | 1.34118  | 1.87194  |
| H | 2.59790  | 0.69470  | 0.45817  |
| C | 2.70166  | -1.96601 | 1.18364  |
| H | 1.66016  | -1.00669 | 2.83542  |
| H | 3.29352  | -0.43070 | 2.59737  |
| C | 1.56930  | -2.40932 | 0.28174  |
| H | 2.98426  | -2.79557 | 1.84205  |
| H | 3.57283  | -1.73523 | 0.56055  |
| N | 1.71517  | -2.20571 | -1.08093 |
| H | 1.04478  | -3.33634 | 0.49070  |
| O | 1.03493  | -2.87956 | -1.90034 |
| O | 2.43280  | -1.23228 | -1.47457 |
| C | -2.96032 | -0.54836 | 1.57346  |
| C | -4.16054 | -0.90539 | 0.97125  |
| C | -4.24880 | -0.94345 | -0.42066 |
| C | -3.13971 | -0.62040 | -1.19323 |
| H | -3.20392 | -0.65259 | -2.27833 |
| H | -5.18025 | -1.22666 | -0.90172 |
| H | -2.88106 | -0.52560 | 2.65839  |
| H | -5.02049 | -1.16006 | 1.58326  |
| H | -1.02322 | 0.67579  | -2.31696 |
| H | -0.28957 | -0.84877 | -1.86245 |
| O | -0.12815 | 2.12673  | -0.39642 |
| C | 0.78602  | 3.14624  | -0.41621 |
| C | 0.10384  | 4.44895  | -0.16314 |
| H | -0.53551 | 4.69740  | -1.01400 |
| H | 0.84318  | 5.23539  | -0.02725 |
| H | -0.54525 | 4.38250  | 0.71230  |
| O | 1.96581  | 2.97895  | -0.62348 |
| H | 0.75163  | -1.02390 | 0.37438  |
| H | 1.29117  | 0.85264  | -1.23763 |
| H | -0.37003 | -0.47119 | 2.34518  |
| H | -0.62534 | 1.21197  | 1.87193  |

### 7.13 Ammonium Nitronate 28

|                                       |                     |
|---------------------------------------|---------------------|
| SCF energy:                           | -993.997999 hartree |
| Zero-point correction:                | +0.340571 hartree   |
| Enthalpy correction:                  | +0.360672 hartree   |
| Free energy correction:               | +0.292637 hartree   |
| Quasiharmonic free energy correction: | +0.295775 hartree   |

### Cartesian Coordinates

|   |          |          |          |
|---|----------|----------|----------|
| C | -2.43966 | 0.25424  | -0.82201 |
| C | -1.58827 | 1.20539  | -1.61060 |
| C | -1.83723 | -0.96354 | -0.48186 |
| C | -0.49578 | -1.23944 | -1.07429 |
| N | 0.45601  | -0.07267 | -0.94490 |
| C | -0.21814 | 1.28379  | -0.96562 |
| C | 1.57884  | -0.17146 | -1.94595 |
| C | 2.88882  | 0.30311  | -1.34556 |
| H | 1.63812  | -1.22325 | -2.24100 |
| H | 1.28307  | 0.41108  | -2.82538 |
| C | 3.64991  | -0.77395 | -0.53469 |
| H | 2.69393  | 1.18183  | -0.72243 |
| H | 3.53045  | 0.65409  | -2.16043 |
| C | 2.86666  | -1.86221 | 0.11936  |
| H | 4.26805  | -0.24646 | 0.20497  |
| H | 4.35204  | -1.27737 | -1.20854 |
| N | 1.97215  | -1.64202 | 1.07610  |
| H | 3.09992  | -2.90820 | -0.03597 |
| O | 1.37644  | -2.56575 | 1.70678  |
| O | 1.62846  | -0.37902 | 1.33023  |
| C | -2.50143 | -1.87461 | 0.33533  |
| C | -3.78470 | -1.58052 | 0.79312  |
| C | -4.39096 | -0.37366 | 0.44780  |
| C | -3.71366 | 0.55085  | -0.34727 |
| H | -4.17280 | 1.50564  | -0.59294 |
| H | -5.38745 | -0.14302 | 0.81303  |
| H | -2.01140 | -2.80261 | 0.61842  |
| H | -4.30567 | -2.28803 | 1.43090  |
| H | -1.45883 | 0.87064  | -2.65008 |
| H | -2.01866 | 2.20879  | -1.65002 |
| O | -0.39378 | 1.67305  | 0.38406  |
| C | 0.62180  | 2.39650  | 0.96865  |
| C | 0.43325  | 2.44268  | 2.44055  |
| H | -0.61923 | 2.54910  | 2.70534  |
| H | 1.02972  | 3.24367  | 2.87283  |
| H | 0.77632  | 1.48026  | 2.83499  |
| O | 1.52608  | 2.88445  | 0.32915  |
| H | 0.91047  | -0.13929 | 0.05414  |
| H | 0.46844  | 1.97308  | -1.46554 |
| H | 0.00154  | -2.09659 | -0.61336 |
| H | -0.58946 | -1.43541 | -2.15073 |

### 7.14 Transition State TS09

|                                       |                        |
|---------------------------------------|------------------------|
| SCF energy:                           | -993.983492 hartree    |
| Zero-point correction:                | +0.339488 hartree      |
| Enthalpy correction:                  | +0.357516 hartree      |
| Free energy correction:               | +0.296398 hartree      |
| Quasiharmonic free energy correction: | +0.297263 hartree      |
| Imaginary Frequency:                  | 81.6 $\text{icm}^{-1}$ |

### Cartesian Coordinates

|   |          |          |          |
|---|----------|----------|----------|
| C | -2.43687 | -0.57500 | 0.69620  |
| C | -1.13596 | -1.05254 | 1.26979  |
| C | -2.48987 | -0.34261 | -0.68563 |
| C | -1.18991 | -0.46331 | -1.41953 |
| N | -0.10138 | 0.22562  | -0.67164 |
| C | 0.10842  | -0.41401 | 0.64005  |
| C | -0.37195 | 1.69489  | -0.62304 |
| C | 0.56494  | 2.57996  | 0.18989  |
| H | -0.37519 | 2.01788  | -1.67235 |
| H | -1.39146 | 1.85601  | -0.24503 |
| C | 2.00148  | 2.74822  | -0.32296 |
| H | 0.59203  | 2.26192  | 1.23649  |
| H | 0.09611  | 3.56979  | 0.20280  |
| C | 2.73095  | 1.46048  | -0.43342 |
| H | 2.52666  | 3.43443  | 0.35382  |
| H | 1.99564  | 3.22078  | -1.31035 |
| N | 2.85244  | 0.69111  | 0.61835  |
| H | 3.07189  | 1.03229  | -1.36308 |
| O | 3.27862  | -0.63748 | 0.36922  |
| O | 2.60466  | 0.97881  | 1.81272  |
| C | -3.68278 | 0.05775  | -1.28352 |
| C | -4.83519 | 0.20942  | -0.51317 |
| C | -4.78468 | -0.01496 | 0.86177  |
| C | -3.58704 | -0.39830 | 1.46467  |
| H | -3.54535 | -0.56790 | 2.53845  |
| H | -5.67705 | 0.11498  | 1.46726  |
| H | -3.70799 | 0.25403  | -2.35363 |
| H | -5.76588 | 0.51514  | -0.98220 |
| H | -1.04545 | -2.13138 | 1.08937  |
| H | -1.10909 | -0.92432 | 2.35502  |
| O | 1.06606  | -1.56116 | 0.51465  |
| C | 2.20275  | -1.45692 | -0.31394 |
| C | 2.85397  | -2.81394 | -0.37085 |
| H | 2.15663  | -3.51753 | -0.82717 |
| H | 3.11593  | -3.15699 | 0.63000  |
| H | 3.75392  | -2.75610 | -0.98395 |
| O | 1.90507  | -0.95925 | -1.53711 |
| H | 1.07751  | -0.29324 | -1.33347 |
| H | 0.56488  | 0.31438  | 1.30940  |
| H | -0.87433 | -1.50944 | -1.52698 |
| H | -1.24175 | -0.03404 | -2.42489 |

## 8 References

- 1 Banks, J. L.; Beard, H. S.; Cao, Y.; Cho, A. E.; Damm, W.; Farid, R.; Felts, A. K.; Halgren, T. A.; Mainz, D. T.; Maple, J. R.; Murphy, R.; Philipp, D. M.; Repasky, M. P.; Zhang, L. Y.; Berne, B. J.; Friesner, R. A.; Gallicchio, E.; Levy, R. M. *J. Comput. Chem.* **2005**, *26*, 1752–1780.
- 2 MacroModel, V. 10.6, Schrödinger, LLC, New York, NY, **2014**.
- 3 Zhao, Y.; Truhlar, D. G. *J. Chem. Phys.* **2006**, *125*, 194101.
- 4 Grimme, S.; Antony, J.; Ehrlich, S.; Krieg, H. *J. Chem. Phys.* **2010**, *132*, 154104.
- 5 Cancès, E.; Mennucci, B.; Tomasi, J. *J. Chem. Phys.* **1997**, *107*, 3032–3041.
- 6 Ribeiro, R. F.; Marenich, A. V.; Cramer, C. J.; Truhlar, D. G. *J. Phys. Chem. B* **2011**, *115*, 14556–14562.
- 7 Zhao, Y.; Truhlar, D. G. *Theor. Chem. Acc.* **2008**, *120*, 215–241.
- 8 Weigend, F.; Ahlrichs, R. *Phys. Chem. Chem. Phys.* **2005**, *7*, 3297–3305.
- 9 Goerigk, L.; Grimme, S. *Phys. Chem. Chem. Phys.* **2011**, *13*, 6670–6688.
- 10 Frisch, M. J.; Trucks, G. W.; Schlegel, H. B.; Scuseria, G. E.; Robb, M. A.; Cheeseman, J. R.; Scalmani, G.; Barone, V.; Mennucci, B.; Petersson, G. A.; Nakatsuji, H.; Caricato, M.; Li, X.; Hratchian, H. P.; Izmaylov, A. F.; Bloino, J.; Zheng, G.; Sonnenberg, J. L.; Hada, M.; Ehara, M.; Toyota, K.; Fukuda, R.; Hasegawa, J.; Ishida, M.; Nakajima, T.; Honda, Y.; Kitao, O.; Nakai, H.; Vreven, T.; Montgomery, J. A.; Peralta, J. E.; Ogliaro, F.; Bearpark, M.; Heyd, J. J.; Brothers, E.; Kudin, K. N.; Staroverov, V. N.; Kobayashi, R.; Normand, J.; Raghavachari, K.; Rendell, A.; Burant, J. C.; Iyengar, S. S.; Tomasi, J.; Cossi, M.; Rega, N.; Millam, J. M.; Klene, M.; Knox, J. E.; Cross, J. B.; Bakken, V.; Adamo, C.; Jaramillo, J.; Gomperts, R.; Stratmann, R. E.; Yazyev, O.; Austin, A. J.; Cammi, R.; Pomelli, C.; Ochterski, J. W.; Martin, R. L.; Morokuma, K.; Zakrzewski, V. G.; Voth, G. A.; Salvador, P.; Dannenberg, J. J.; Dapprich, S.; Daniels, A. D.; Farkas, Ö.; Foresman, J. B.; Ortiz, J. V.; Cioslowski, J.; Fox, D. J. Gaussian, Inc., Wallingford CT, **2009**.

## Part II: Experimental Part

**Table S1.** Additional experiments regarding the regioselectivity of the asymmetric redox-annulation.

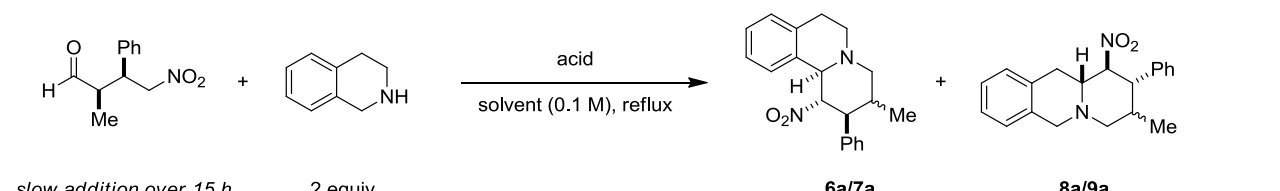

$\text{slow addition over 15 h}$        $2 \text{ equiv}$

| entry          | acid (equiv) | solvent | ratio of <b>6a/7a</b> and <b>8a/9a</b> <sup>c</sup> | yield of <b>6a/7a</b> (%) <sup>b</sup> | yield of <b>8a/9a</b> (%) <sup>b</sup> | dr of <b>8a/9a</b> <sup>c</sup> |
|----------------|--------------|---------|-----------------------------------------------------|----------------------------------------|----------------------------------------|---------------------------------|
| 1              | AcOH (10)    | toluene | 5:1                                                 | 55                                     | 14                                     | 1:1                             |
| 2              | 2-EHA (10)   | toluene | 1:1.4                                               | ND                                     | 40                                     | 1:1                             |
| 3              | 2-EHA (5)    | toluene | 1:2.4                                               | ND                                     | 41                                     | 1:1                             |
| 4              | 2-EHA (2.5)  | toluene | 1:1.5                                               | ND                                     | ND                                     | 1.4:1                           |
| 5              | 2-EHA (5)    | xylenes | 1:8.5                                               | ND                                     | 58                                     | 1.4:1                           |
| 6              | 2-EHA (10)   | xylenes | 1:8.6                                               | ND                                     | 62                                     | 1.2:1                           |
| 7 <sup>a</sup> | 2-EHA (10)   | xylenes | 1.2:1                                               | ND                                     | ND                                     | 1:1                             |

<sup>a</sup> Addition of aldehyde over 2 min. <sup>b</sup> Isolated yield of both diastereomers. <sup>c</sup> Regioisomeric and diastereomeric ratios were determined by <sup>1</sup>H NMR of crude reaction mixtures. ND: not determined.



## Crystal Structure for Compound 6c

Compound **6c** was recrystallized from methanol and dichloromethane.

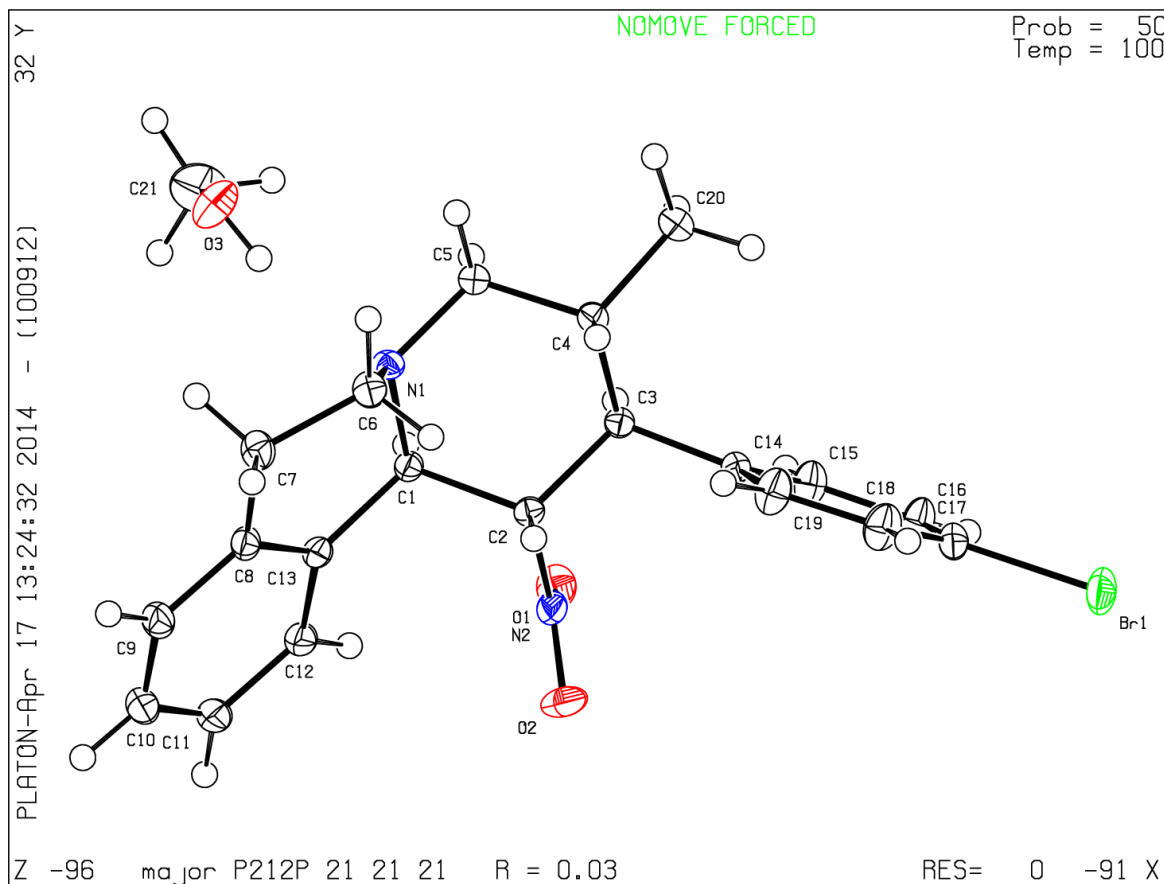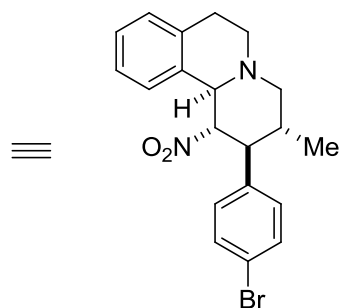

The ellipsoid contour probability level for the thermal ellipsoid plot is 50%.



## Crystal Structure for Compound **8c**

Compound **8c** was recrystallized from dichloromethane and pentane.

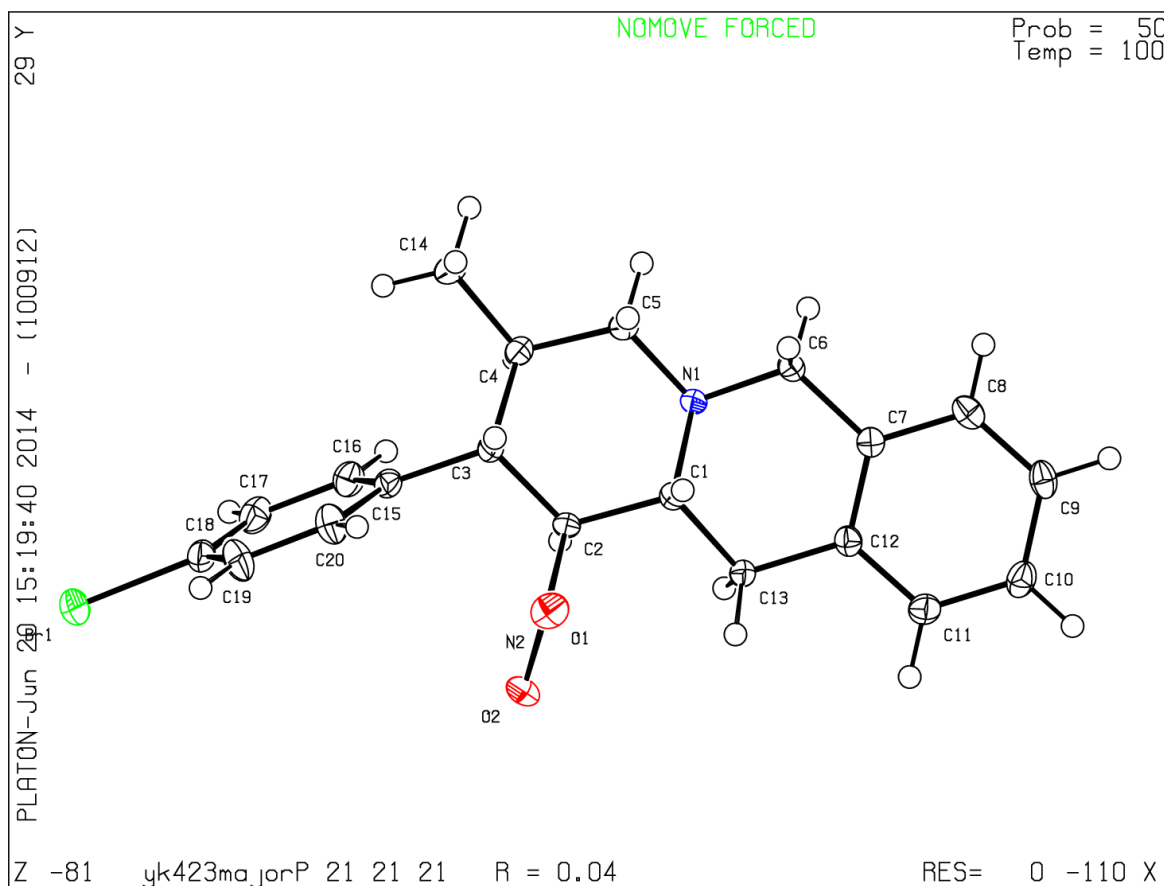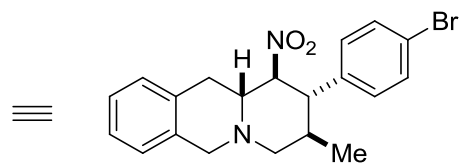

The ellipsoid contour probability level for the thermal ellipsoid plot is 50%.

## 2D-NMR Analysis for Compound 6a, Selected Interactions

Gcosy

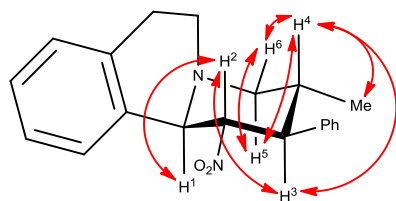

Noesy

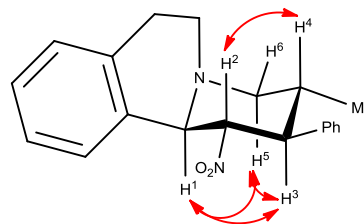

<sup>1</sup>H NMR shifts

| Proton                          | Chemical shift |
|---------------------------------|----------------|
| H <sup>1</sup>                  | 4.39           |
| H <sup>2</sup>                  | 4.97           |
| H <sup>3</sup>                  | 3.11           |
| H <sup>4</sup>                  | 2.30–2.23      |
| H <sup>5</sup> , H <sup>6</sup> | 3.00–2.92      |
| Me                              | 0.73           |

## 2D-NMR Analysis for Compound 7a, Selected Interactions

Gcosy

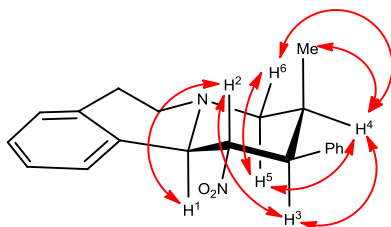

Noesy

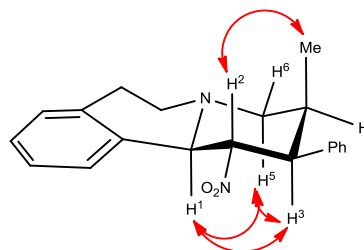

<sup>1</sup>H NMR shifts

| Proton         | Chemical shift |
|----------------|----------------|
| H <sup>1</sup> | 4.20           |
| H <sup>2</sup> | 5.09           |
| H <sup>3</sup> | 3.82           |
| H <sup>4</sup> | 2.18–2.09      |
| H <sup>5</sup> | 3.25           |
| H <sup>6</sup> | 2.98           |
| Me             | 0.95           |

## 2D-NMR Analysis for Compound 6k, Selected Interactions

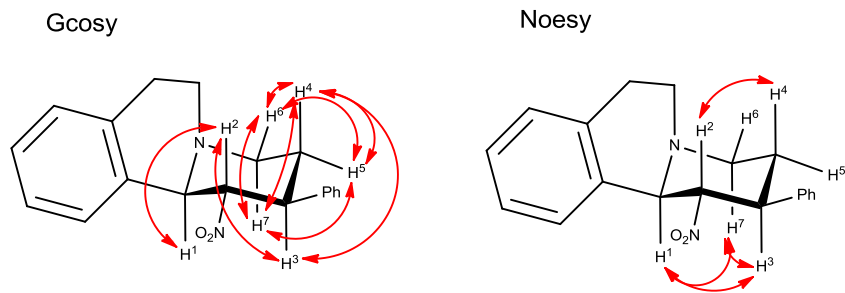

<sup>1</sup>H NMR shifts

| Proton                          | Chemical shift |
|---------------------------------|----------------|
| H <sup>1</sup>                  | 4.37           |
| H <sup>2</sup>                  | 4.97           |
| H <sup>3</sup>                  | 3.56           |
| H <sup>4</sup>                  | 2.17–2.09      |
| H <sup>5</sup>                  | 1.83–1.77      |
| H <sup>6</sup> , H <sup>7</sup> | 3.38–3.22      |

## 2D-NMR Analysis for Compound 8a, Selected Interactions

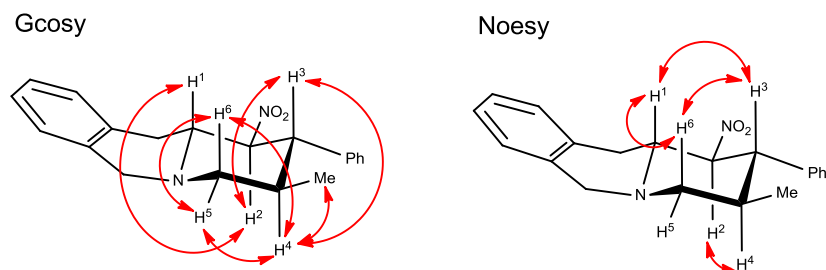

<sup>1</sup>H NMR shifts

| Proton                                                            | Chemical shift |
|-------------------------------------------------------------------|----------------|
| H <sup>1</sup> , H <sup>3</sup> , H <sup>5</sup> , H <sup>6</sup> | 3.01–2.77      |
| H <sup>2</sup>                                                    | 4.66           |
| H <sup>4</sup>                                                    | 2.26–2.13      |
| Me                                                                | 0.78           |

## 2D-NMR Analysis for Compound 9a, Selected Interactions

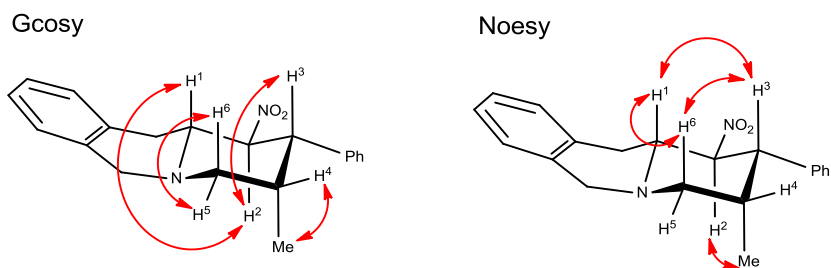

<sup>1</sup>H NMR shifts

| Proton         | Chemical shift |
|----------------|----------------|
| H <sup>1</sup> | 2.92–2.82      |
| H <sup>2</sup> | 5.09           |
| H <sup>3</sup> | 3.65           |
| H <sup>4</sup> | 2.31–2.14      |
| H <sup>5</sup> | 3.16–3.02      |
| H <sup>6</sup> | 2.70           |
| Me             | 1.00           |

## 2D-NMR Analysis for Compound 8k, Selected Interactions

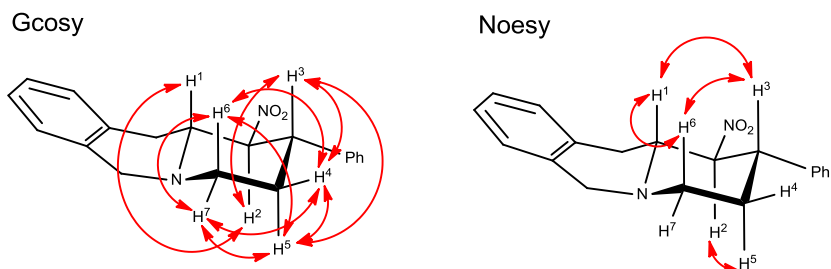

<sup>1</sup>H NMR shifts

| Proton                          | Chemical shift |
|---------------------------------|----------------|
| H <sup>1</sup>                  | 3.02–2.91      |
| H <sup>2</sup>                  | 4.62           |
| H <sup>3</sup>                  | 3.30           |
| H <sup>4</sup> , H <sup>5</sup> | 2.16–1.95      |
| H <sup>6</sup>                  | 2.49           |
| H <sup>7</sup>                  | 3.23           |

## 2D-NMR Analysis for Compound 11, Selected Interactions

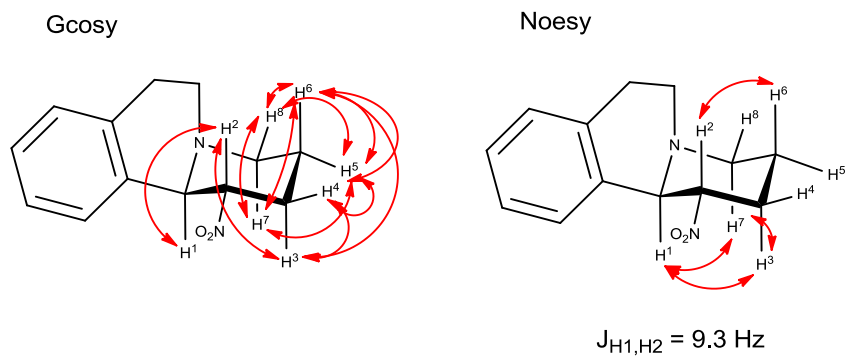

### <sup>1</sup>H NMR shifts

| Proton                          | Chemical shift |
|---------------------------------|----------------|
| H <sup>1</sup>                  | 4.20           |
| H <sup>2</sup>                  | 4.74–4.62      |
| H <sup>3</sup> , H <sup>4</sup> | 2.30–2.23      |
| H <sup>5</sup>                  | 1.72–1.61      |
| H <sup>6</sup>                  | 1.94           |
| H <sup>7</sup> , H <sup>8</sup> | 3.04–2.93      |

## HPLC Profile of 5a

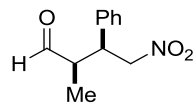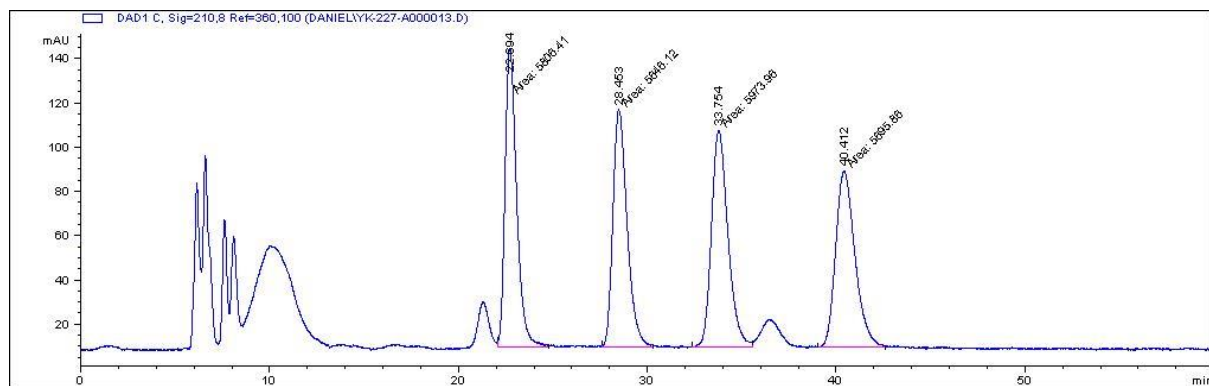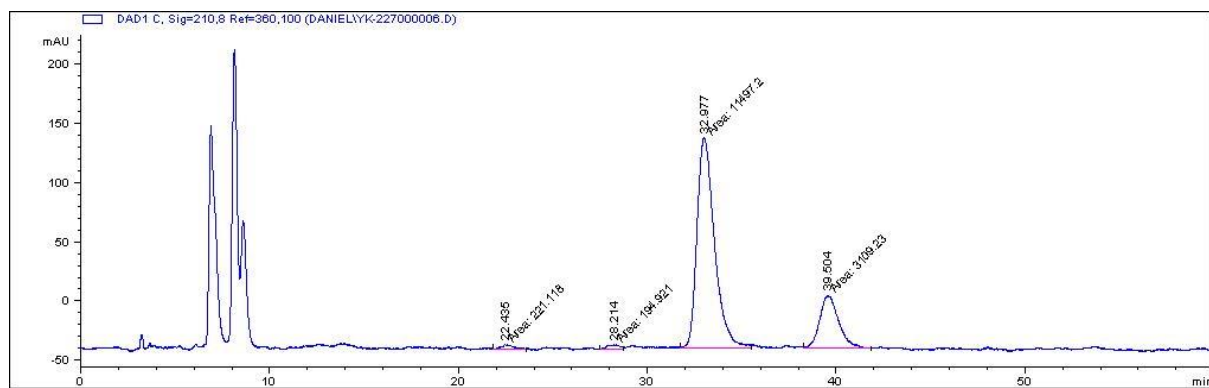



## HPLC Profile of 6a

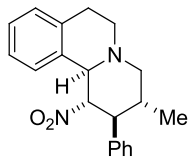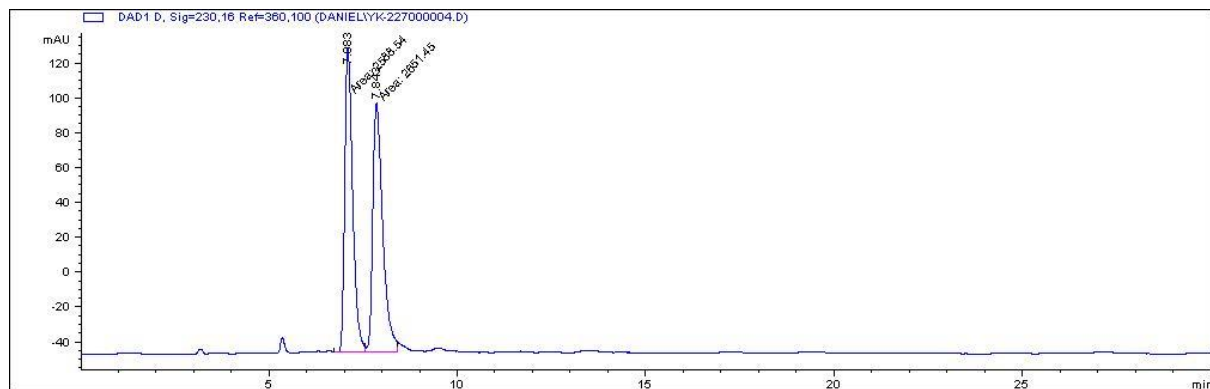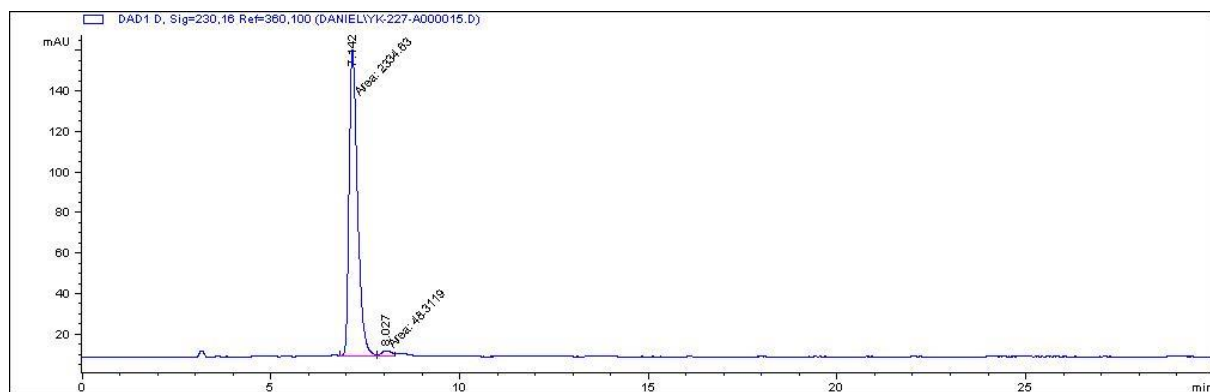

## HPLC Profile of 7a

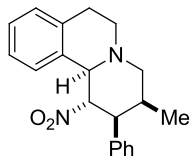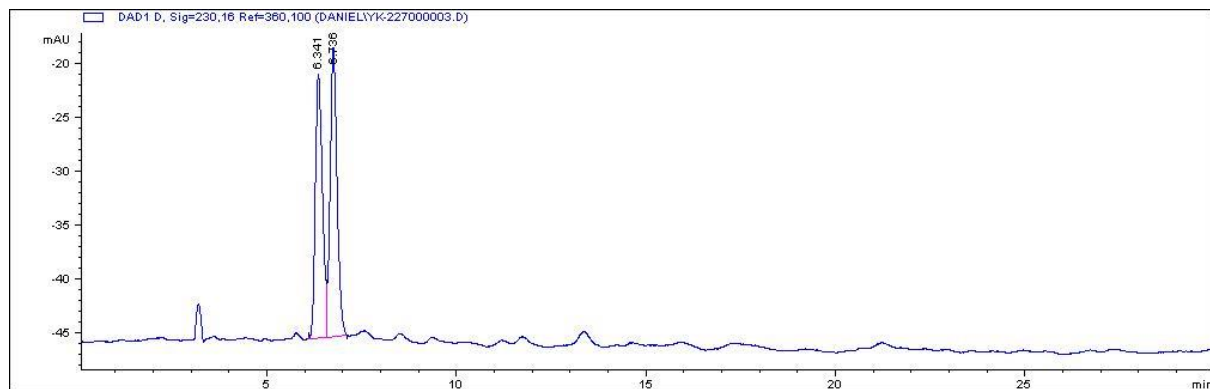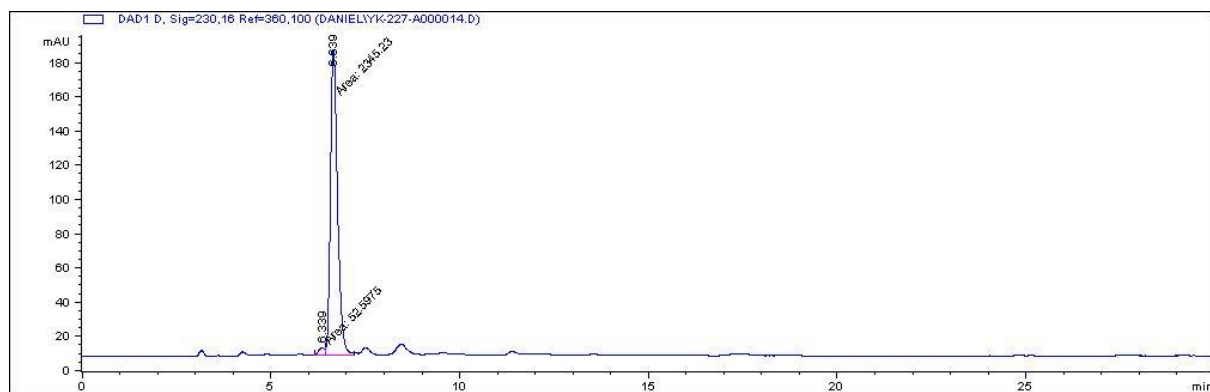

# HPLC Profile of 5k (Product was reduced to the corresponding alcohol using NaBH<sub>4</sub> for HPLC analysis)

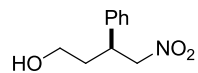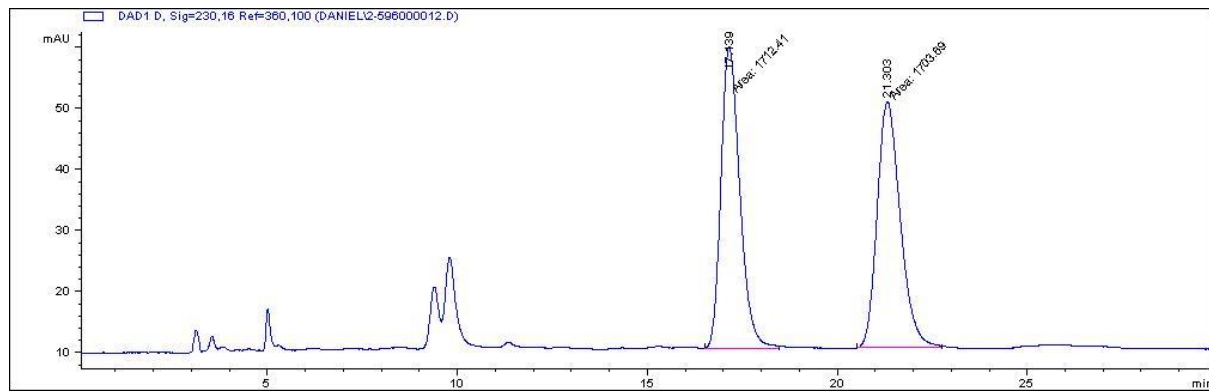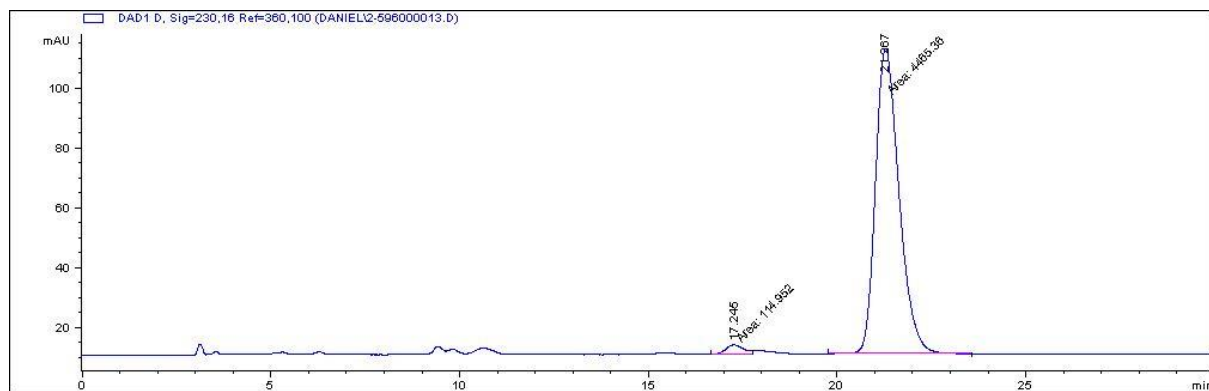

## HPLC Profile of 6k

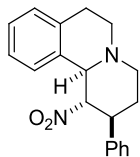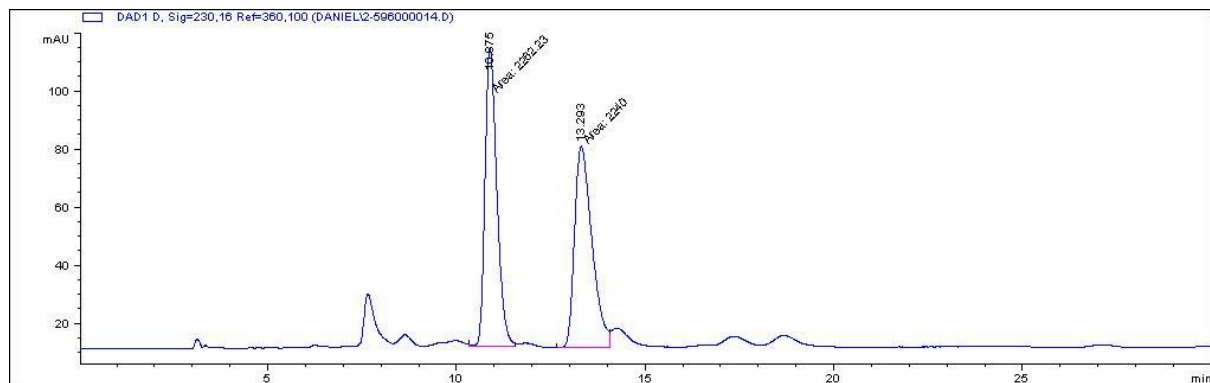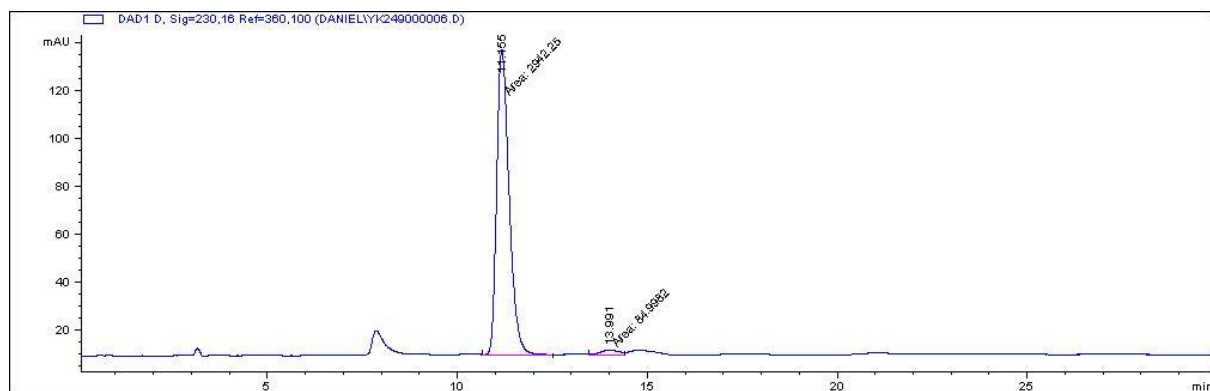

## HPLC Profile of 16

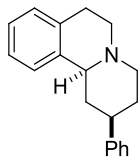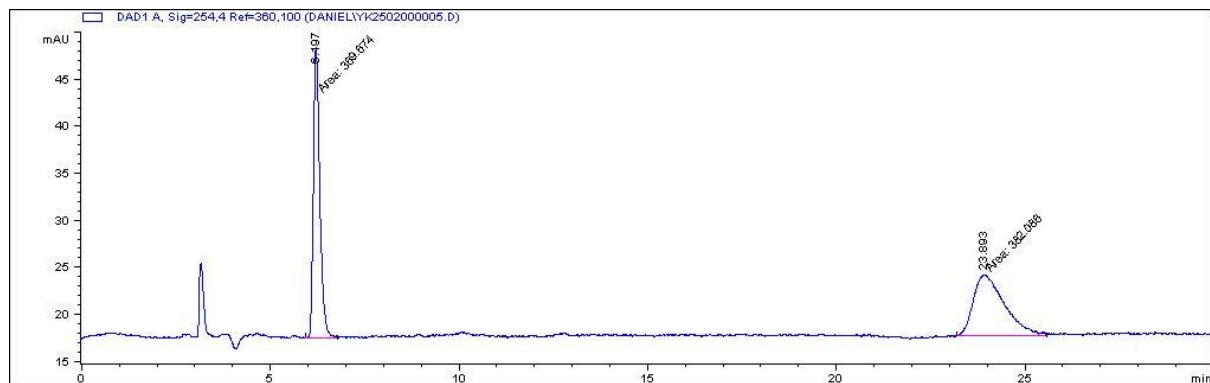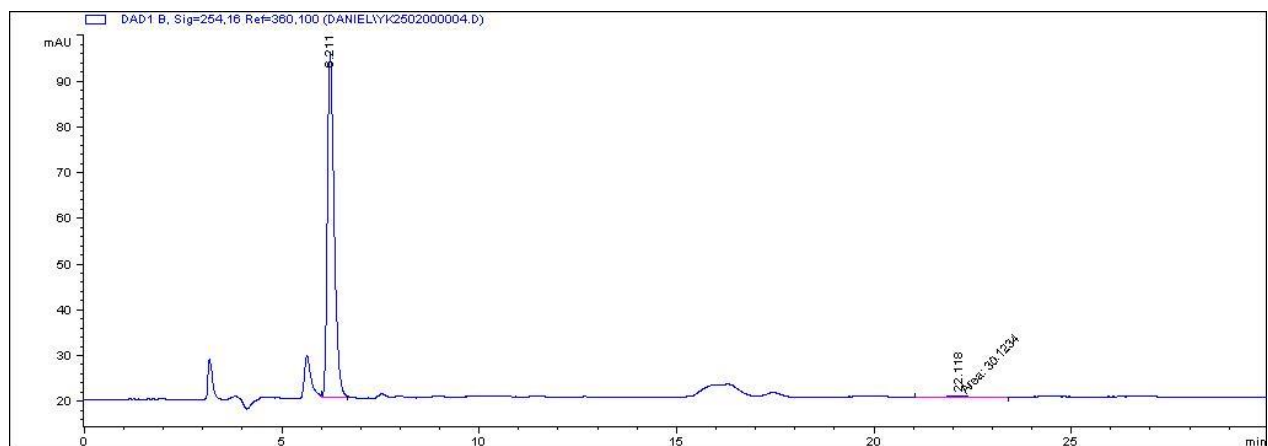

## HPLC Profile of 18

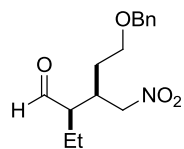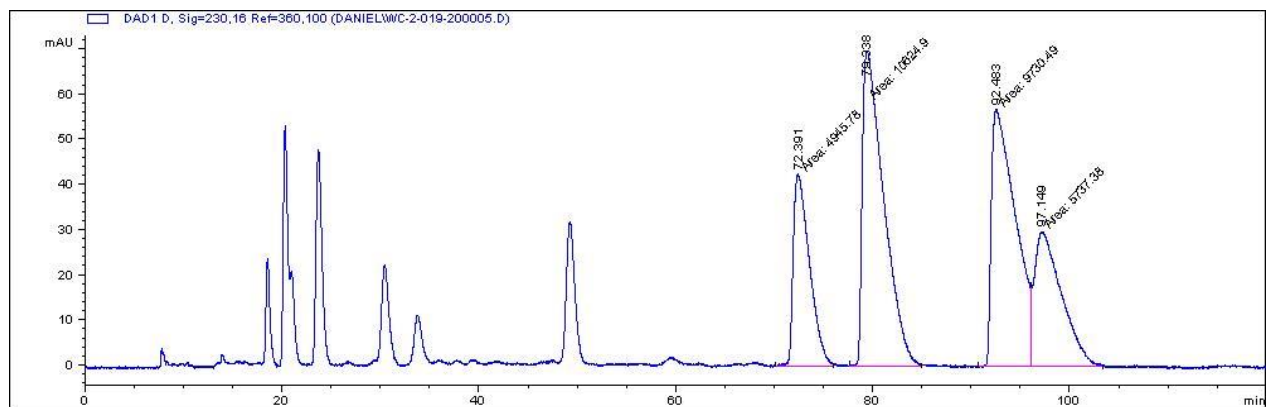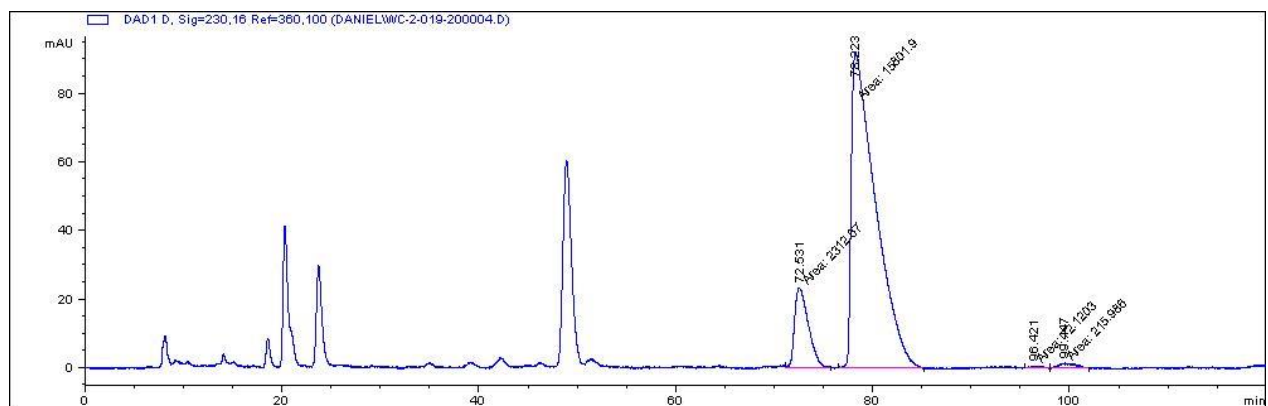

<sup>1</sup>H NMR of **5a** in CDCl<sub>3</sub>

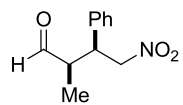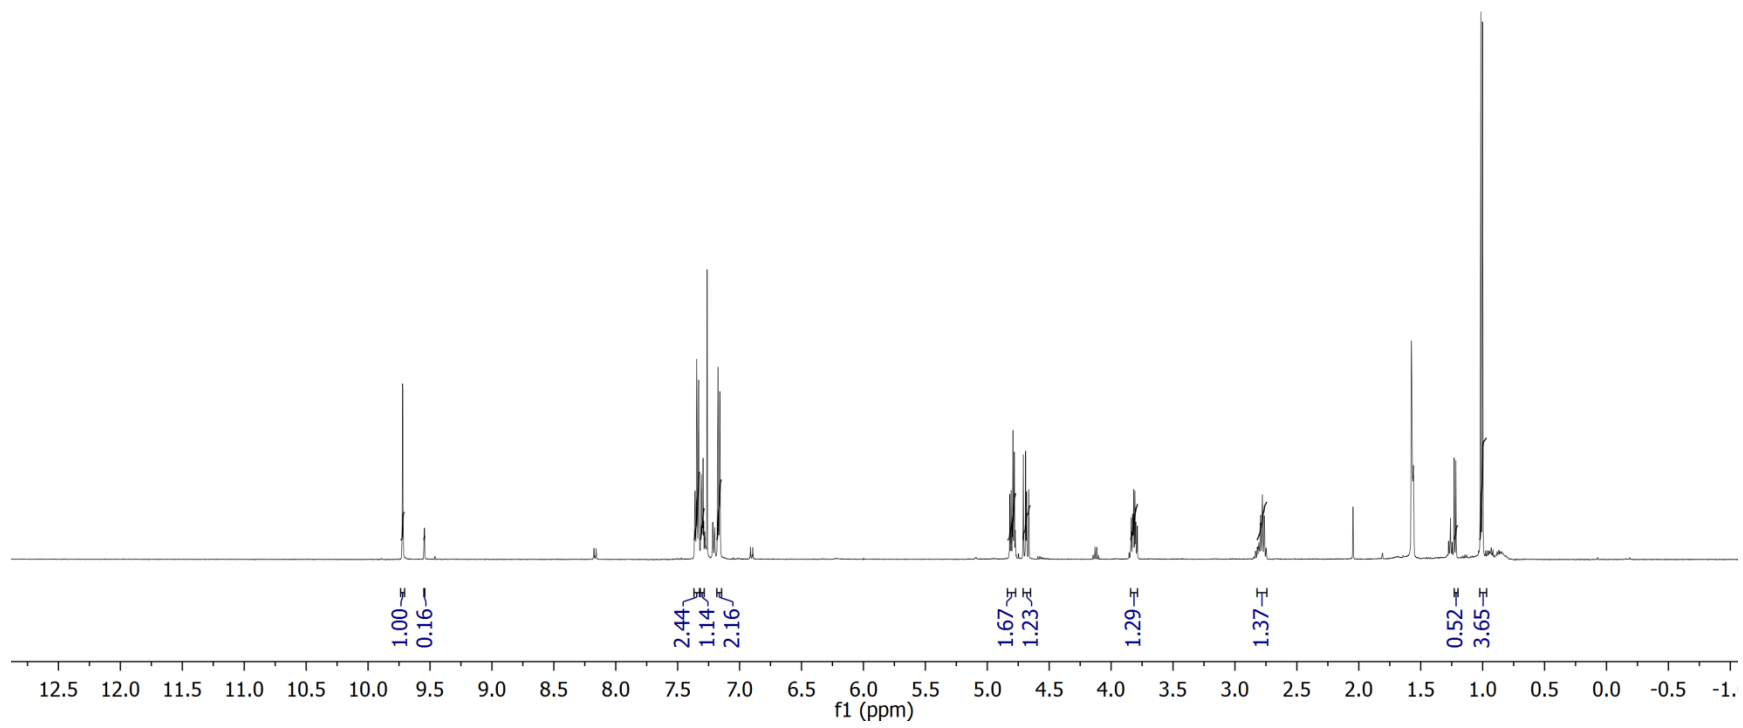

<sup>1</sup>H NMR of **5b** in CDCl<sub>3</sub>

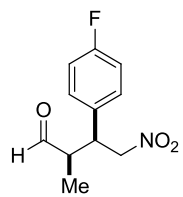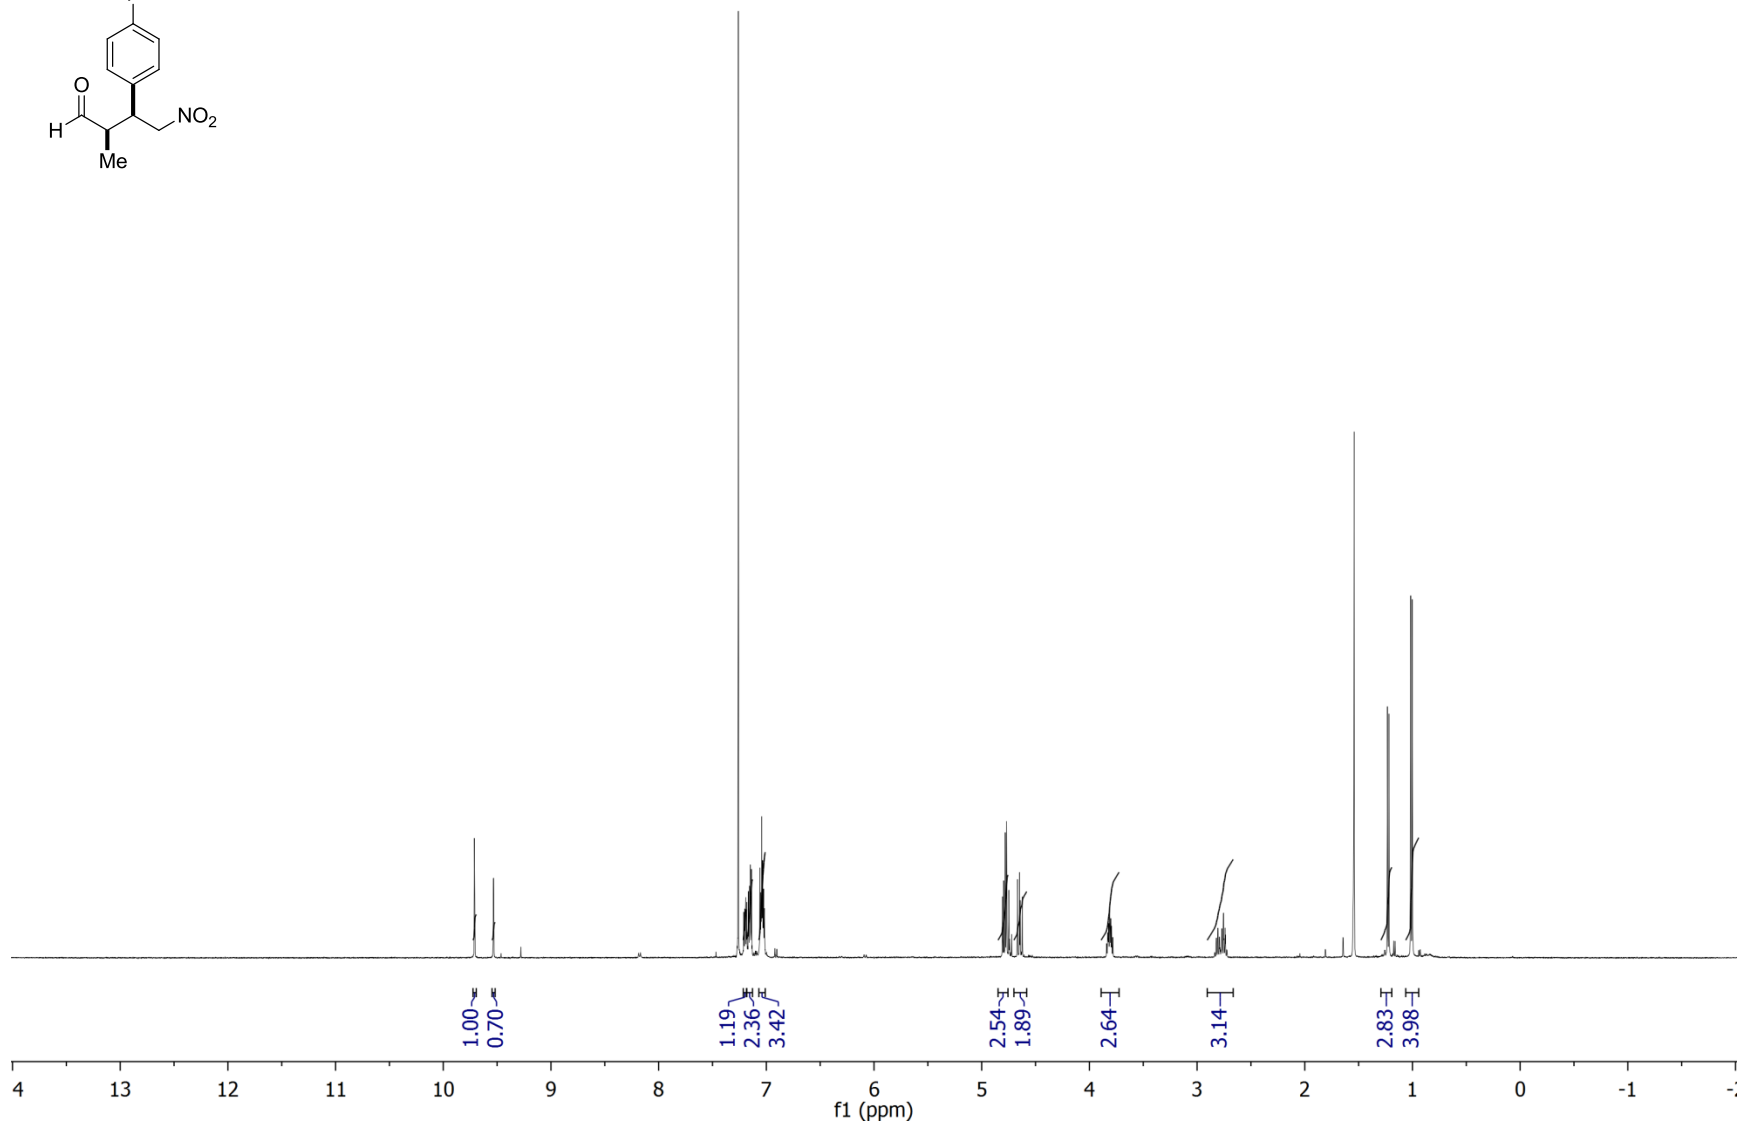



$^1\text{H}$  NMR of **5c** in  $\text{CDCl}_3$

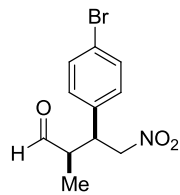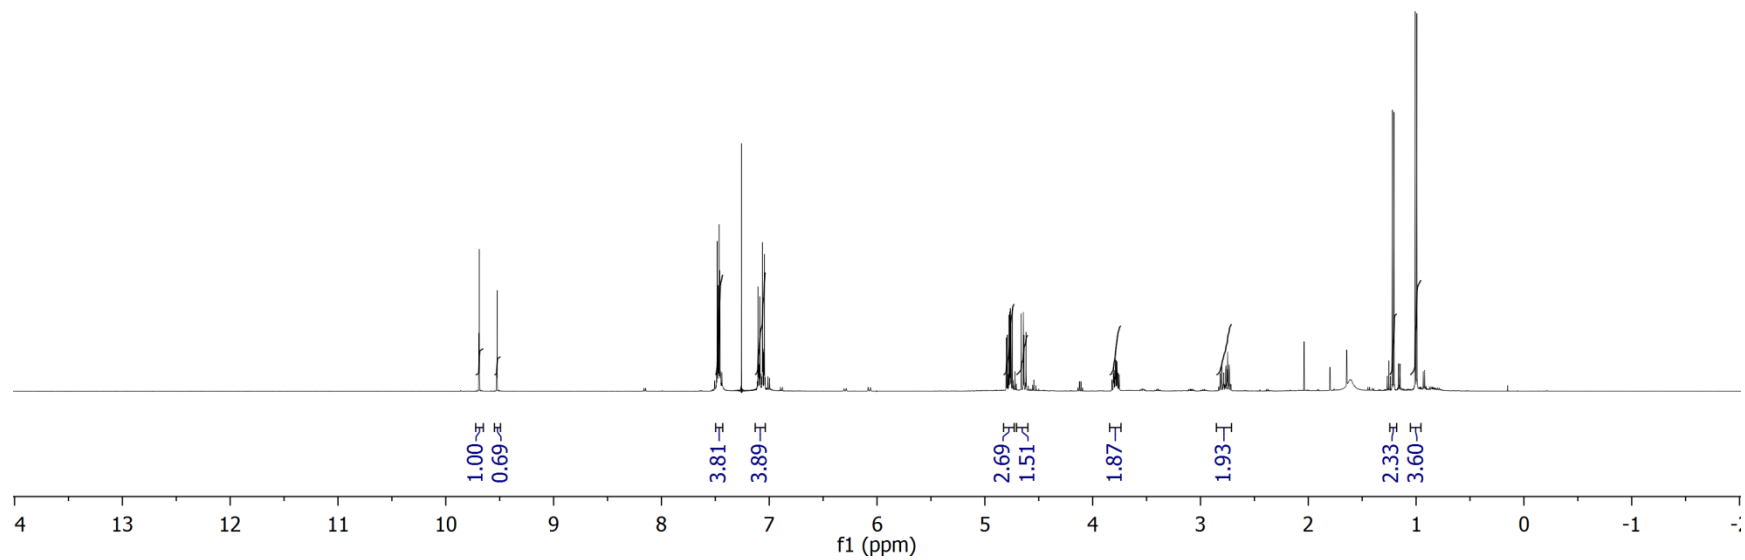

<sup>1</sup>H NMR of **5d** in CDCl<sub>3</sub>

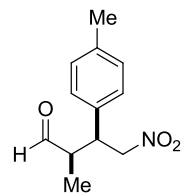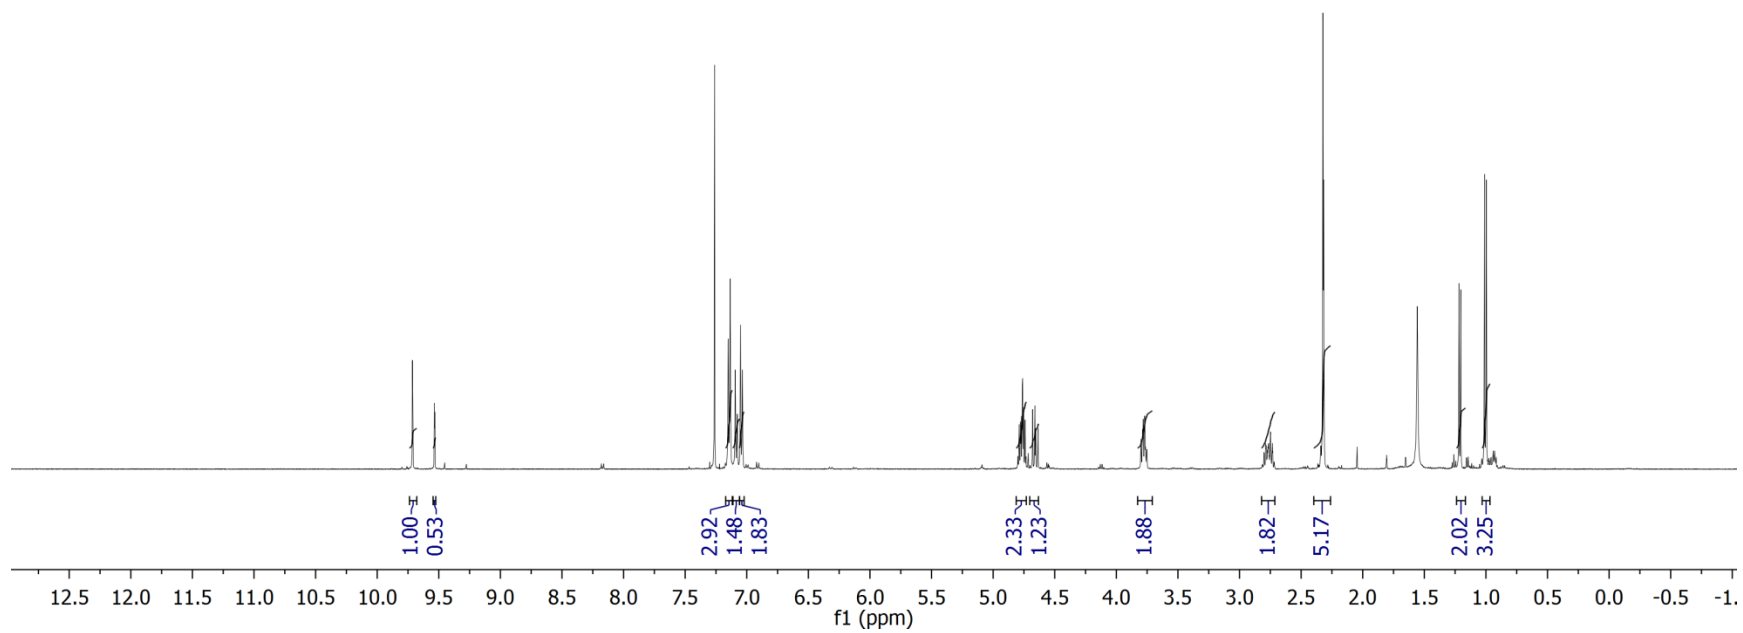

<sup>1</sup>H NMR of **5e** in CDCl<sub>3</sub>

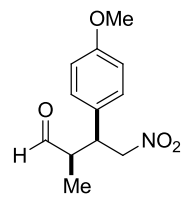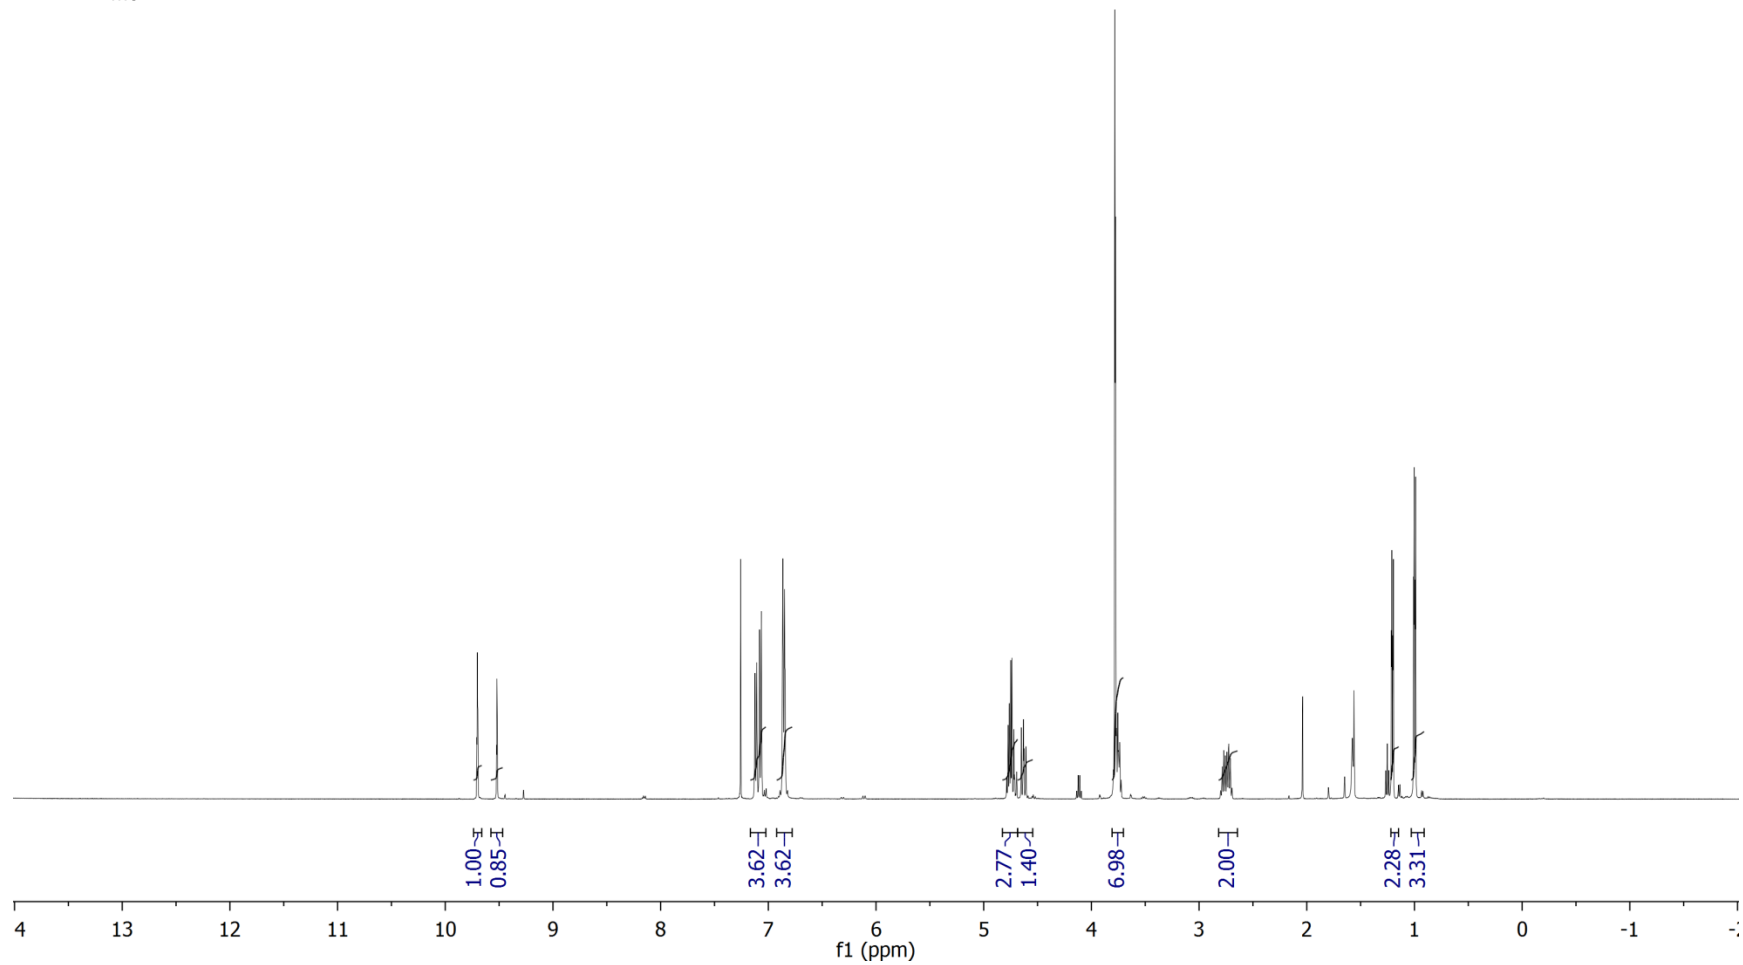

$^1\text{H}$  NMR of **5f** in  $\text{CDCl}_3$

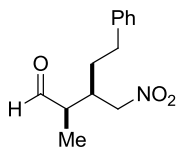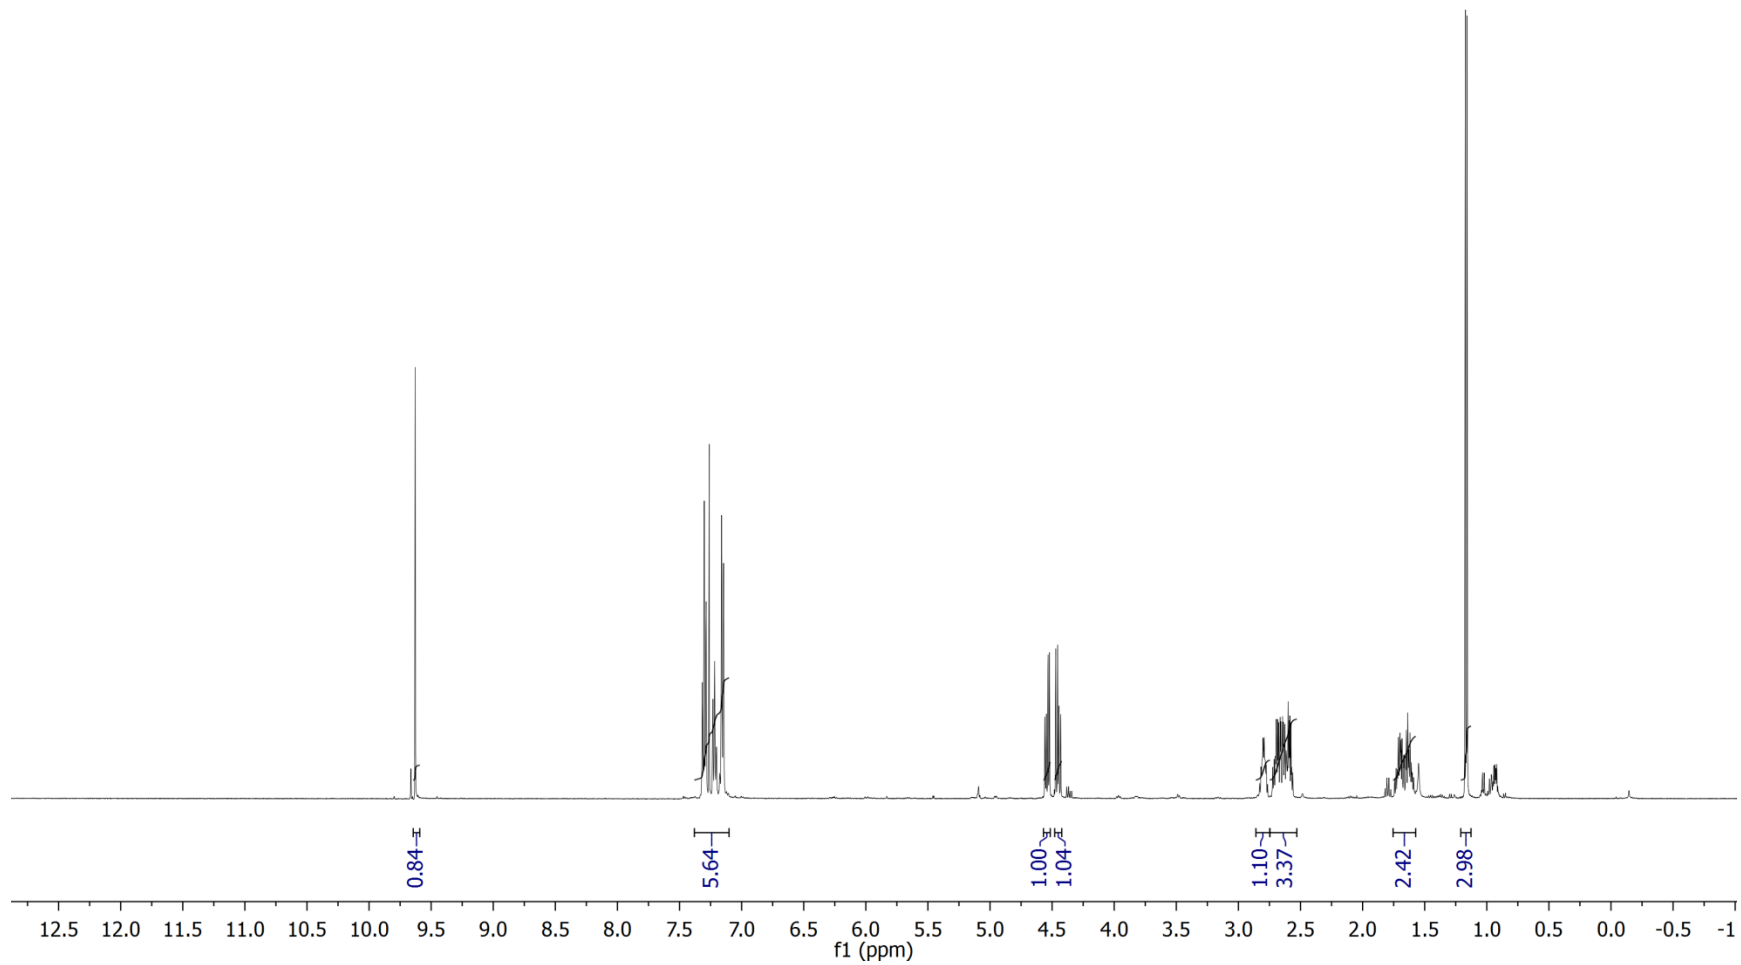

$^1\text{H}$  NMR of **5g** in  $\text{CDCl}_3$

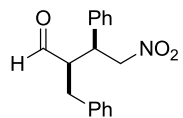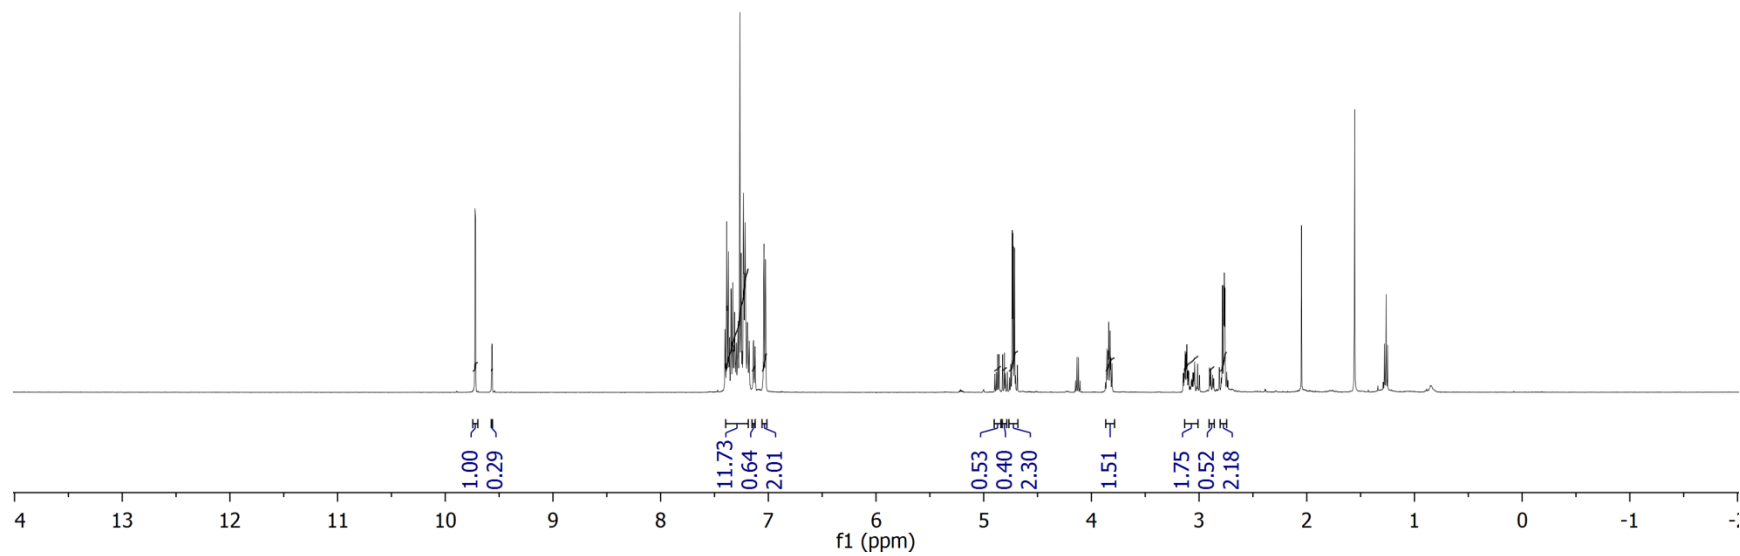

$^1\text{H}$  NMR of **5h** in  $\text{CDCl}_3$

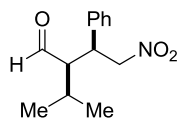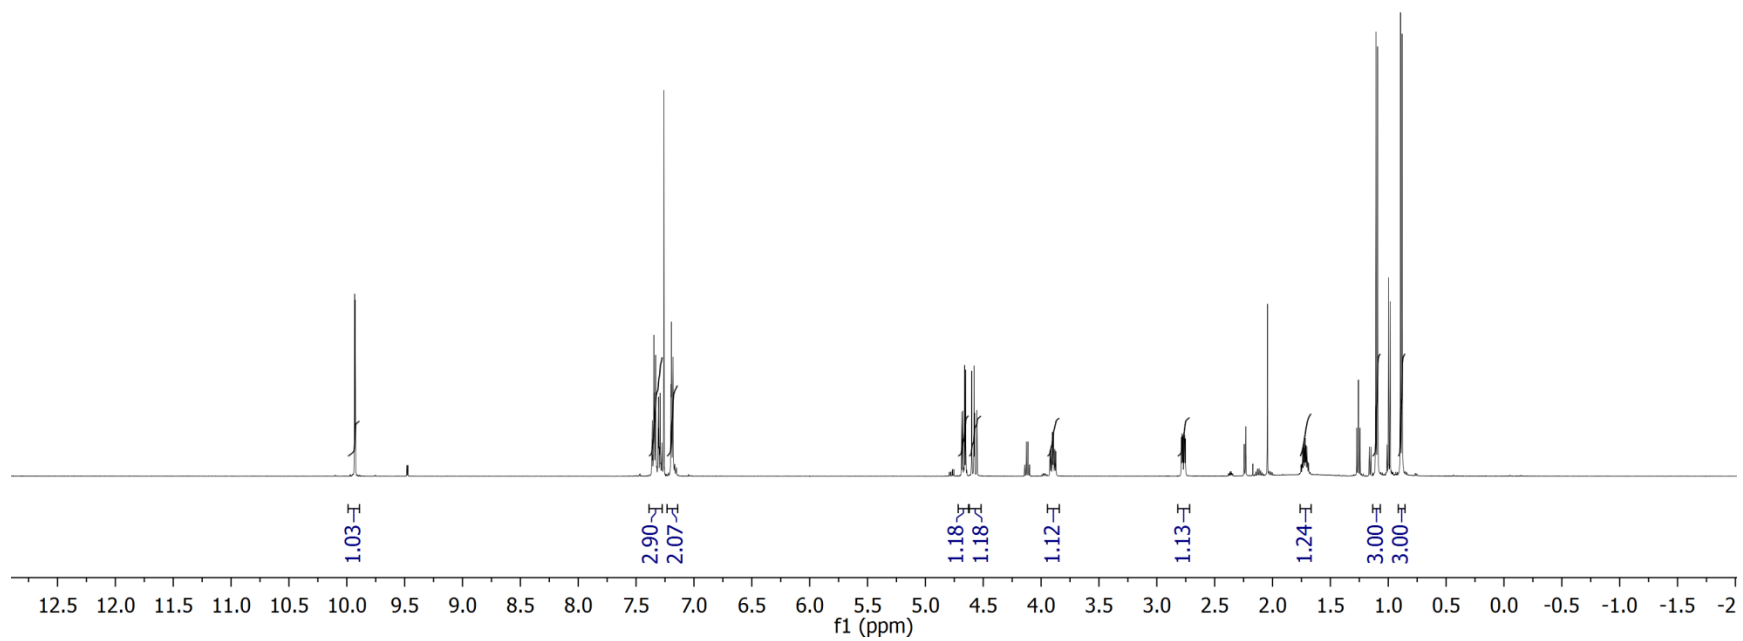

$^1\text{H}$  NMR of **5k** in  $\text{CDCl}_3$

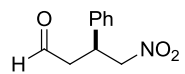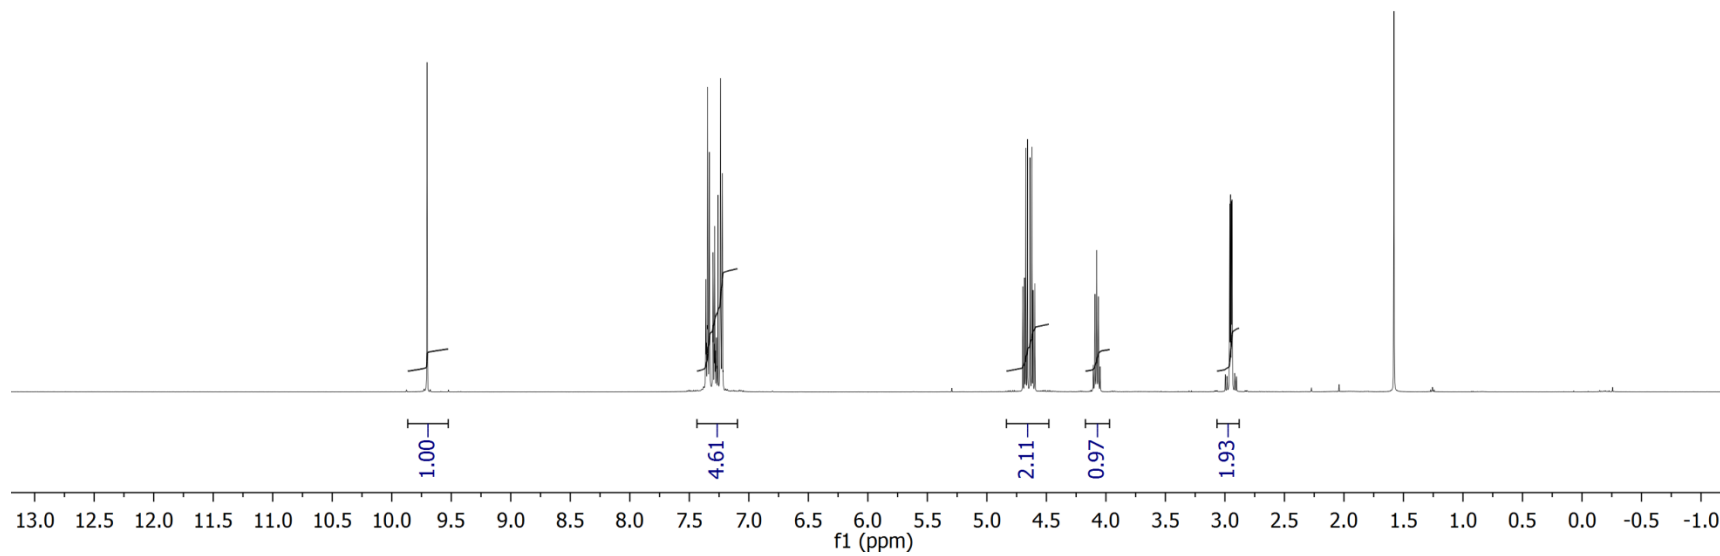

<sup>1</sup>H NMR of **5l** in CDCl<sub>3</sub>

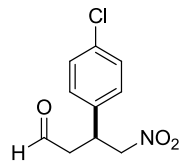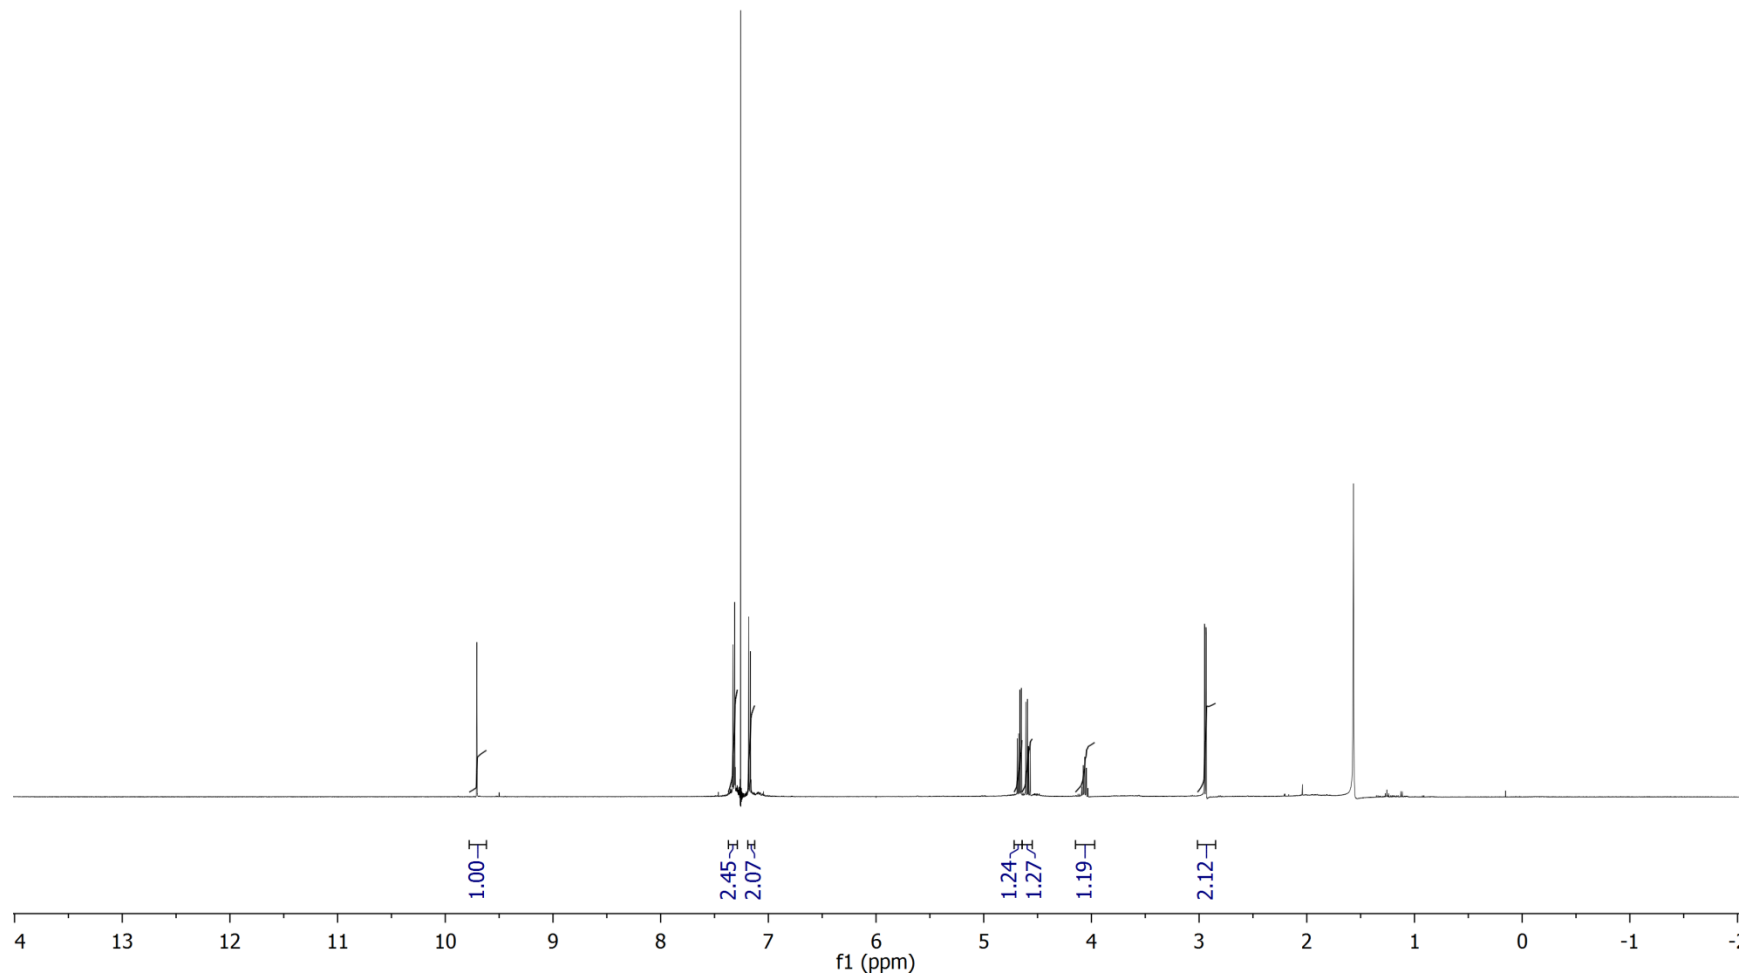



<sup>1</sup>H NMR of **5m** in CDCl<sub>3</sub>

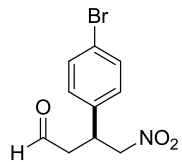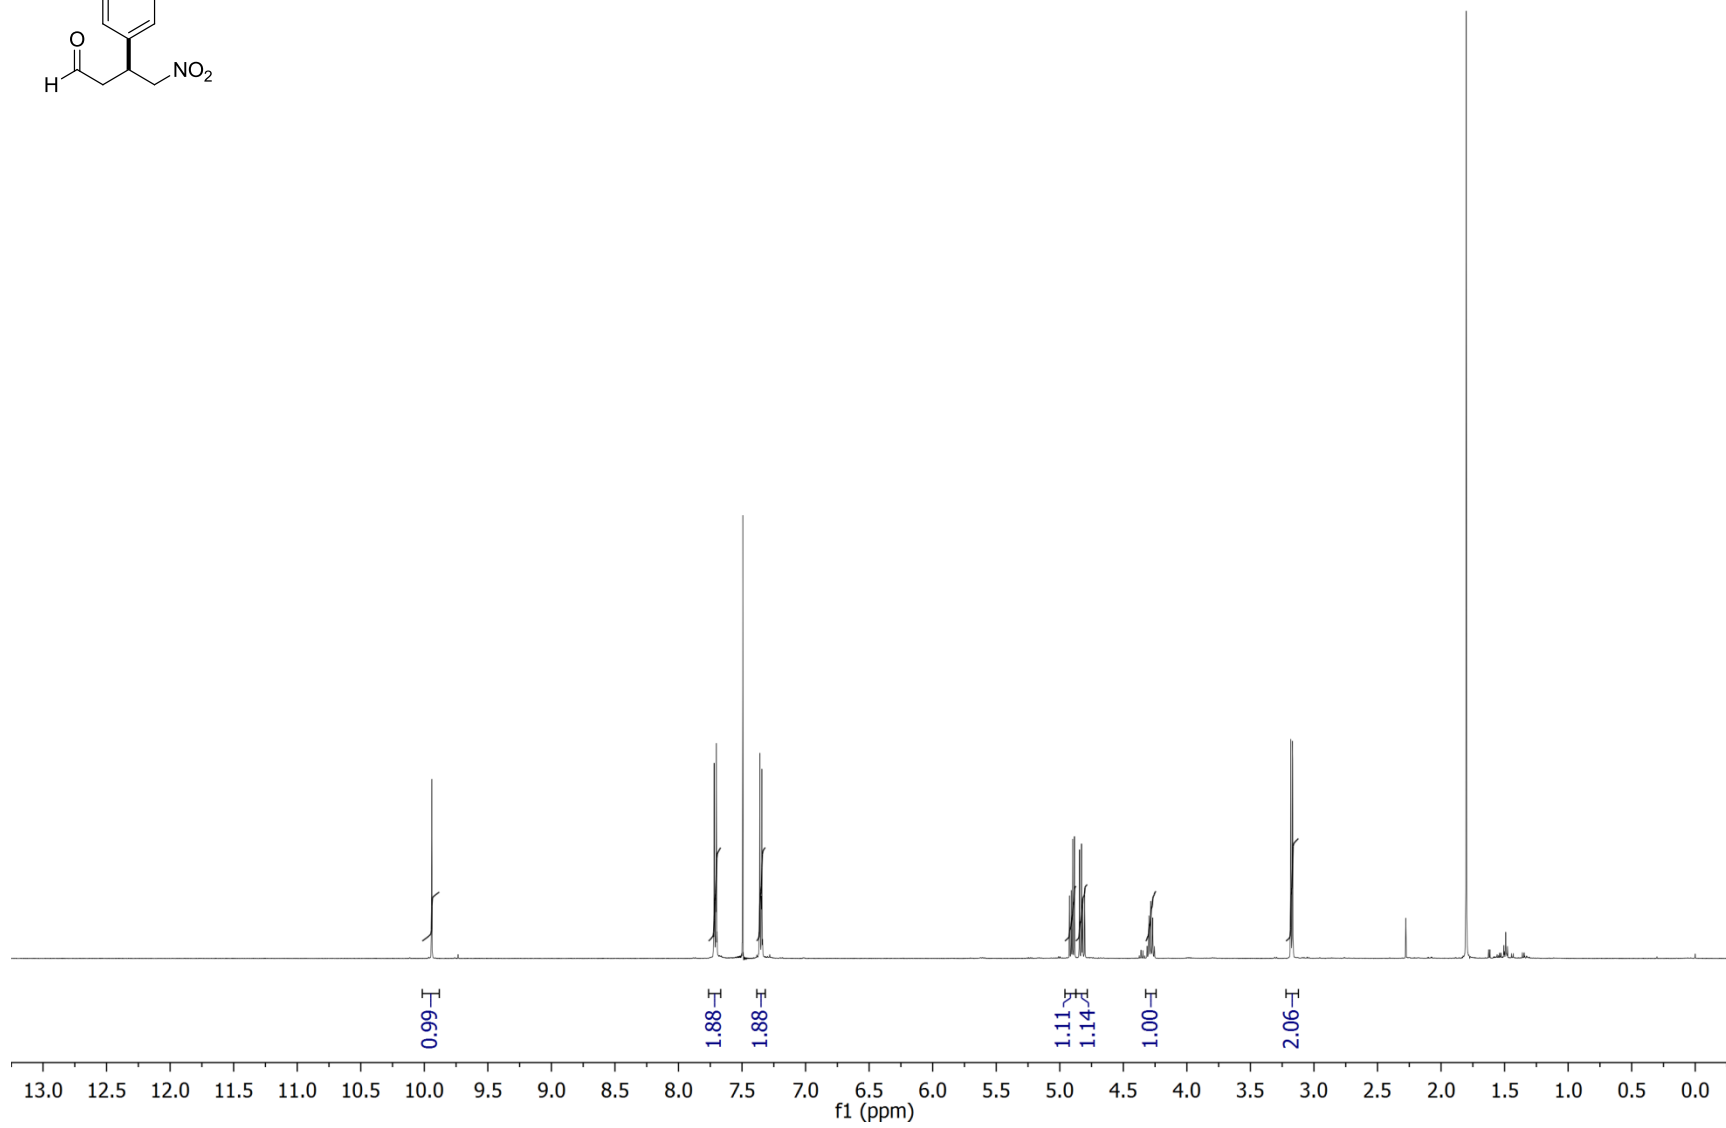

<sup>1</sup>H NMR of **5n** in CDCl<sub>3</sub>

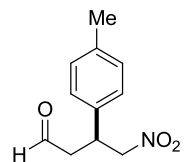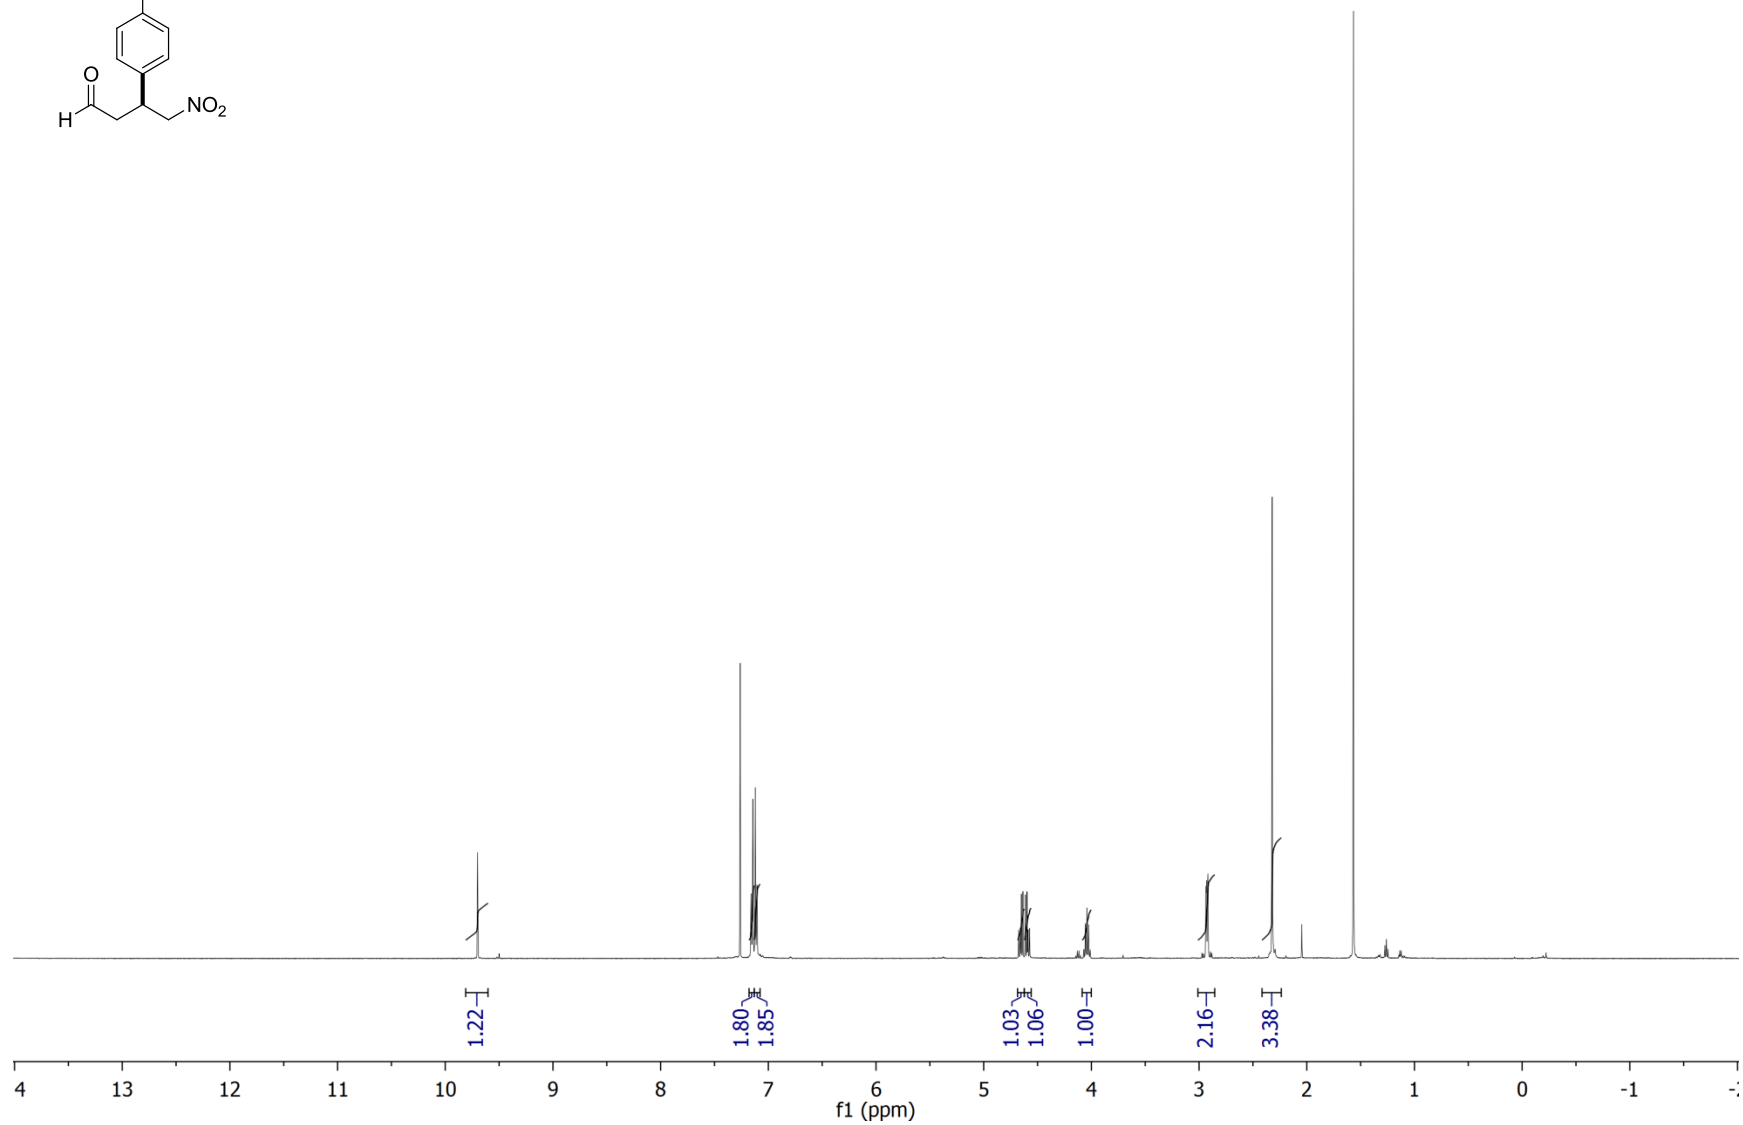

<sup>1</sup>H NMR of **5o** in CDCl<sub>3</sub>

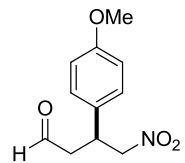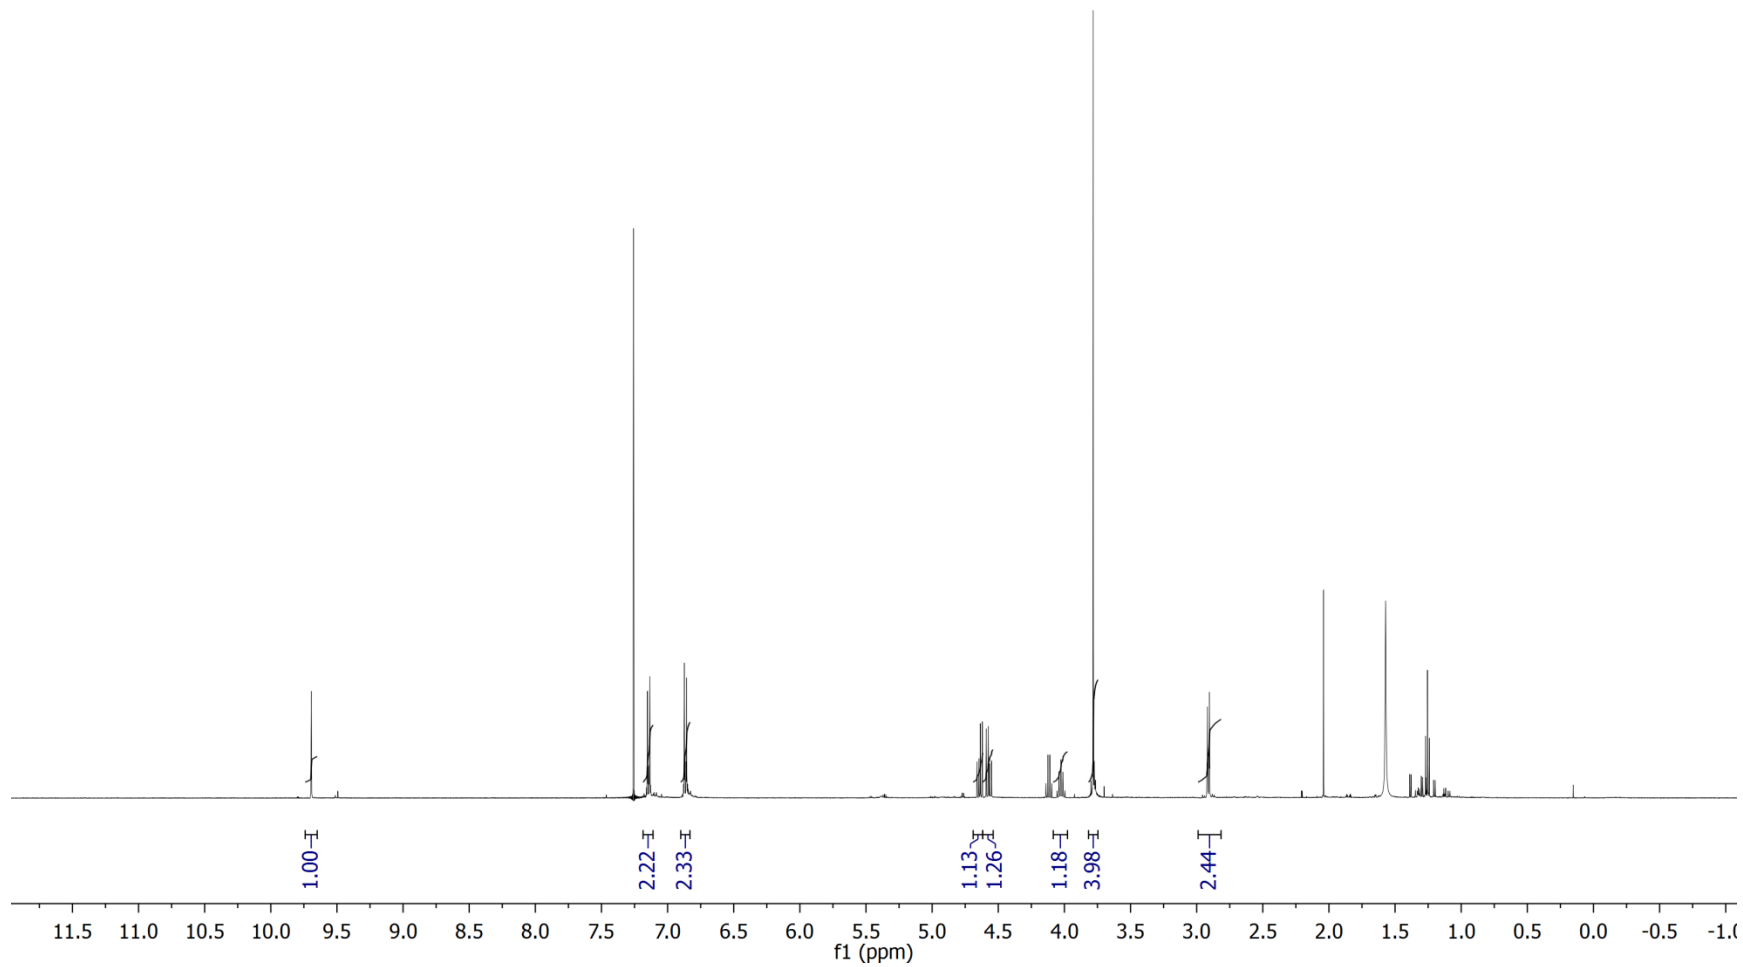

<sup>1</sup>H NMR of **5p** in CDCl<sub>3</sub>

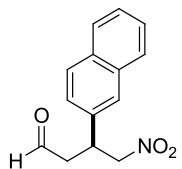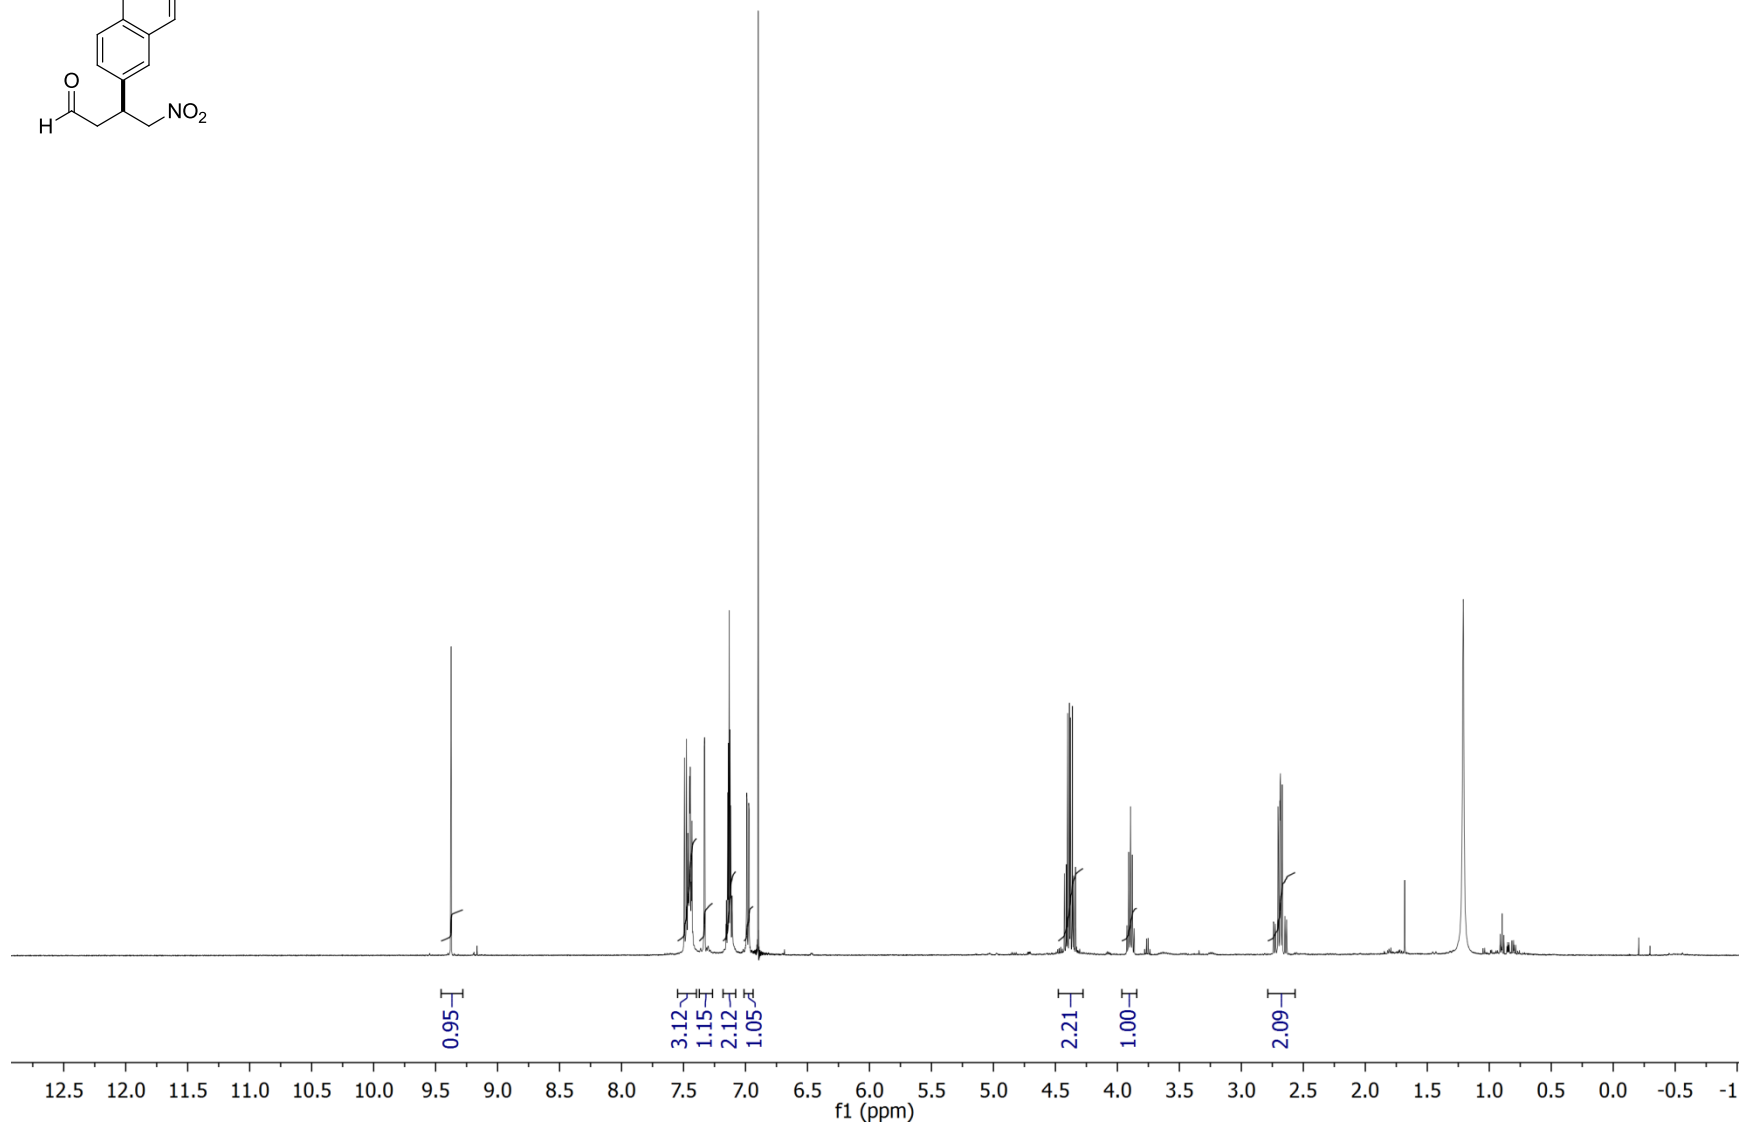

<sup>1</sup>H NMR of **5q** in CDCl<sub>3</sub>

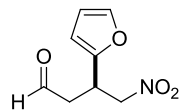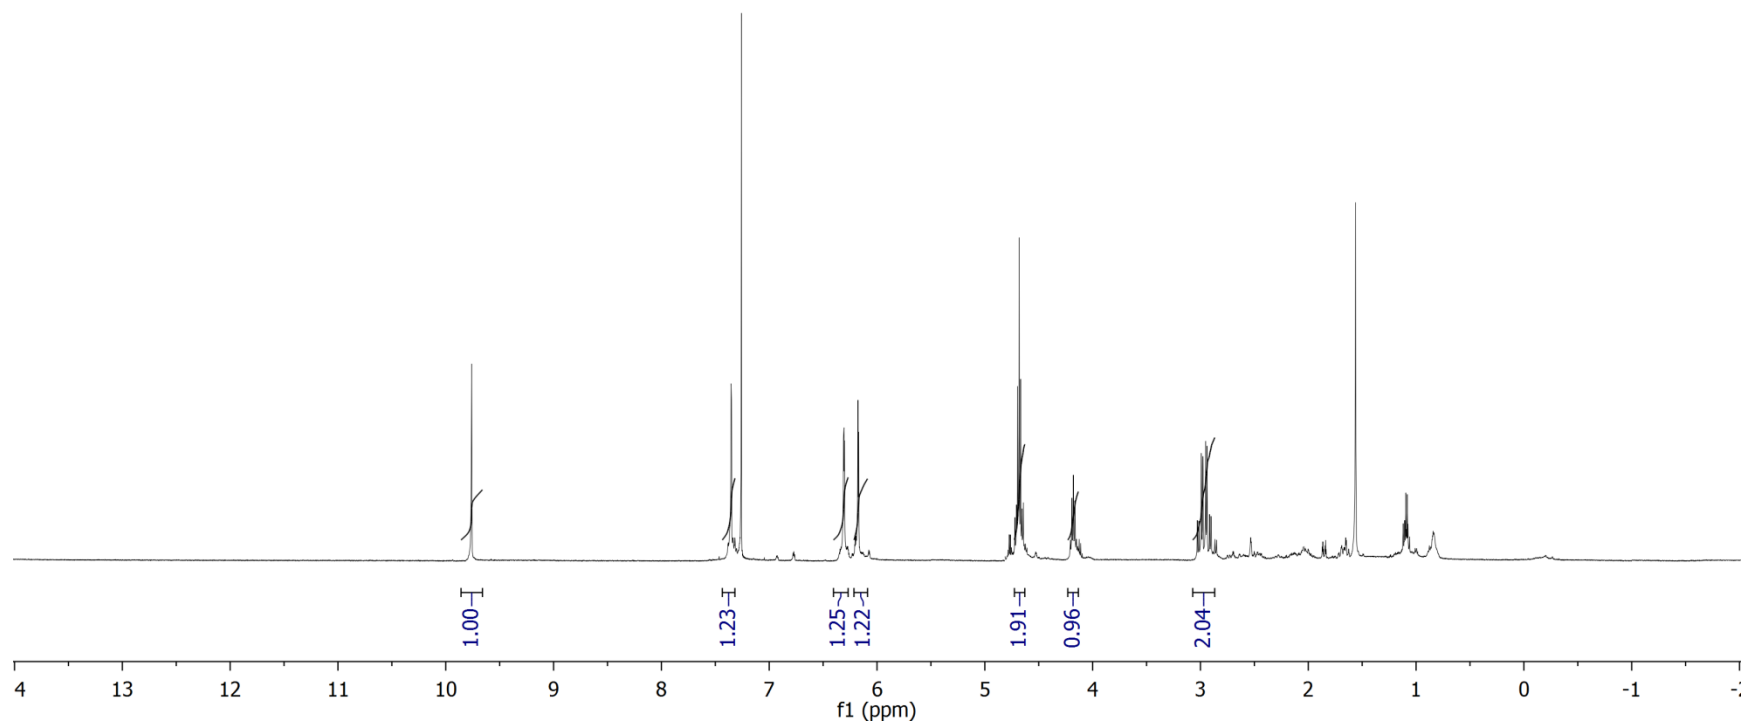

$^1\text{H}$  NMR of **6a** in  $\text{CDCl}_3$

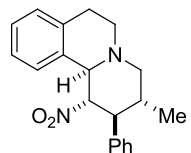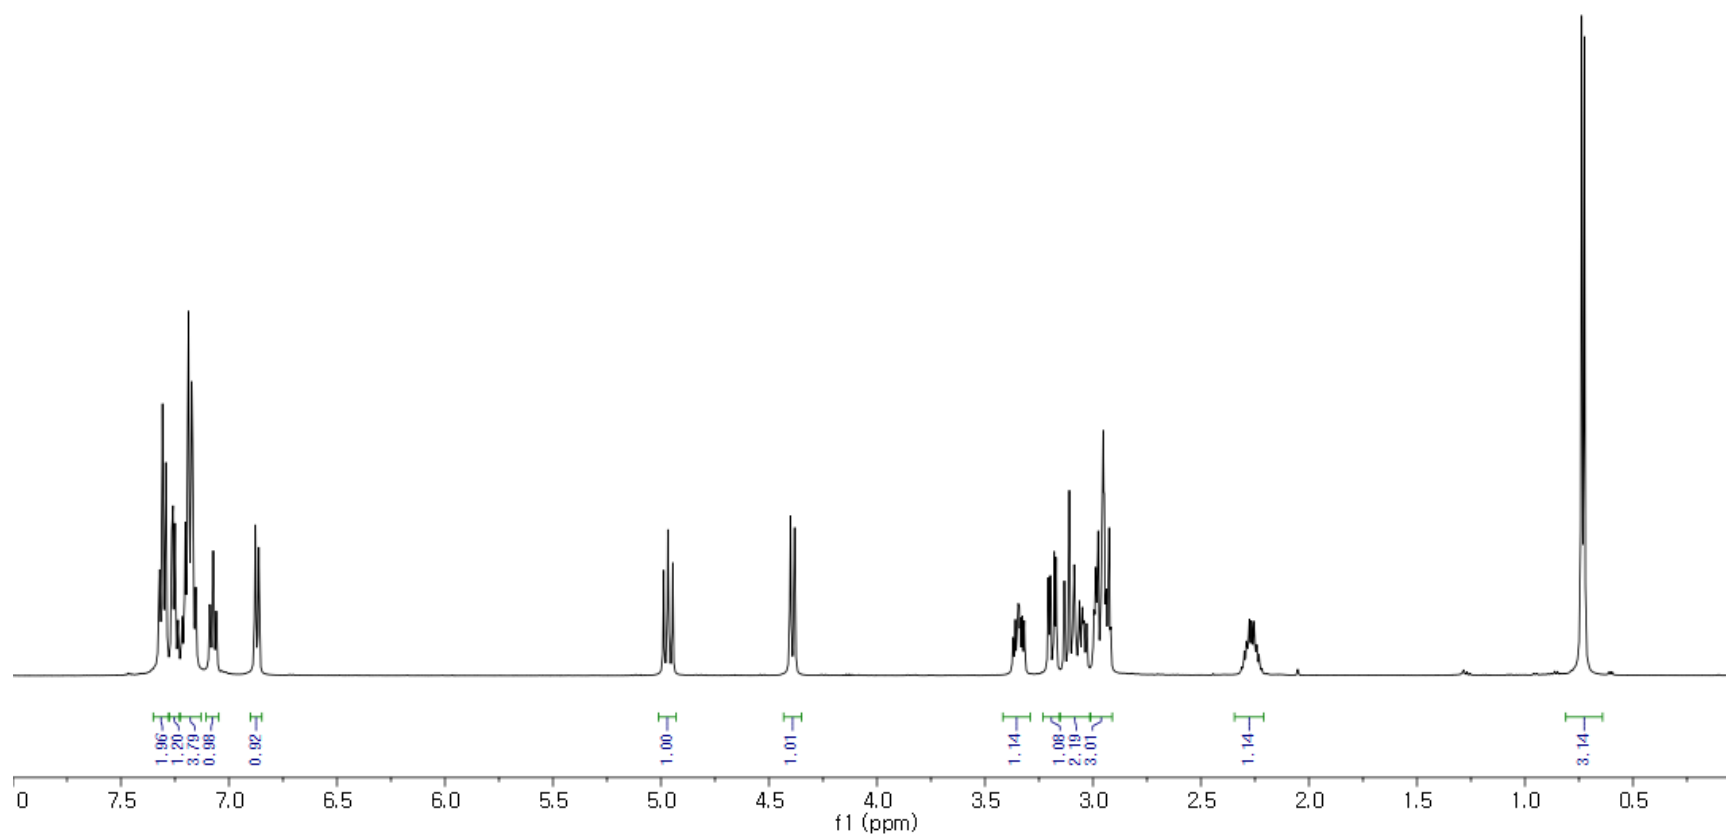

$^{13}\text{C}$  NMR of **6a** in  $\text{CDCl}_3$

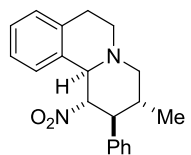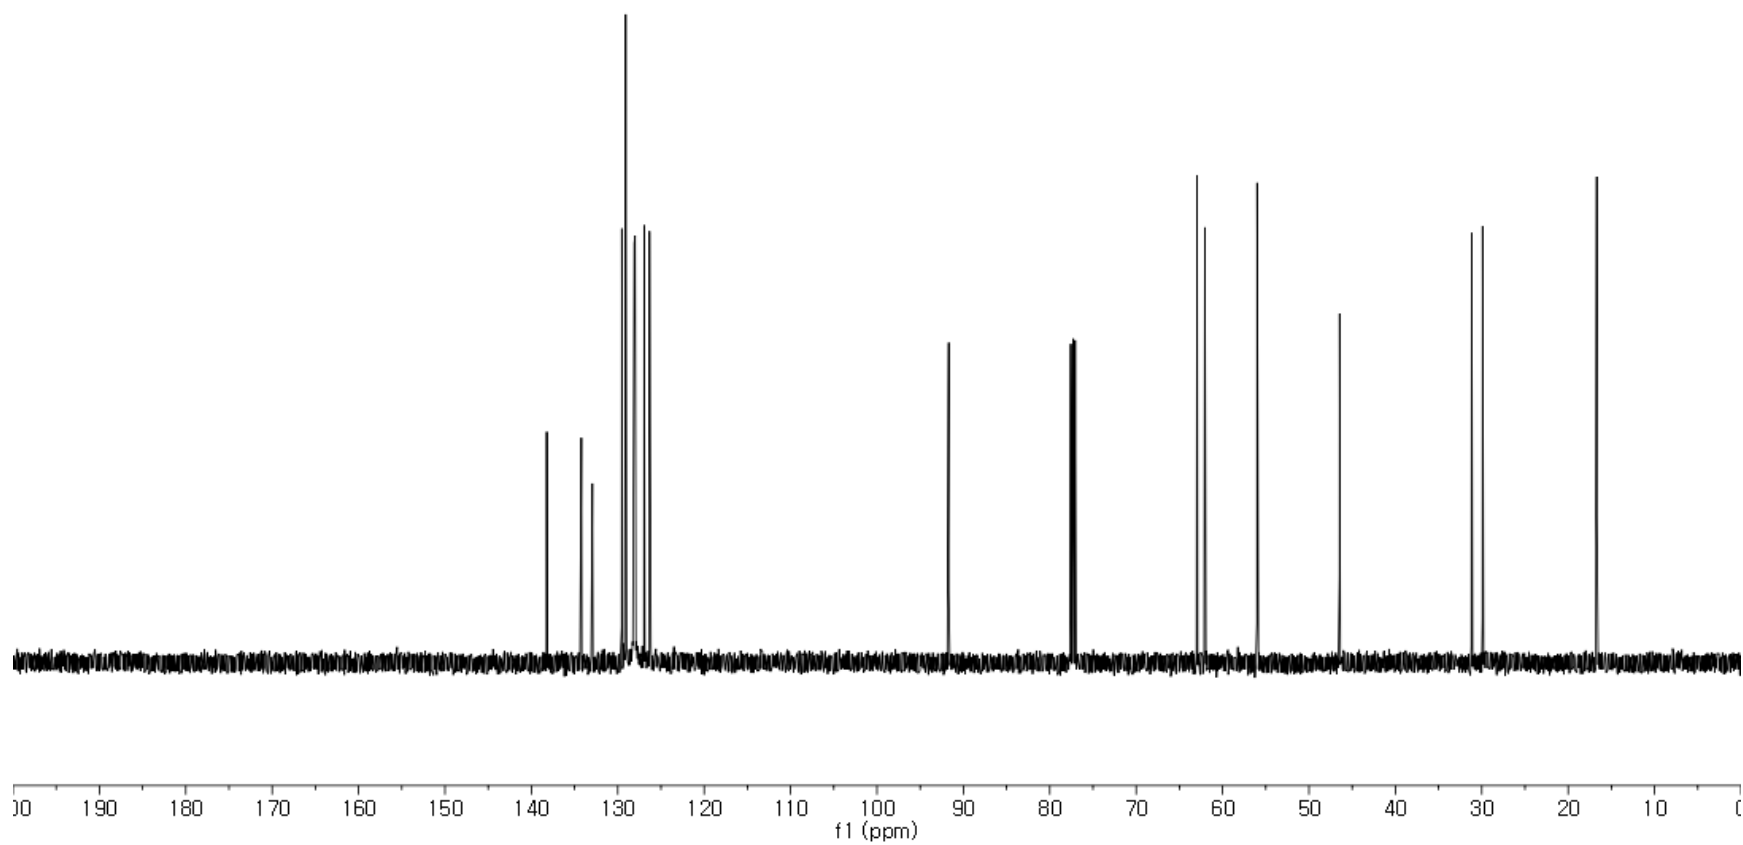

<sup>1</sup>H NMR of **7a** in CDCl<sub>3</sub>

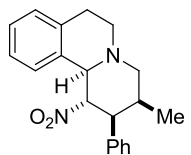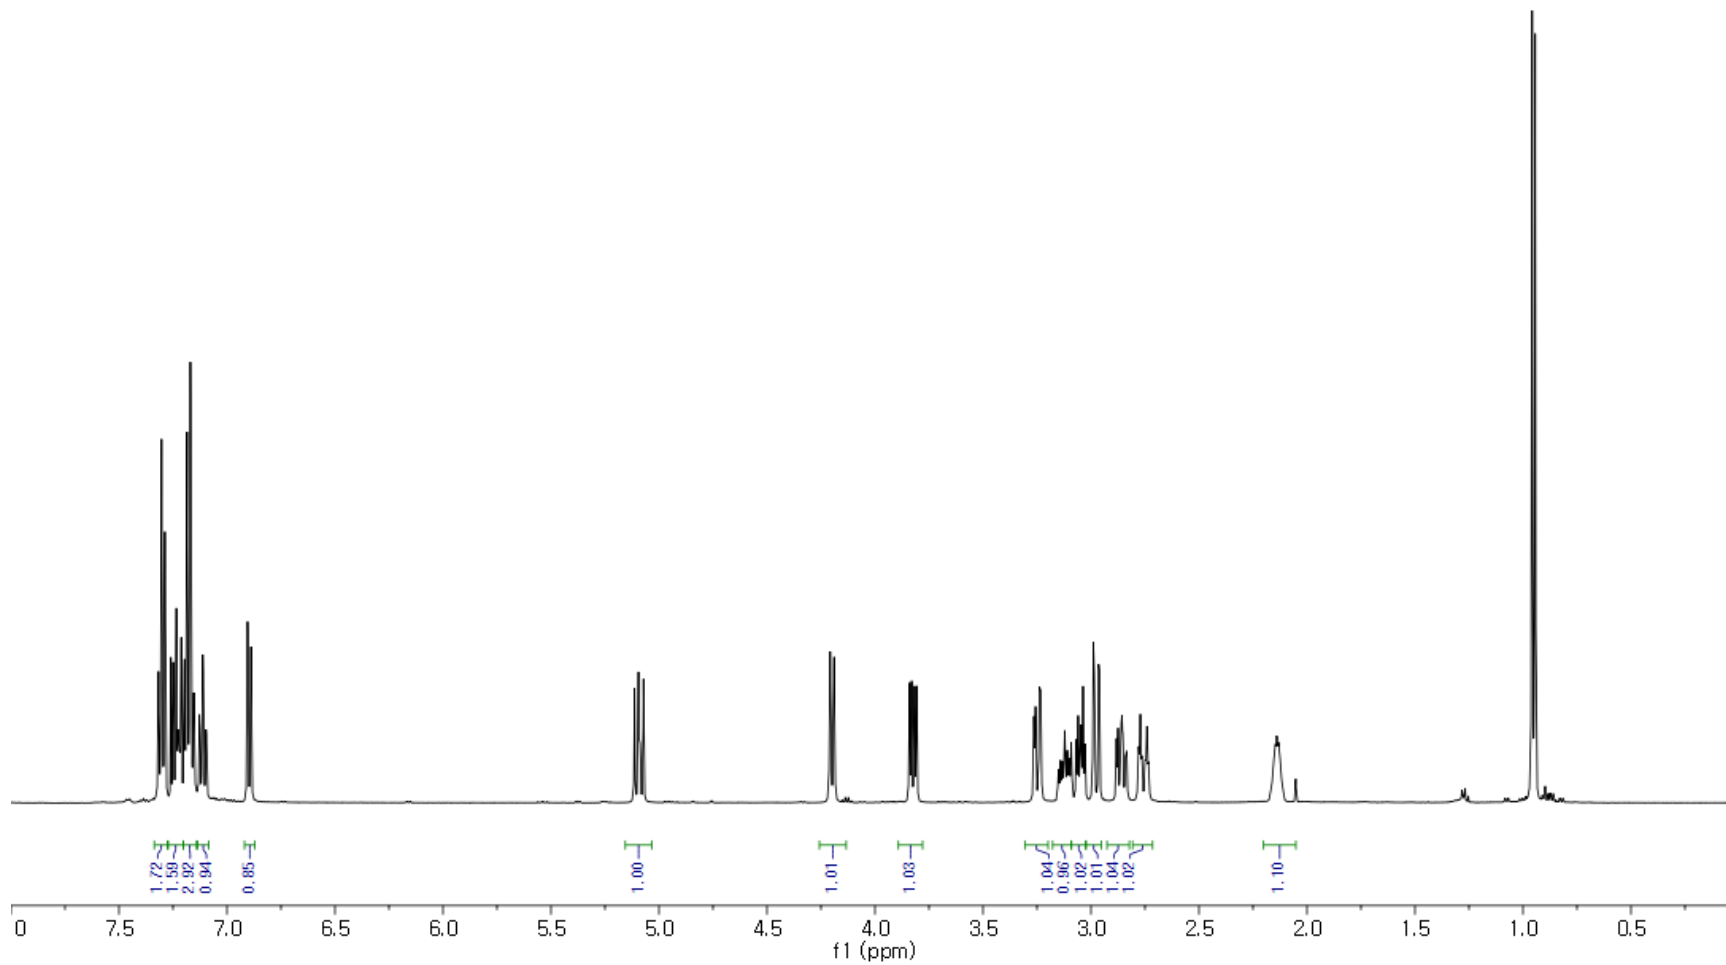



$^{13}\text{C}$  NMR of **7a** in  $\text{CDCl}_3$

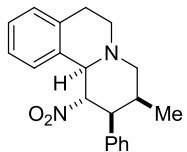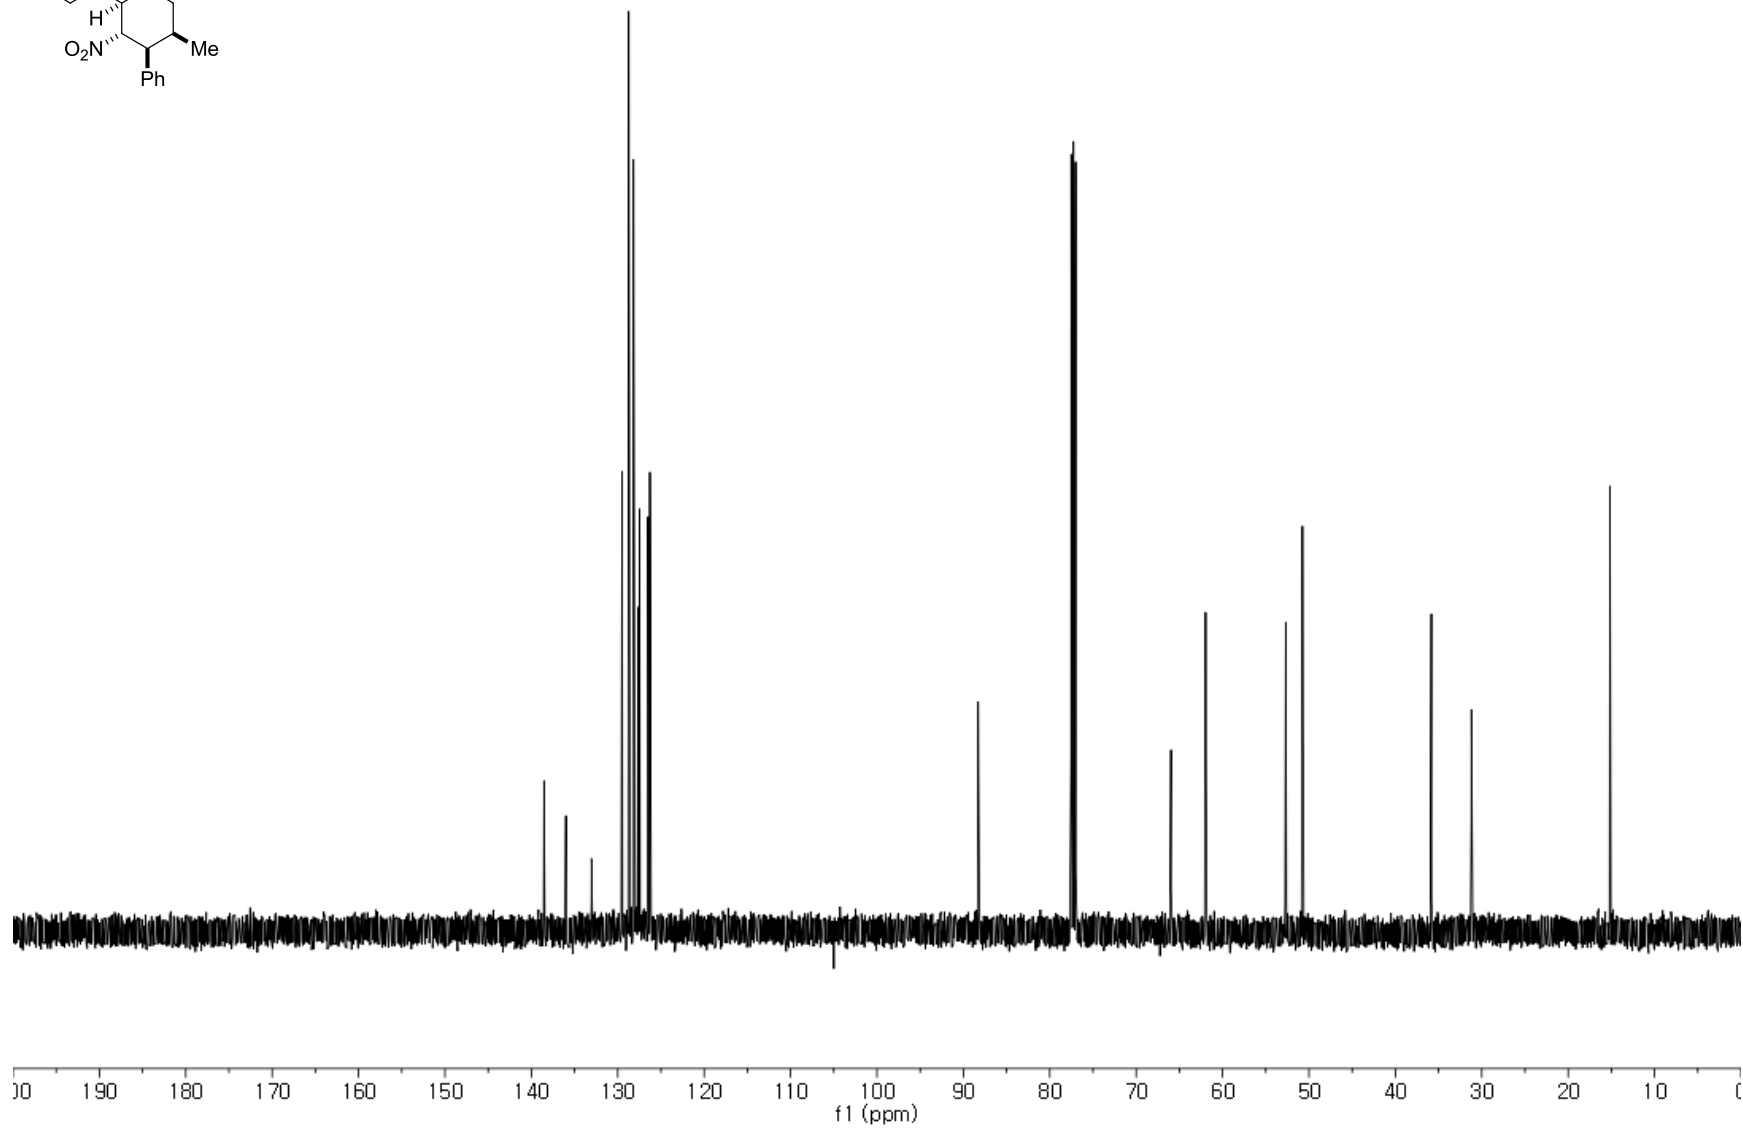

$^1\text{H}$  NMR of **6b** in  $\text{CDCl}_3$

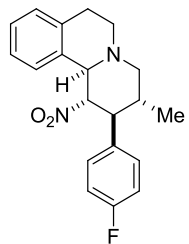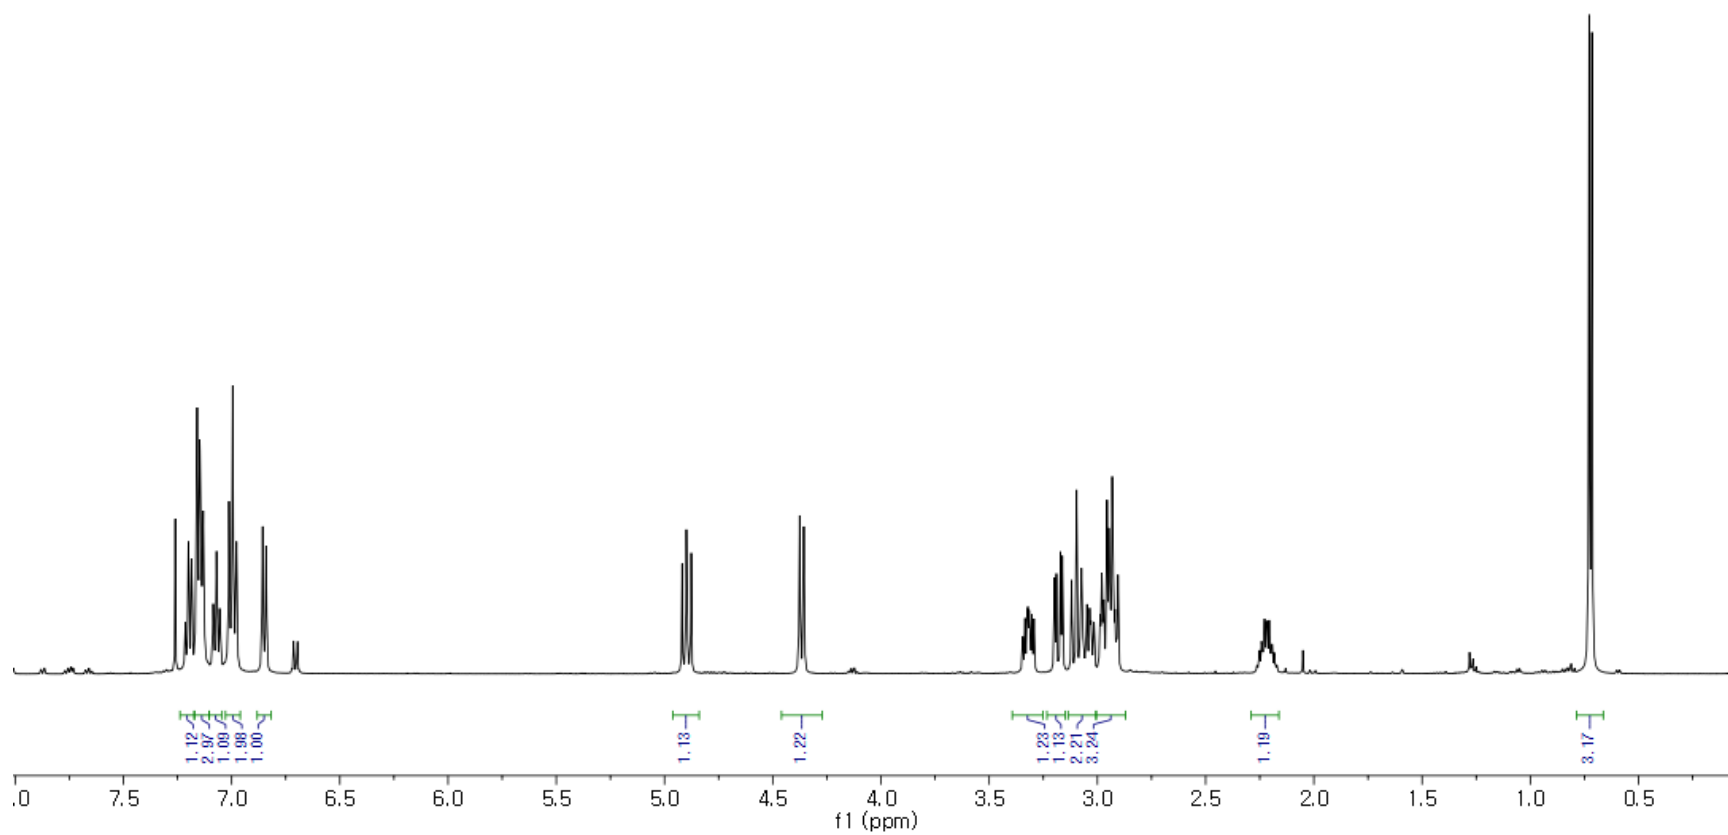

$^{13}\text{C}$  NMR of **6b** in  $\text{CDCl}_3$

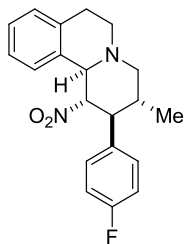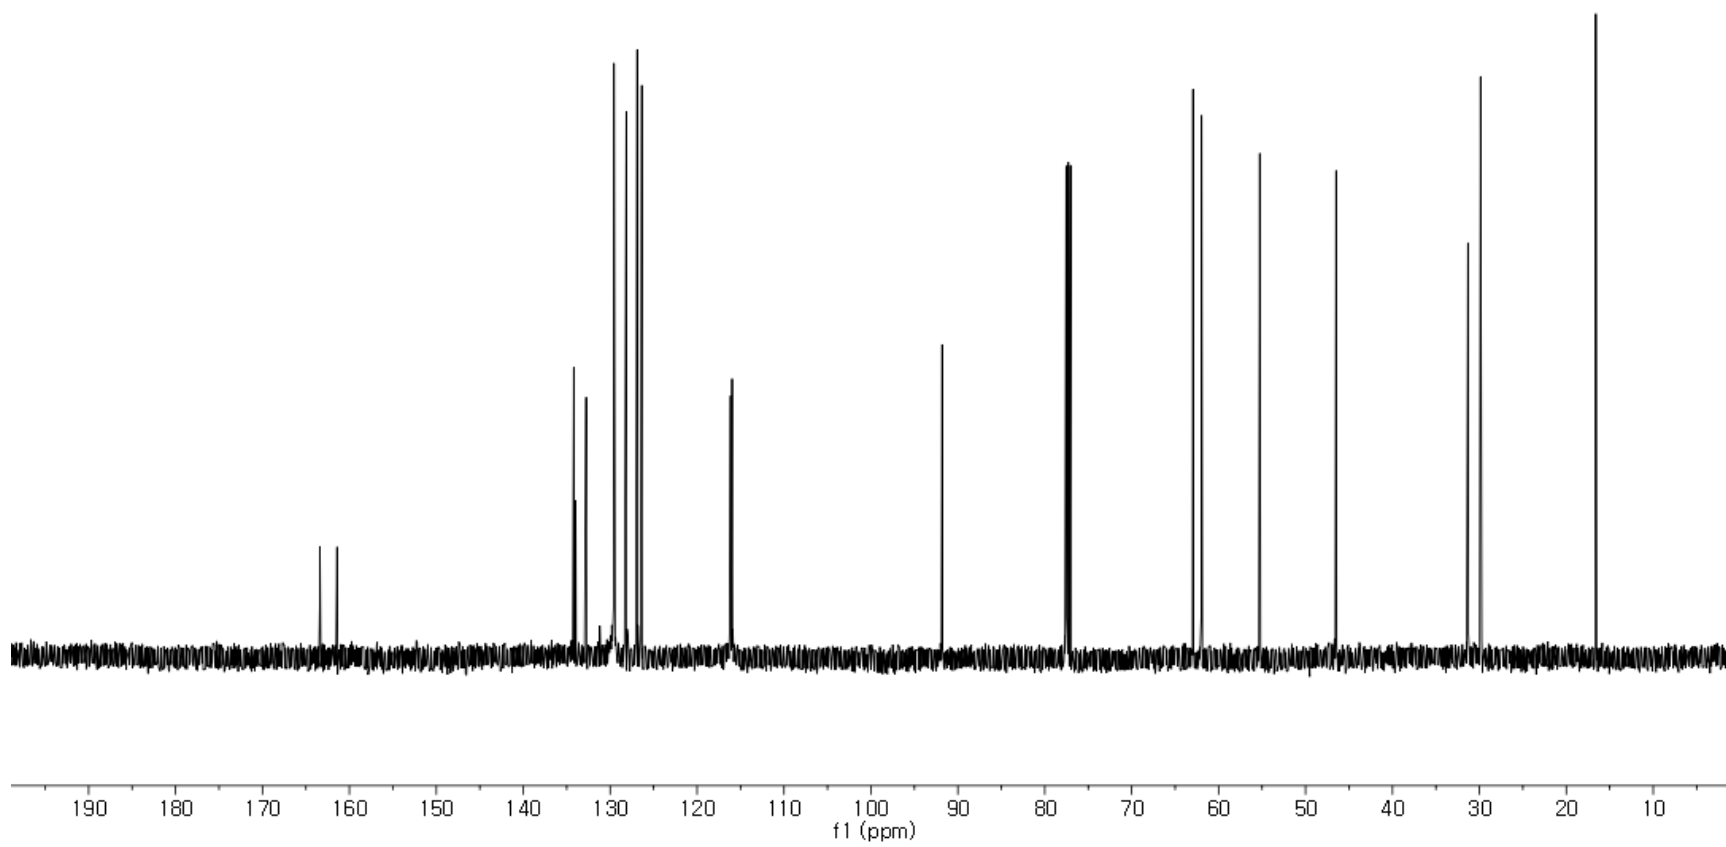

$^1\text{H}$  NMR of **7b** in  $\text{CDCl}_3$

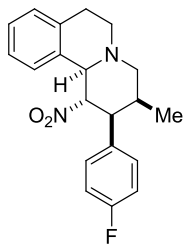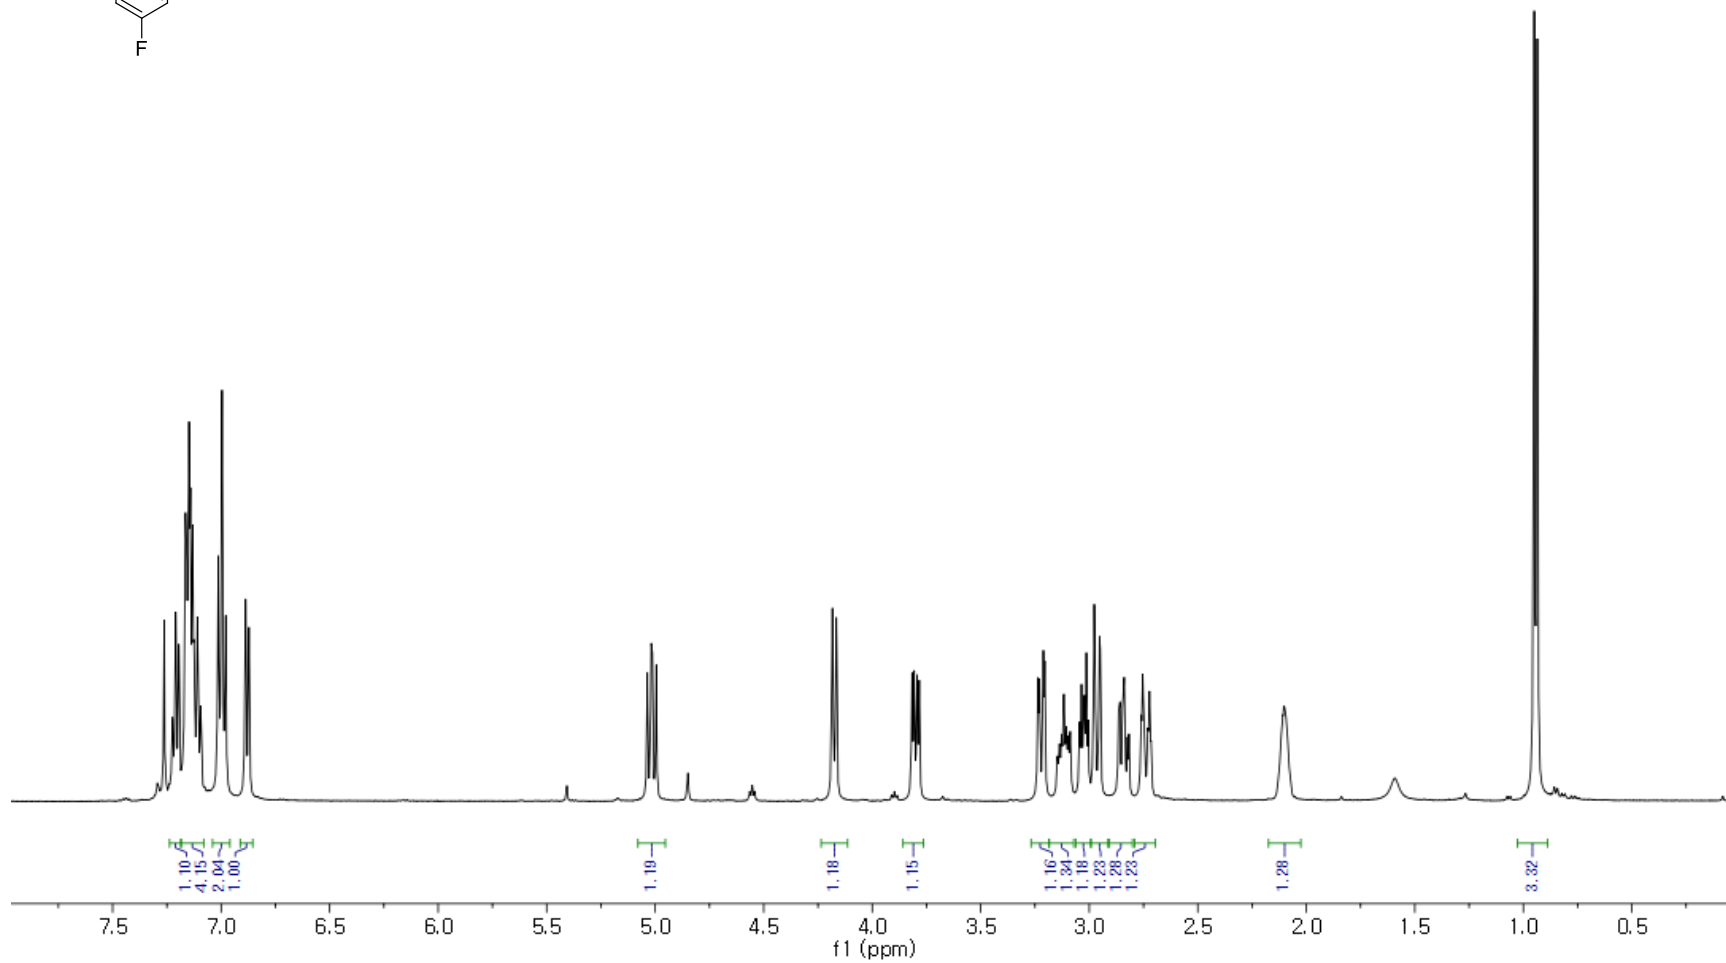

$^{13}\text{C}$  NMR of **7b** in  $\text{CDCl}_3$

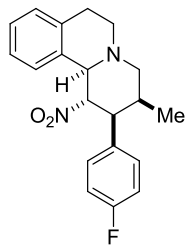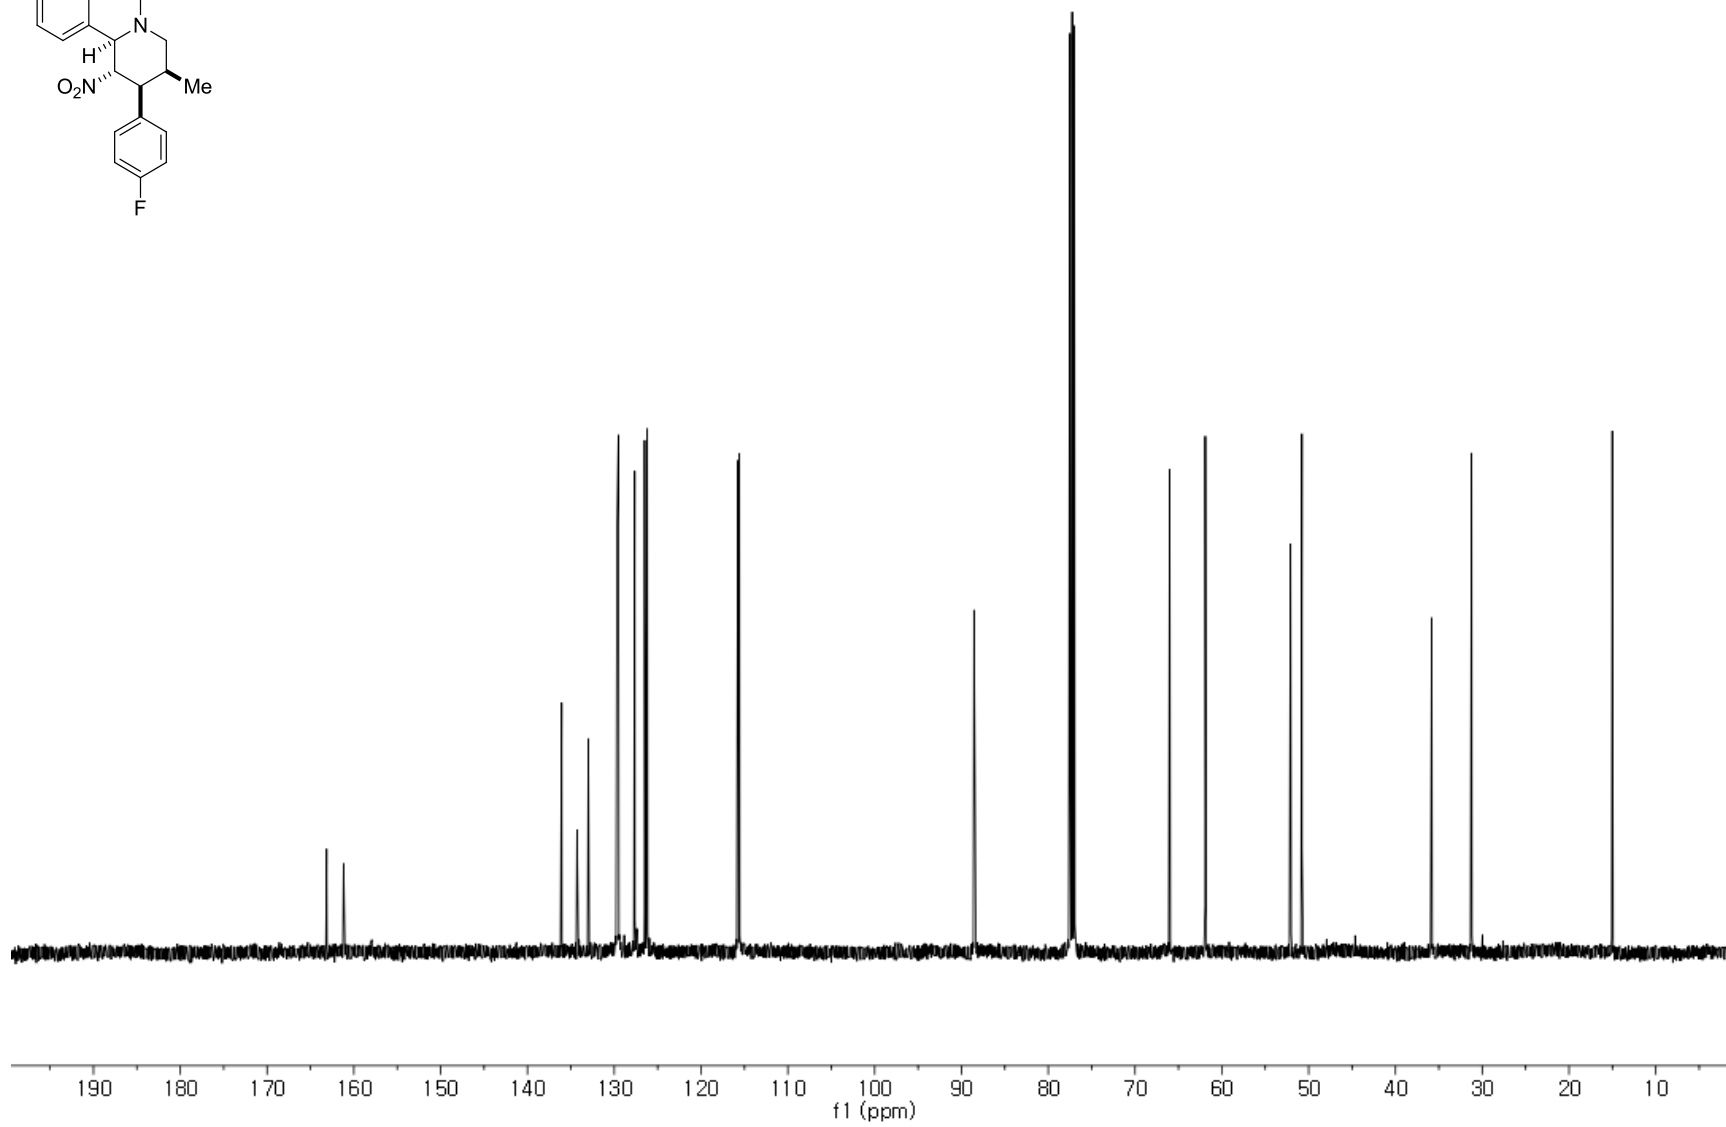

$^1\text{H}$  NMR of **6c** in  $\text{CDCl}_3$

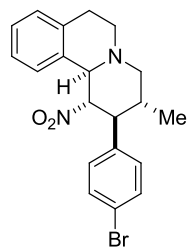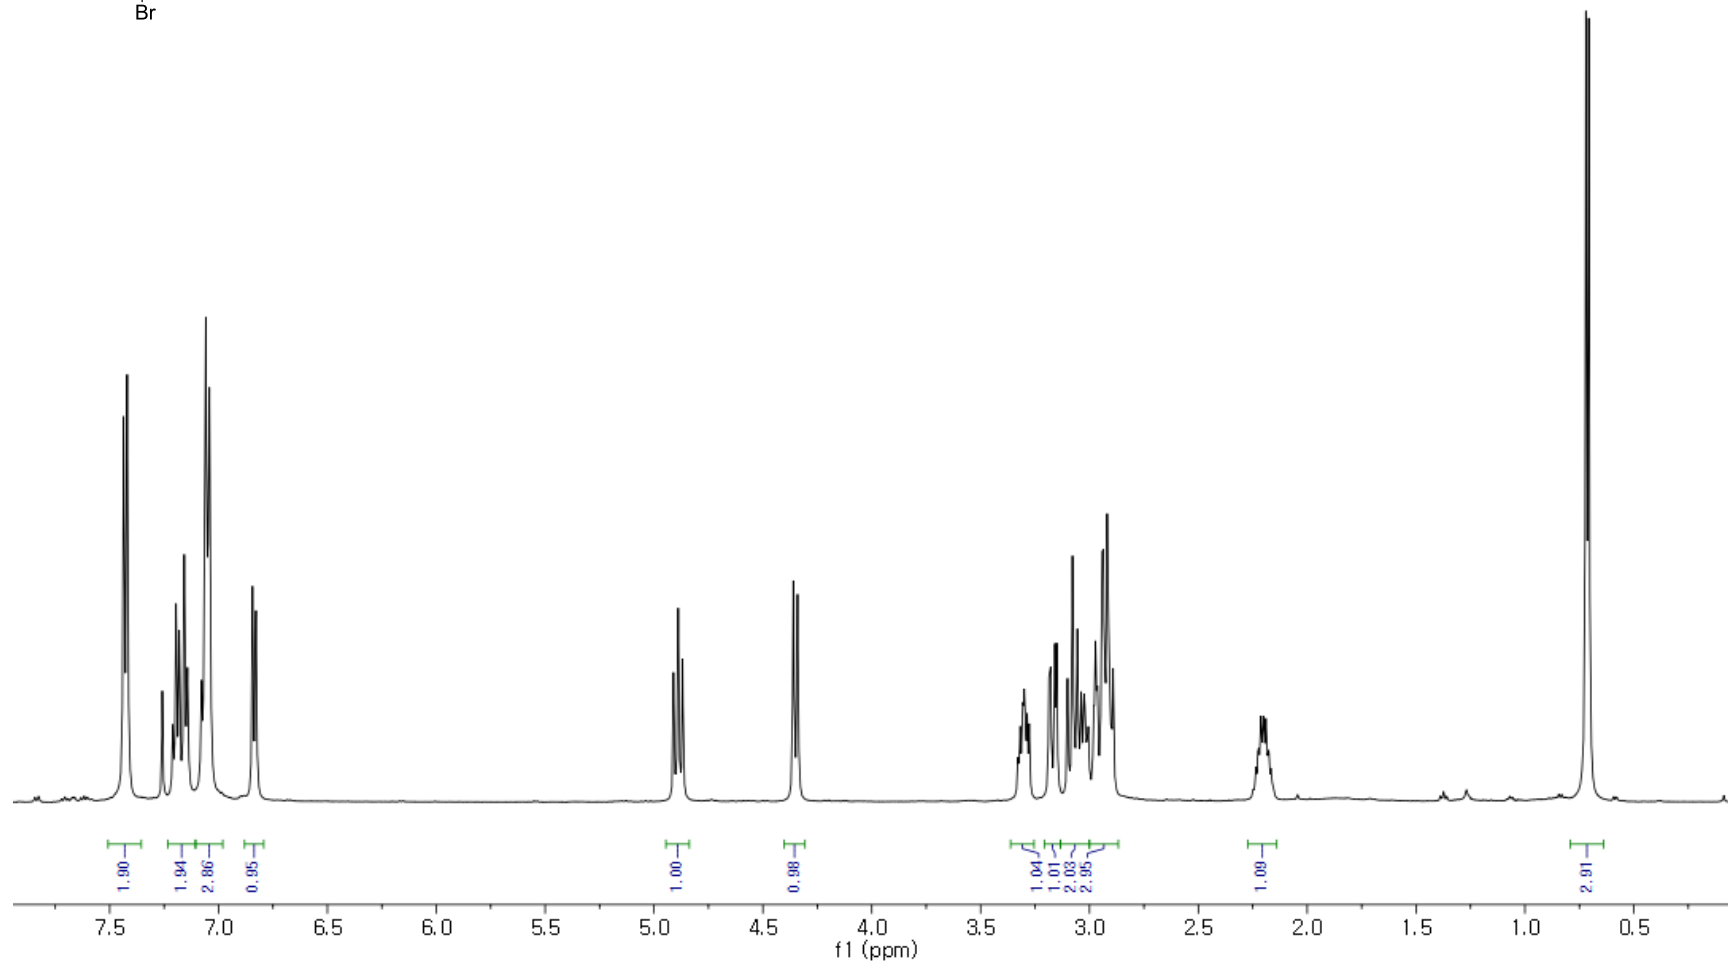

$^{13}\text{C}$  NMR of **6c** in  $\text{CDCl}_3$

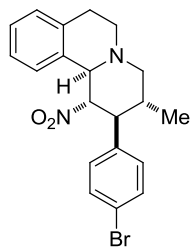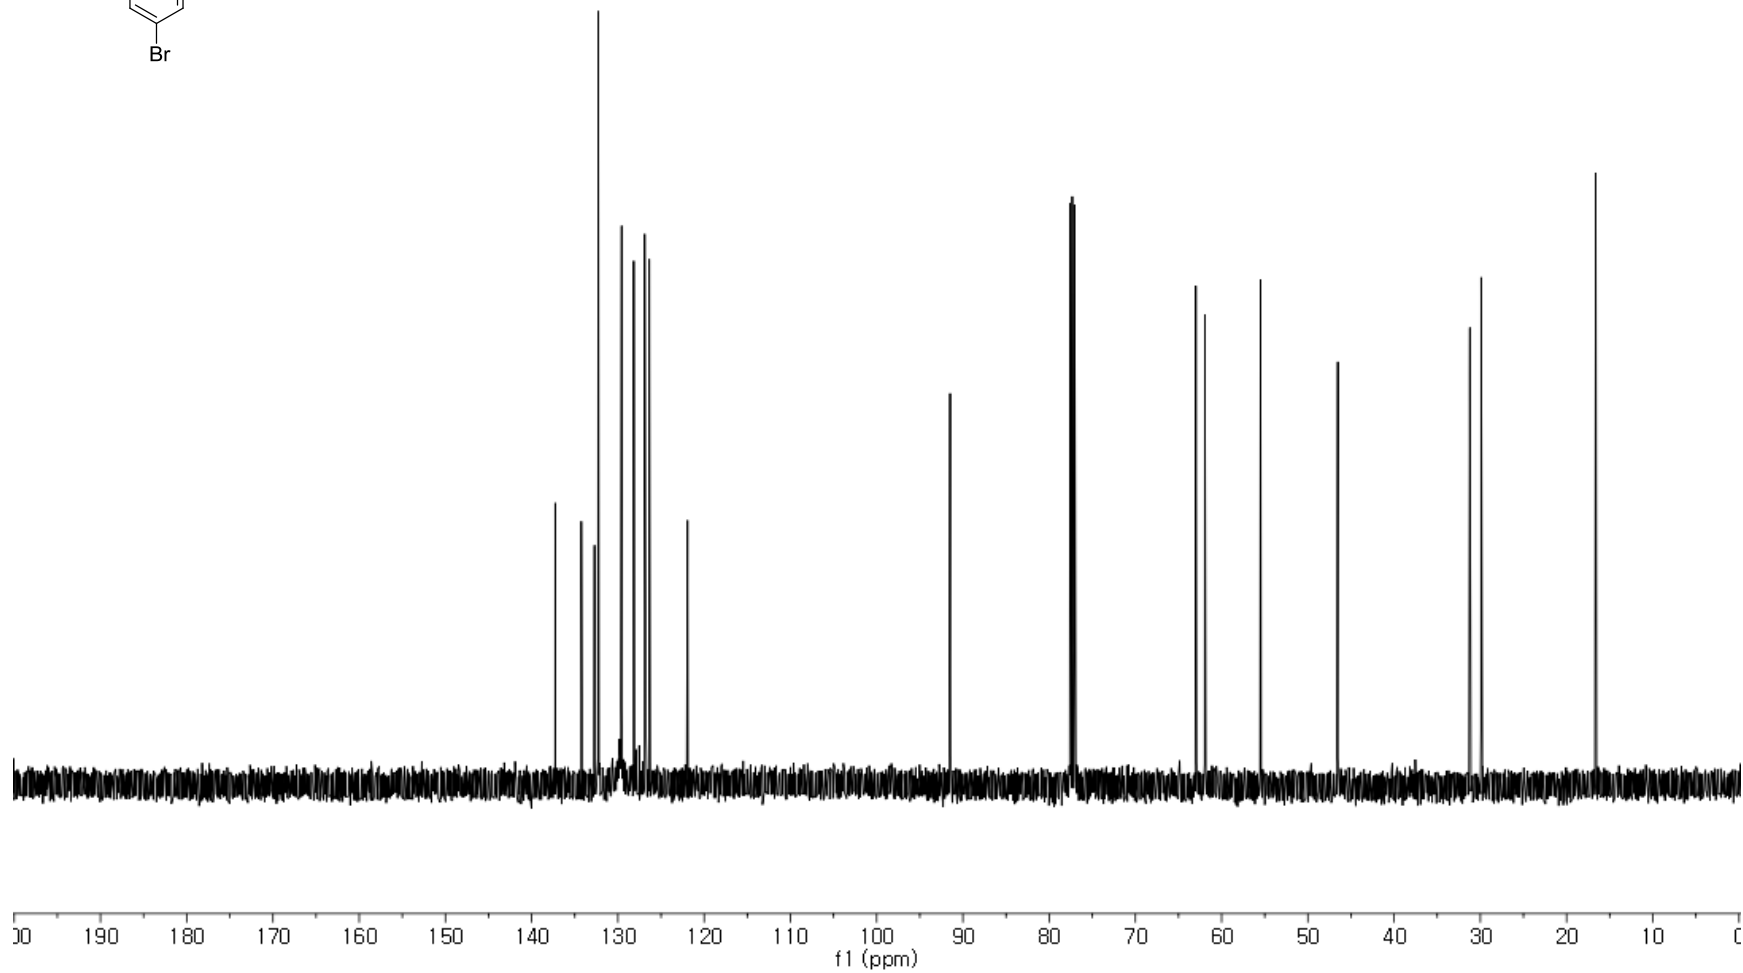

$^1\text{H}$  NMR of **7c** in  $\text{CDCl}_3$

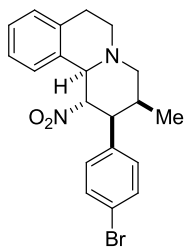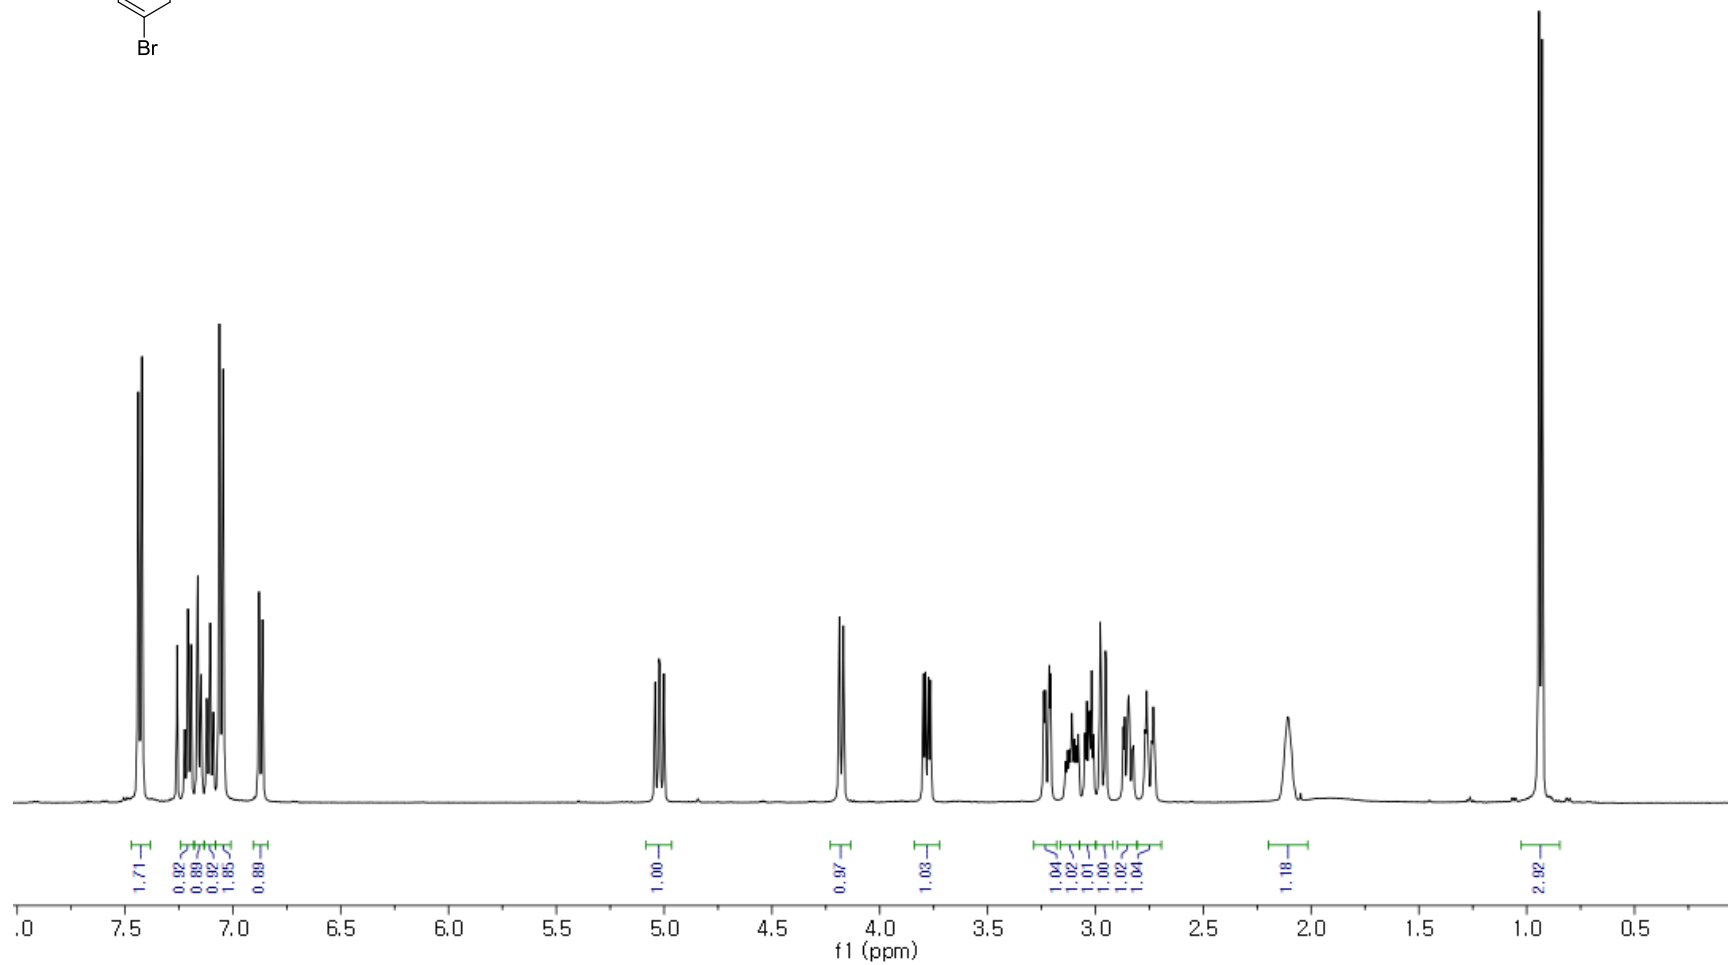



$^{13}\text{C}$  NMR of **7c** in  $\text{CDCl}_3$

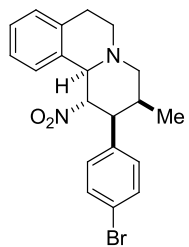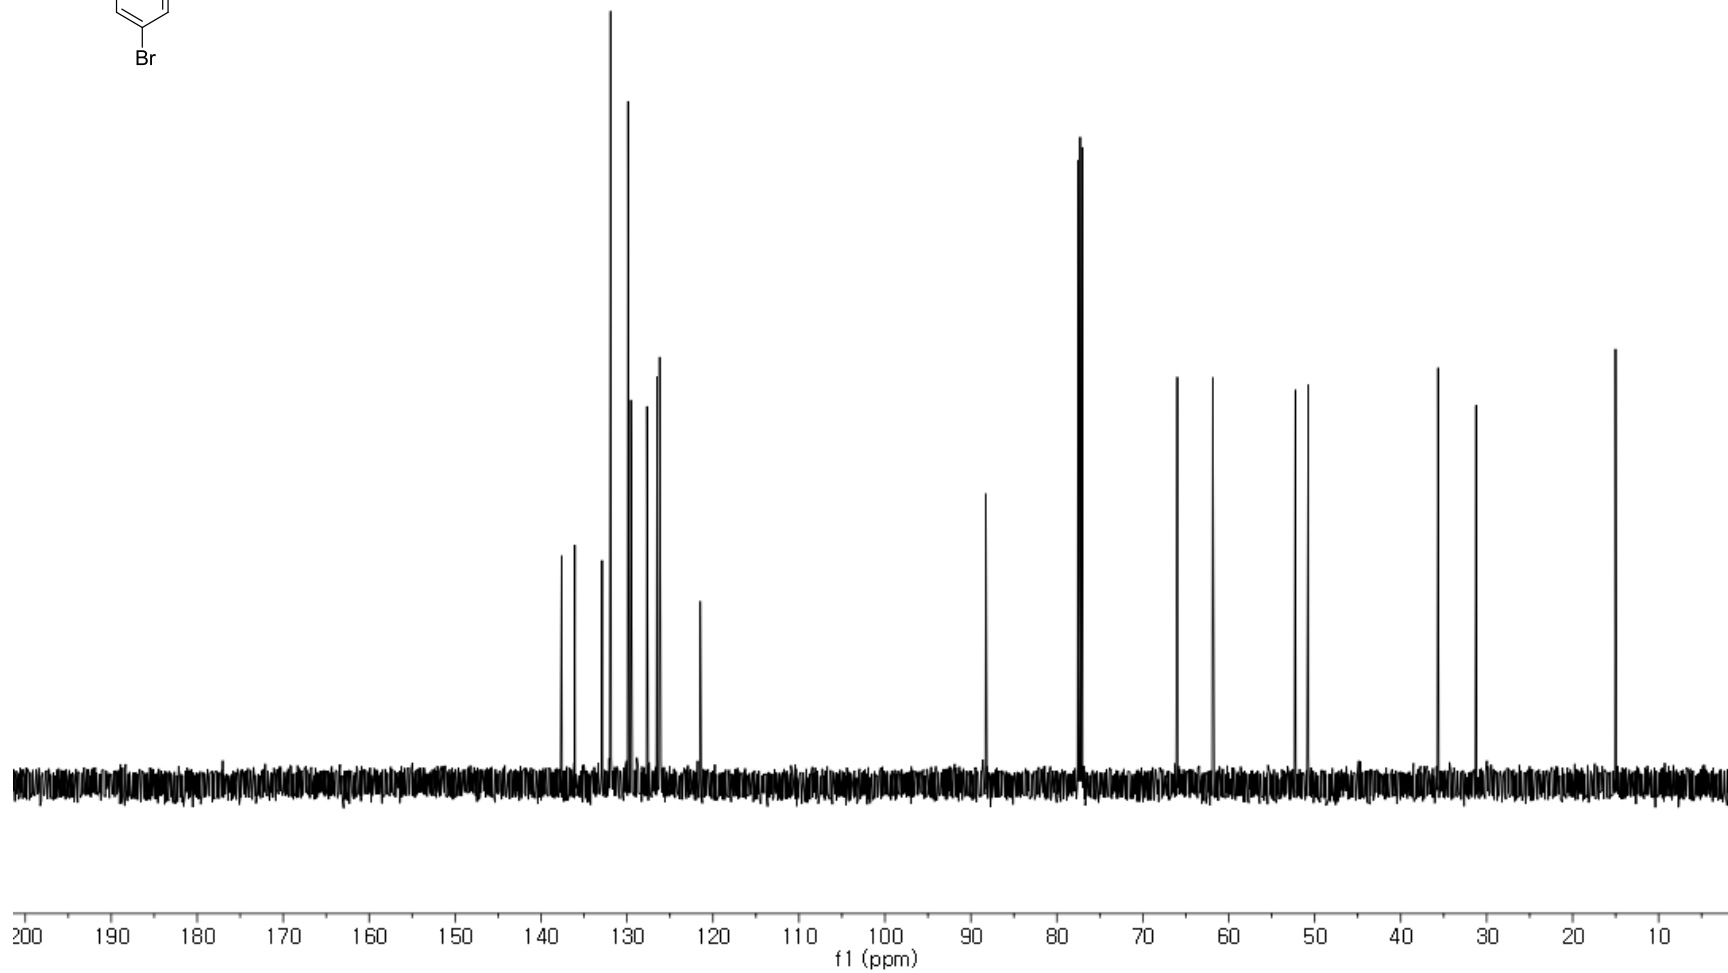

$^1\text{H}$  NMR of **6d** in  $\text{CDCl}_3$

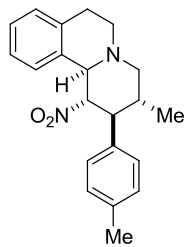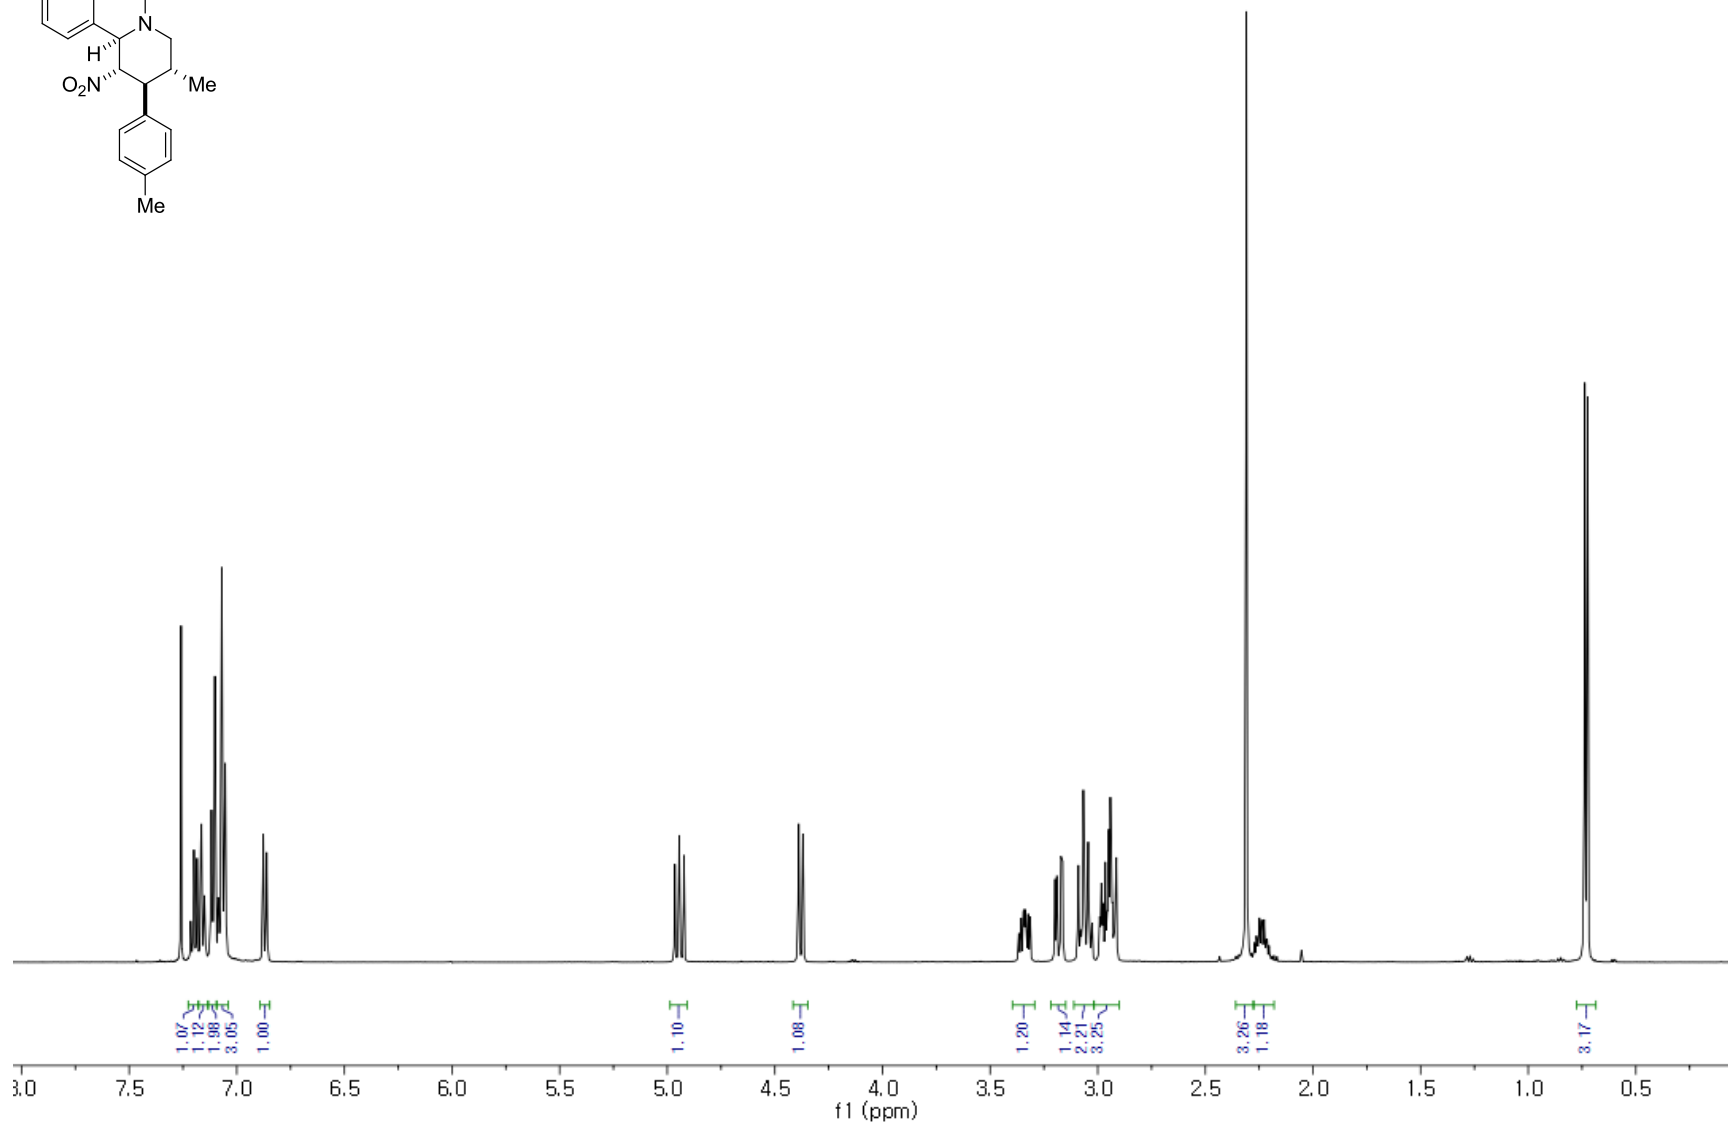

$^{13}\text{C}$  NMR of **6d** in  $\text{CDCl}_3$

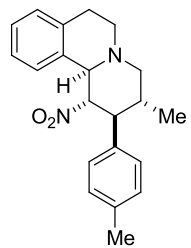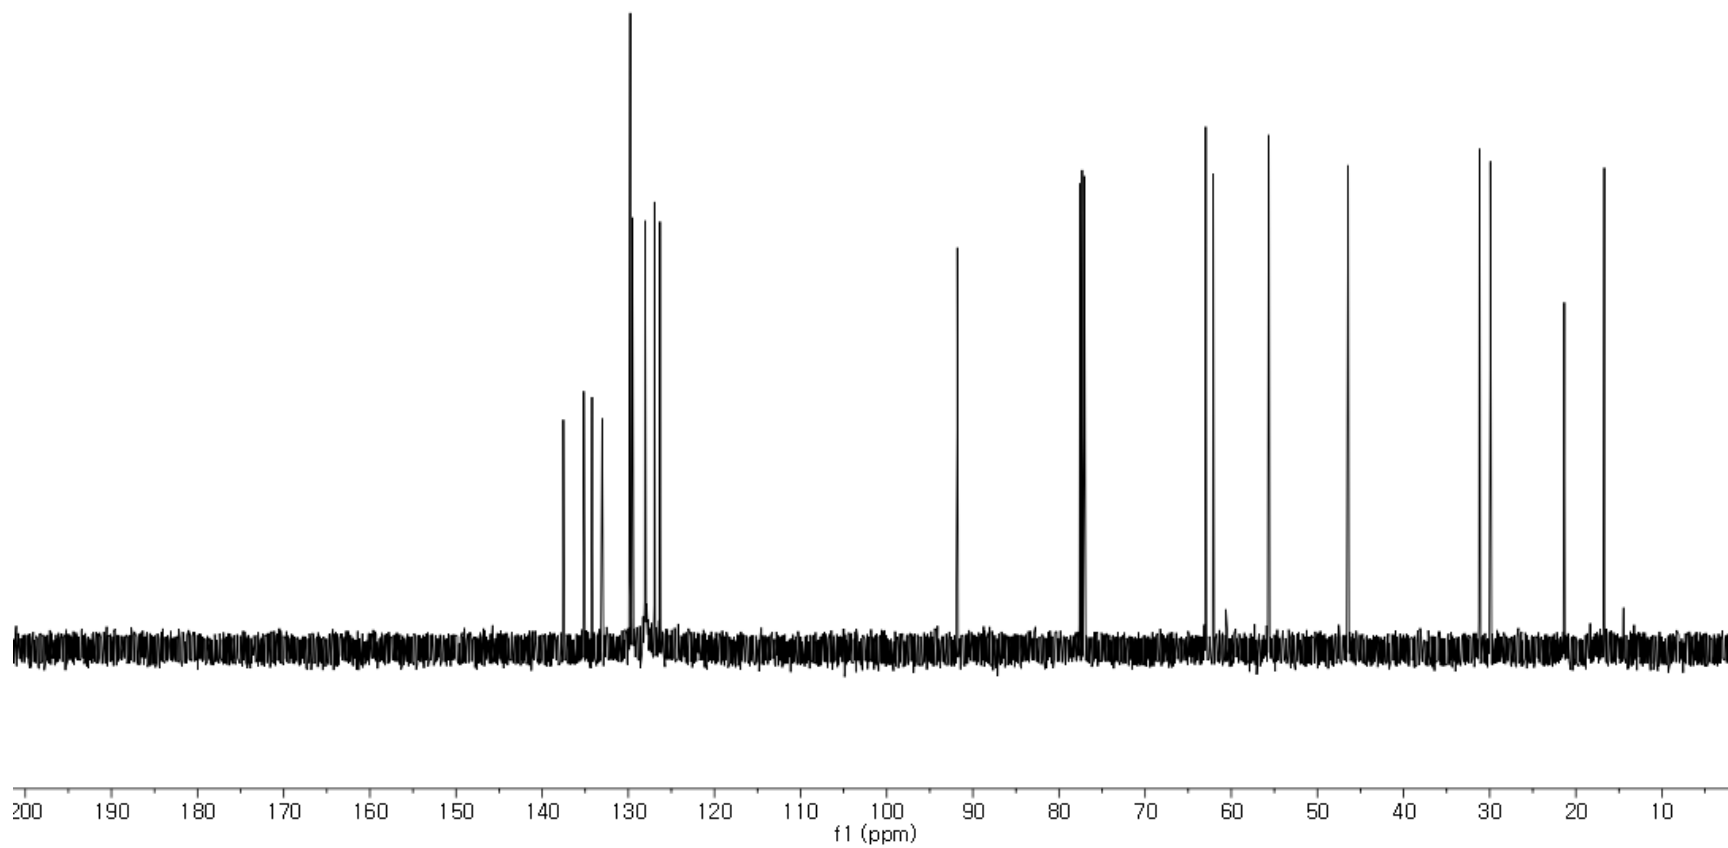

$^1\text{H}$  NMR of **7d** in  $\text{CDCl}_3$

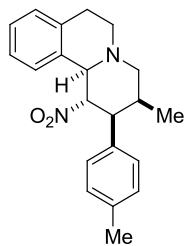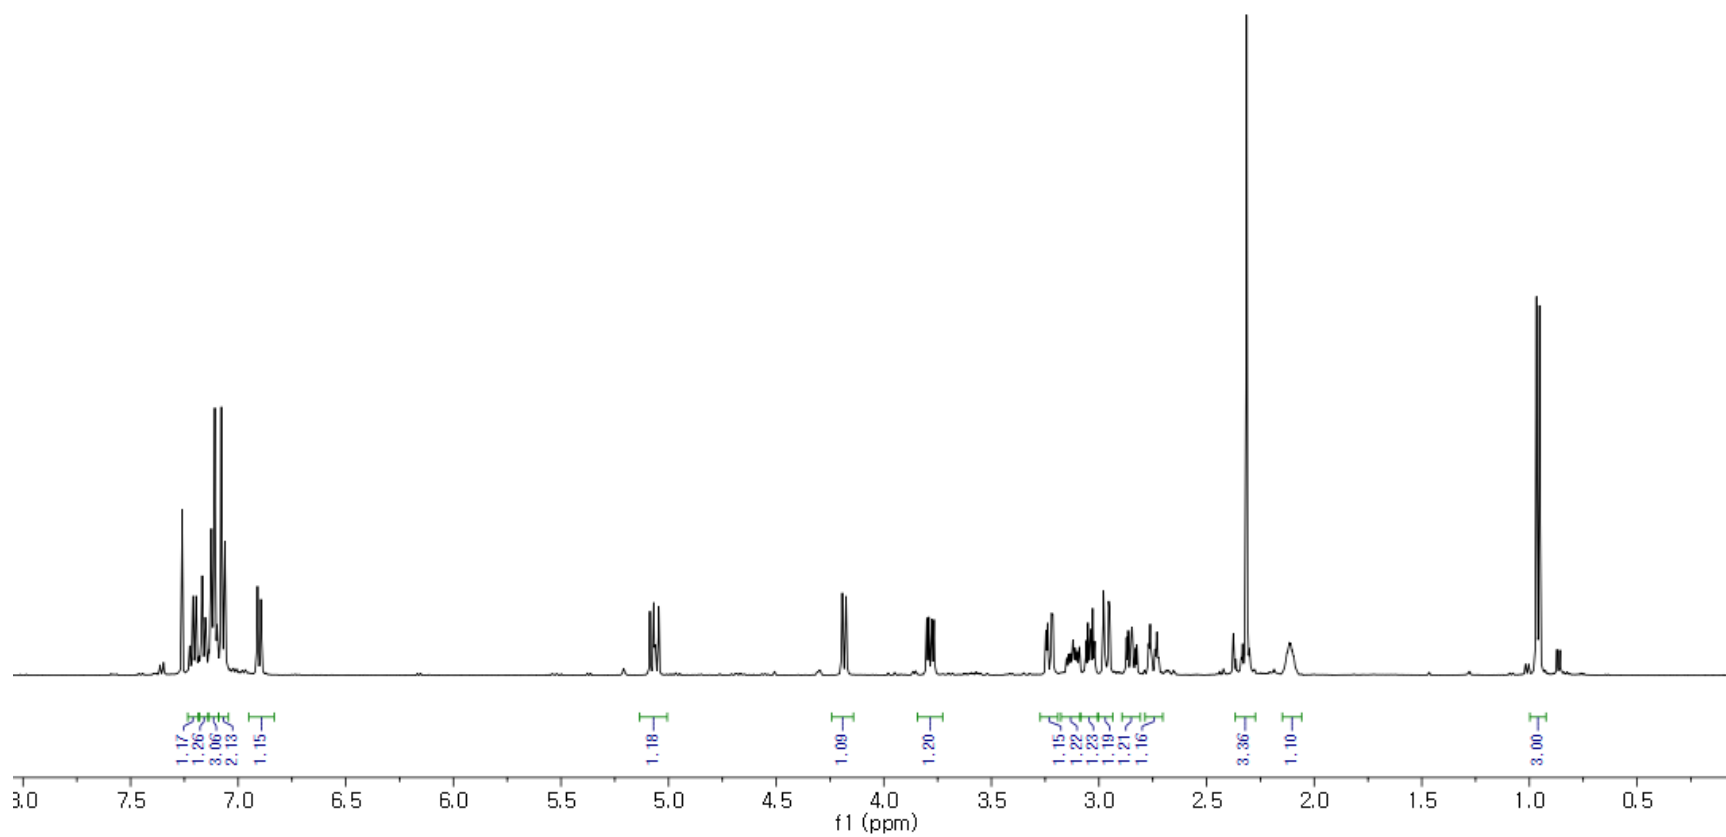

$^{13}\text{C}$  NMR of **7d** in  $\text{CDCl}_3$

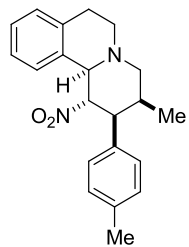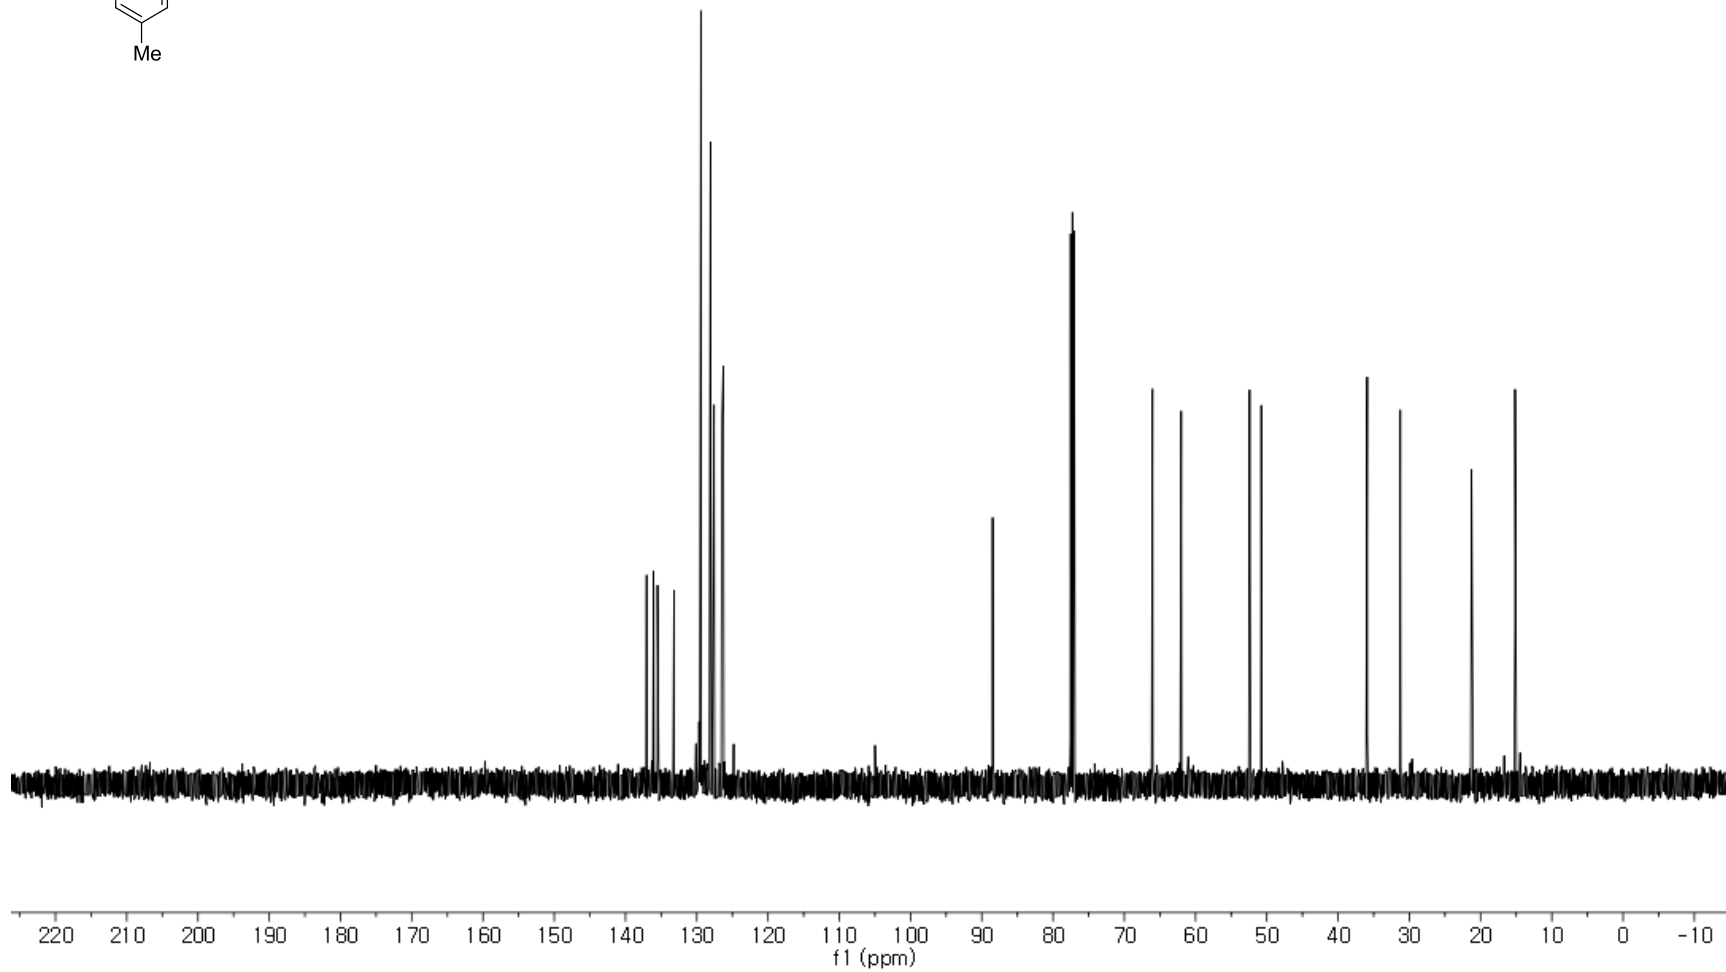

$^1\text{H}$  NMR of **6e** in  $\text{CDCl}_3$

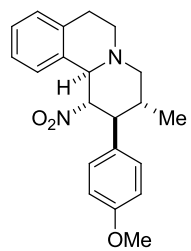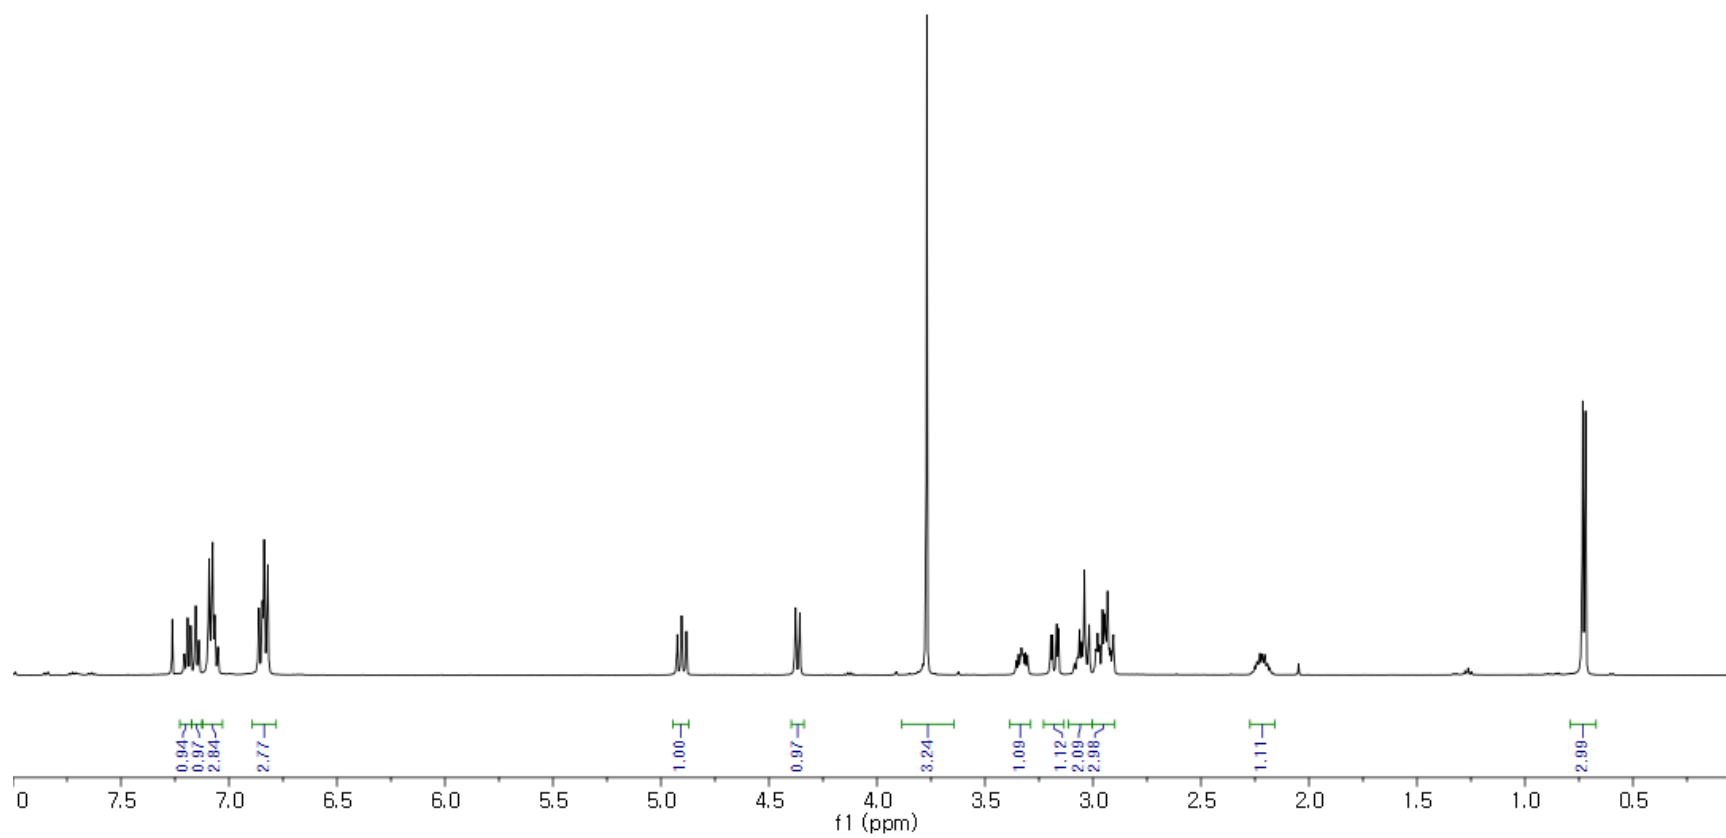

$^{13}\text{C}$  NMR of **6e** in  $\text{CDCl}_3$

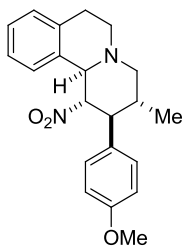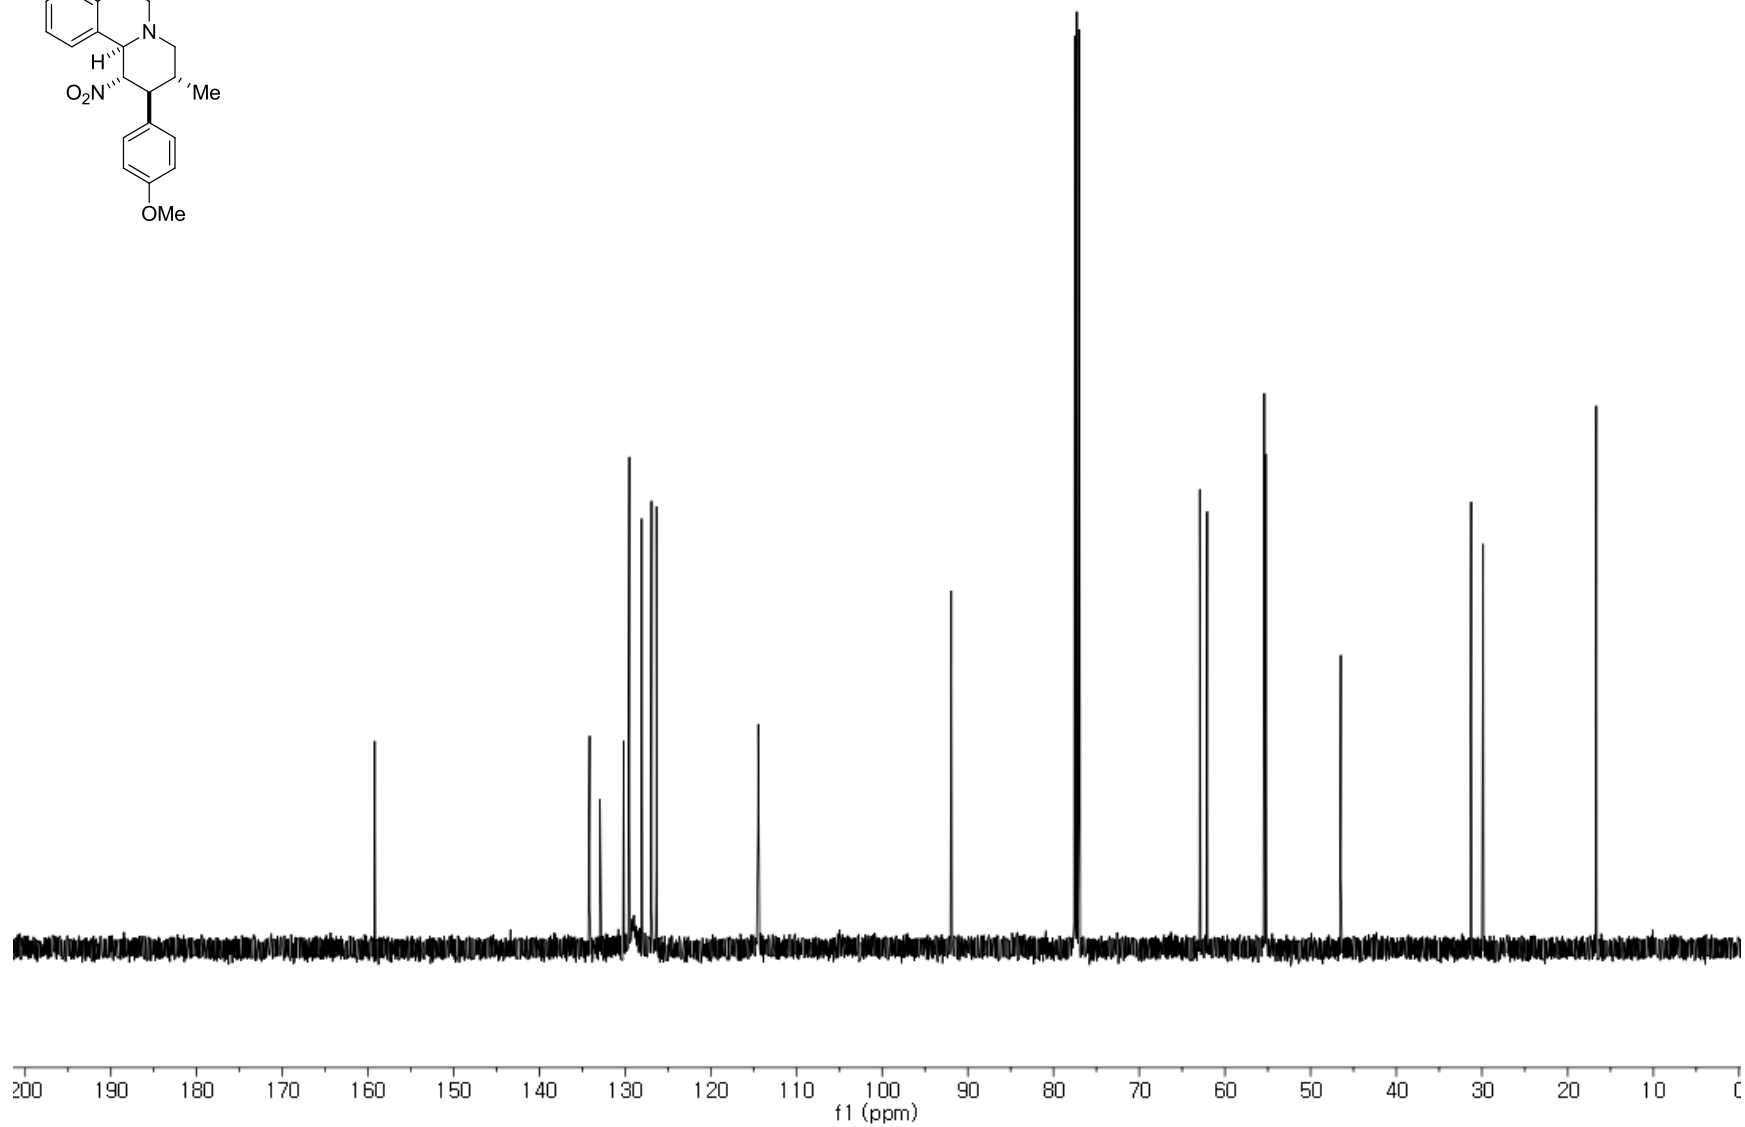

<sup>1</sup>H NMR of **7e** in CDCl<sub>3</sub>

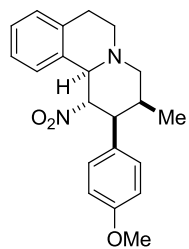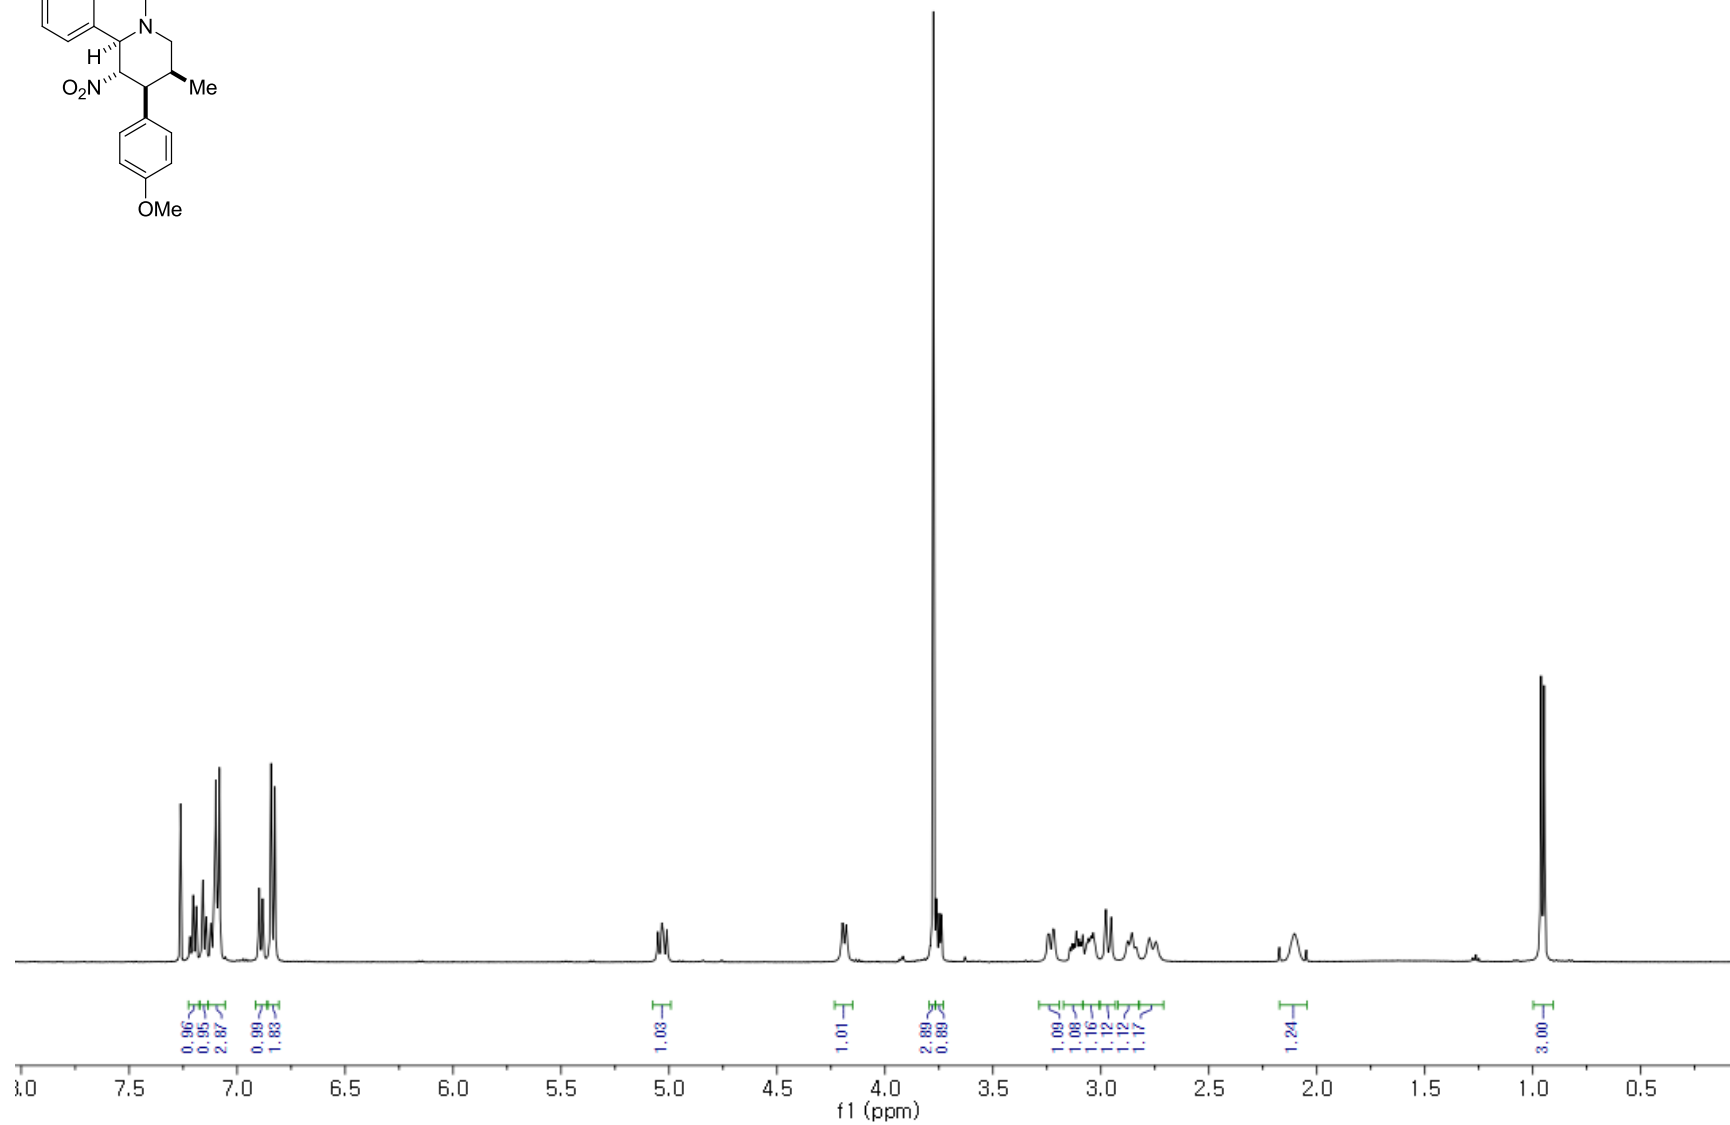



$^{13}\text{C}$  NMR of **7e** in  $\text{CDCl}_3$

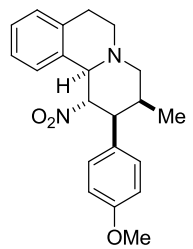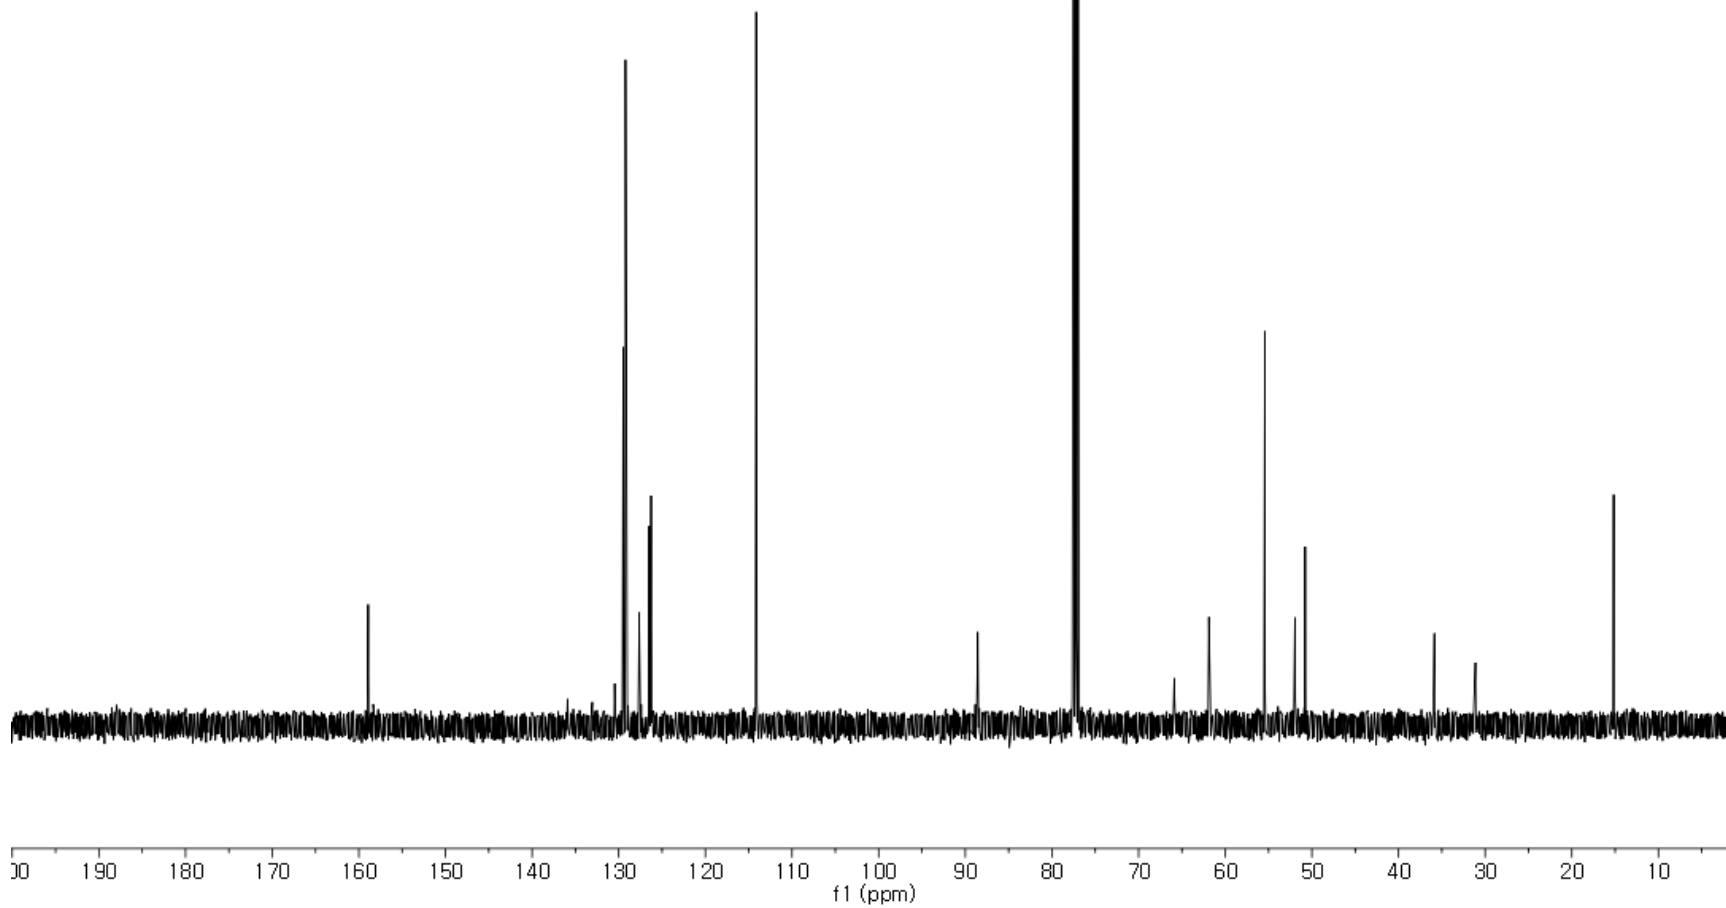

$^1\text{H}$  NMR of **6f** in  $\text{CDCl}_3$

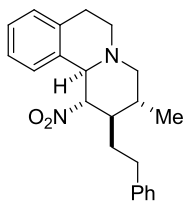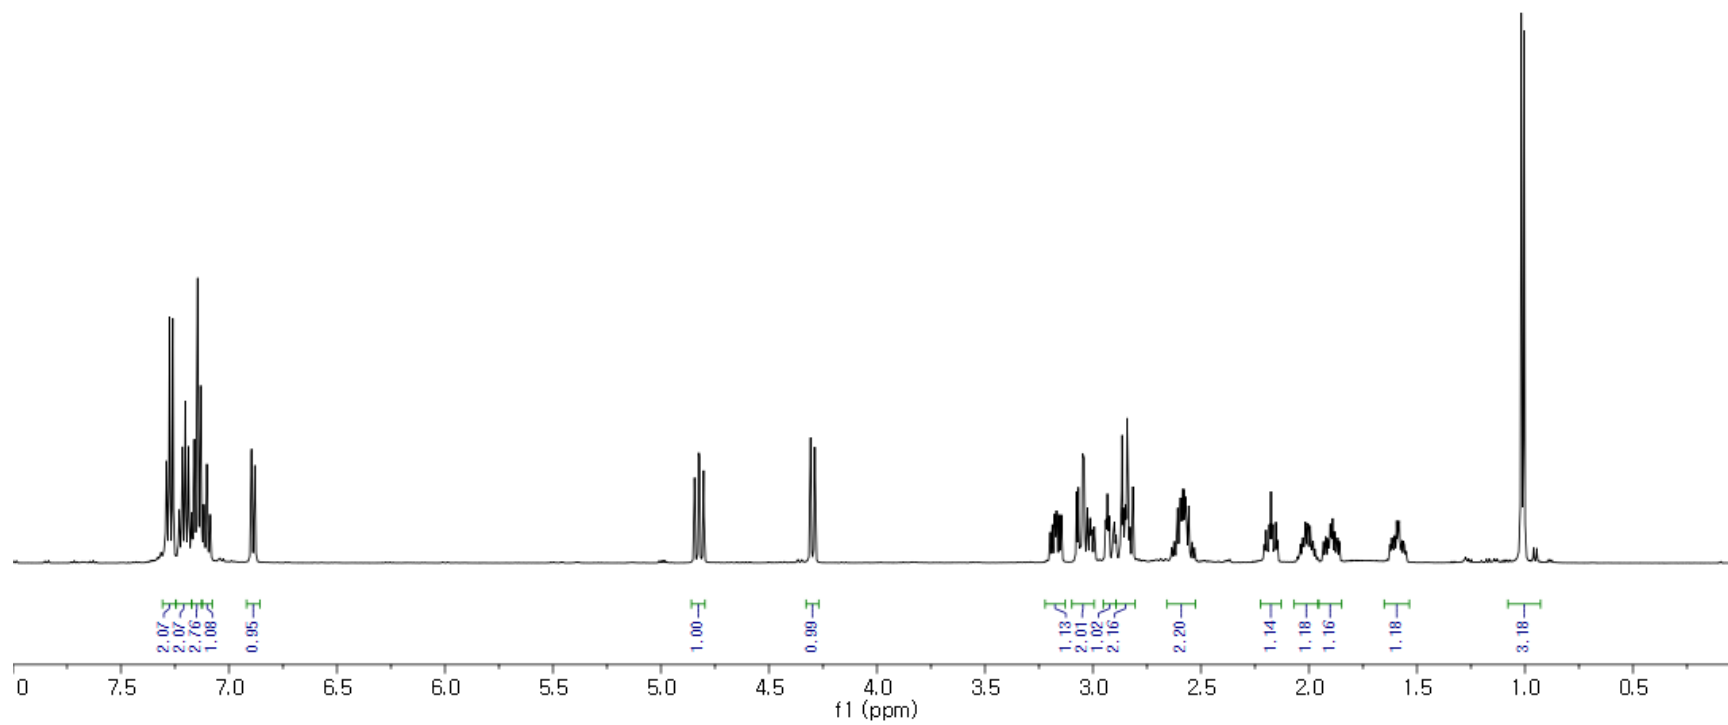

$^{13}\text{C}$  NMR of **6f** in  $\text{CDCl}_3$

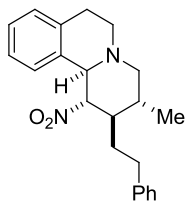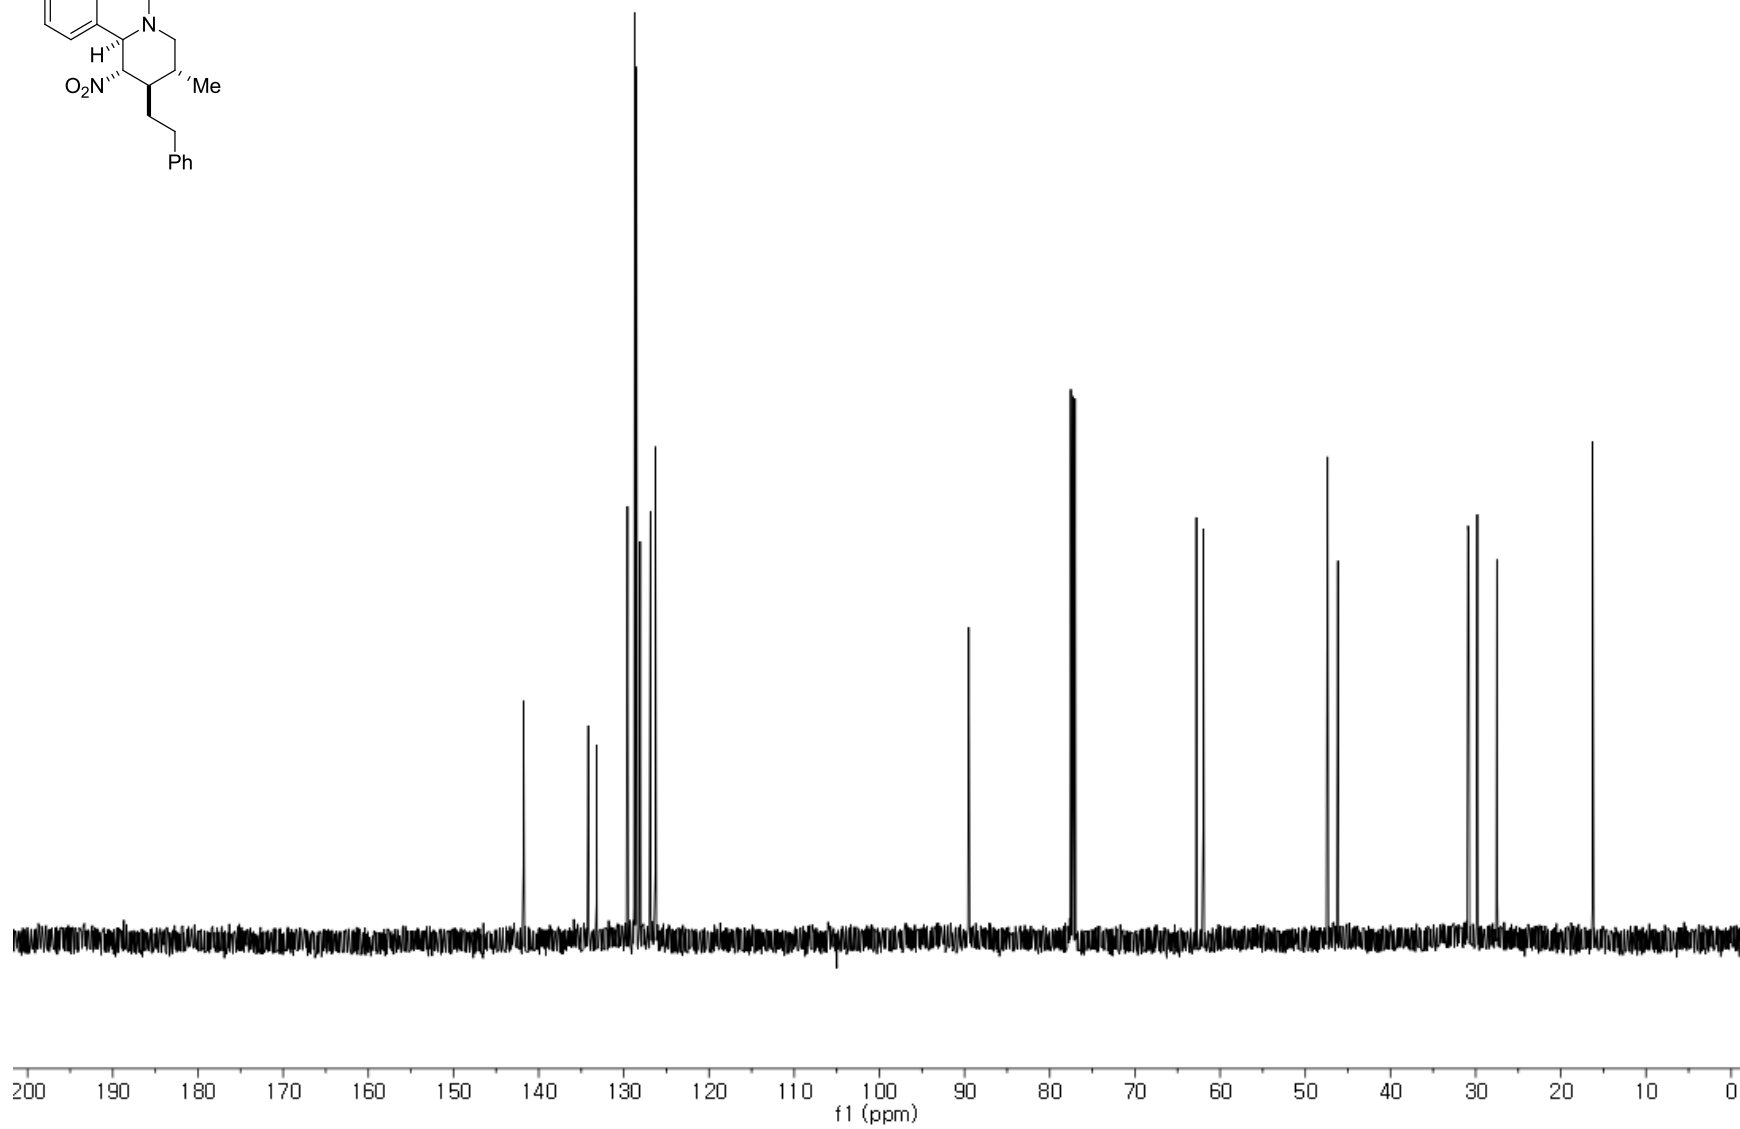

$^1\text{H}$  NMR of **7f** in  $\text{CDCl}_3$

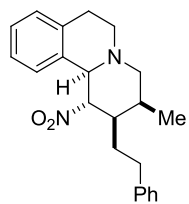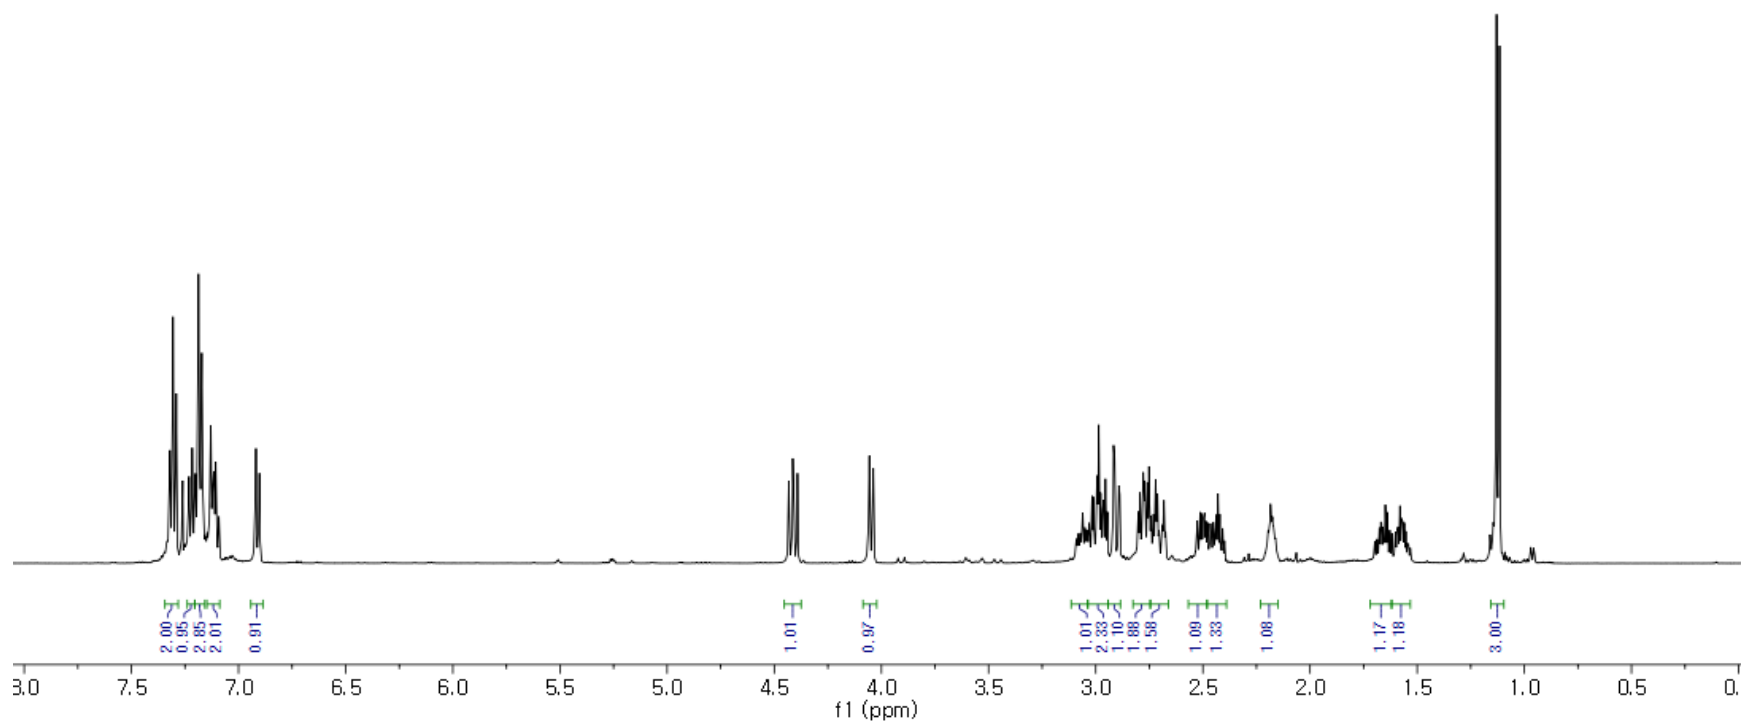

$^{13}\text{C}$  NMR of **7f** in  $\text{CDCl}_3$

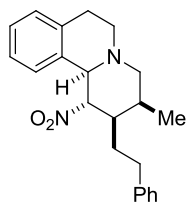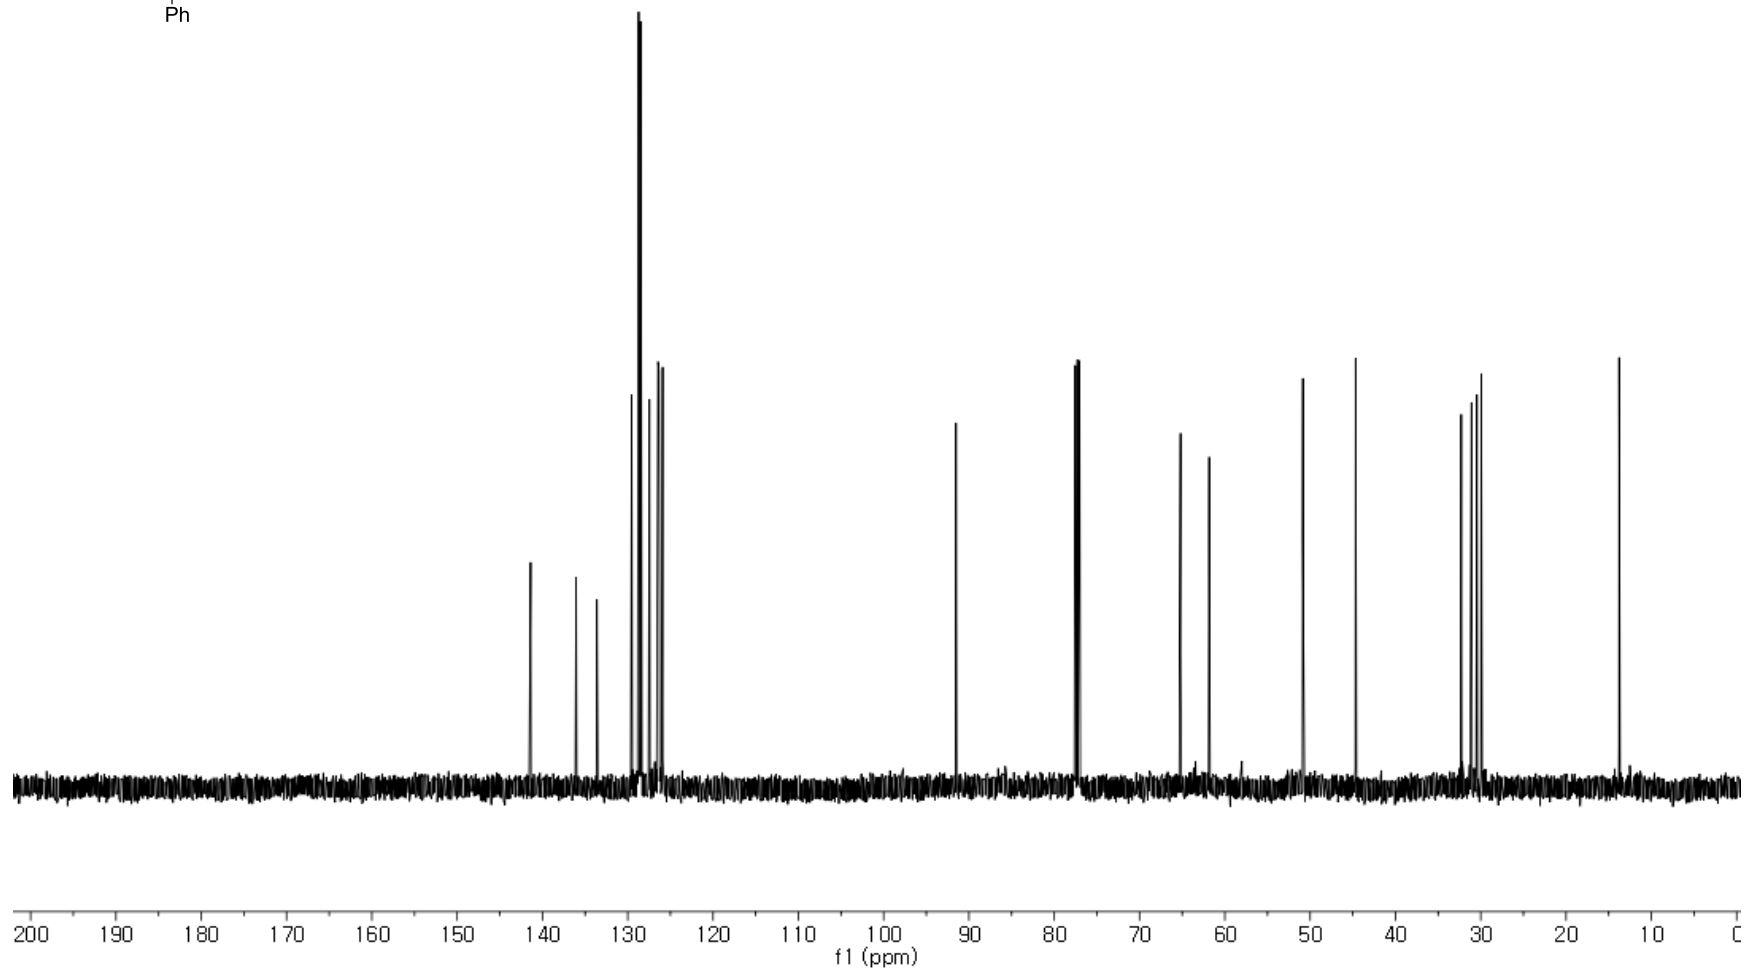

$^1\text{H}$  NMR of **6g** in  $\text{CDCl}_3$

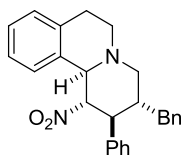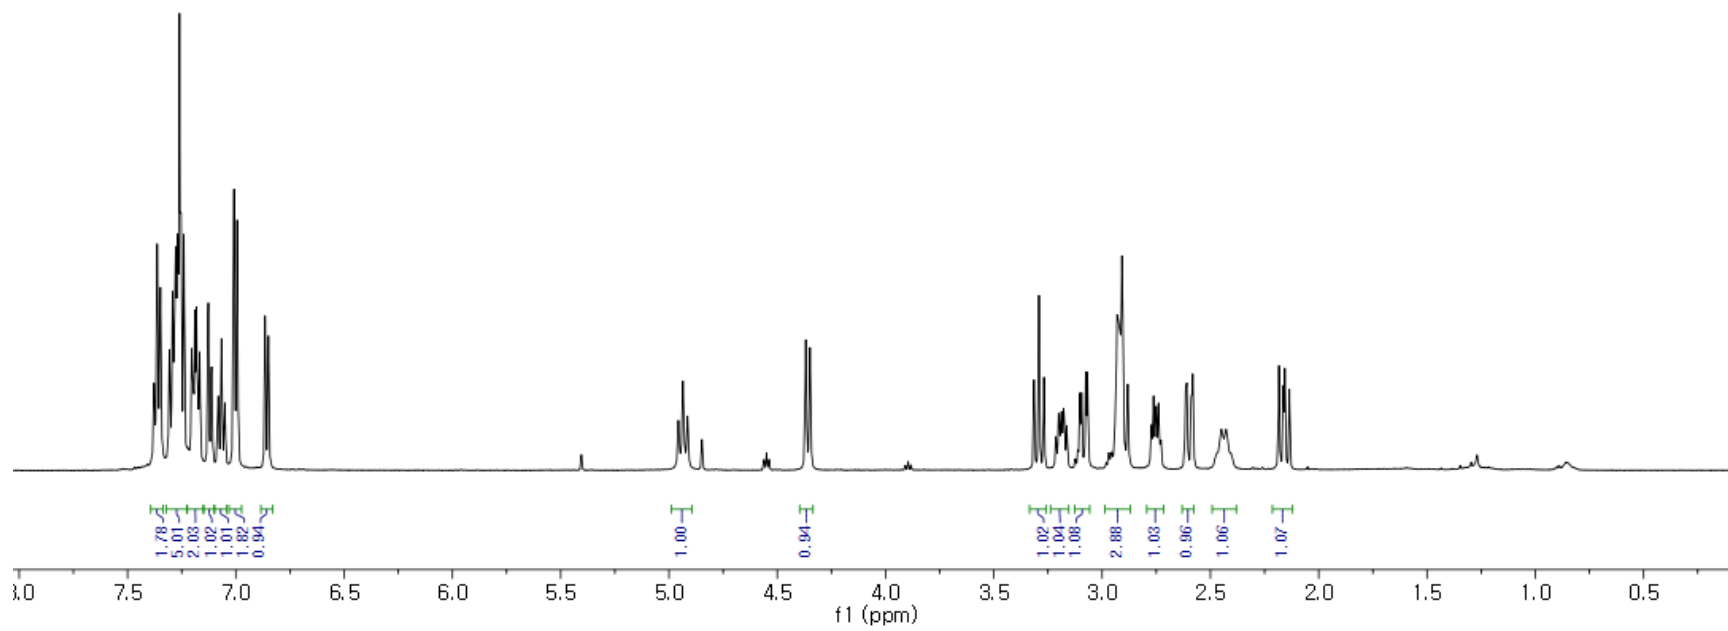

$^{13}\text{C}$  NMR of **6g** in  $\text{CDCl}_3$

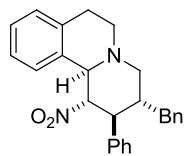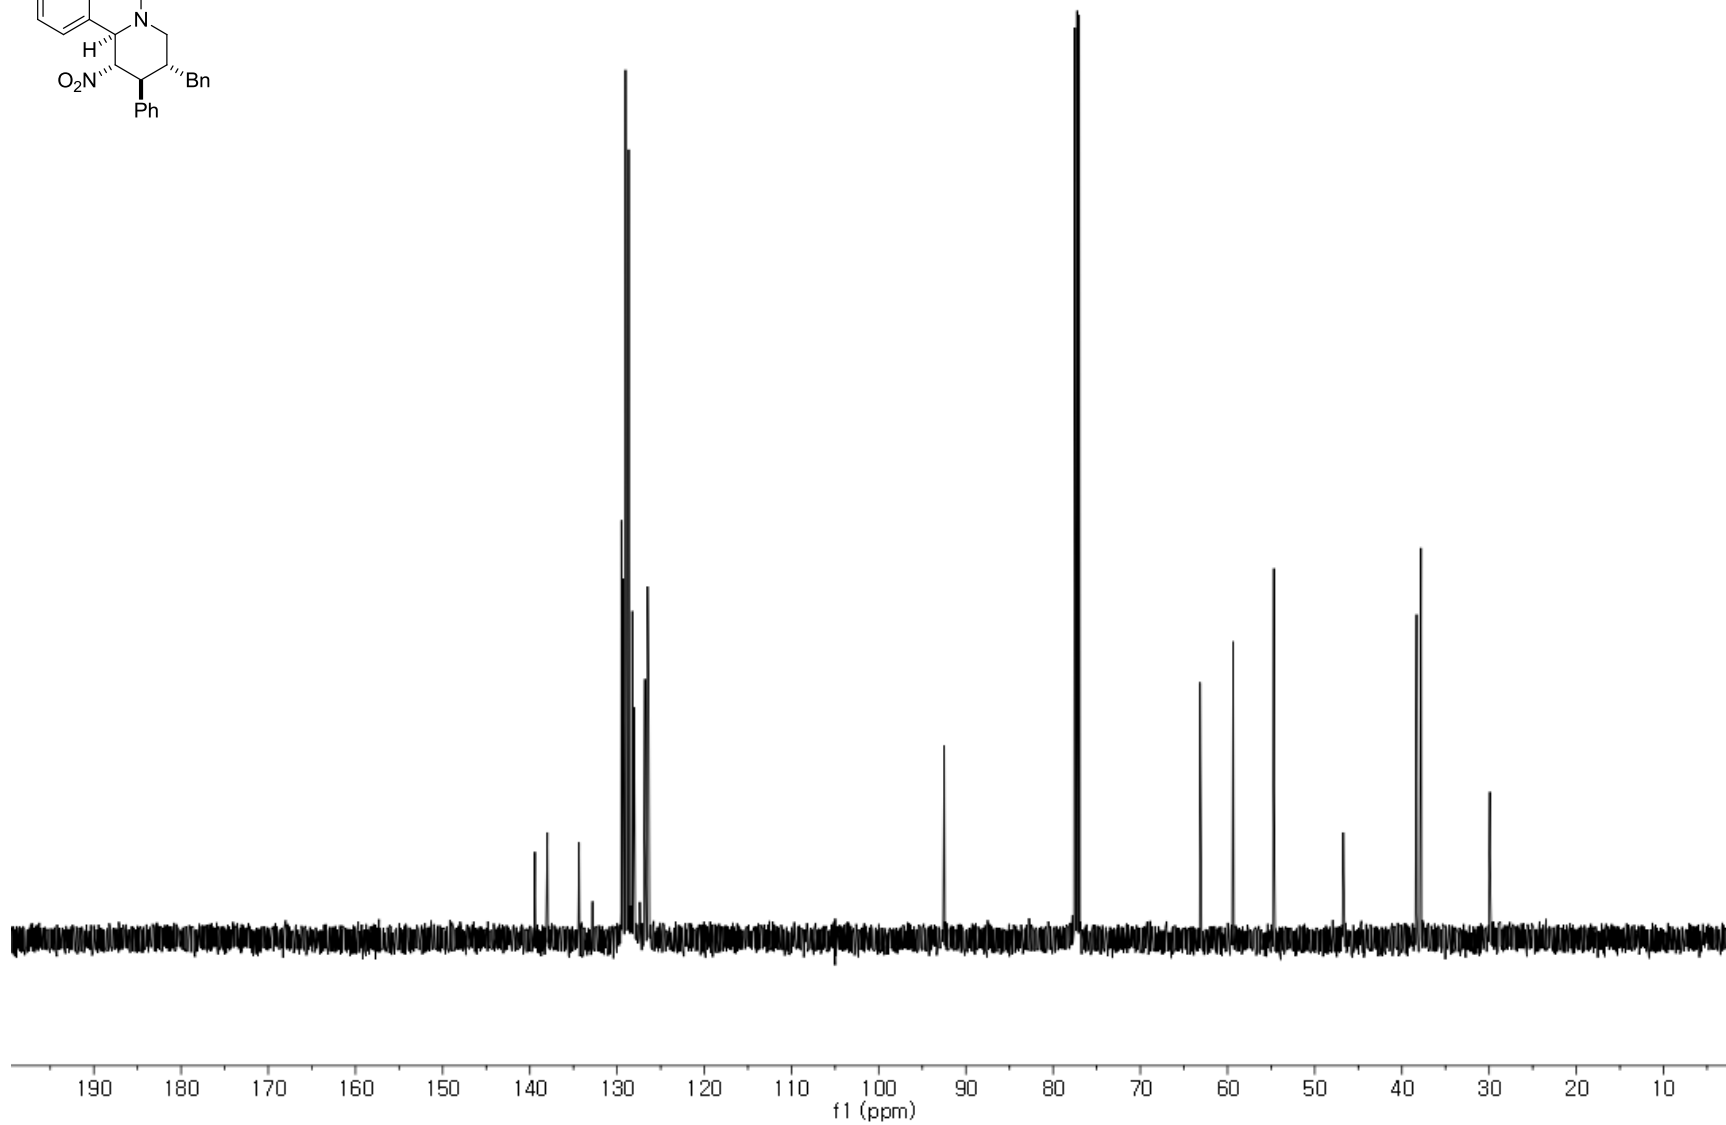

$^1\text{H}$  NMR of **7g** in  $\text{CDCl}_3$

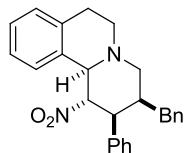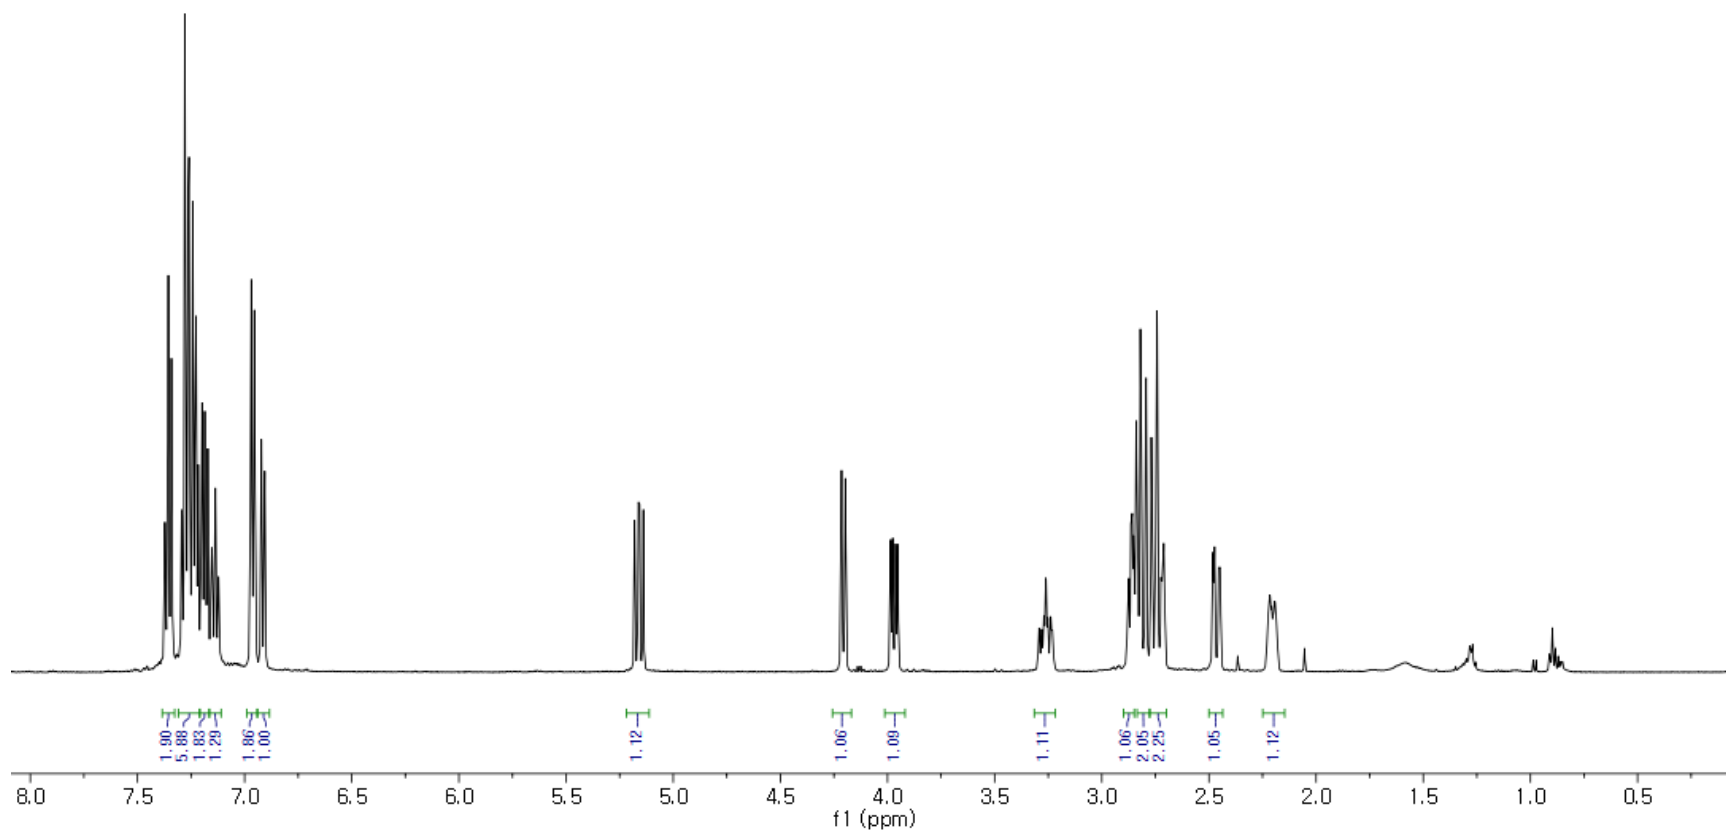



$^{13}\text{C}$  NMR of **7g** in  $\text{CDCl}_3$

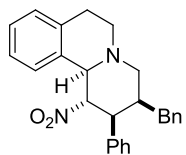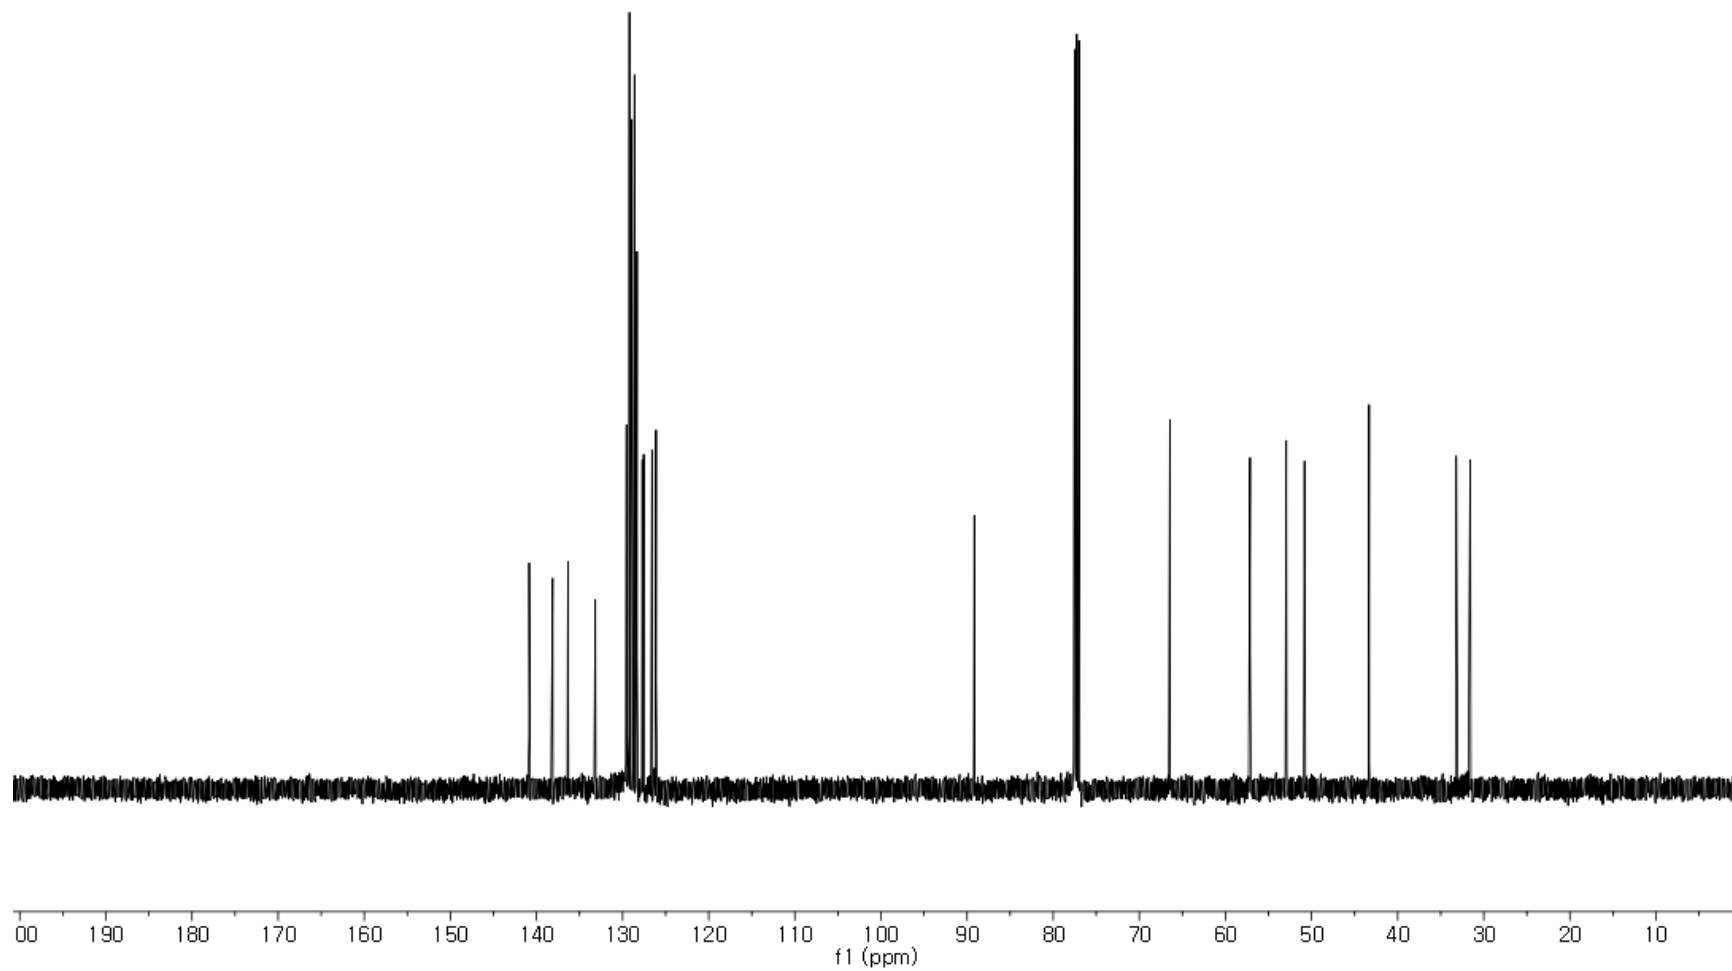

$^1\text{H}$  NMR of **6h** in  $\text{CDCl}_3$

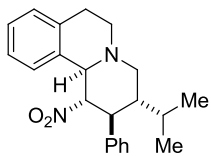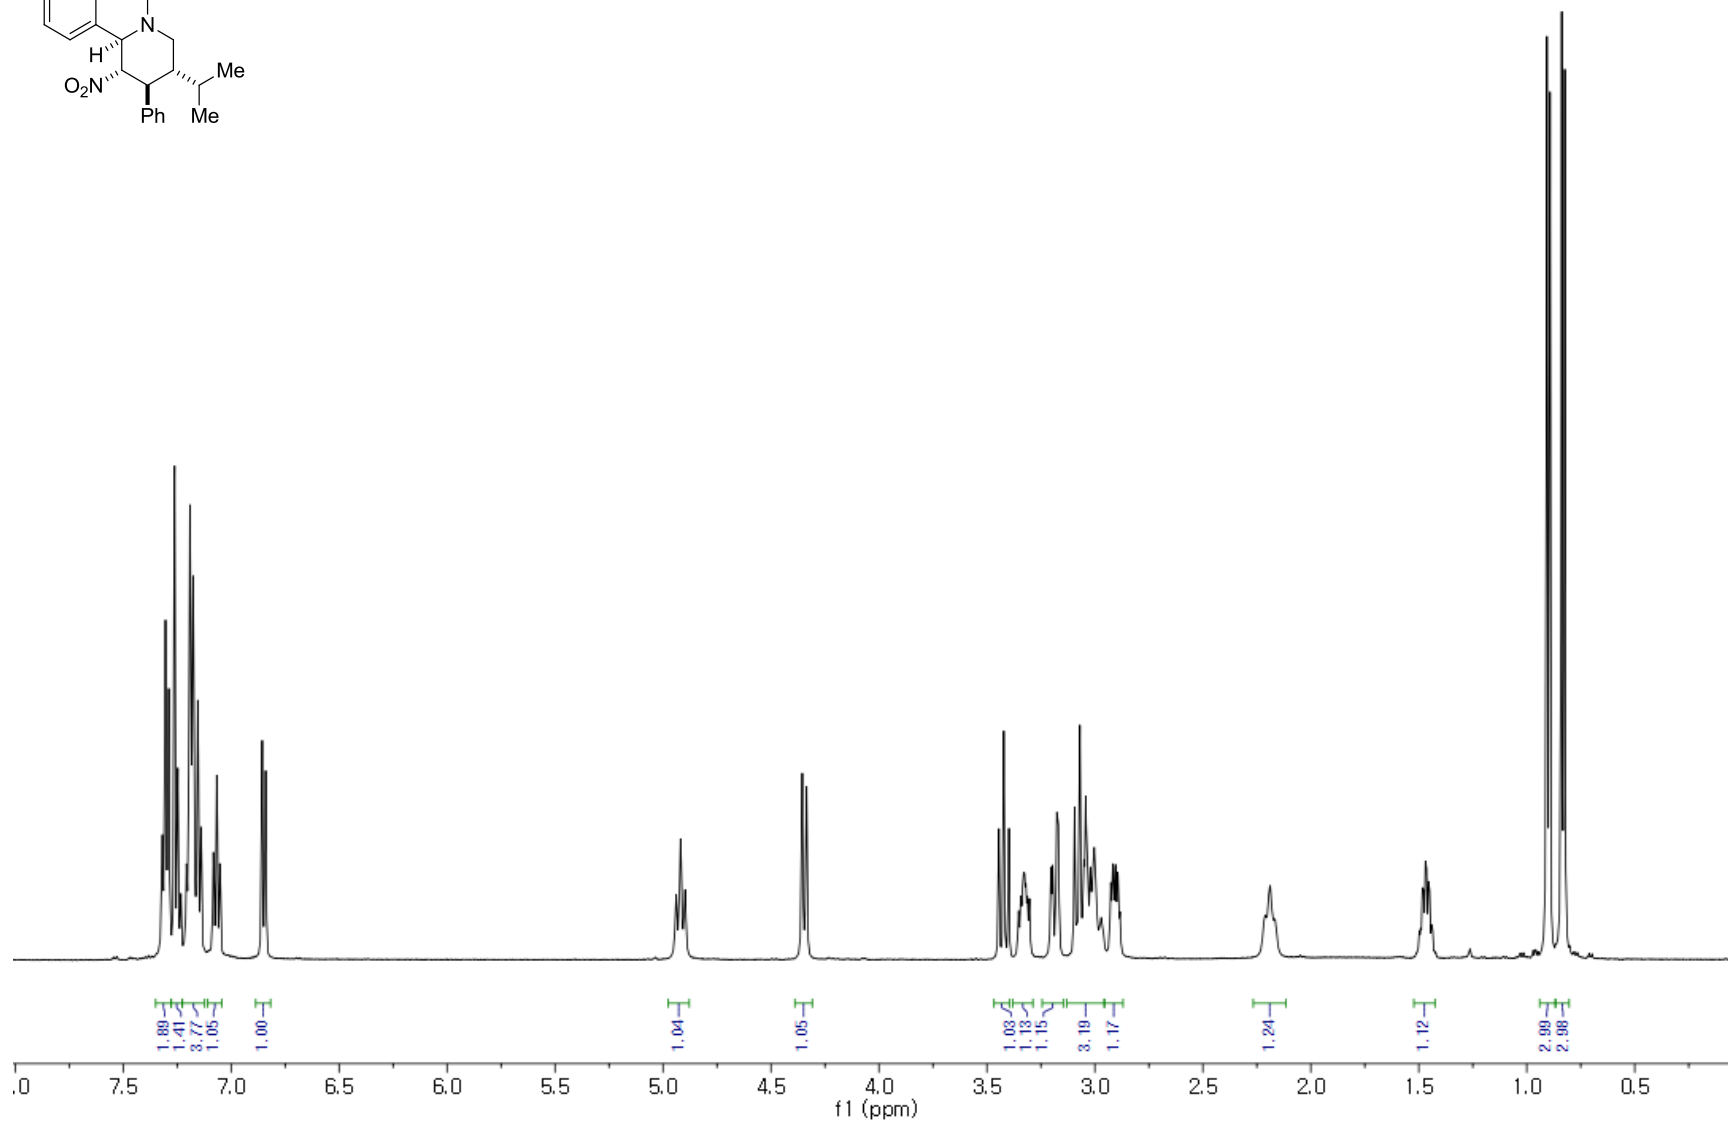

$^{13}\text{C}$  NMR of **6h** in  $\text{CDCl}_3$

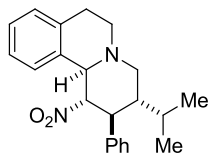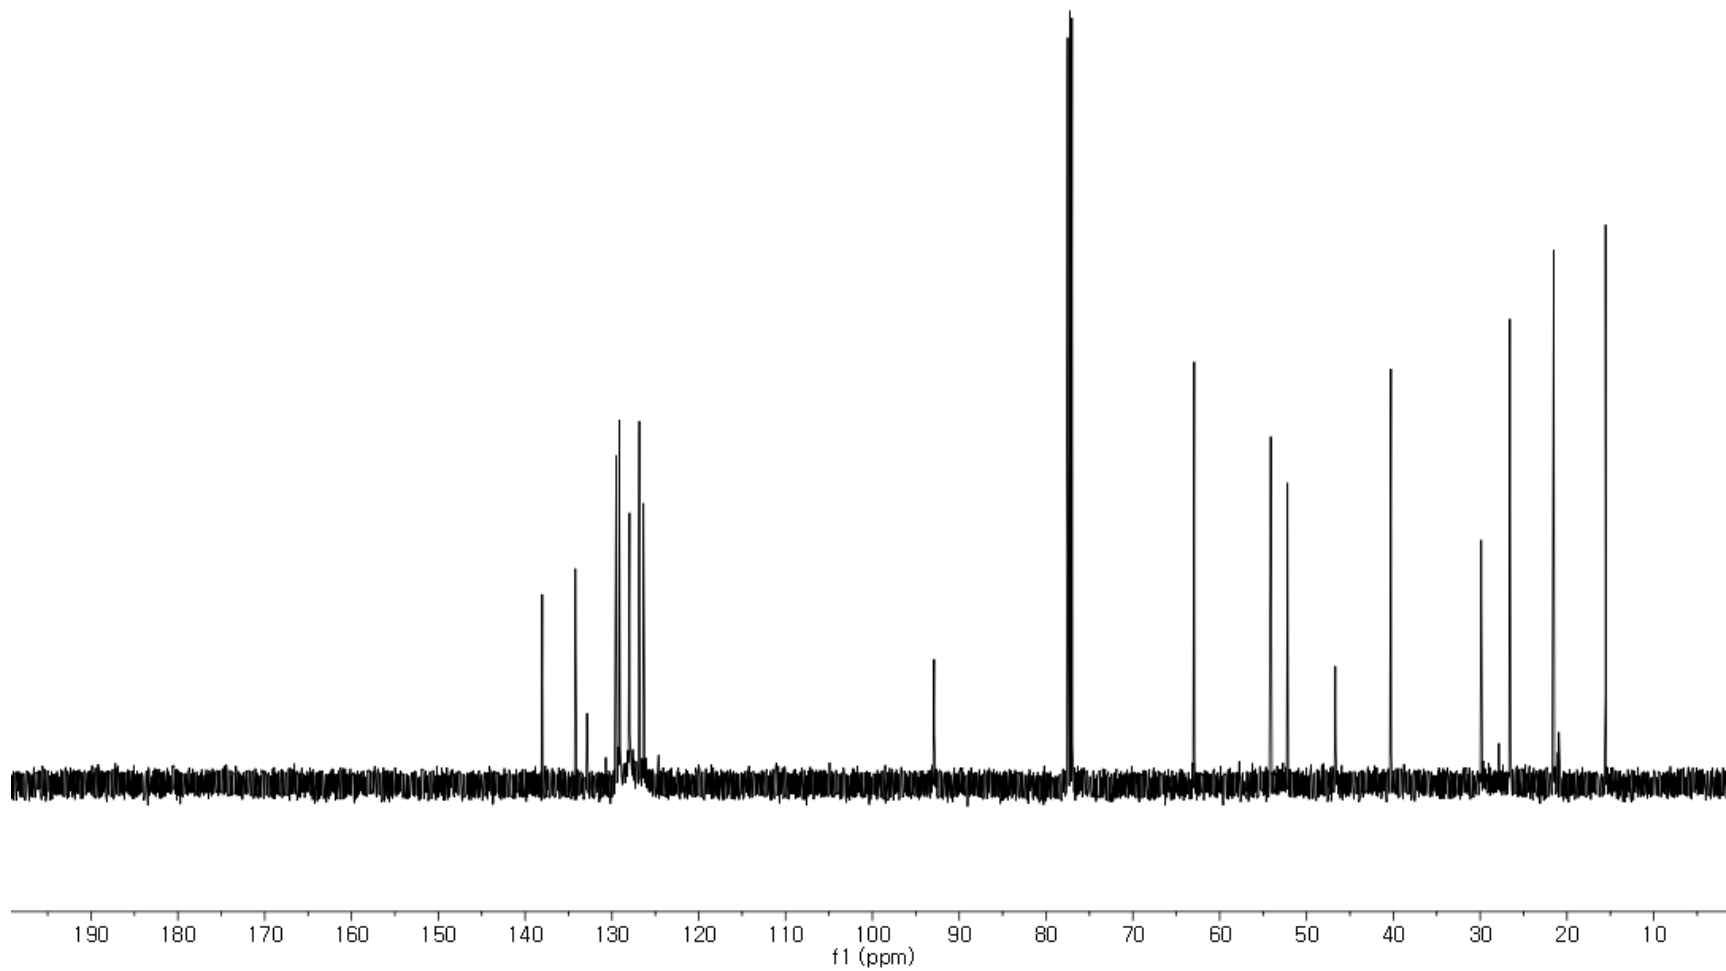

<sup>1</sup>H NMR of **6i** in CDCl<sub>3</sub>

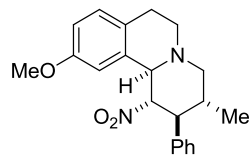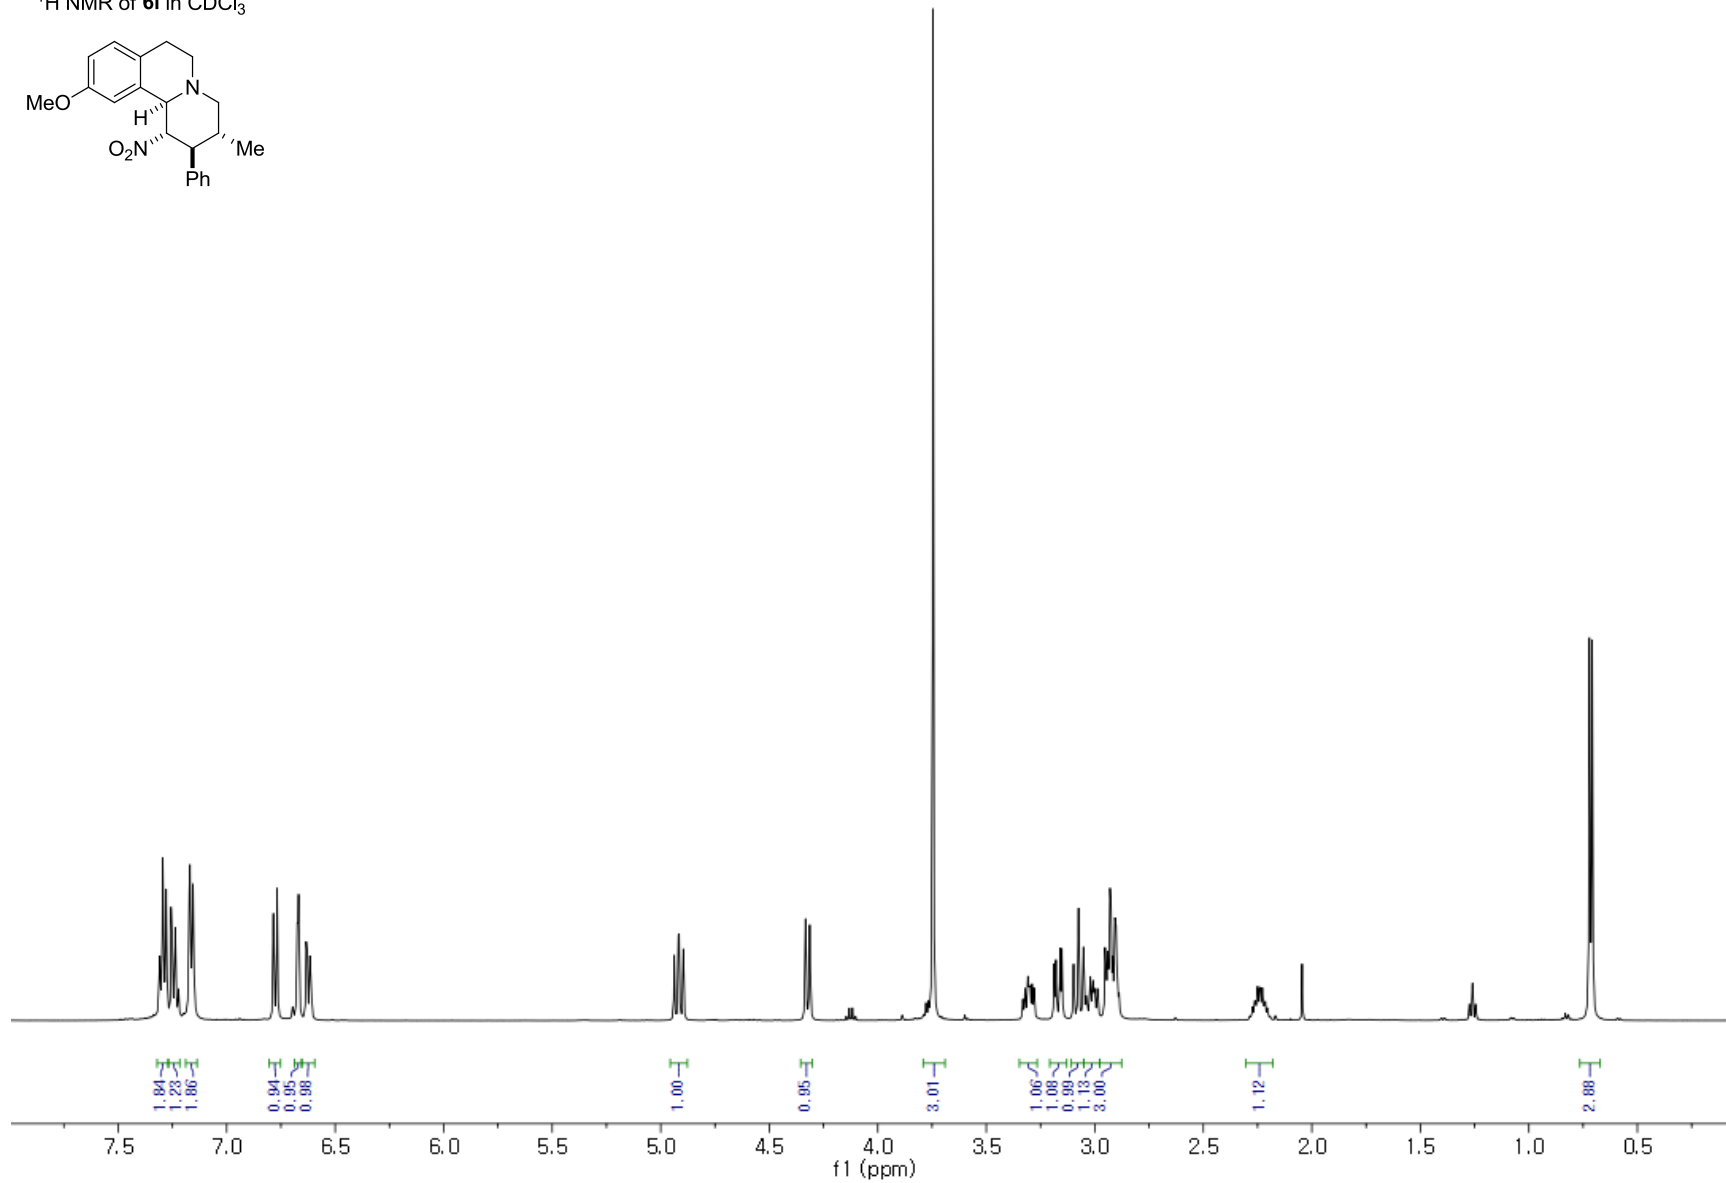

$^{13}\text{C}$  NMR of **6i** in  $\text{CDCl}_3$

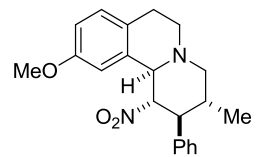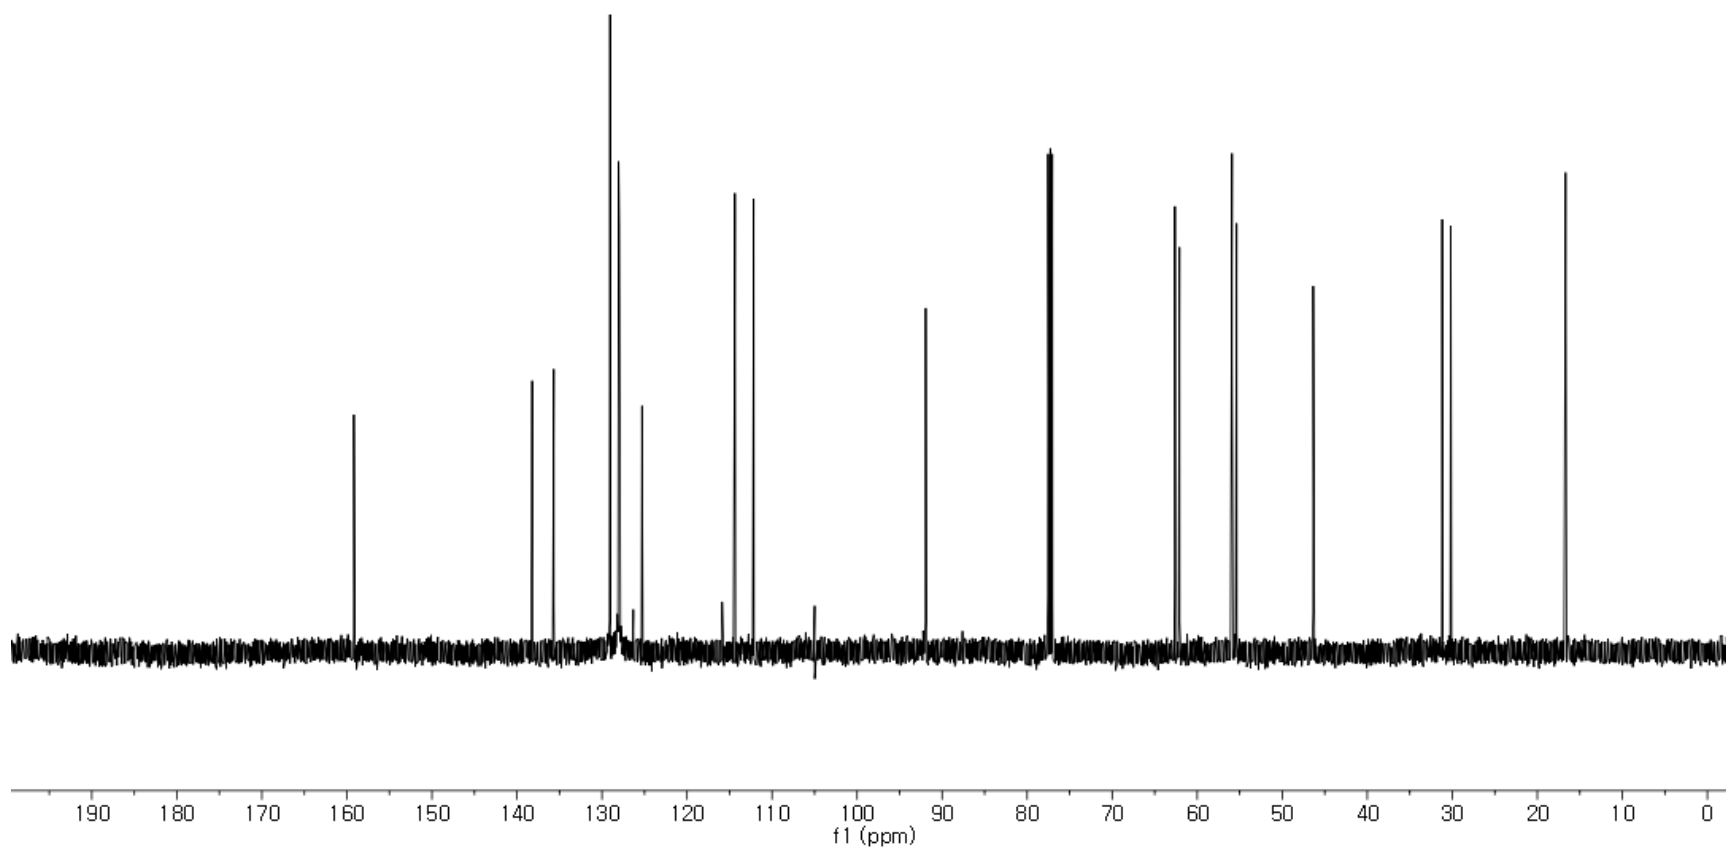

$^1\text{H}$  NMR of **7i** in  $\text{CDCl}_3$

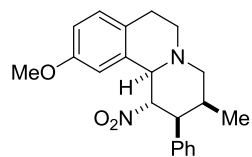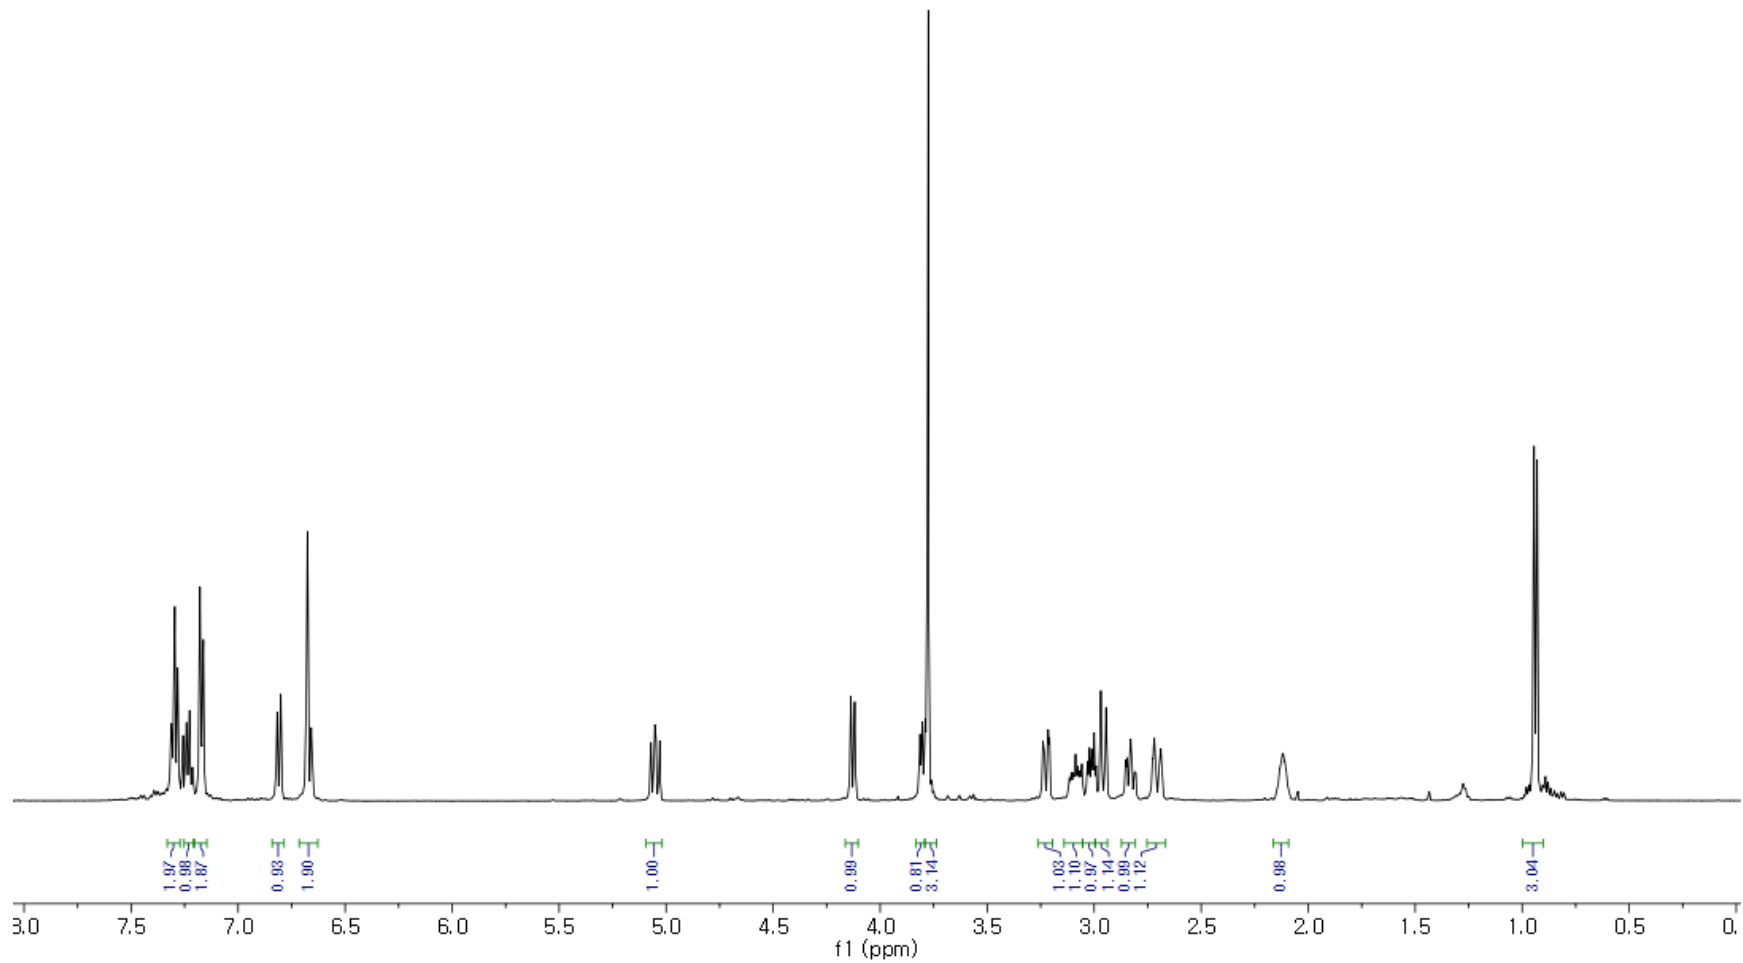

$^{13}\text{C}$  NMR of **7i** in  $\text{CDCl}_3$

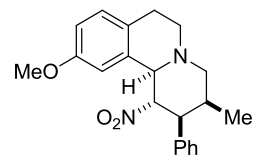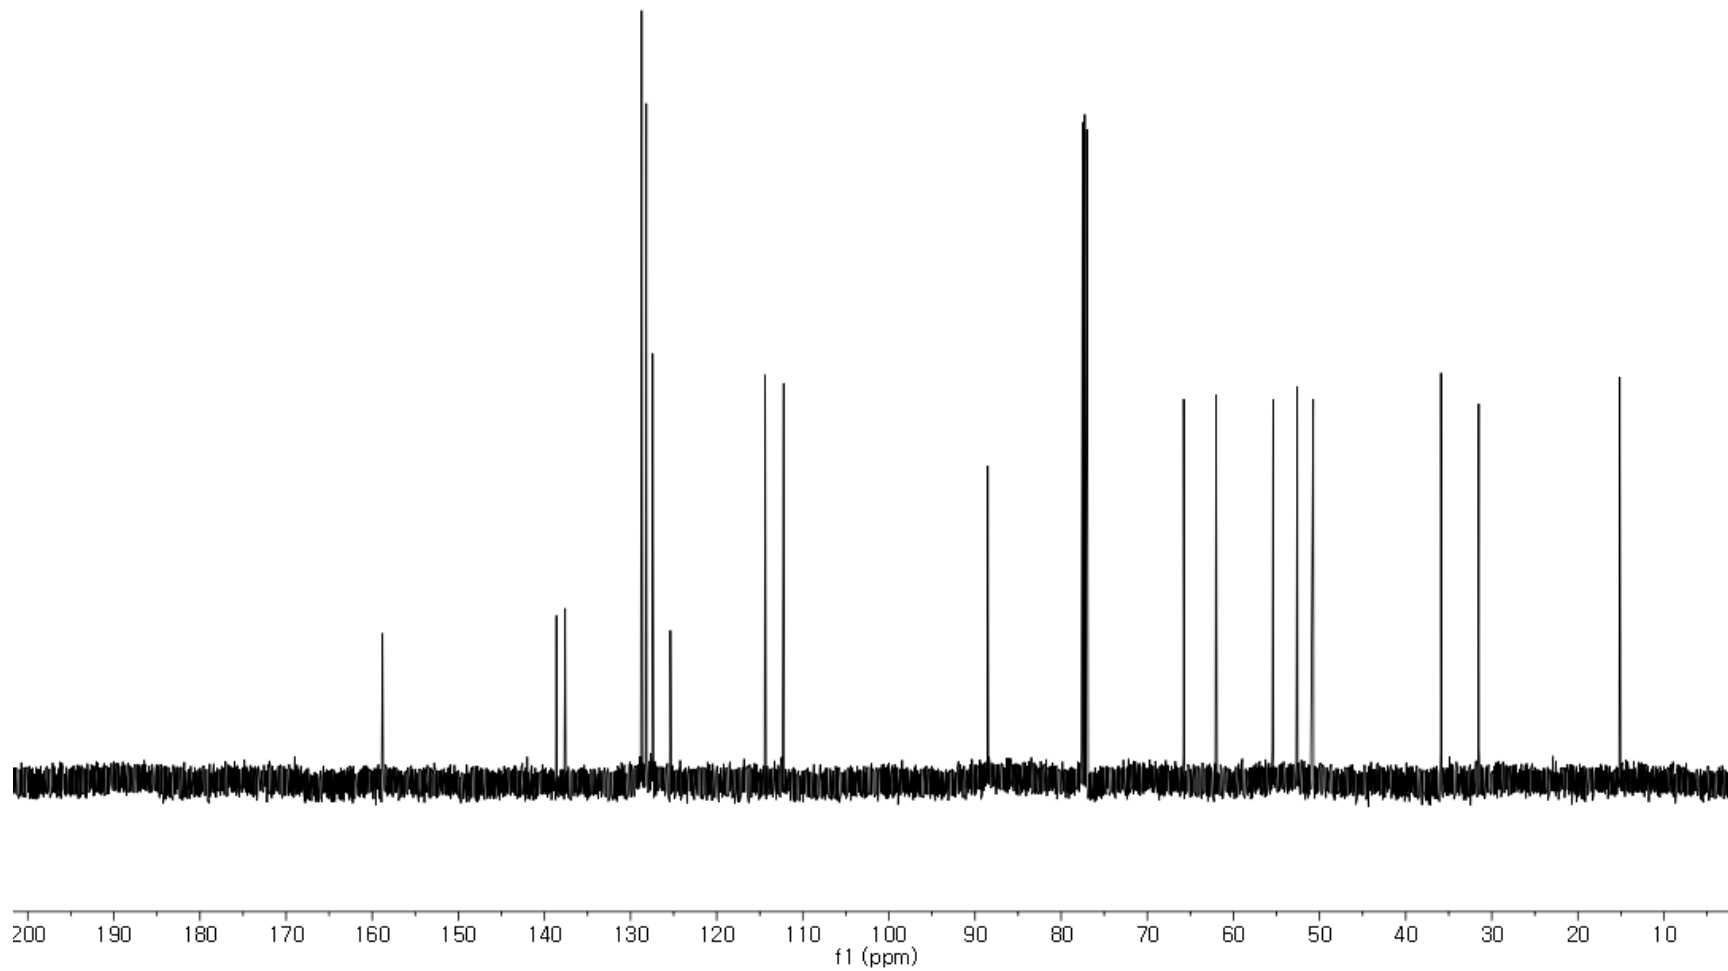

$^1\text{H}$  NMR of **6j** in  $\text{CDCl}_3$

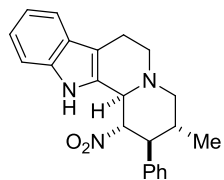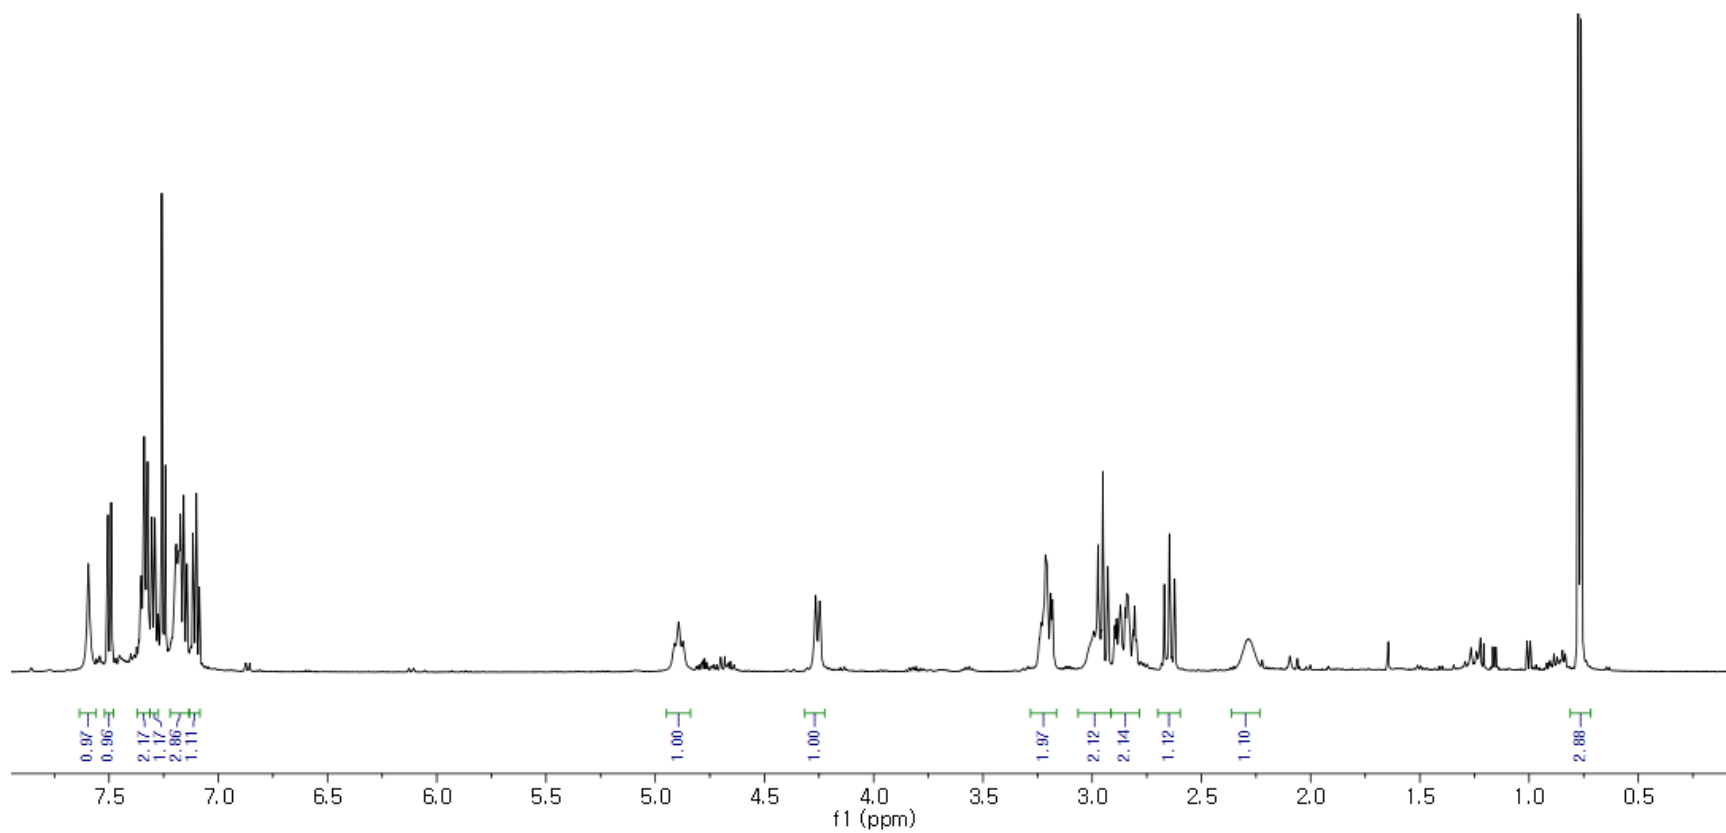



$^{13}\text{C}$  NMR of **6j** in  $\text{CDCl}_3$

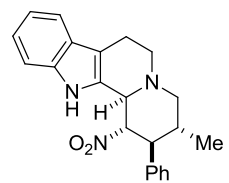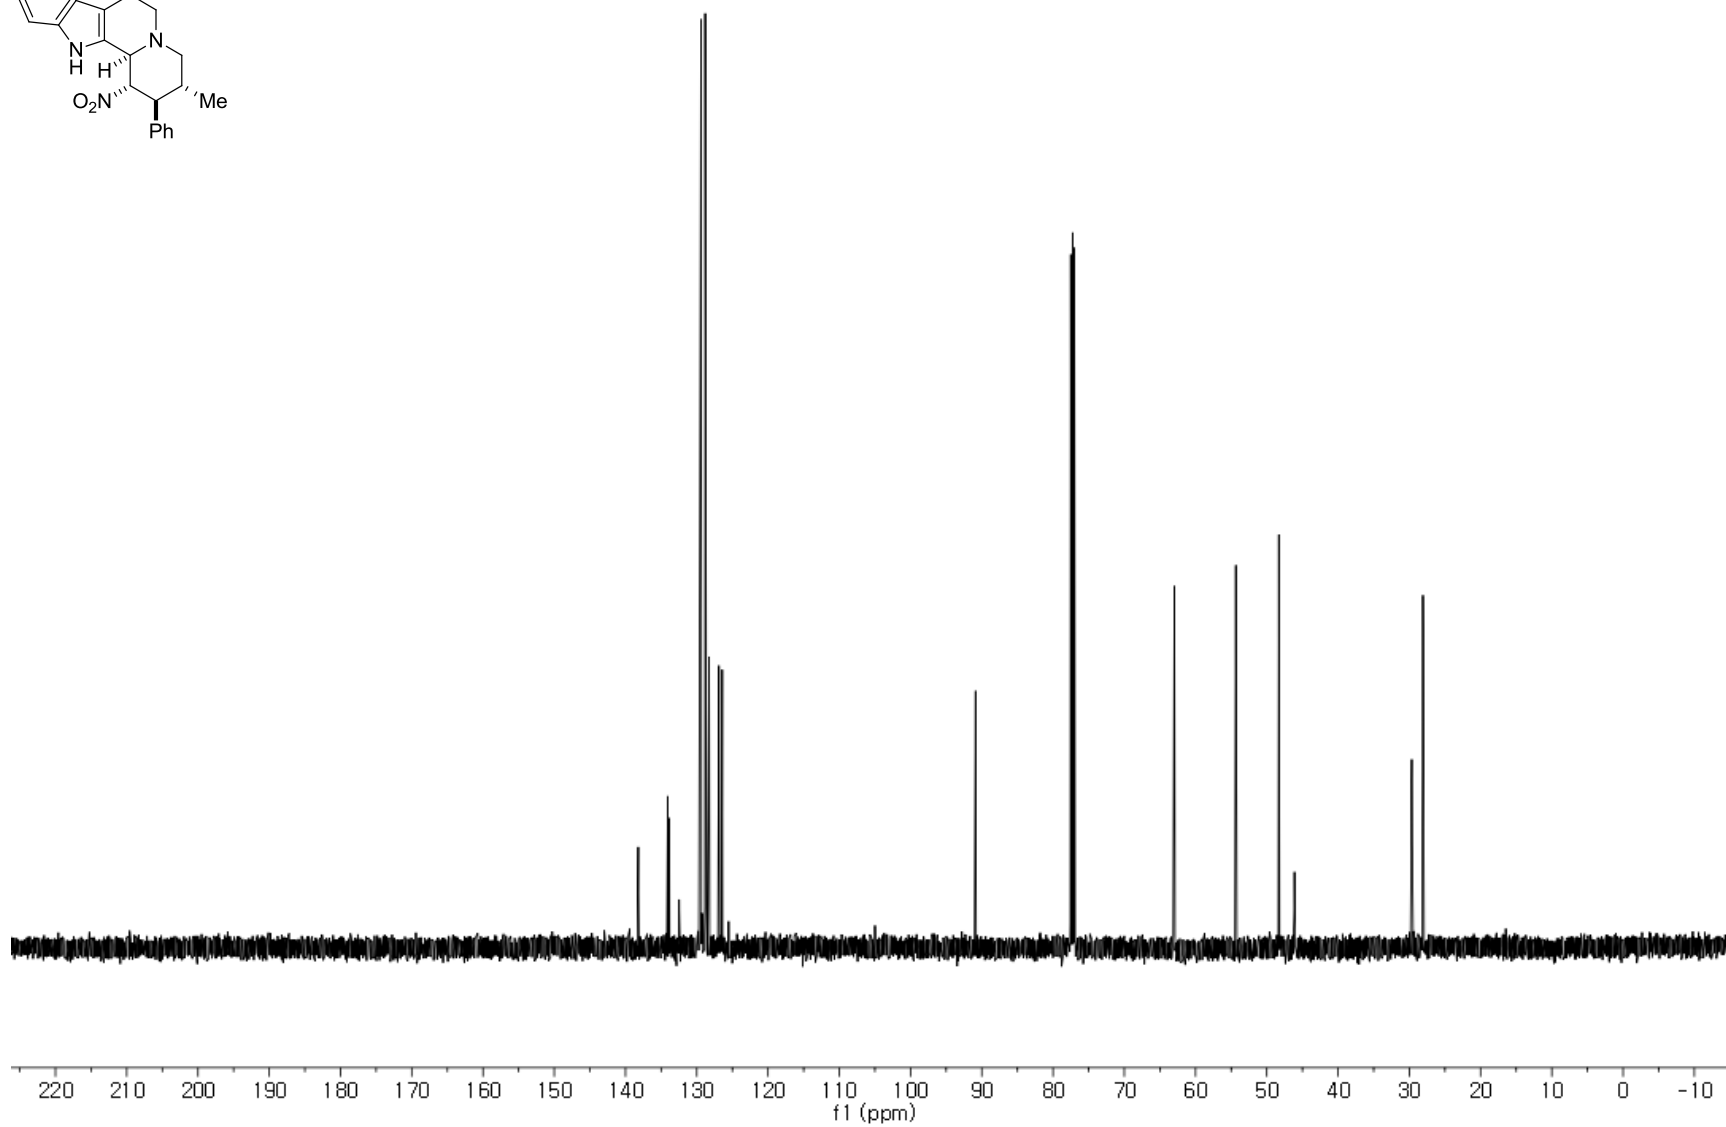

<sup>1</sup>H NMR of 7j in CDCl<sub>3</sub>

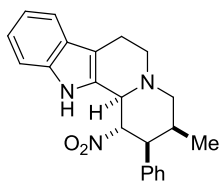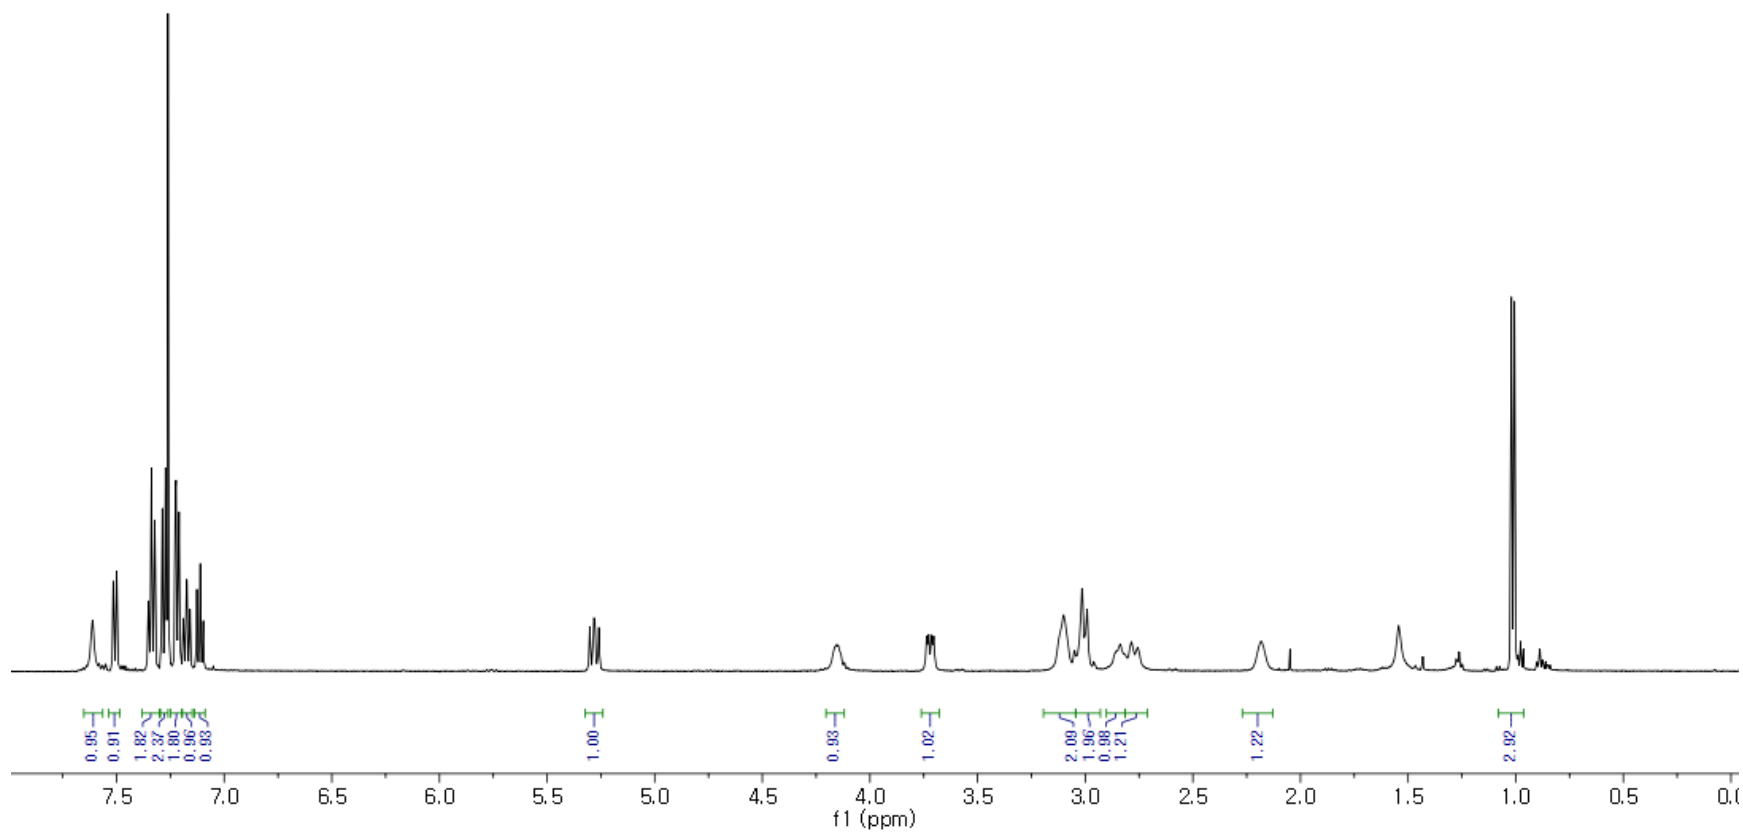

$^{13}\text{C}$  NMR of **7j** in  $\text{CDCl}_3$

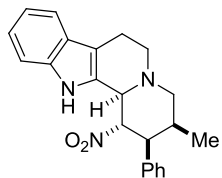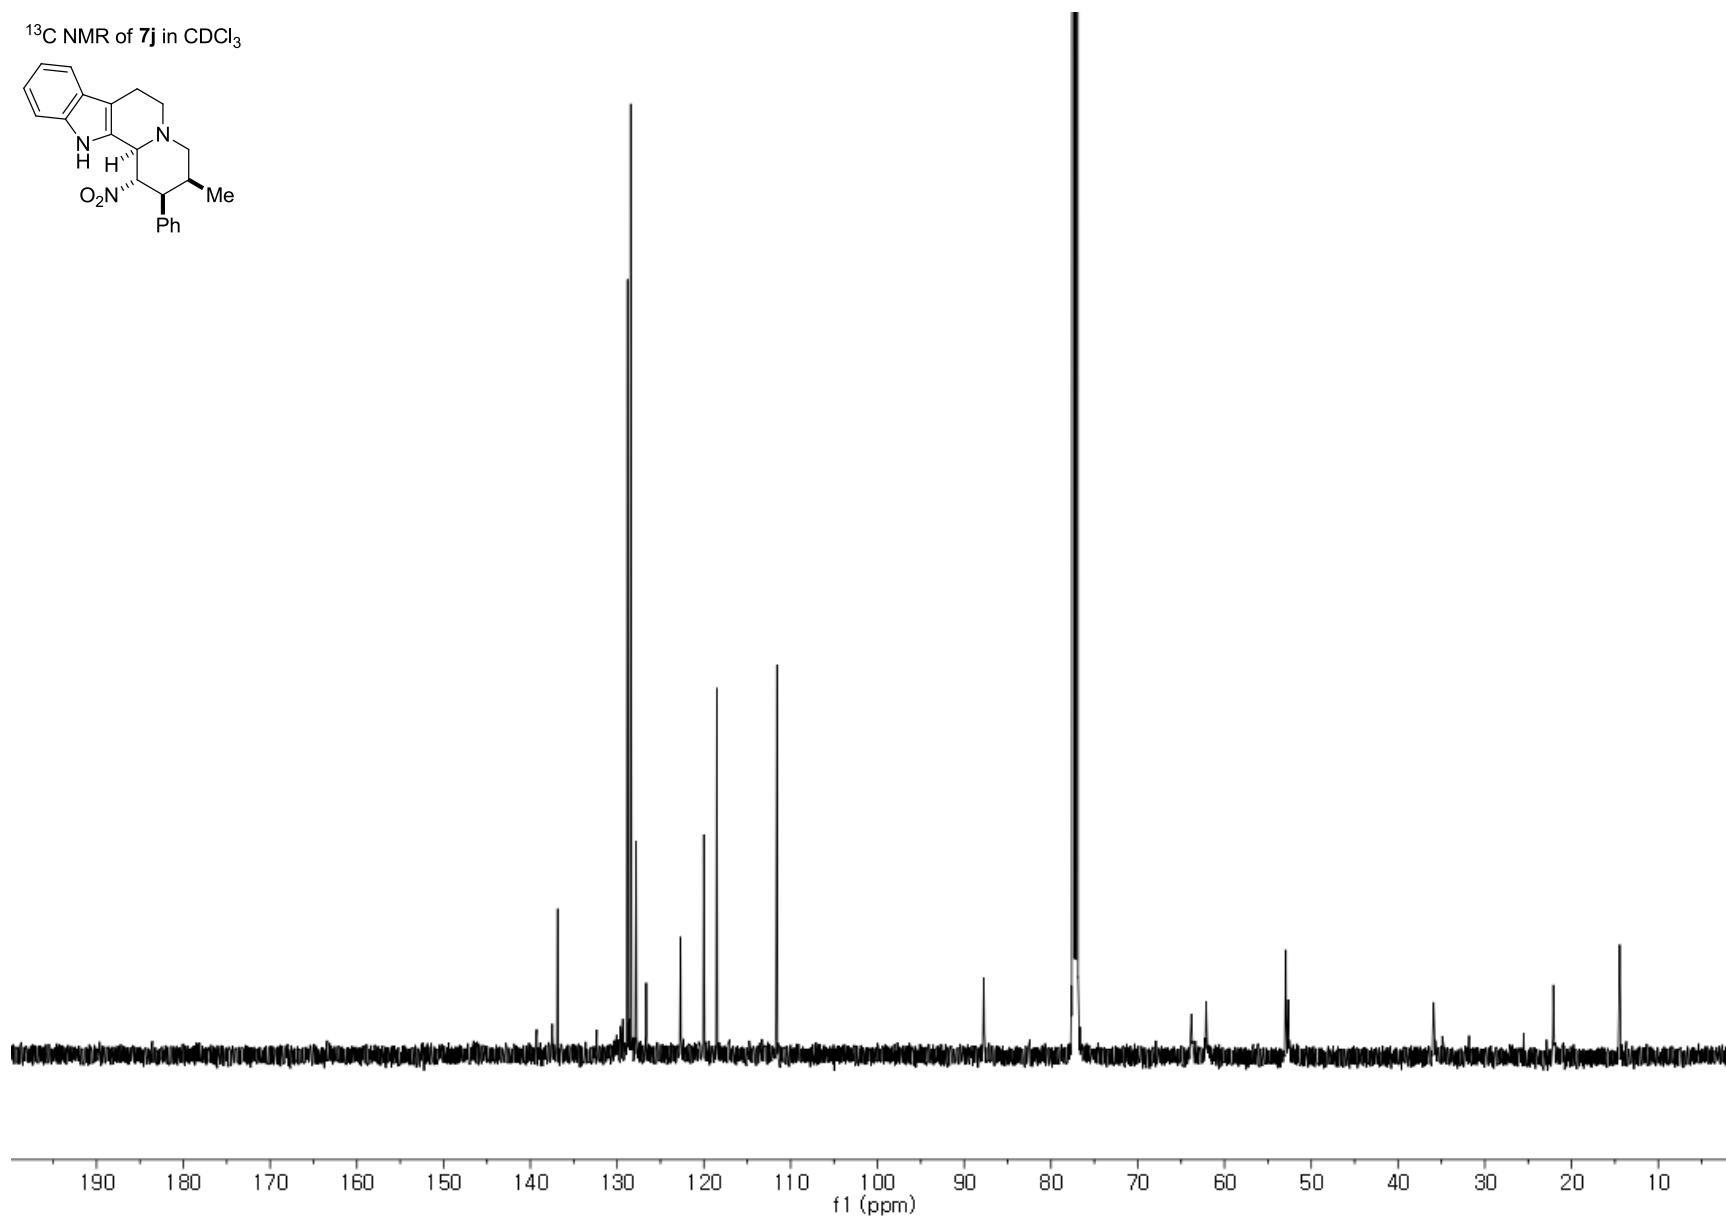

<sup>1</sup>H NMR of **6k** in CDCl<sub>3</sub>

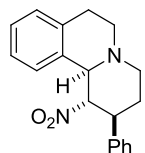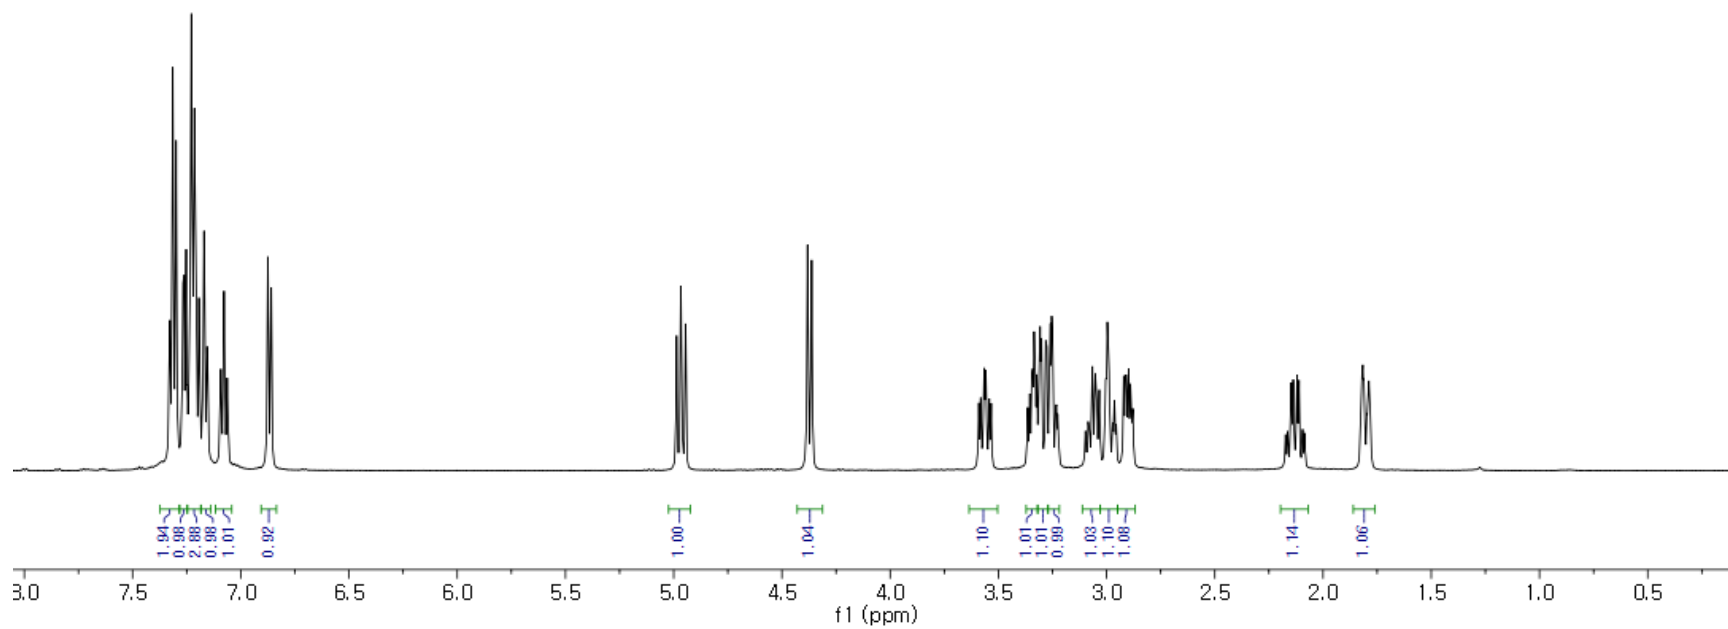

$^{13}\text{C}$  NMR of **6k** in  $\text{CDCl}_3$

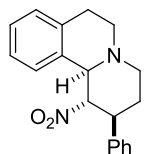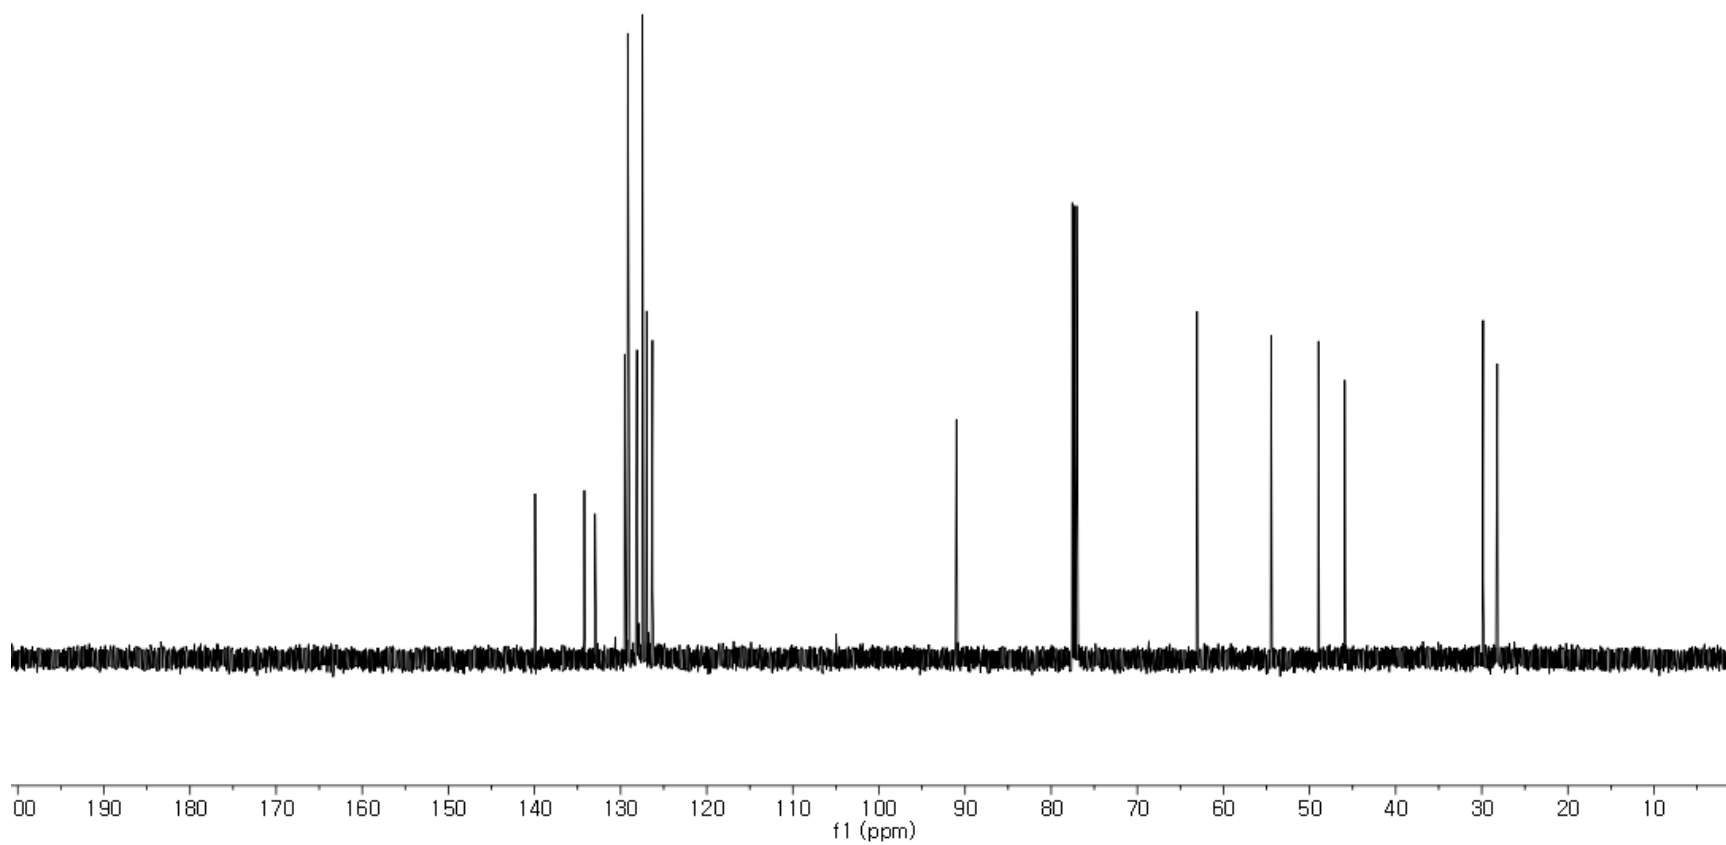

$^1\text{H}$  NMR of **6l** in  $\text{CDCl}_3$

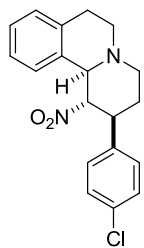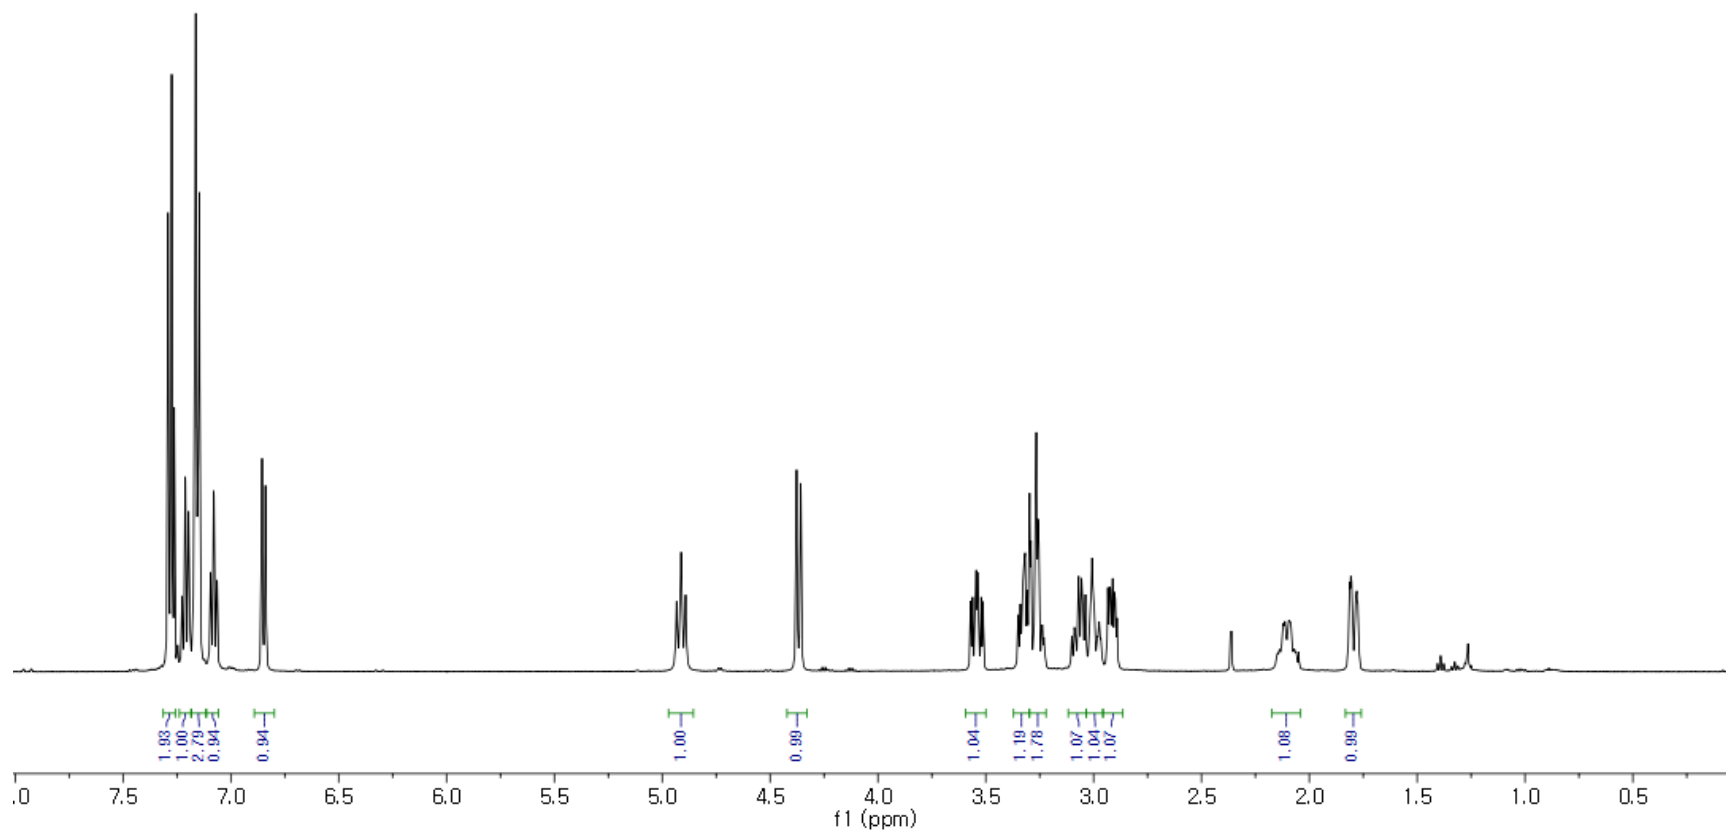

$^{13}\text{C}$  NMR of **6l** in  $\text{CDCl}_3$

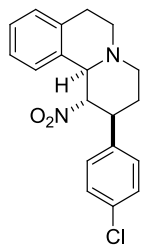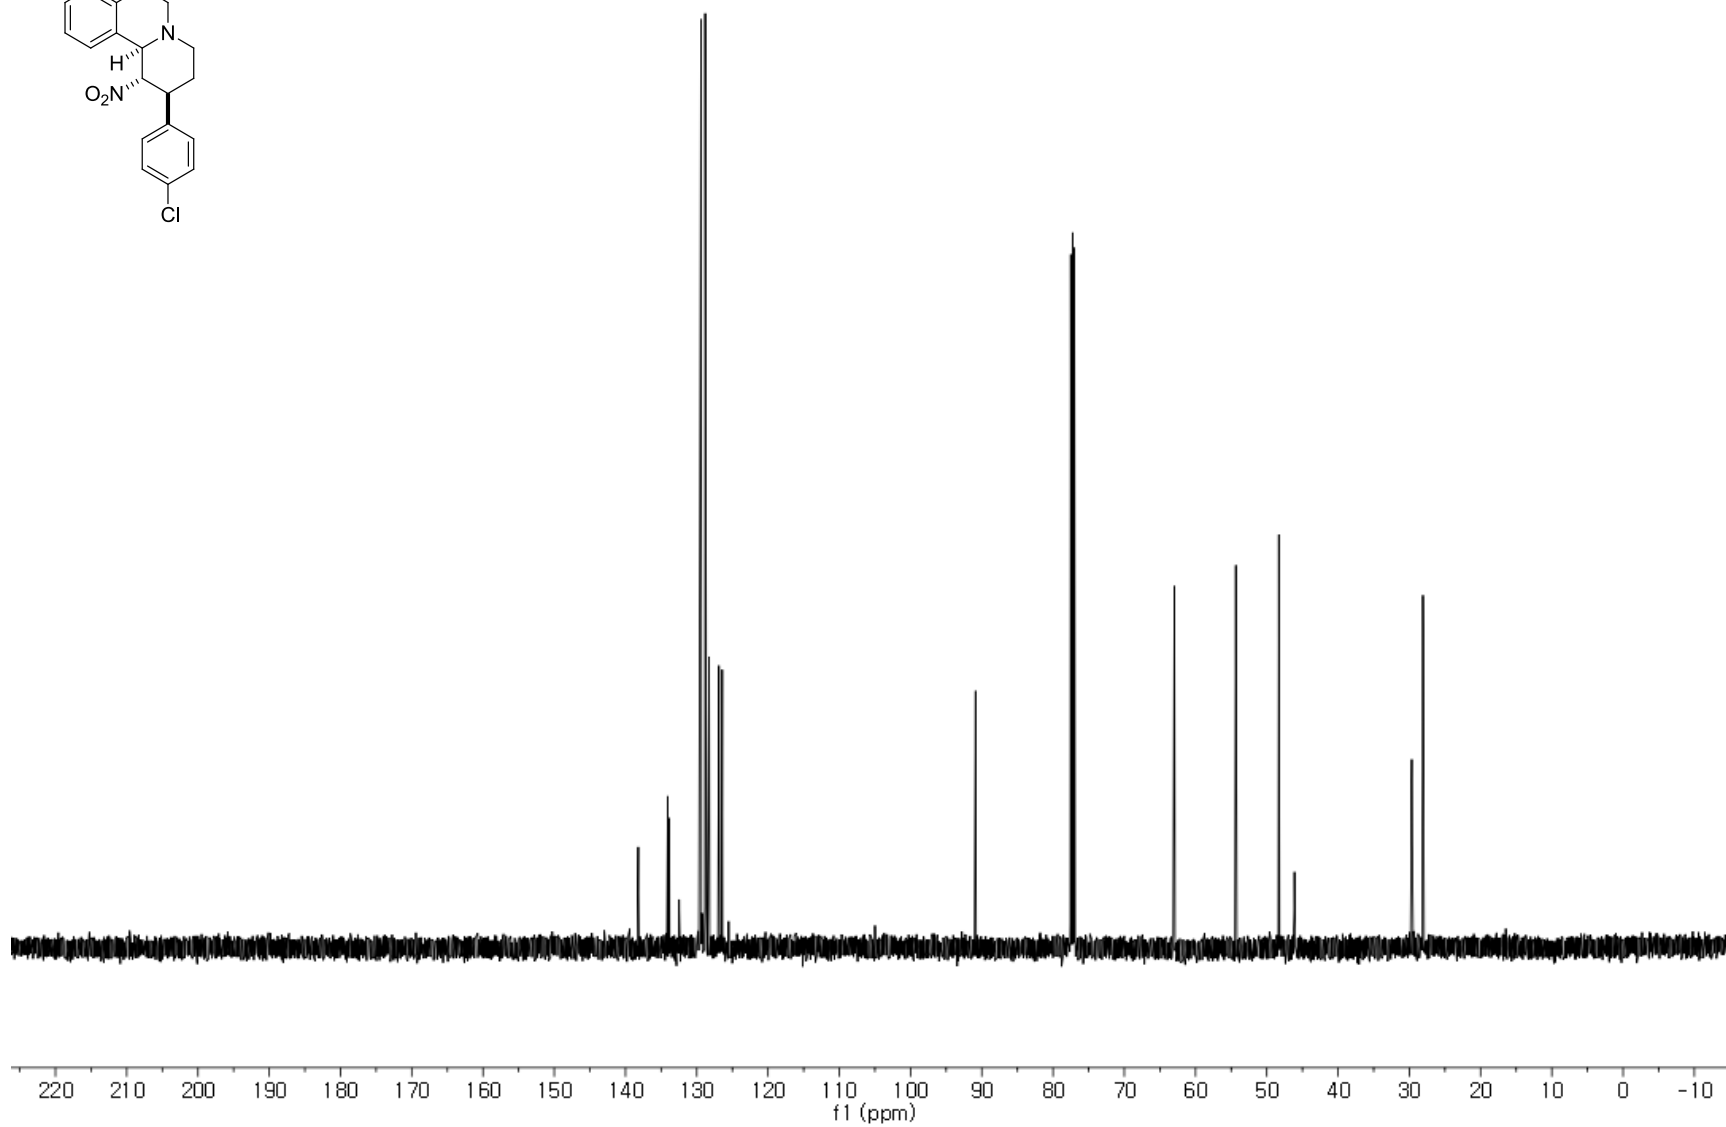

$^1\text{H}$  NMR of **6m** in  $\text{CDCl}_3$

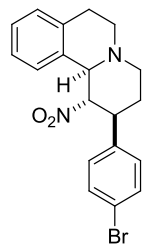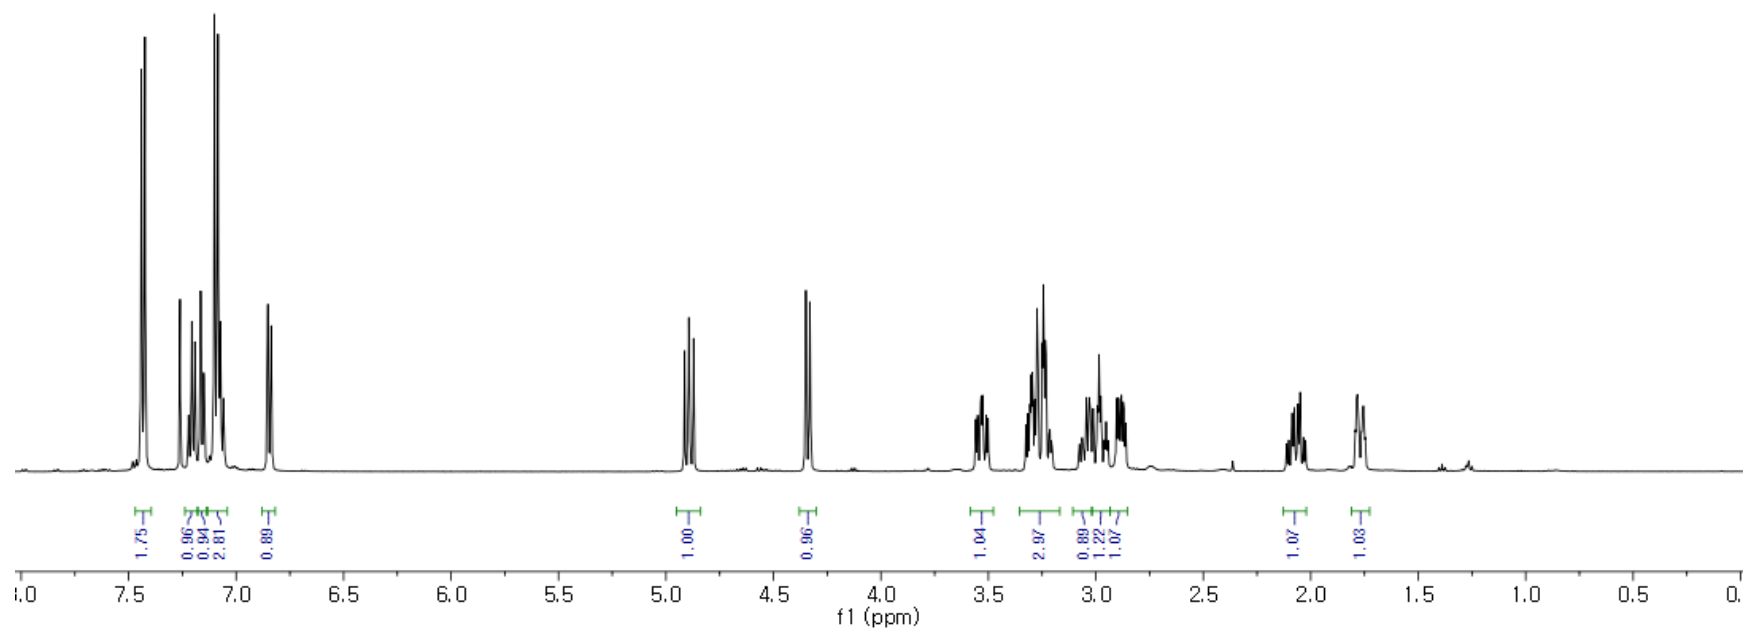



$^{13}\text{C}$  NMR of **6m** in  $\text{CDCl}_3$

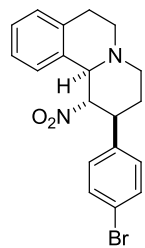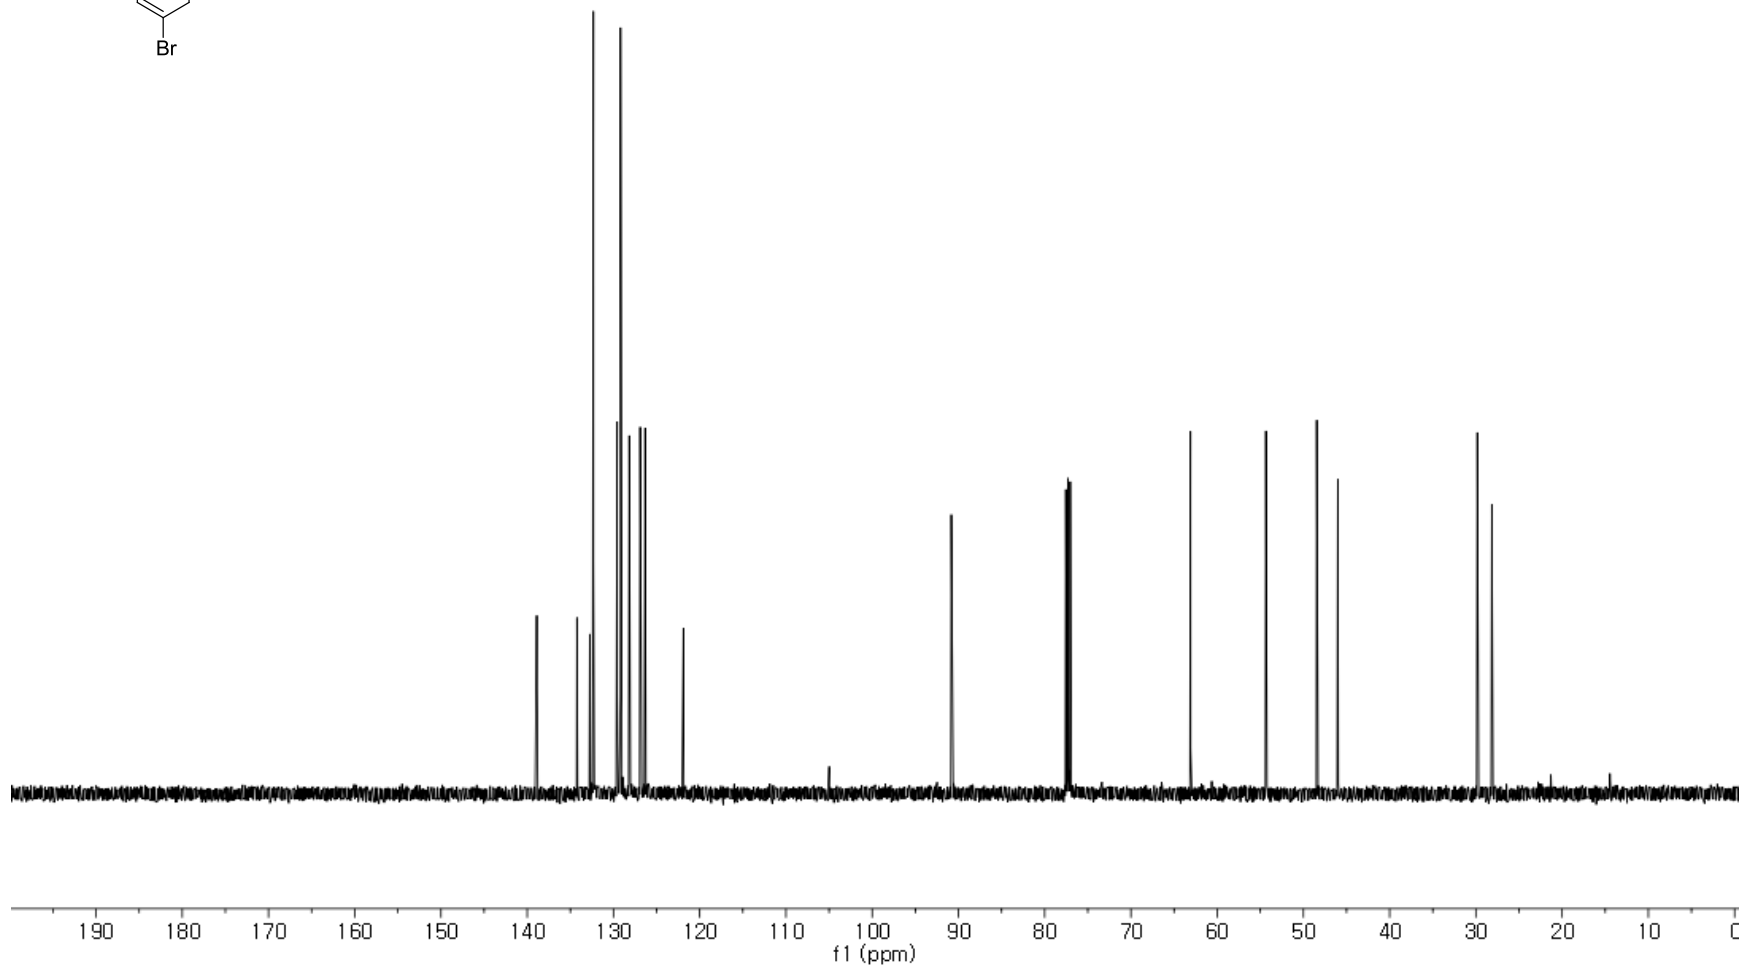

$^1\text{H}$  NMR of **6n** in  $\text{CDCl}_3$

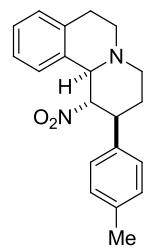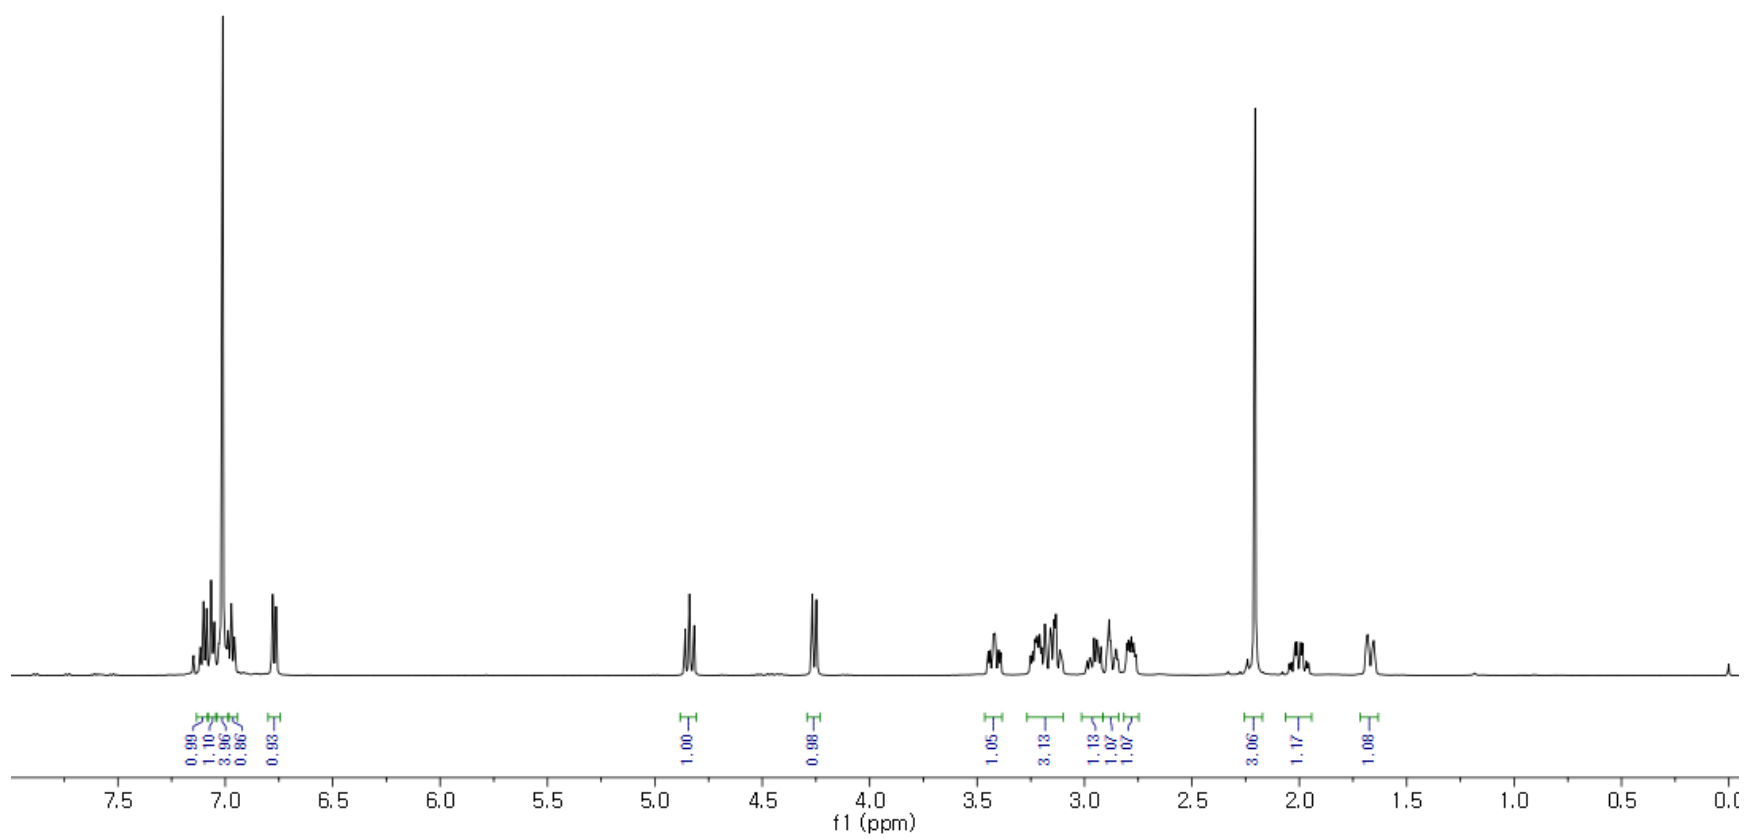

<sup>13</sup>C NMR of **6n** in CDCl<sub>3</sub>

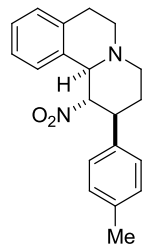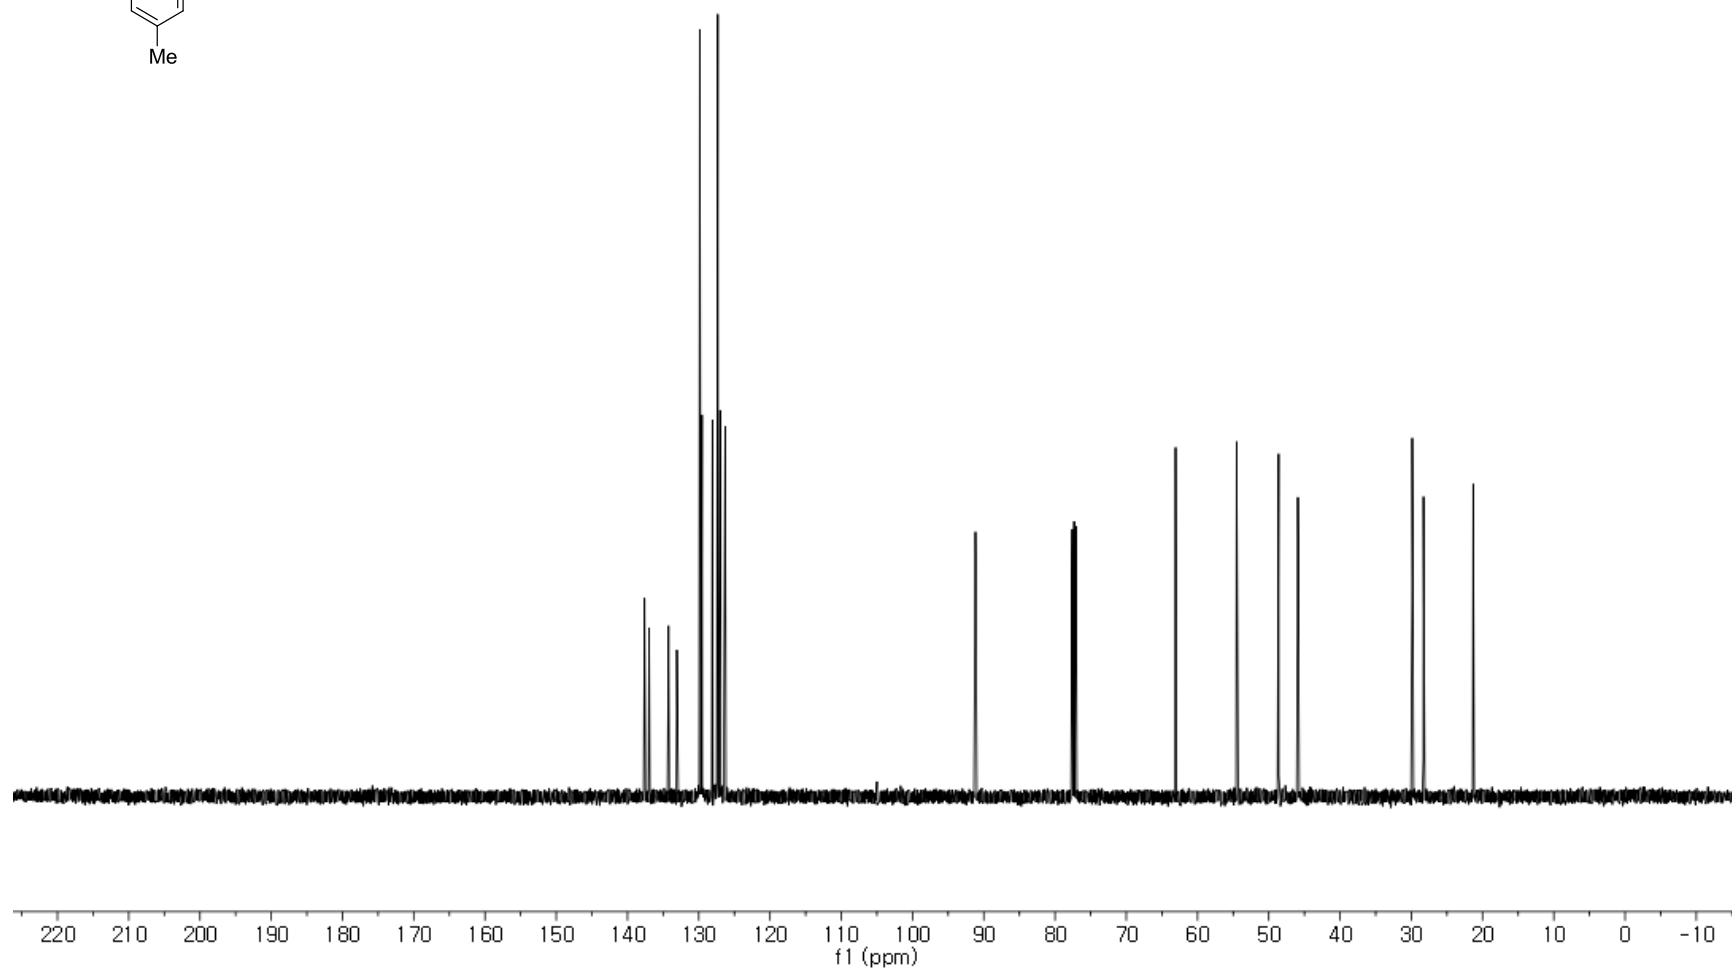

$^1\text{H}$  NMR of **6o** in  $\text{CDCl}_3$

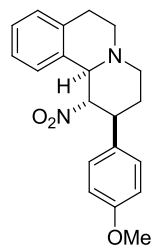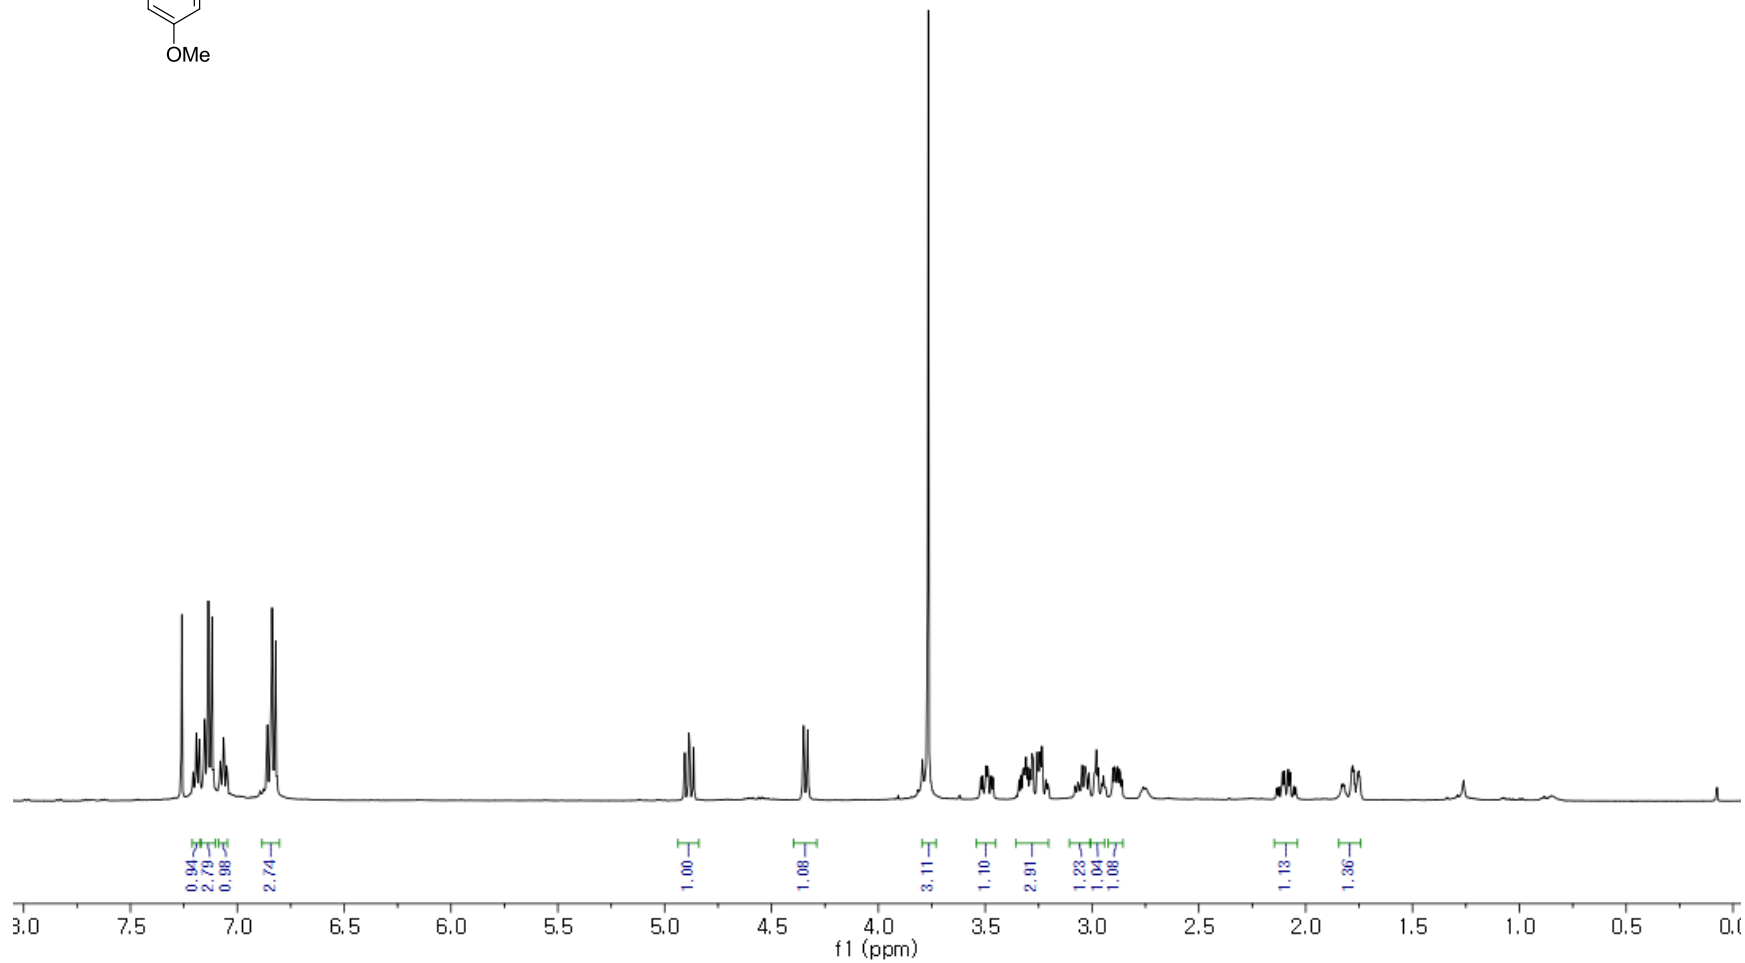

$^{13}\text{C}$  NMR of **6o** in  $\text{CDCl}_3$

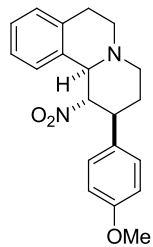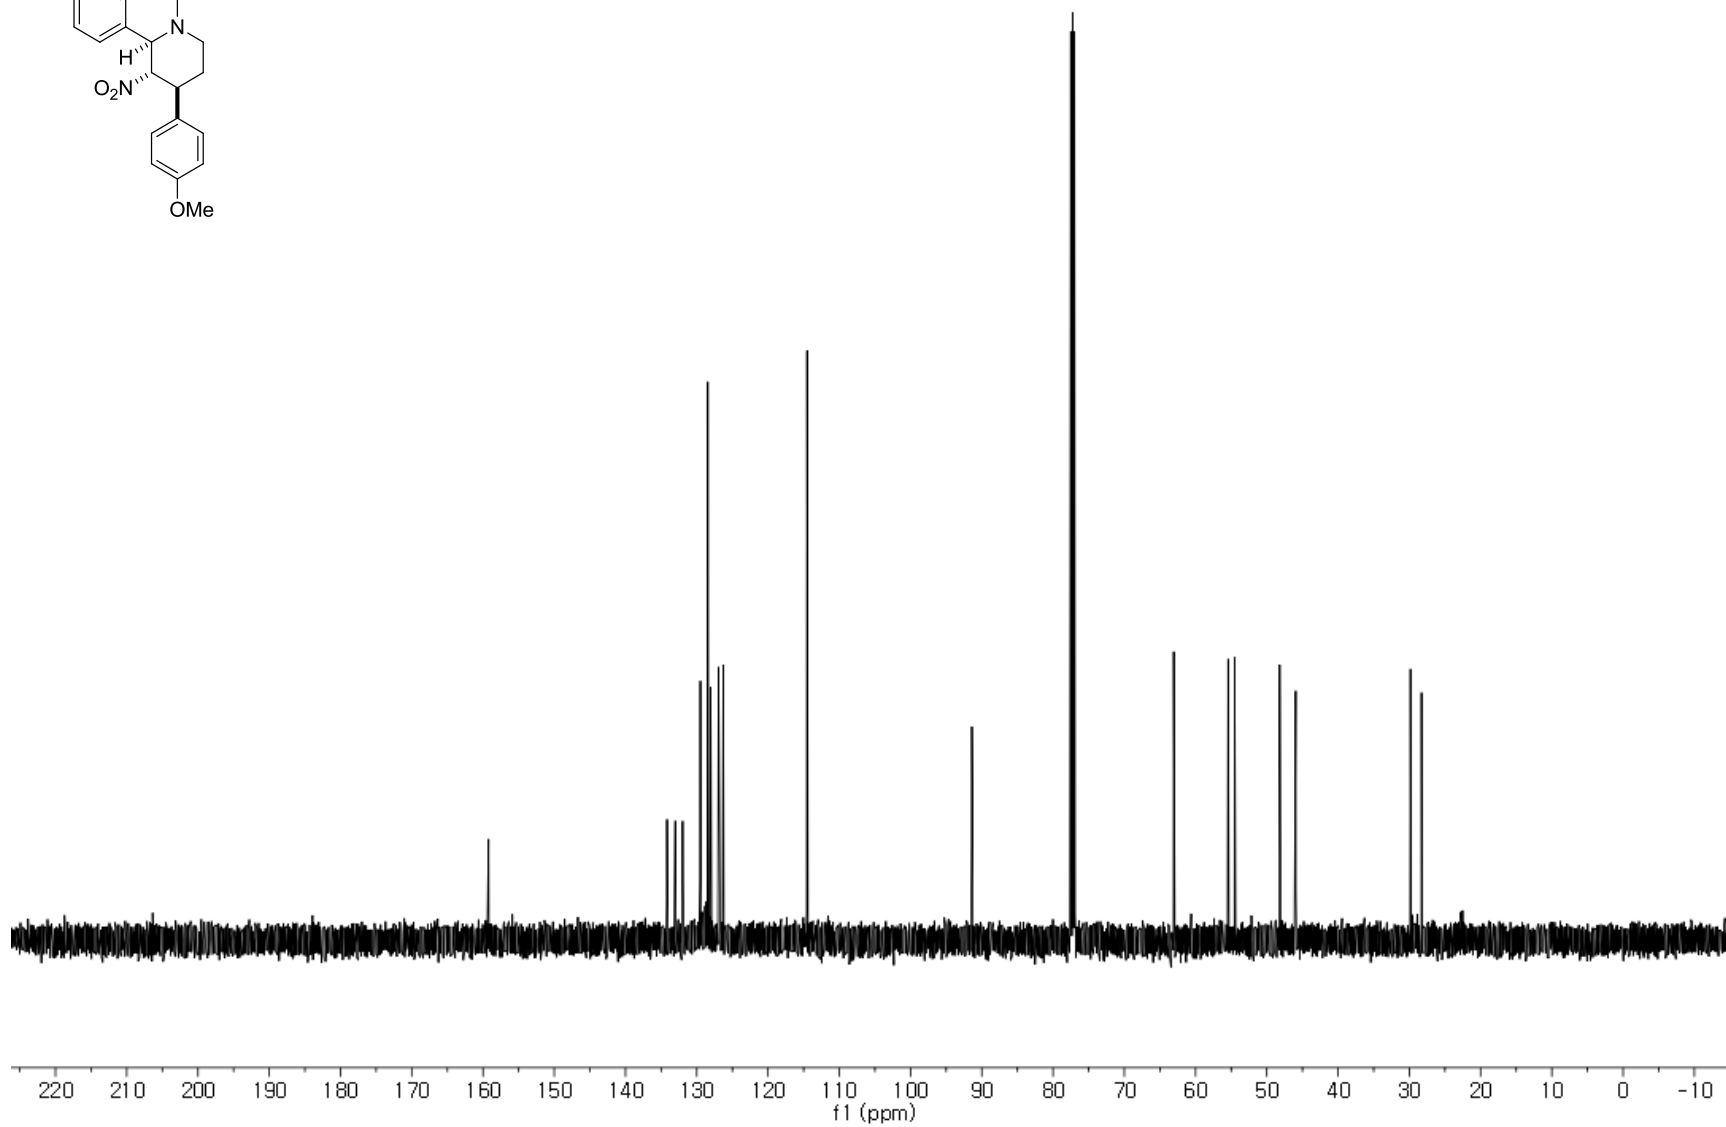

$^1\text{H}$  NMR of **6p** in  $\text{CD}_2\text{Cl}_2$

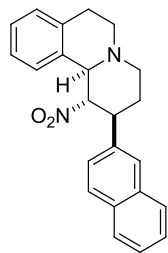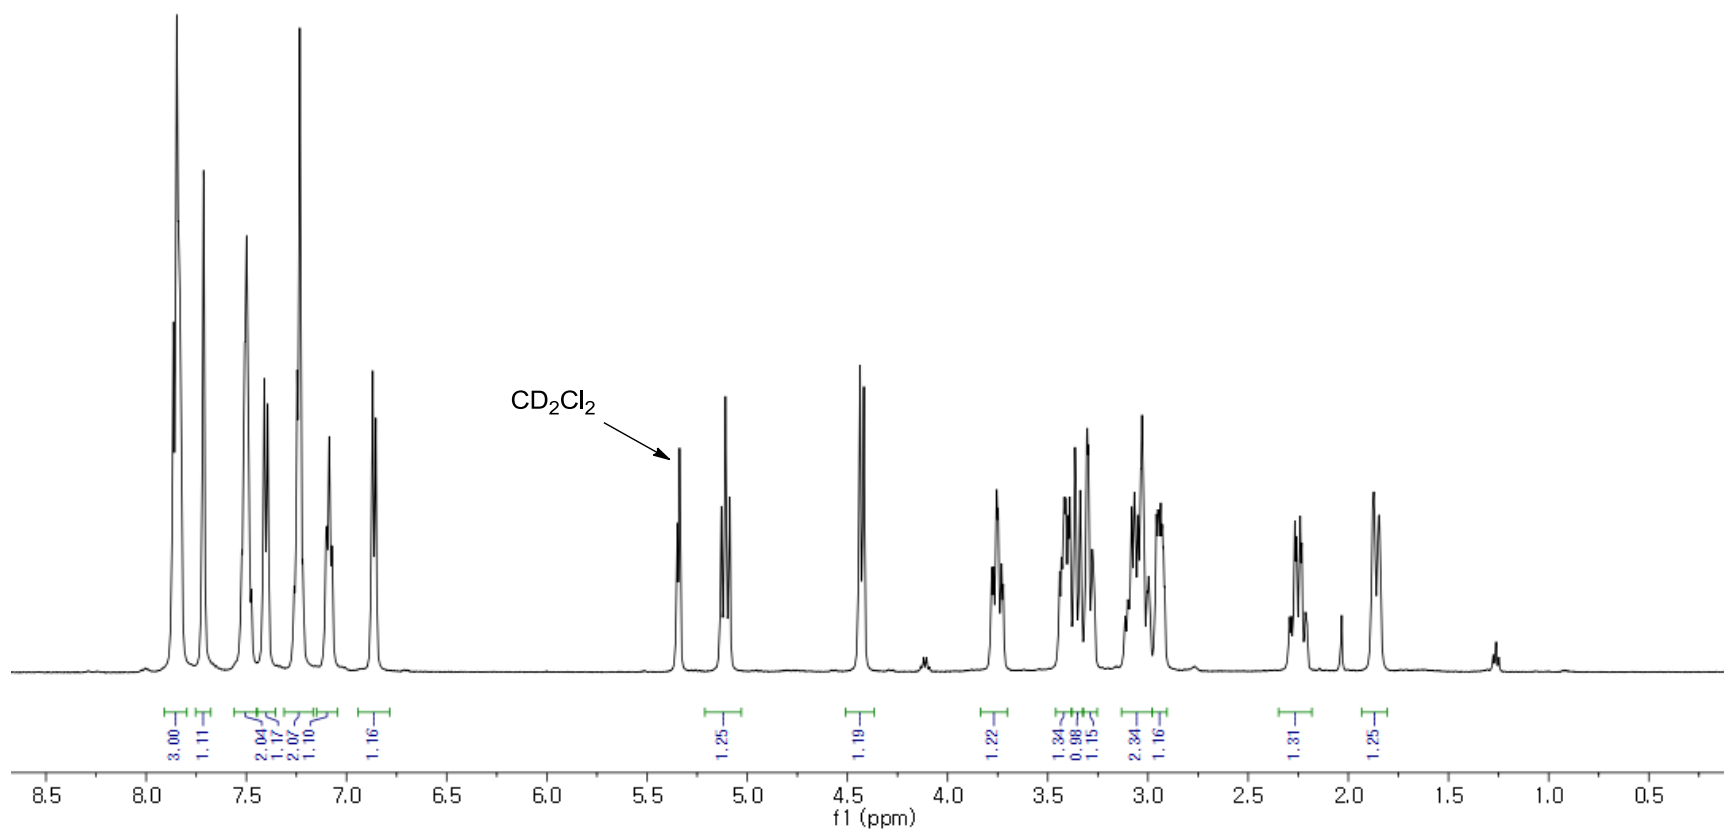

$^{13}\text{C}$  NMR of **6p** in  $\text{CD}_2\text{Cl}_2$

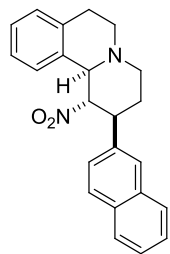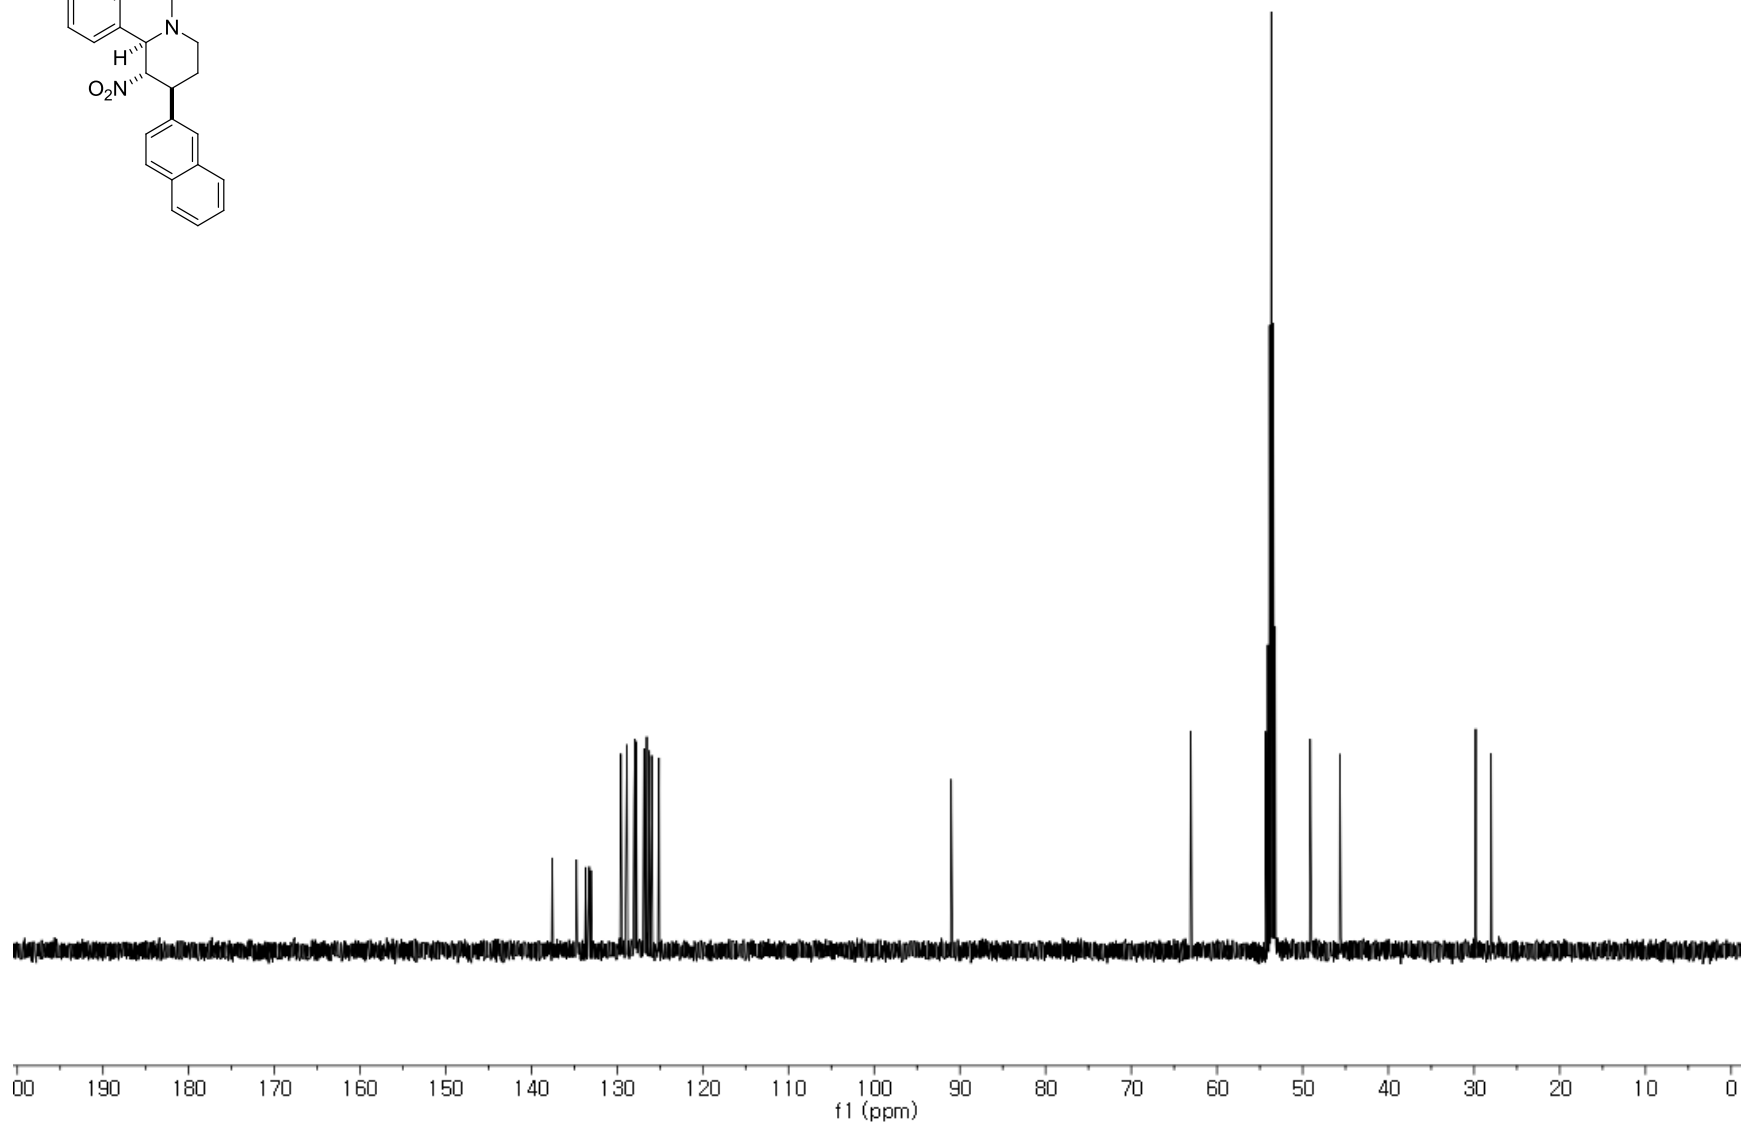

<sup>1</sup>H NMR of **6q** in CDCl<sub>3</sub>

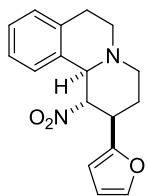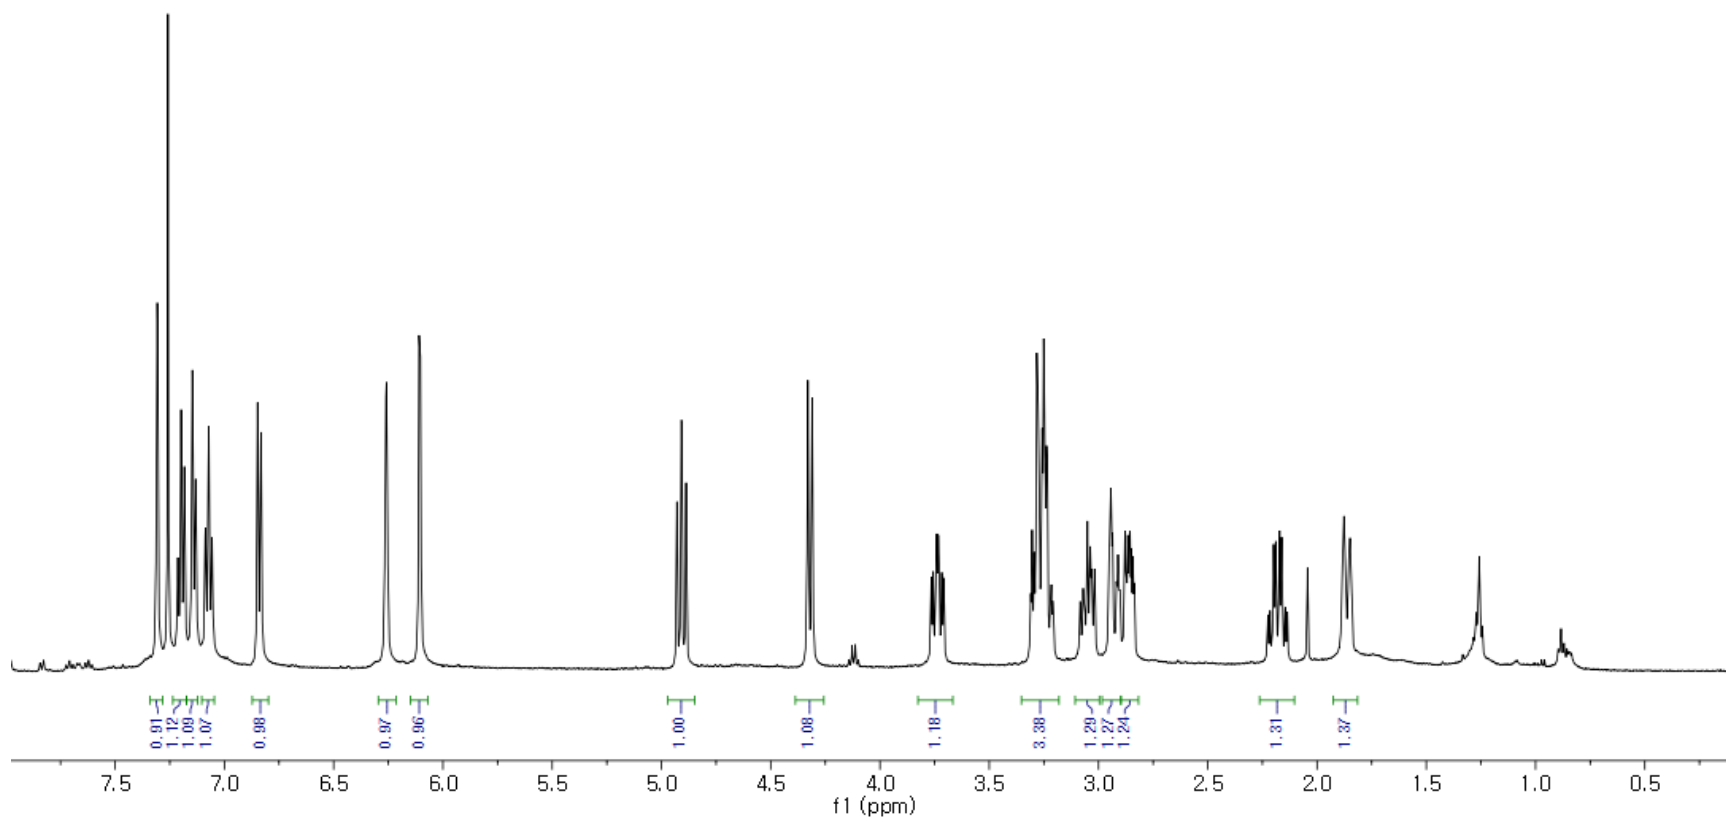



<sup>13</sup>C NMR of **6q** in CDCl<sub>3</sub>

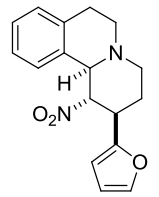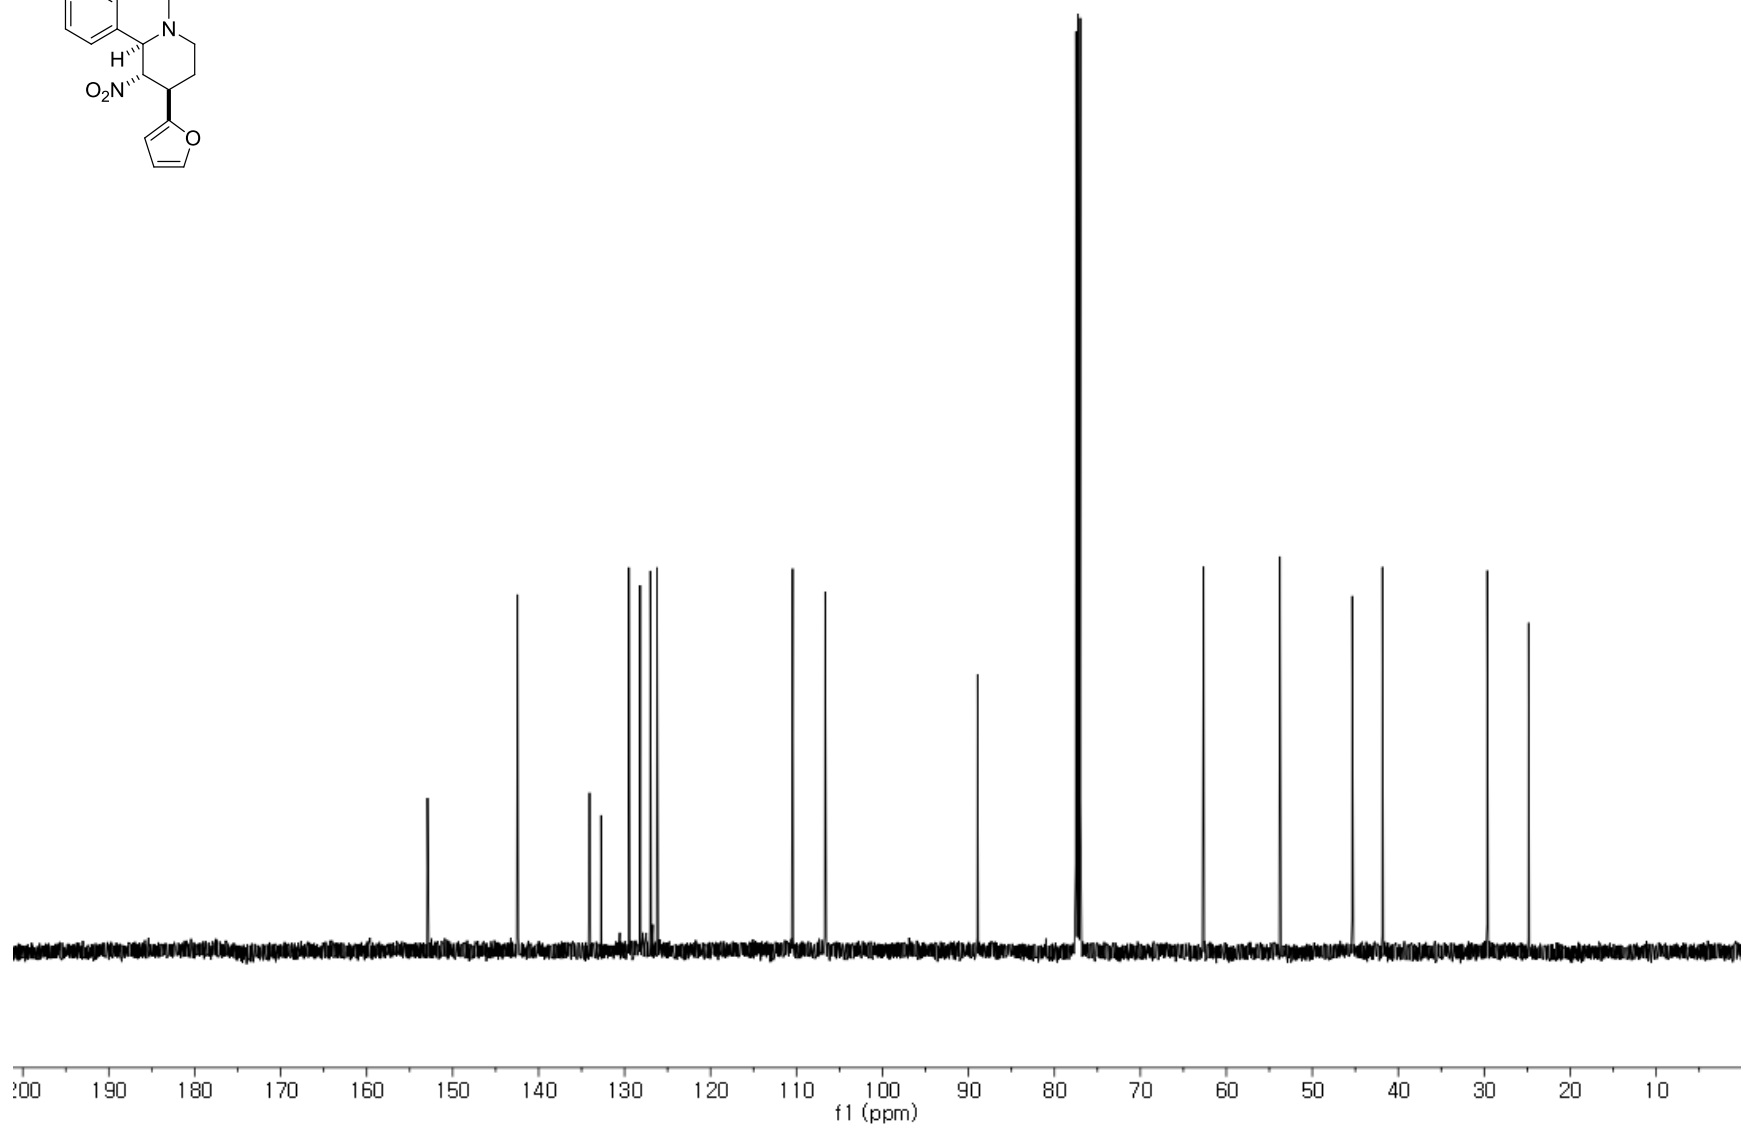



$^{13}\text{C}$  NMR of **6r** in  $\text{CDCl}_3$

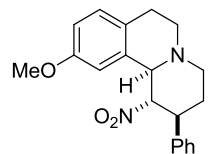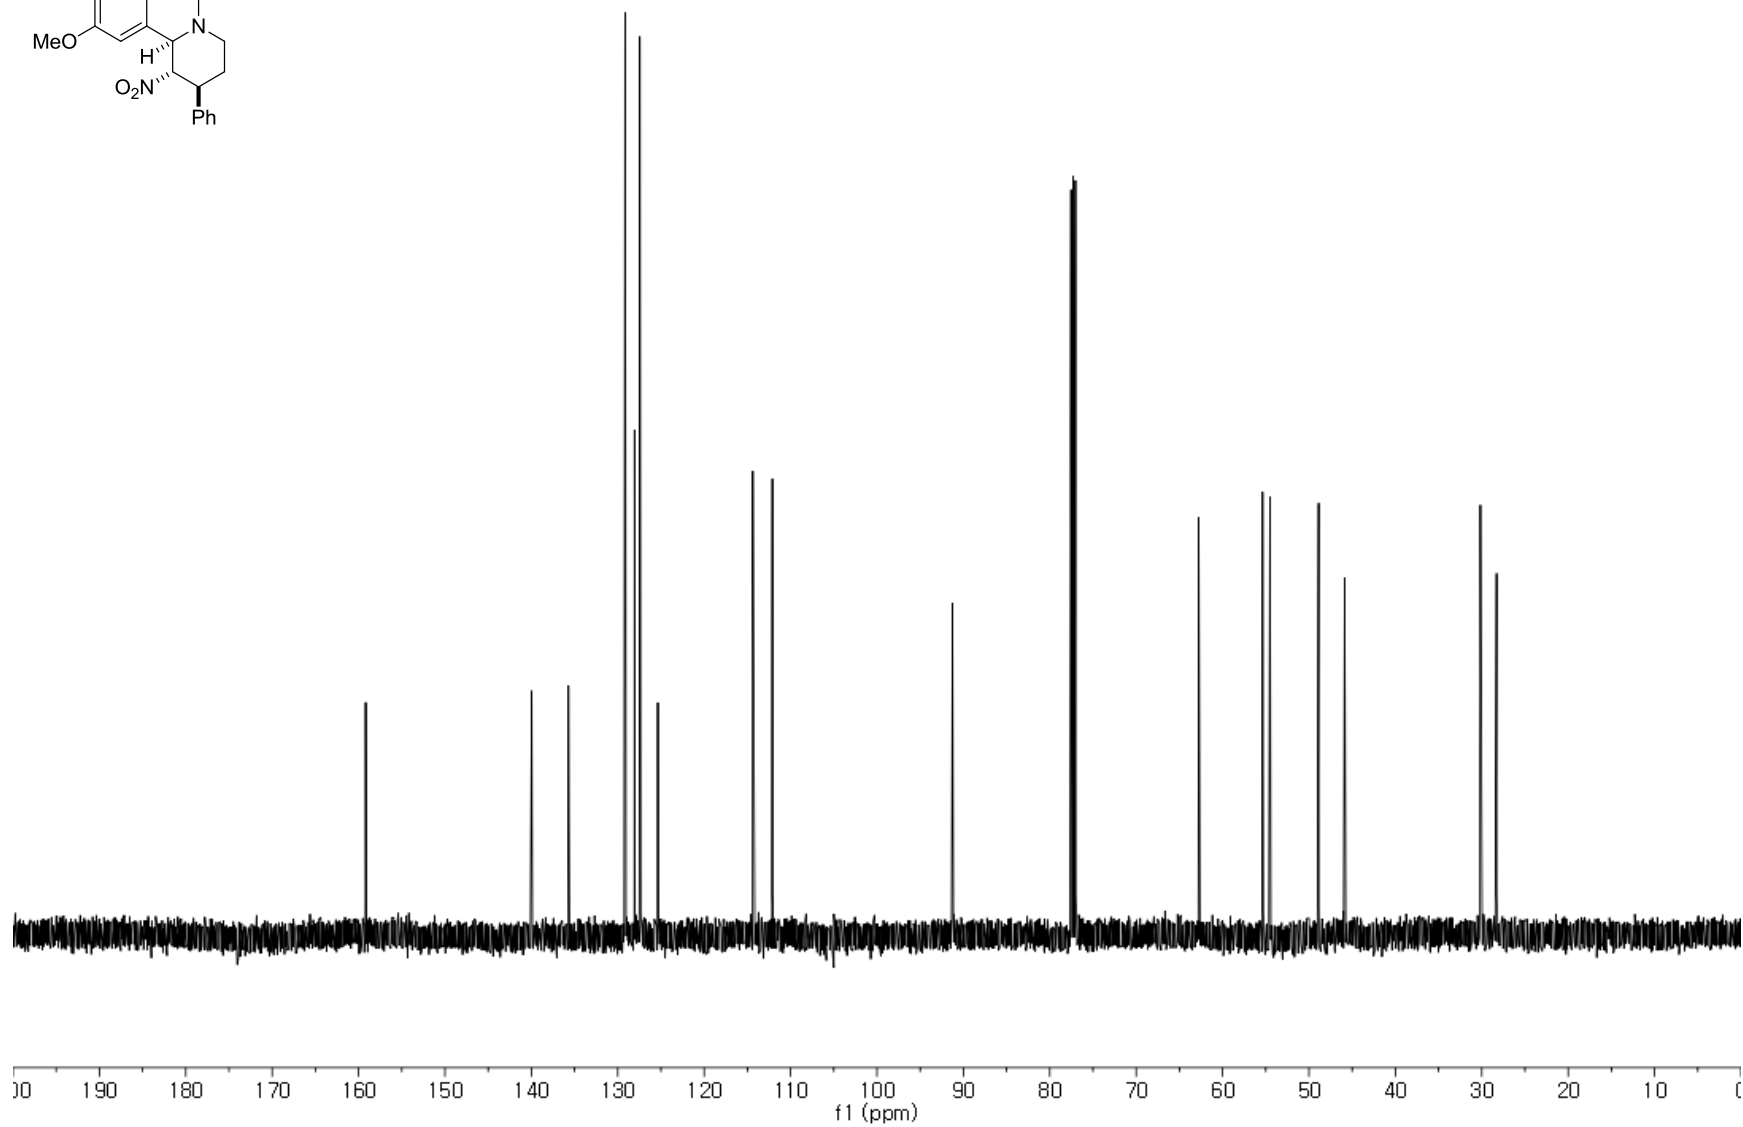



<sup>13</sup>C NMR of **6s** in CDCl<sub>3</sub>

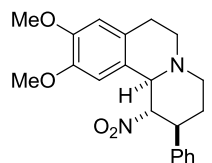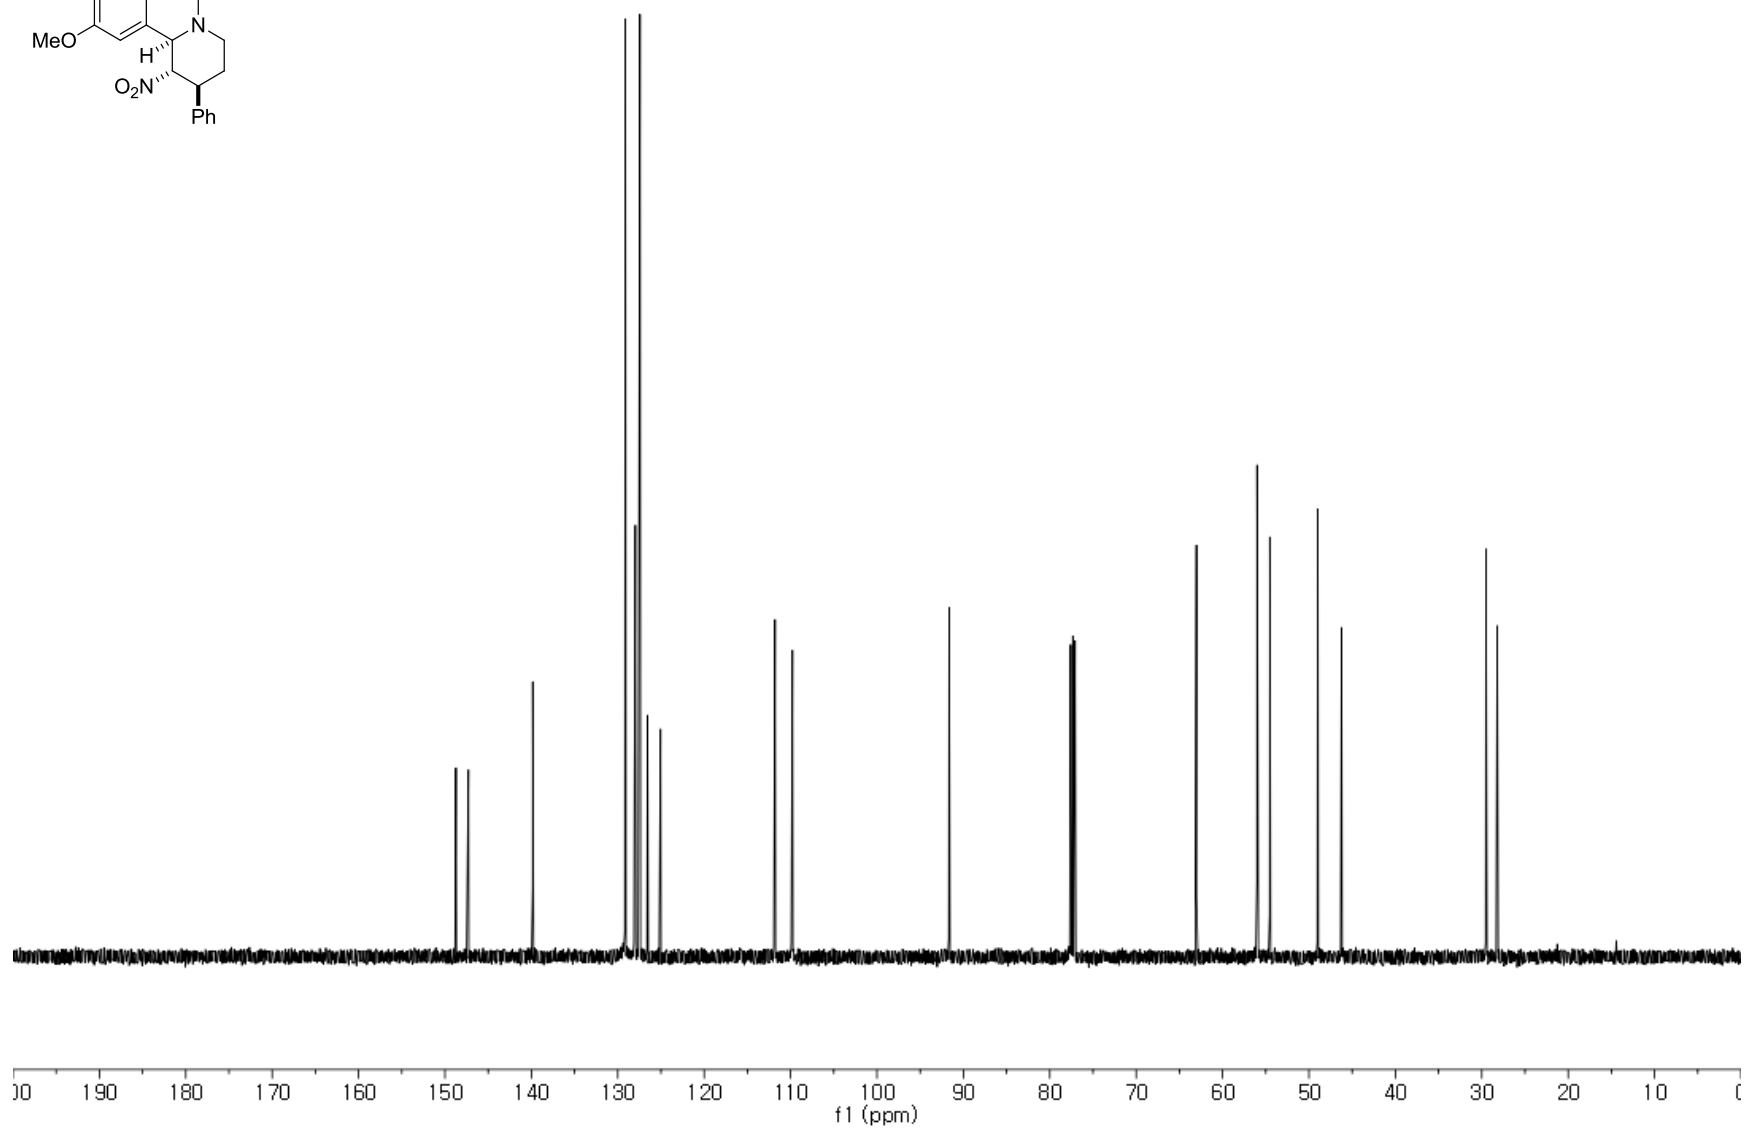

<sup>1</sup>H NMR of **6t** in CDCl<sub>3</sub>

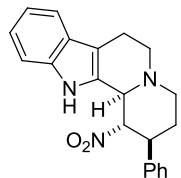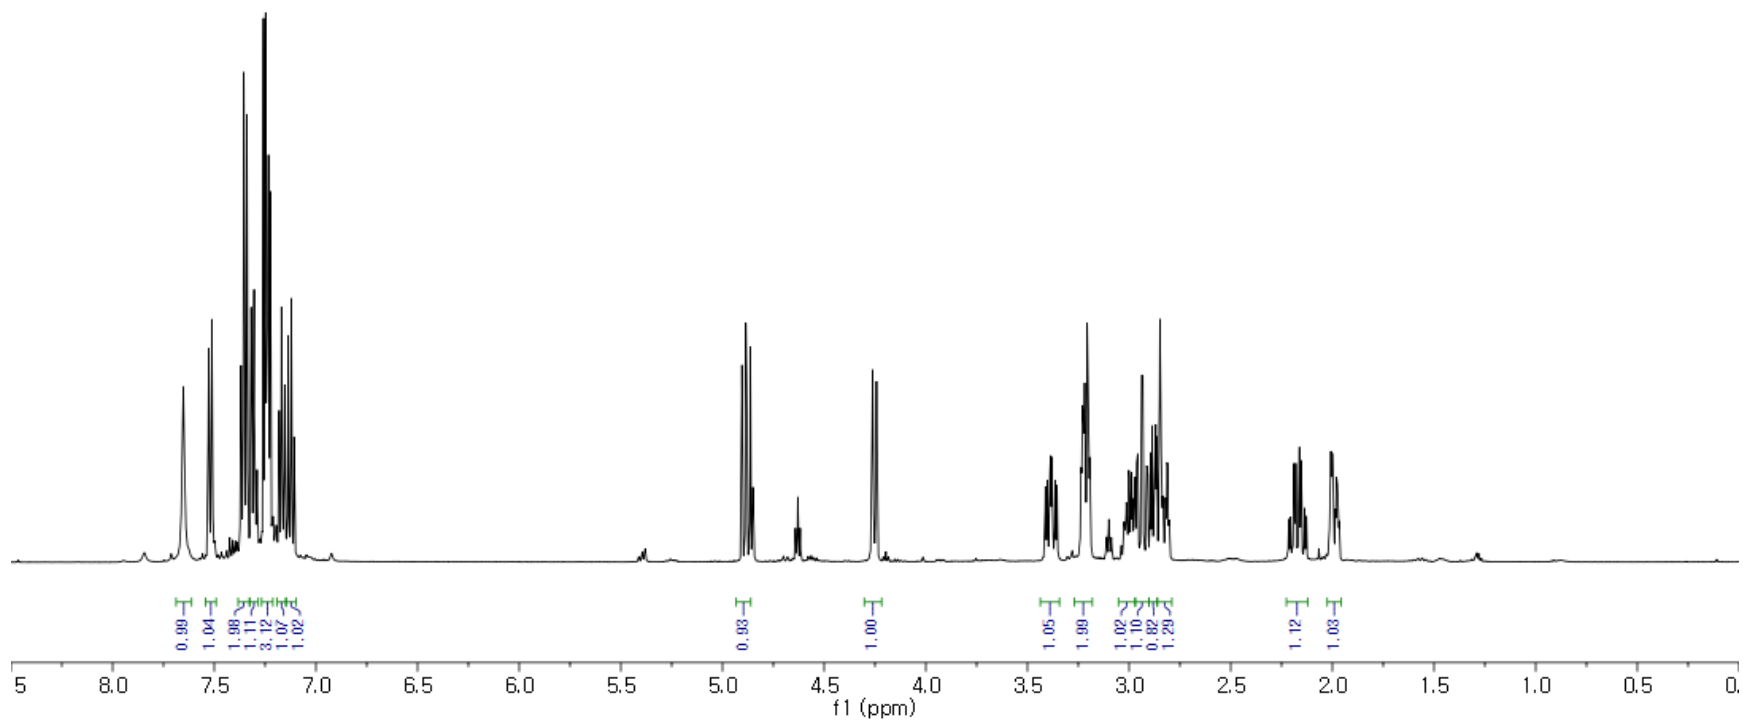

$^{13}\text{C}$  NMR of **6t** in  $\text{CDCl}_3$

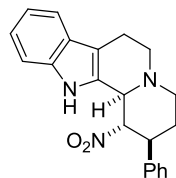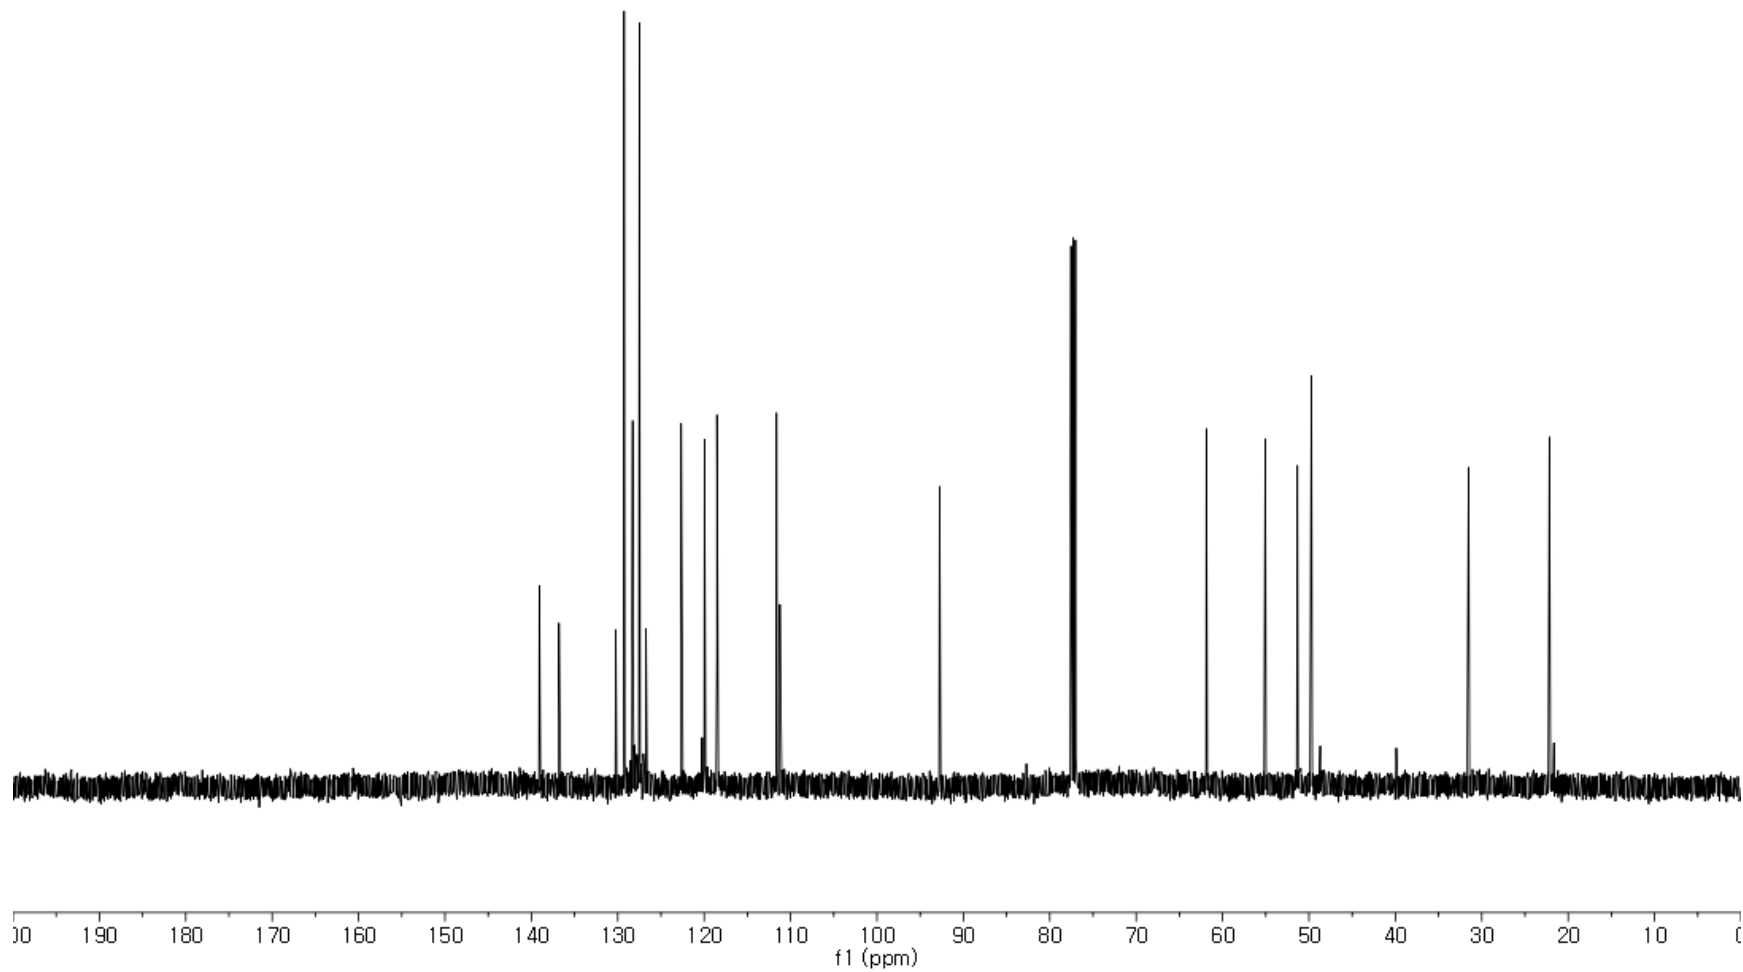

<sup>1</sup>H NMR of **8a** in CDCl<sub>3</sub>

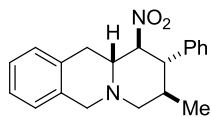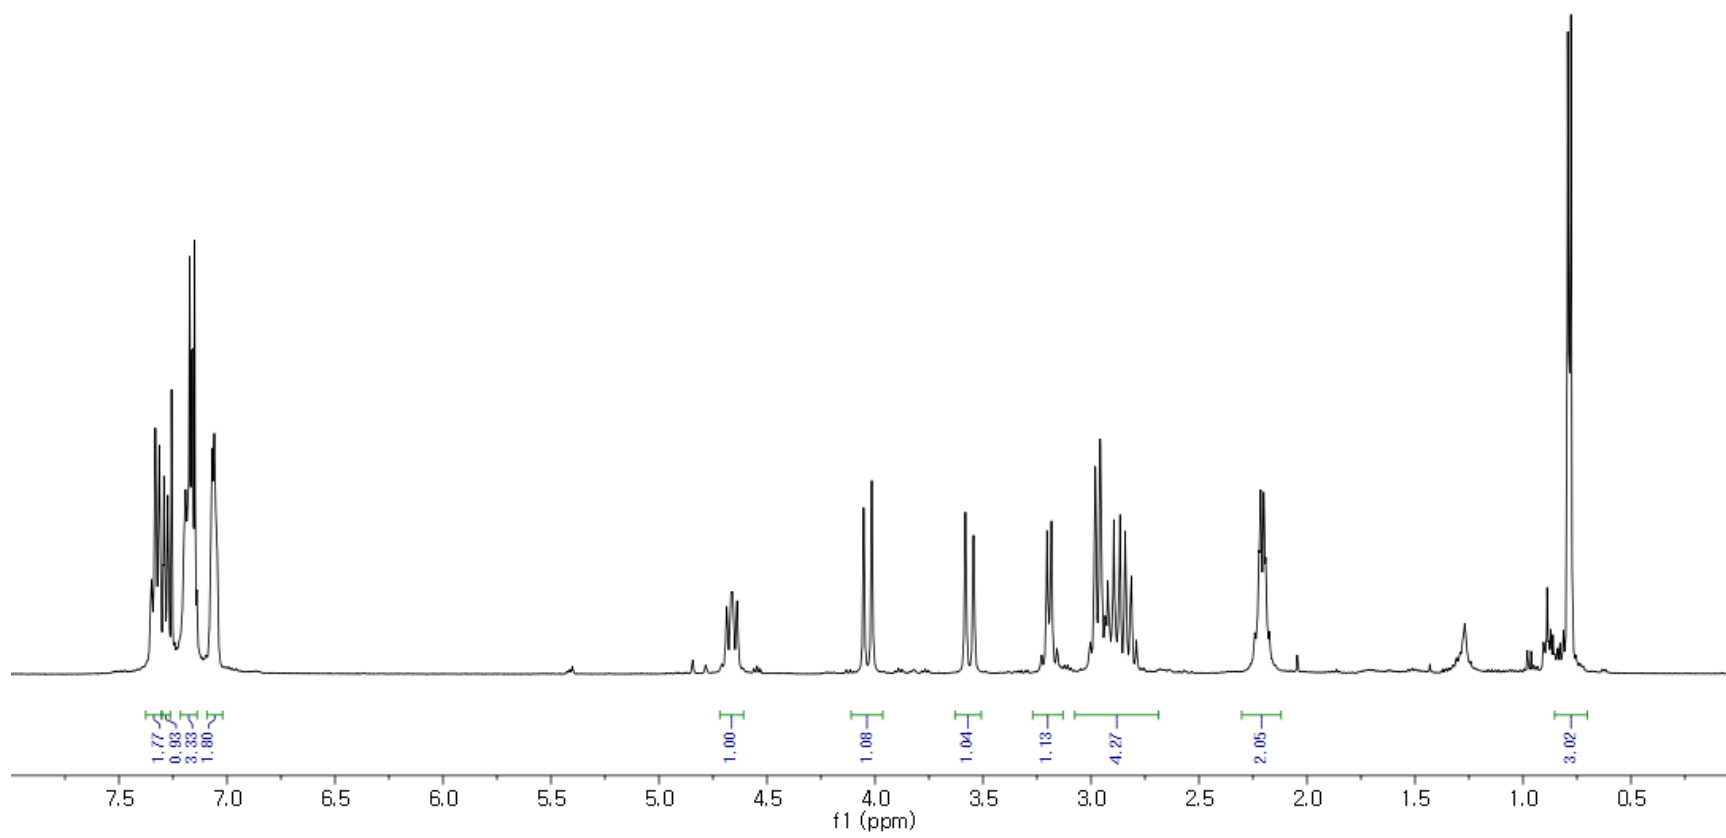



$^{13}\text{C}$  NMR of **8a** in  $\text{CDCl}_3$

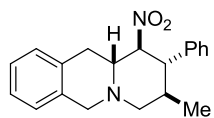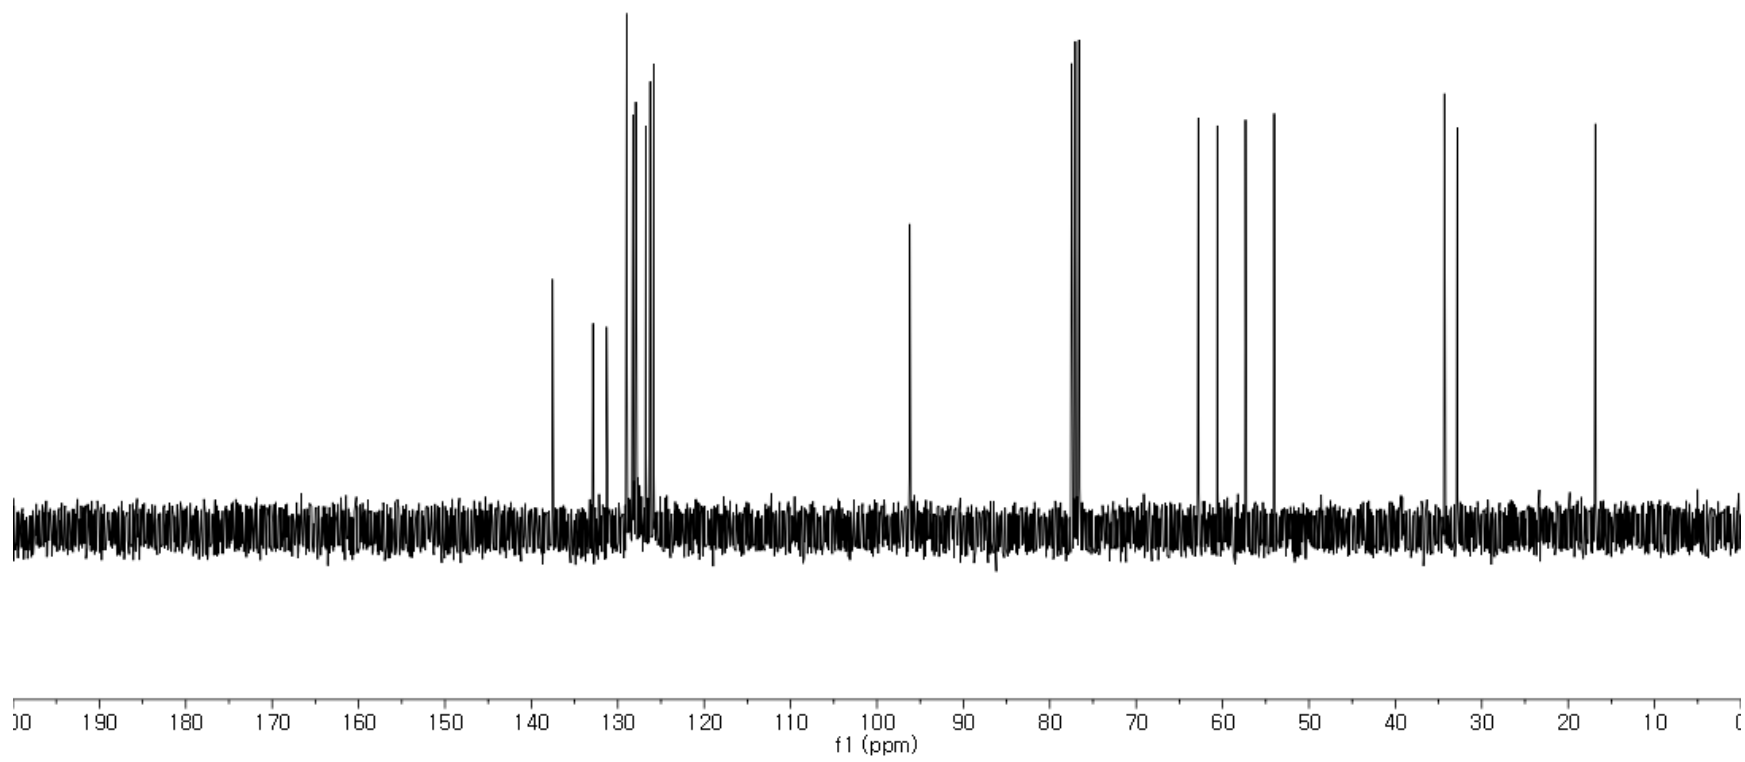

$^1\text{H}$  NMR of **9a** in  $\text{CDCl}_3$

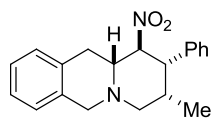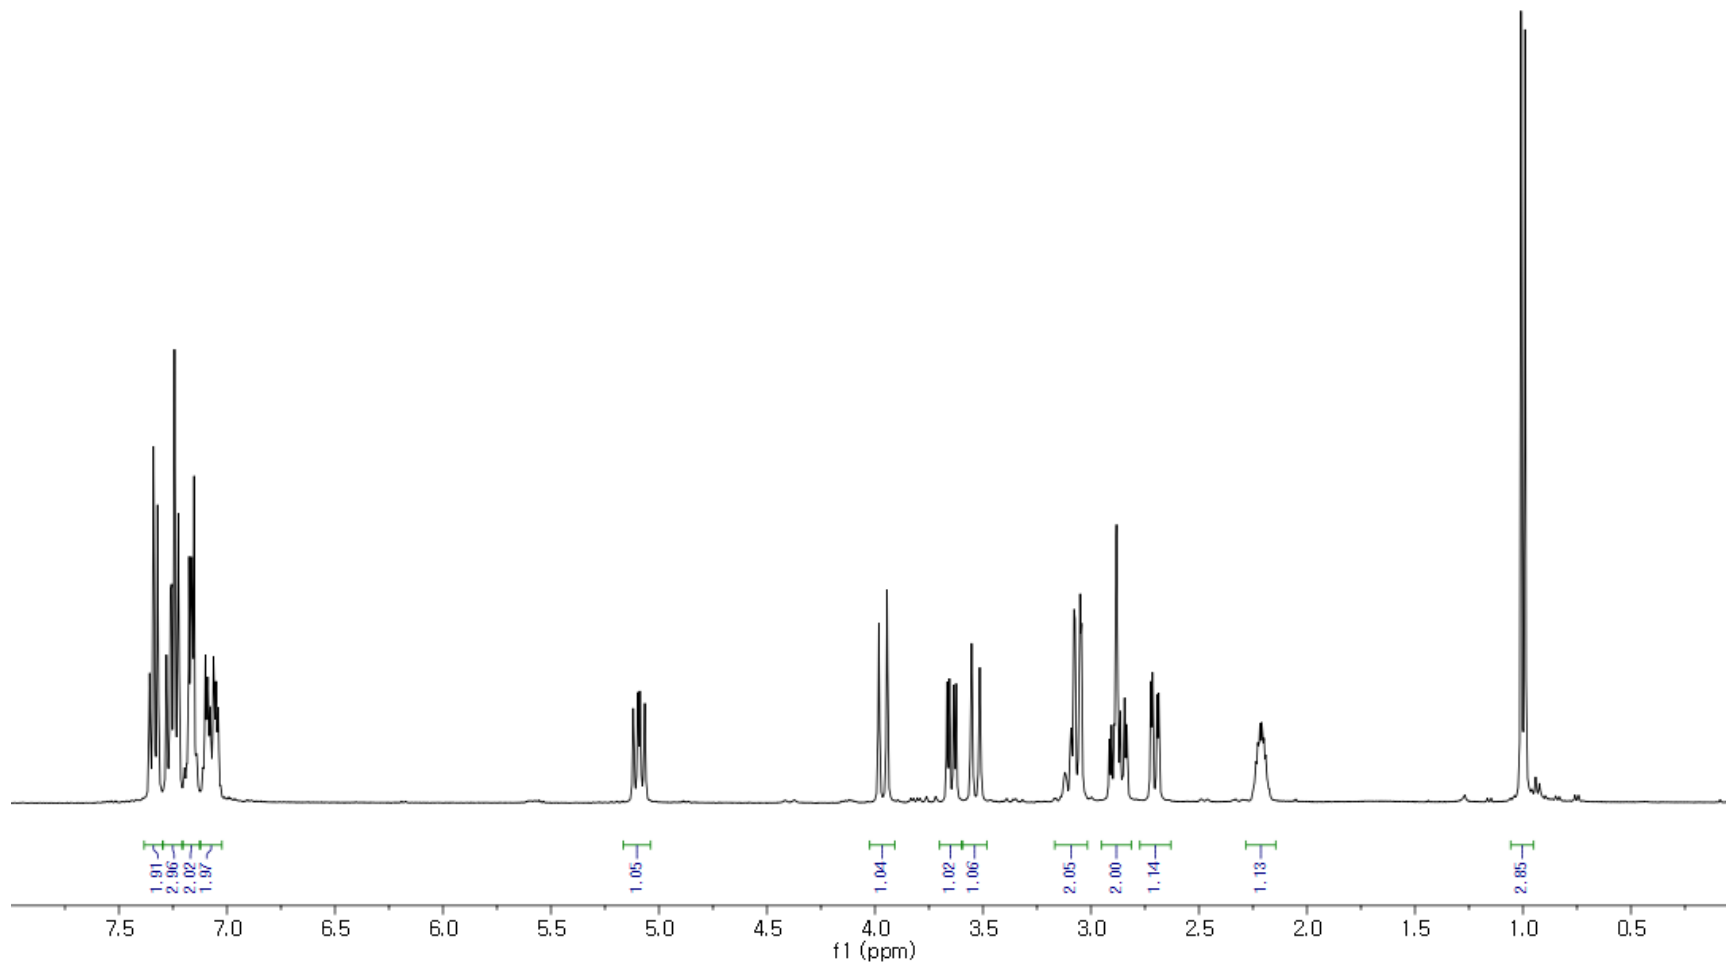

$^{13}\text{C}$  NMR of **9a** in  $\text{CDCl}_3$

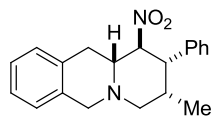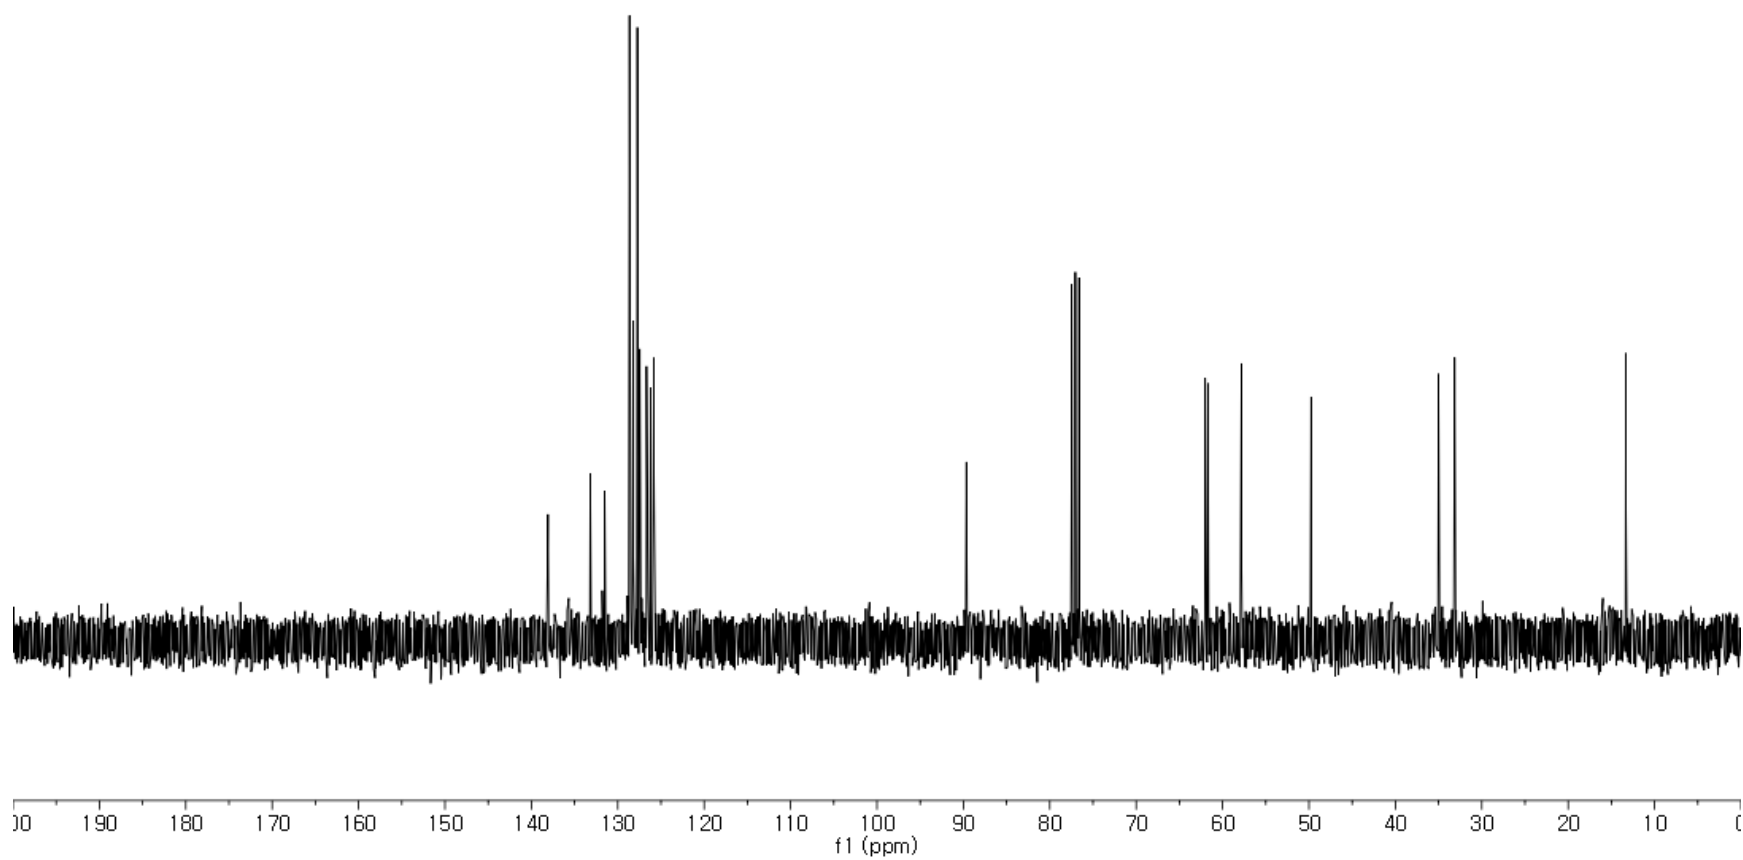

<sup>1</sup>H NMR of **8c** in CDCl<sub>3</sub>

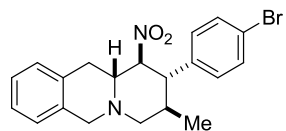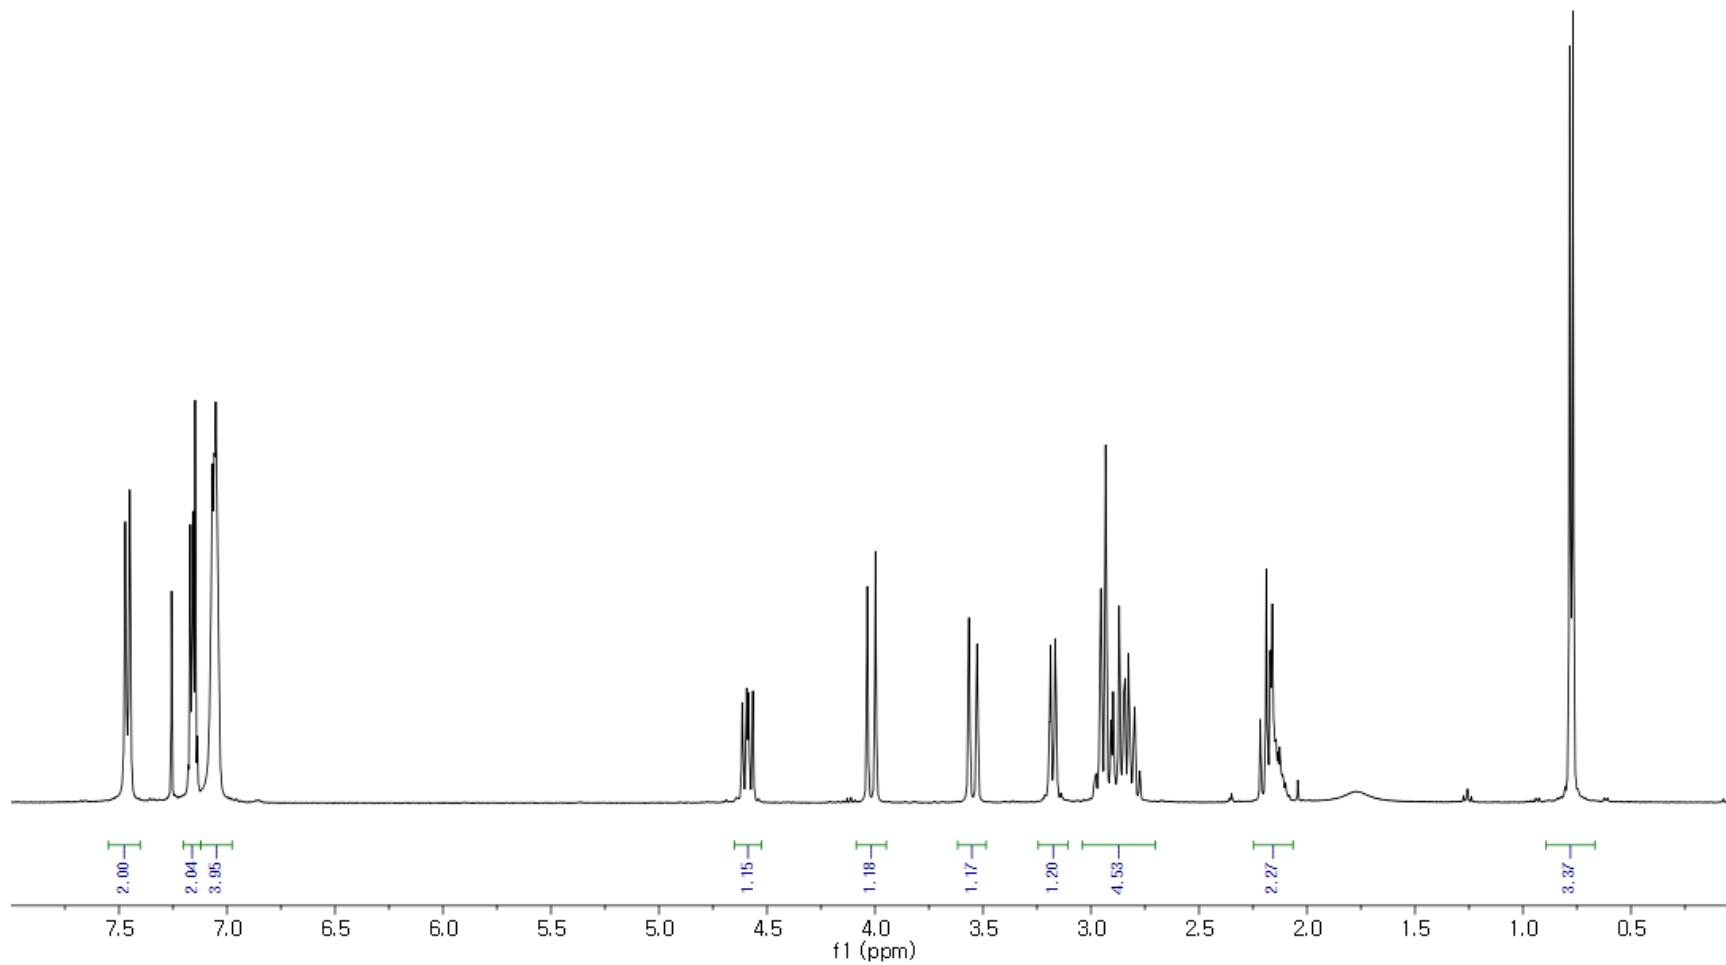

$^{13}\text{C}$  NMR of **8c** in  $\text{CDCl}_3$

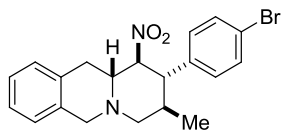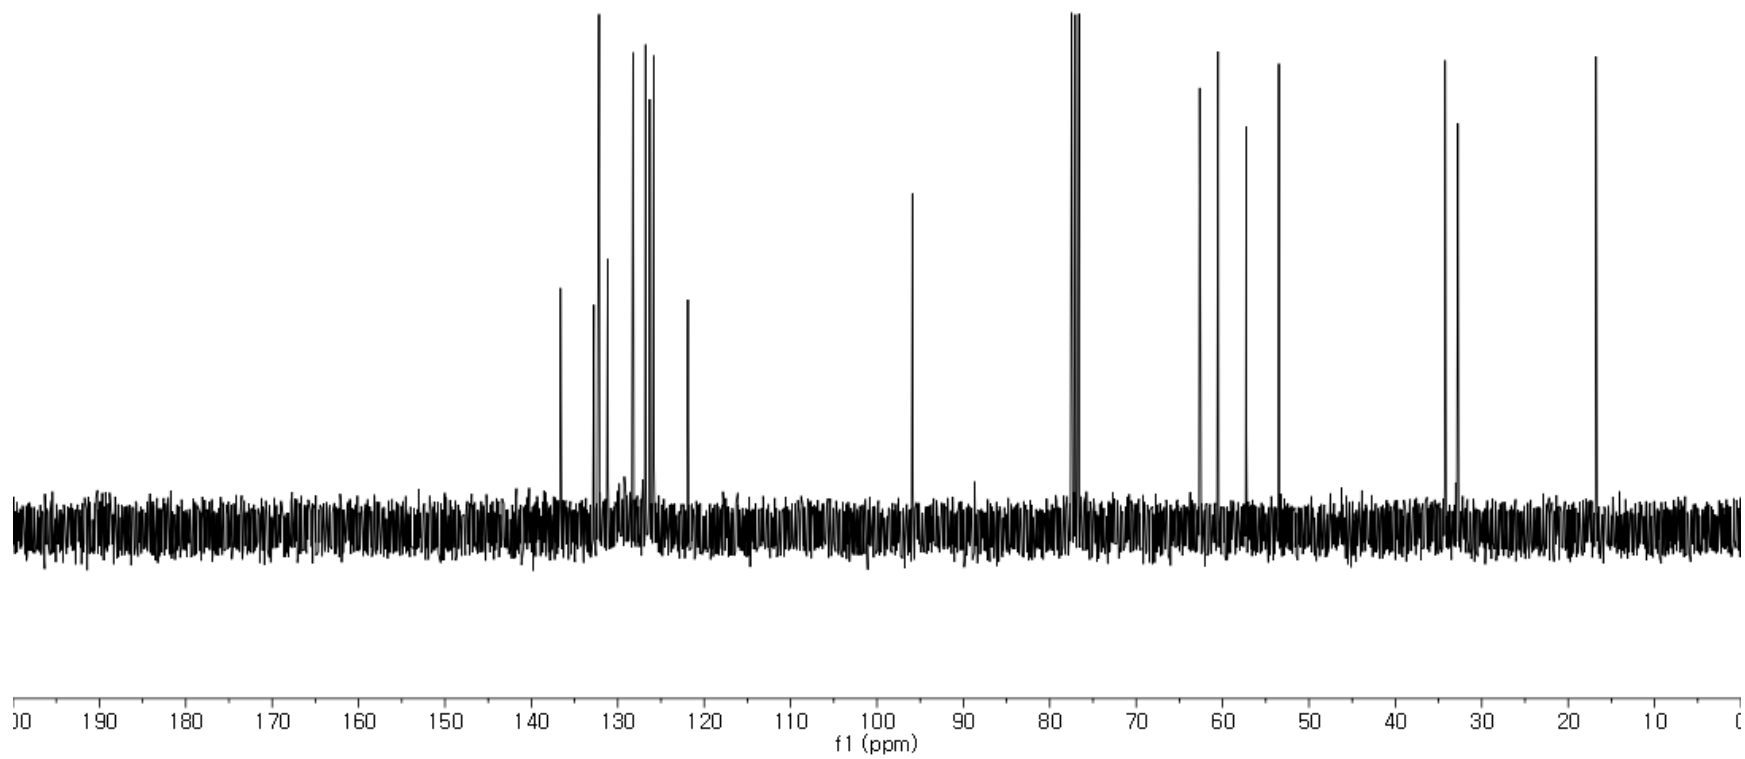

<sup>1</sup>H NMR of **9c** in CDCl<sub>3</sub>

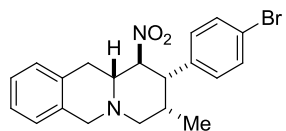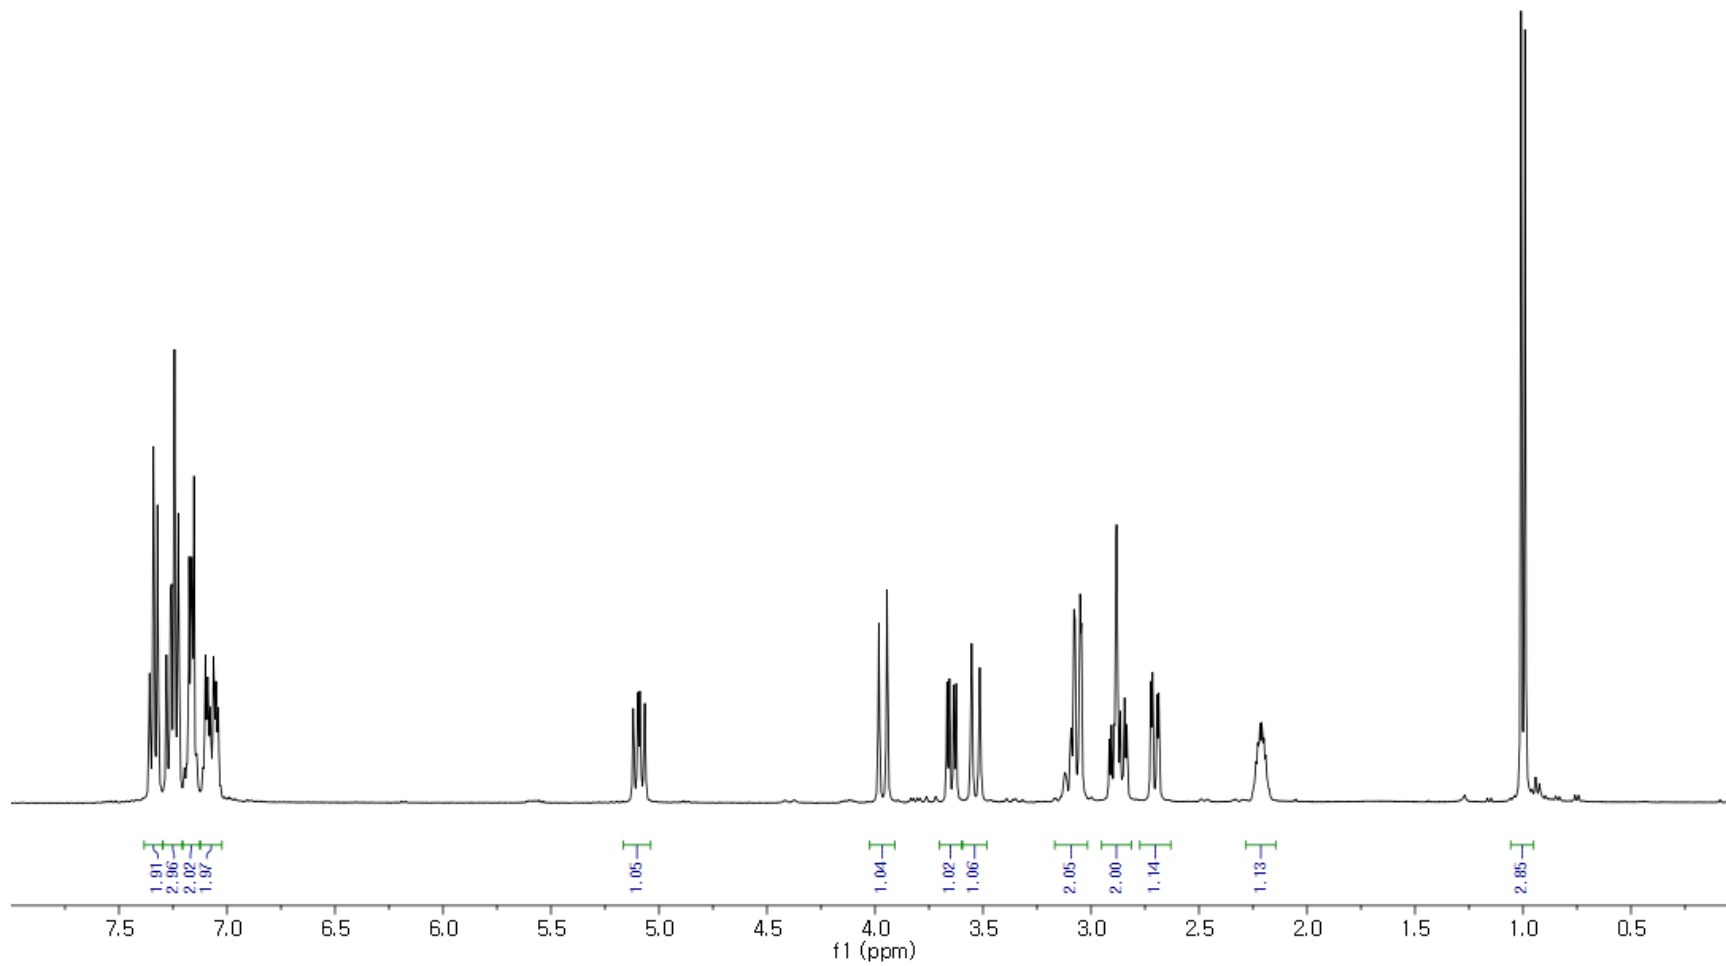

$^{13}\text{C}$  NMR of **9c** in  $\text{CDCl}_3$

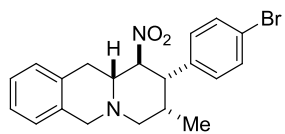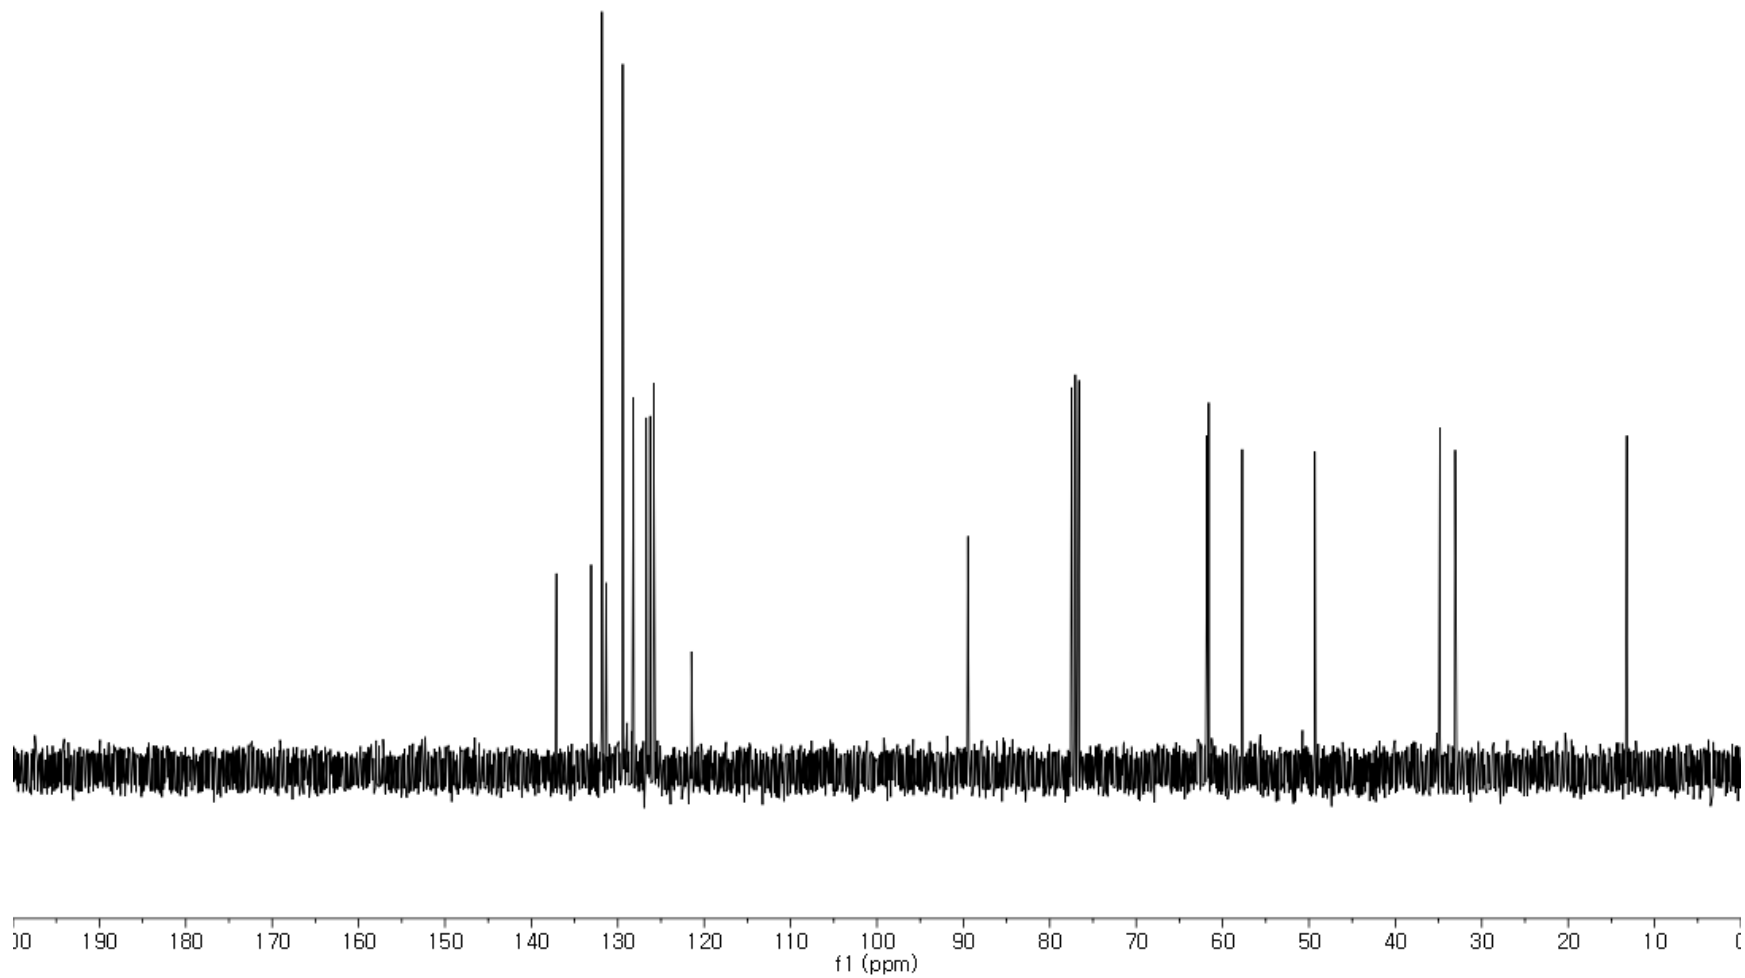

<sup>1</sup>H NMR of **8e** in CDCl<sub>3</sub>

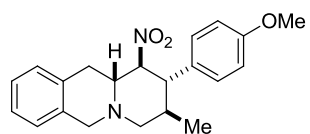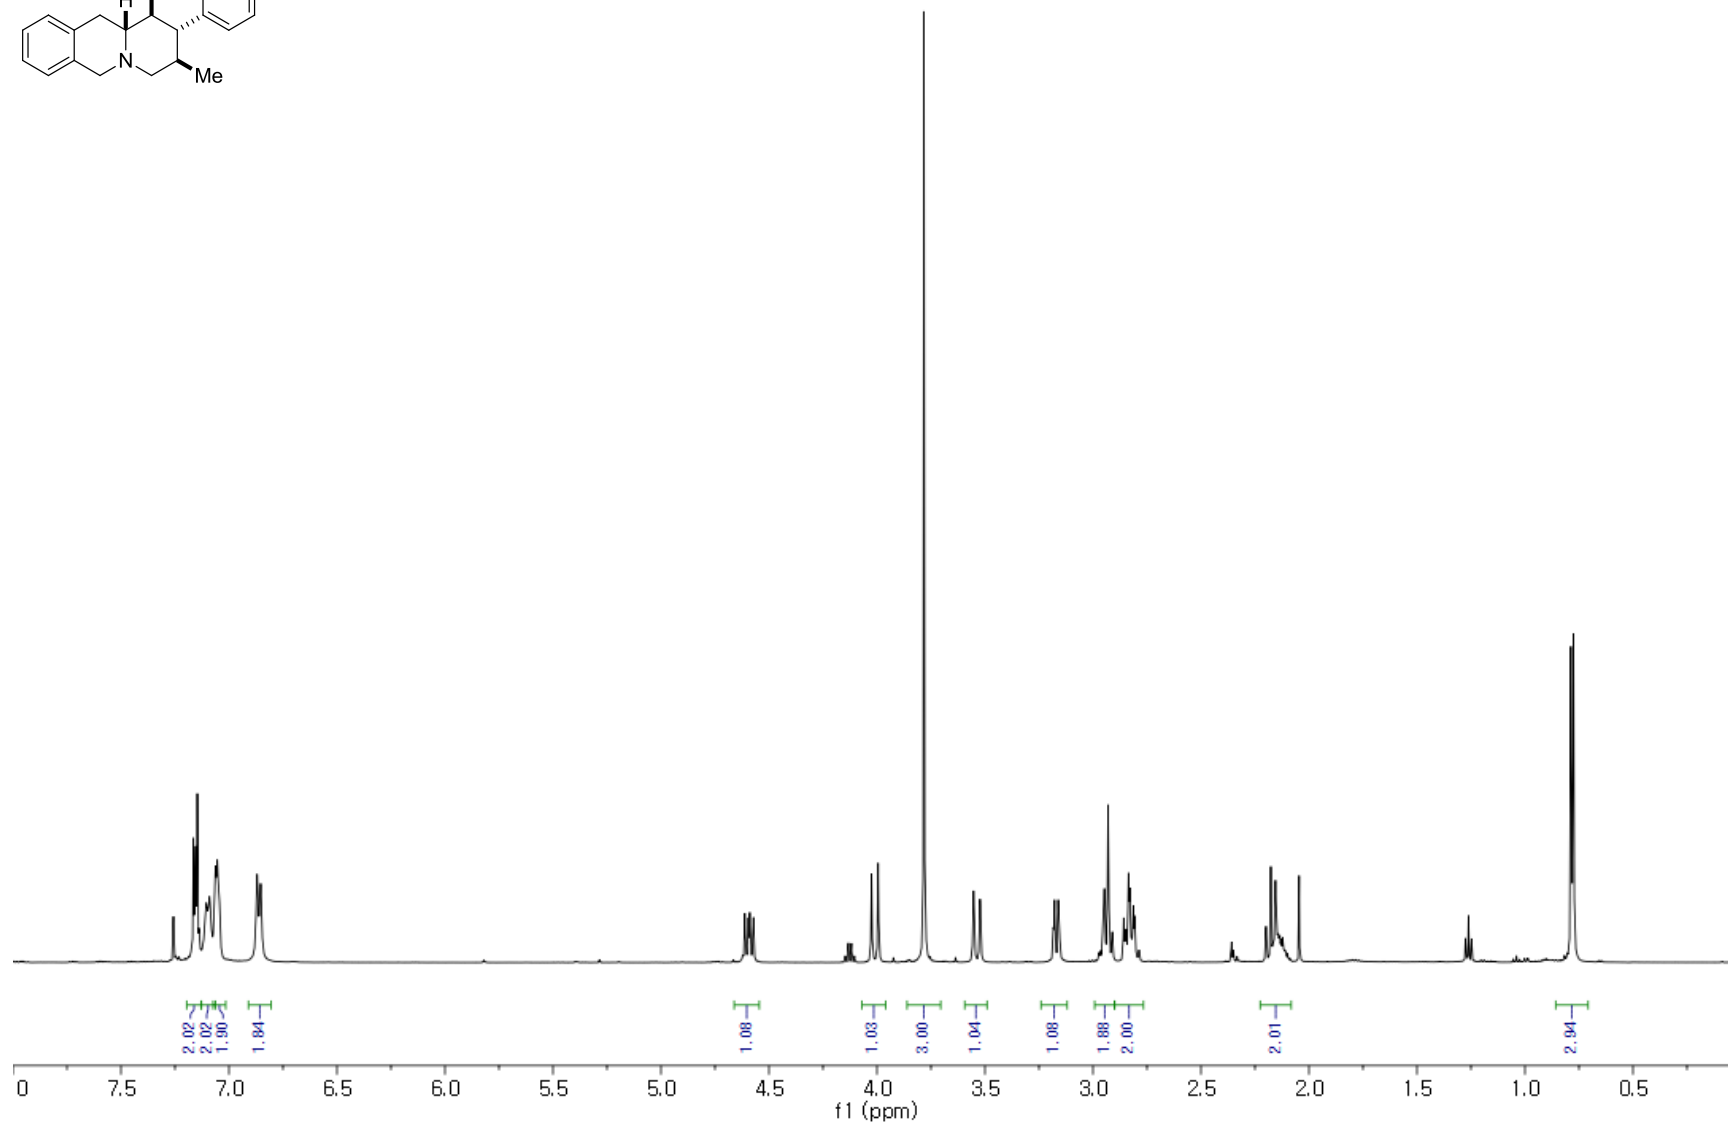



$^{13}\text{C}$  NMR of **8e** in  $\text{CDCl}_3$

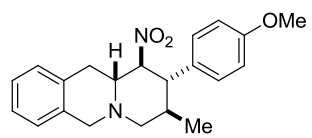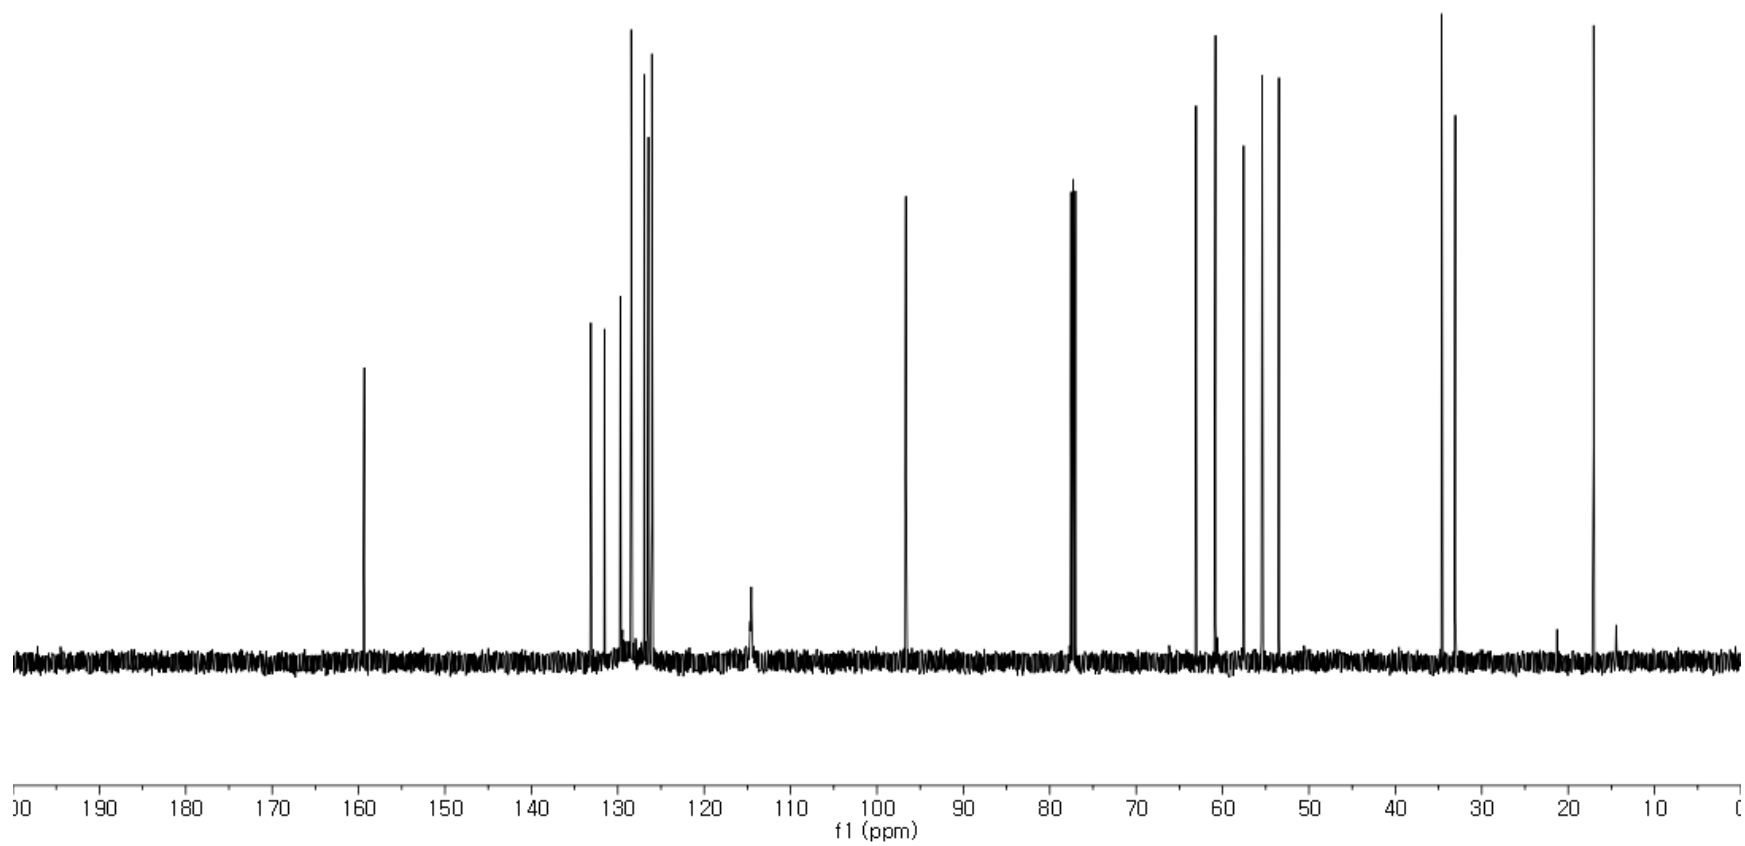

<sup>1</sup>H NMR of **9e** in CDCl<sub>3</sub>

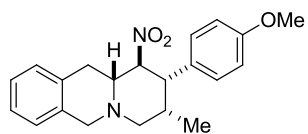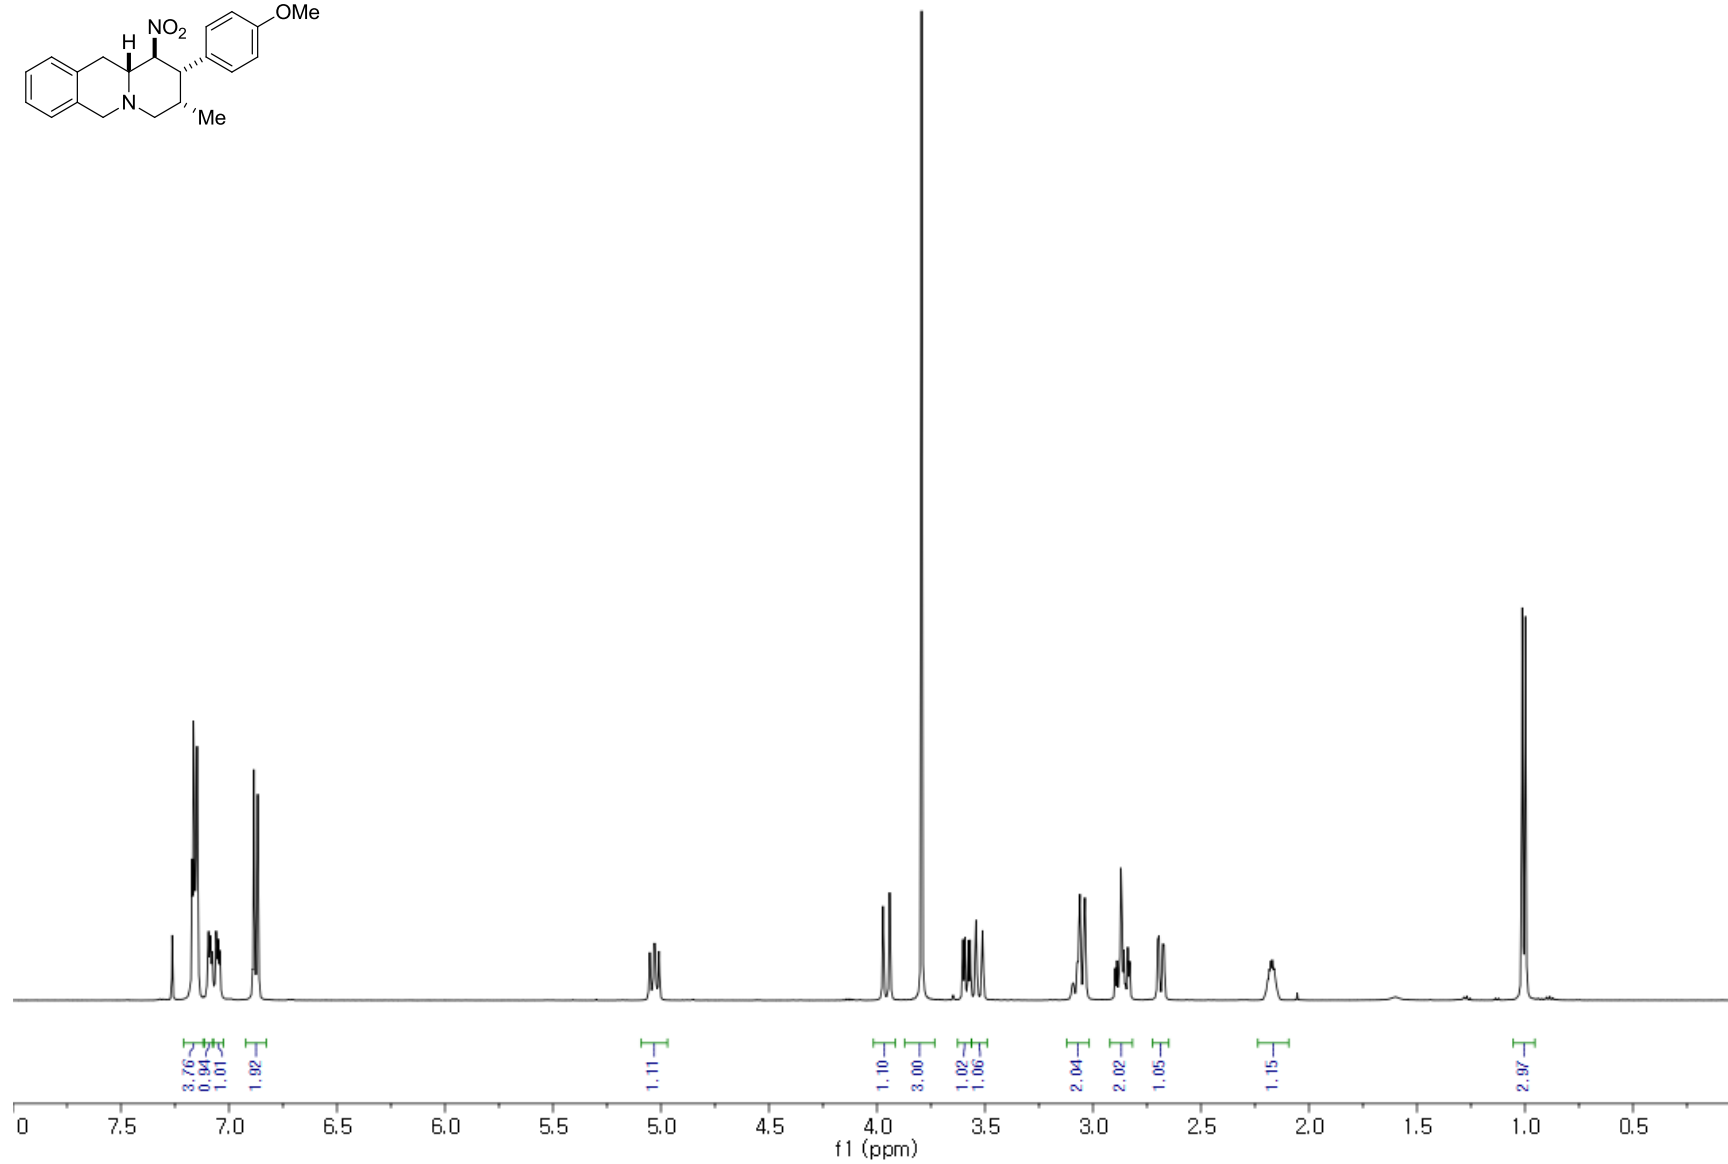

$^{13}\text{C}$  NMR of **9e** in  $\text{CDCl}_3$

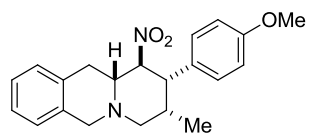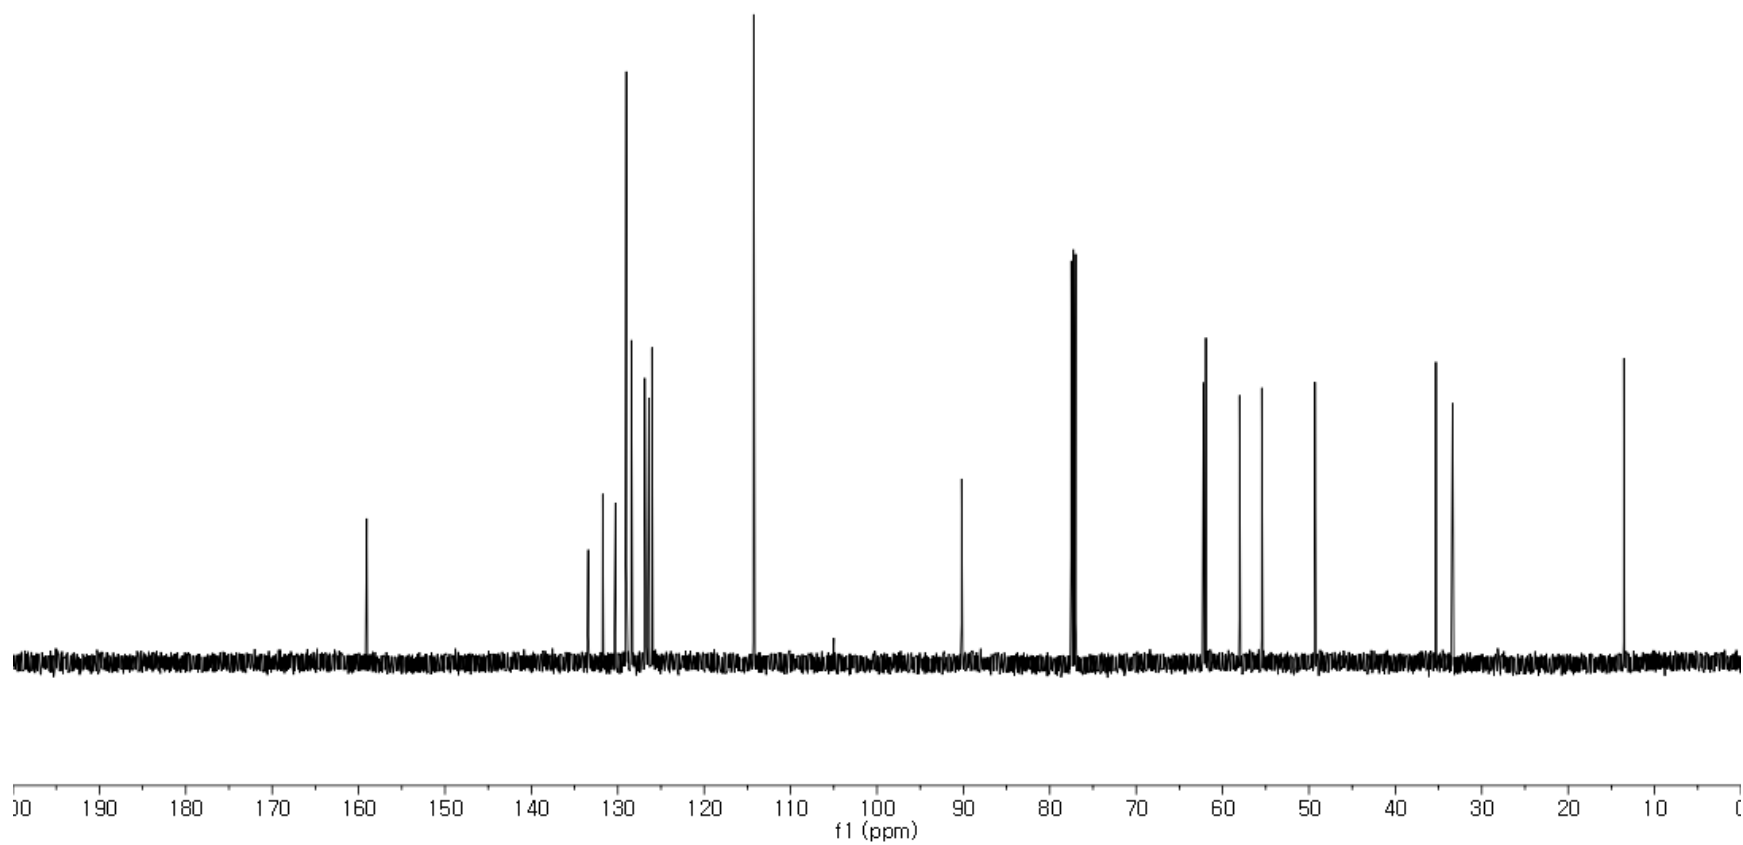

$^1\text{H}$  NMR of **8k** in  $\text{CDCl}_3$

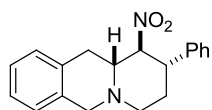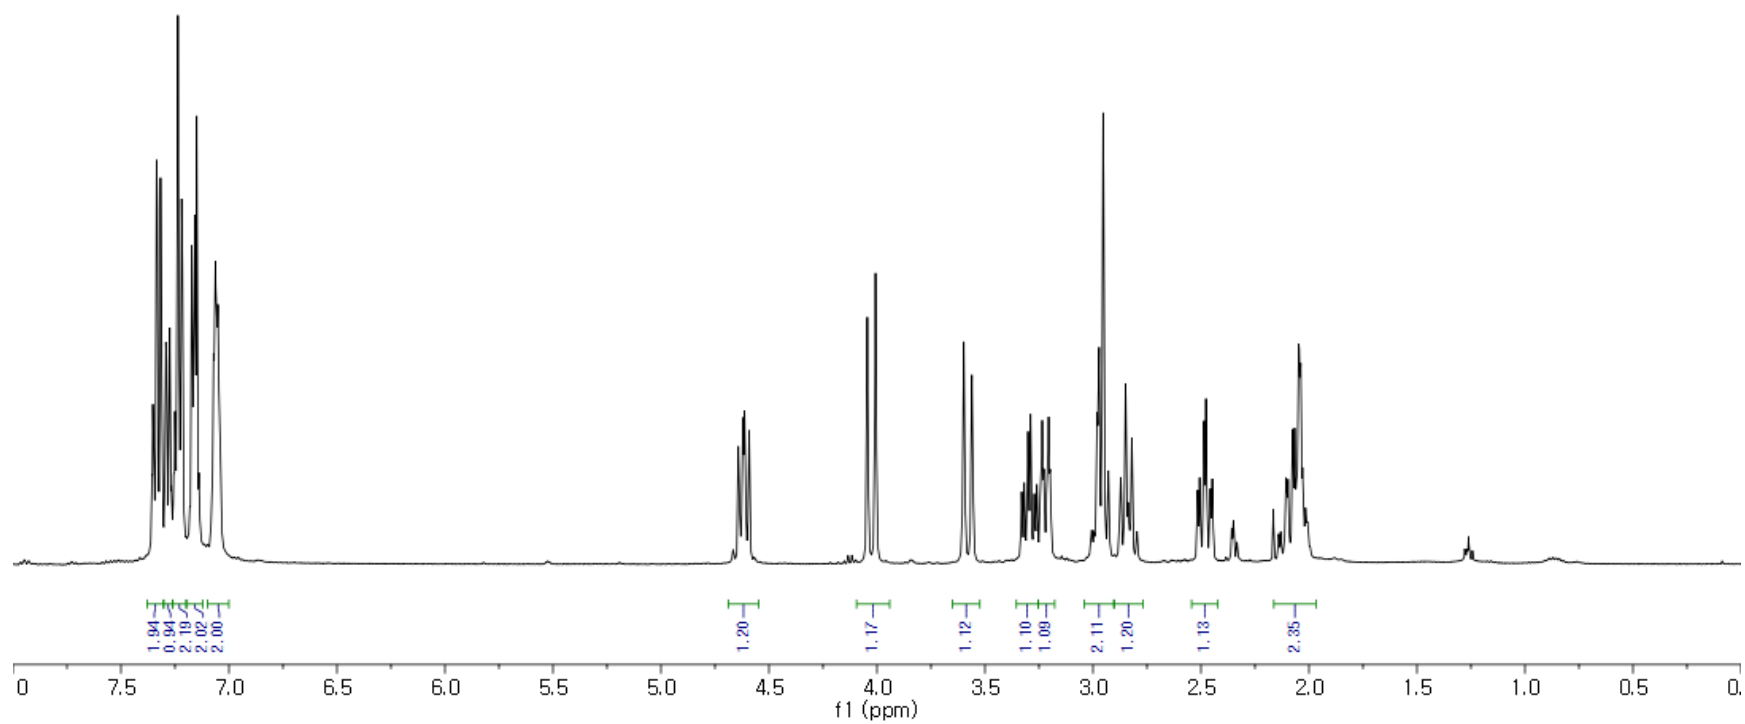

$^{13}\text{C}$  NMR of **8k** in  $\text{CDCl}_3$

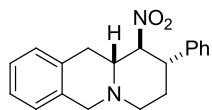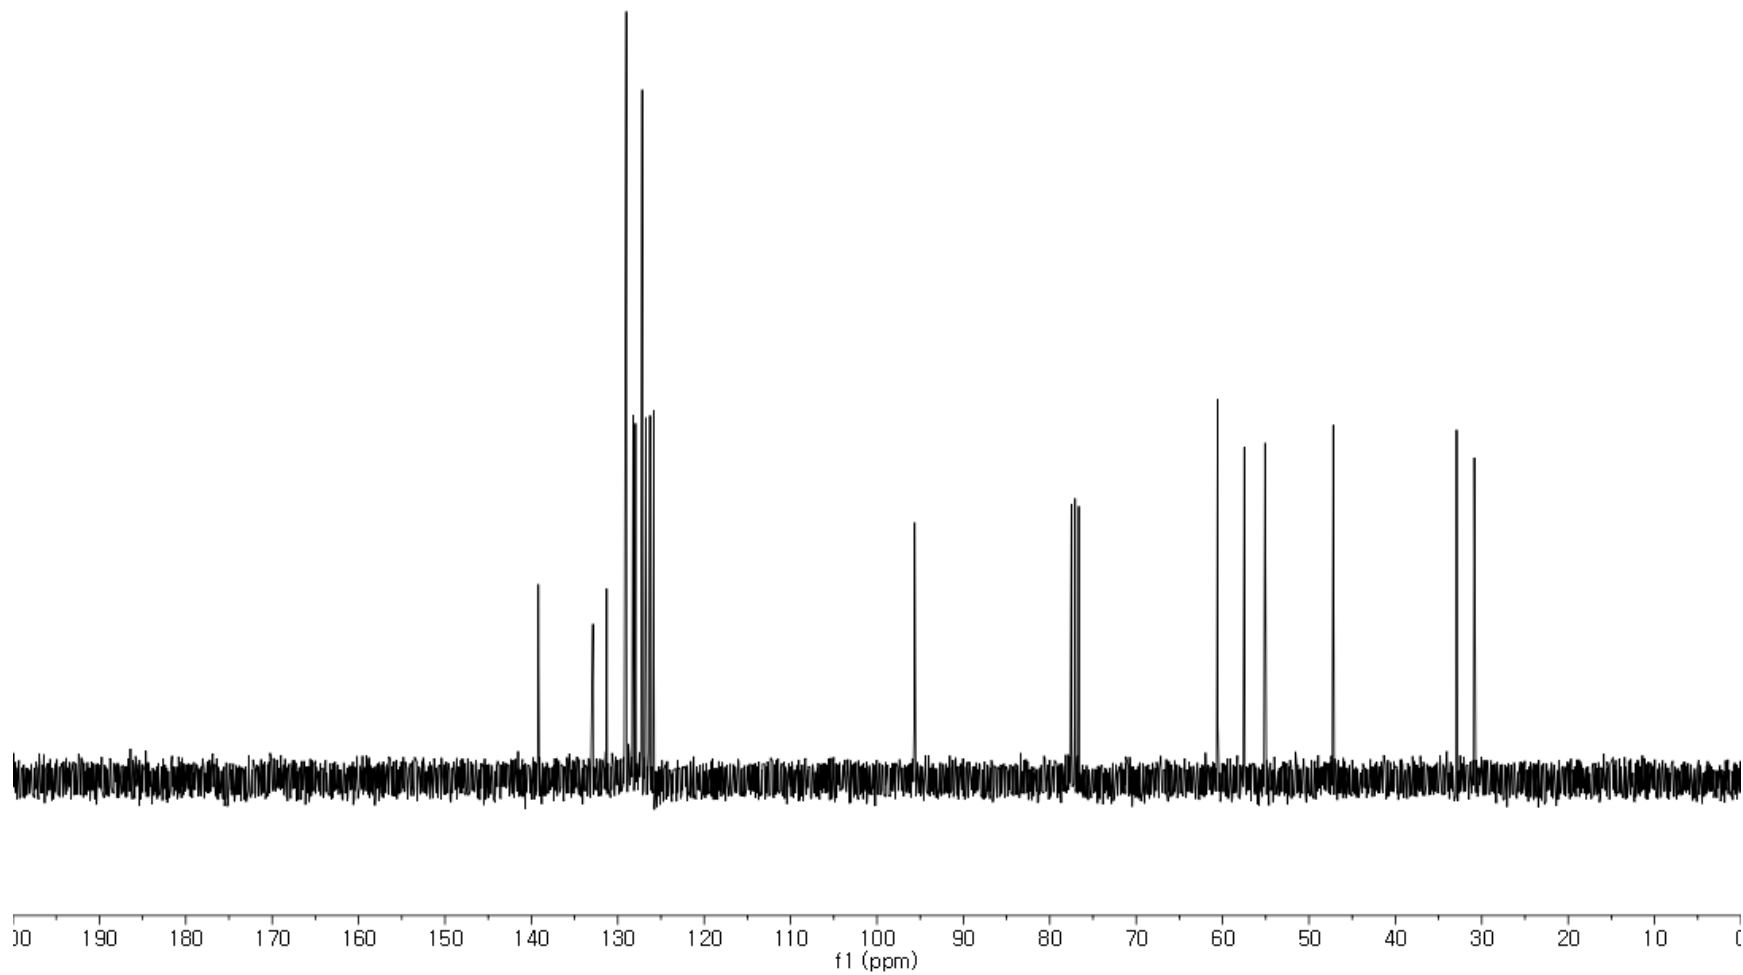

$^1\text{H}$  NMR of **8l** in  $\text{CDCl}_3$

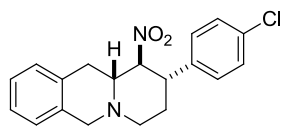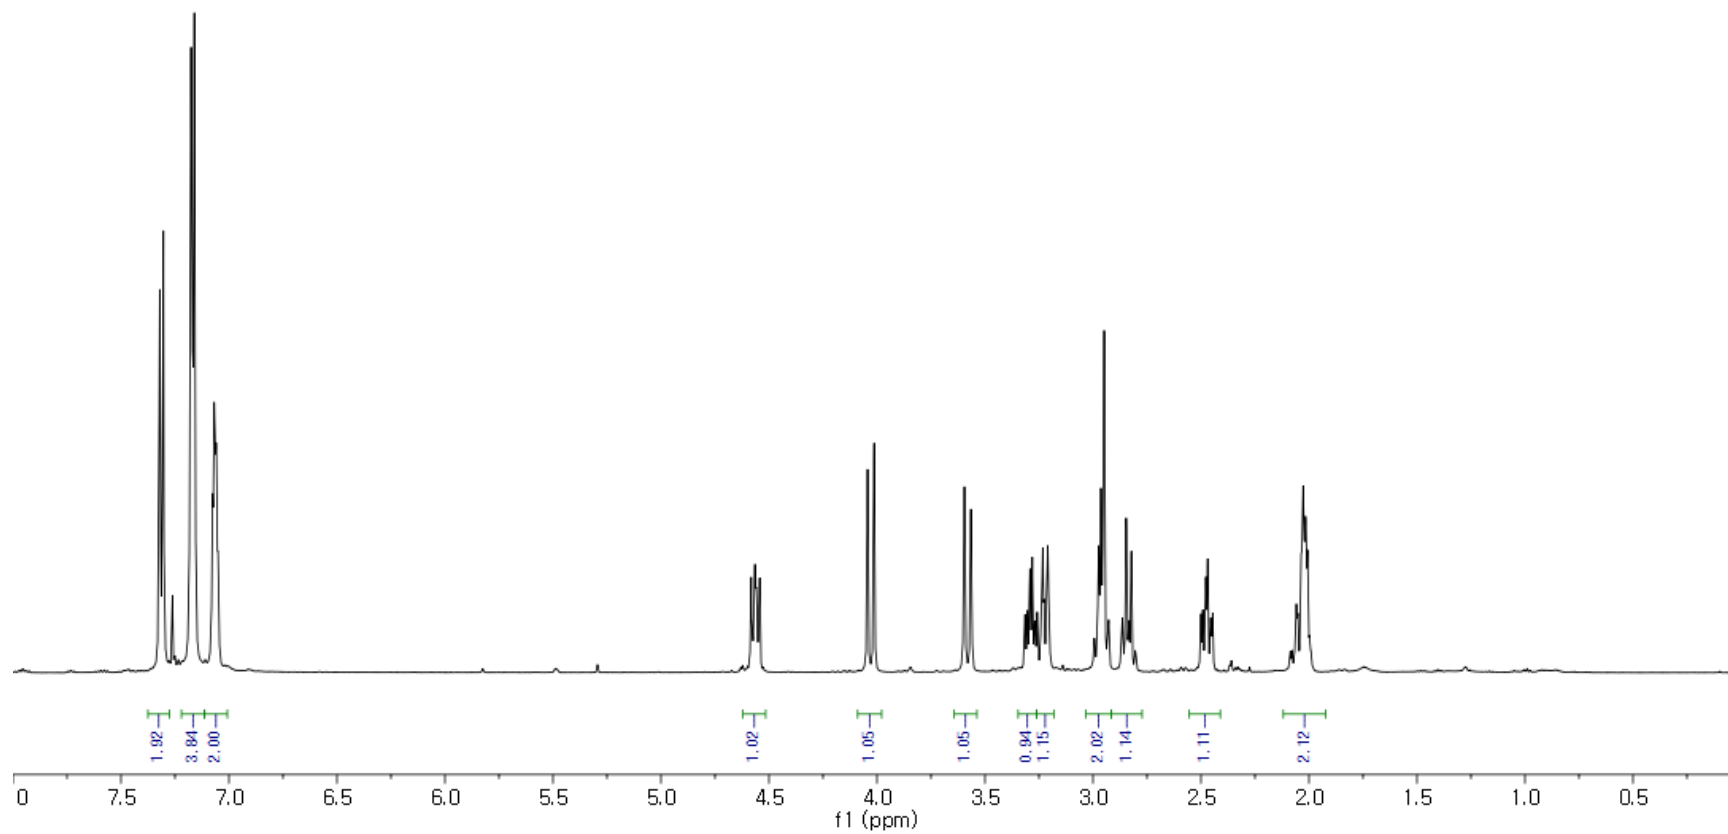

<sup>13</sup>C NMR of **8I** in CDCl<sub>3</sub>

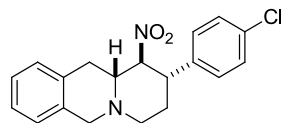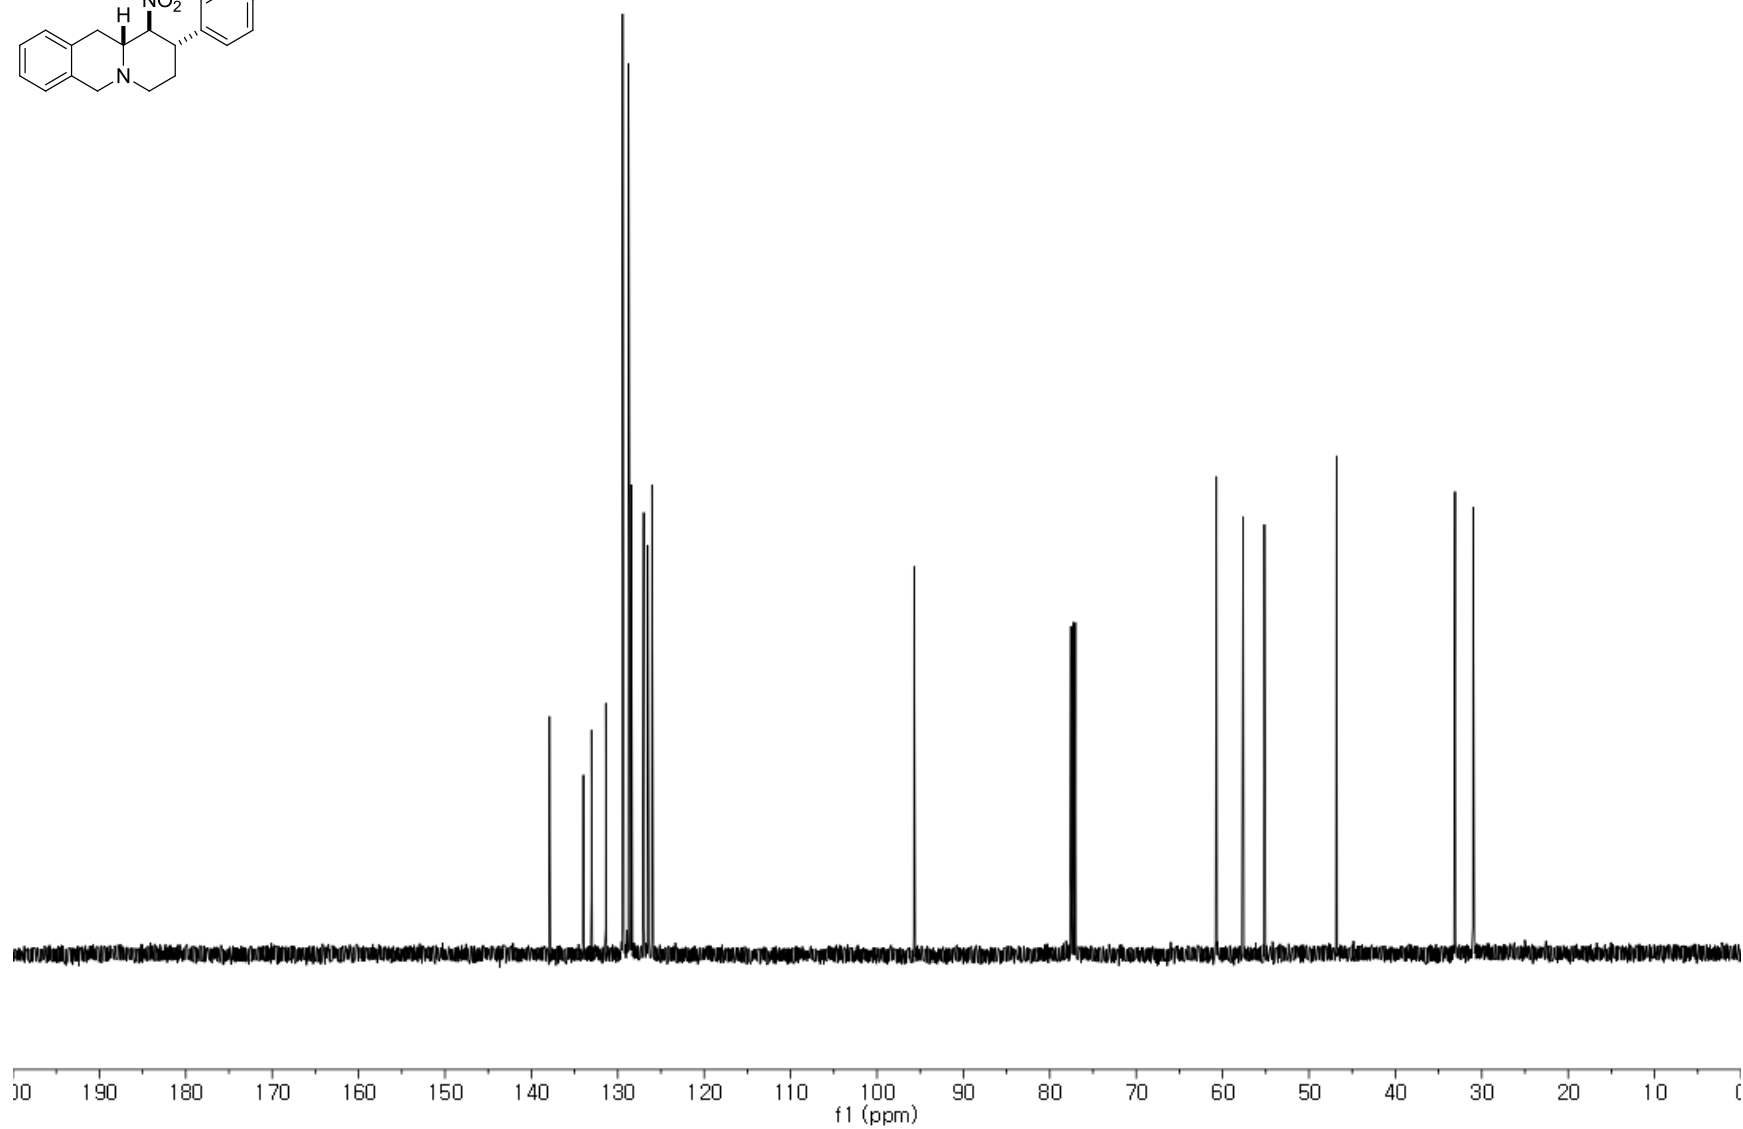

$^1\text{H}$  NMR of **8n** in  $\text{CDCl}_3$

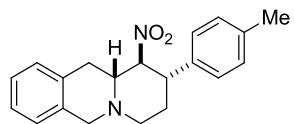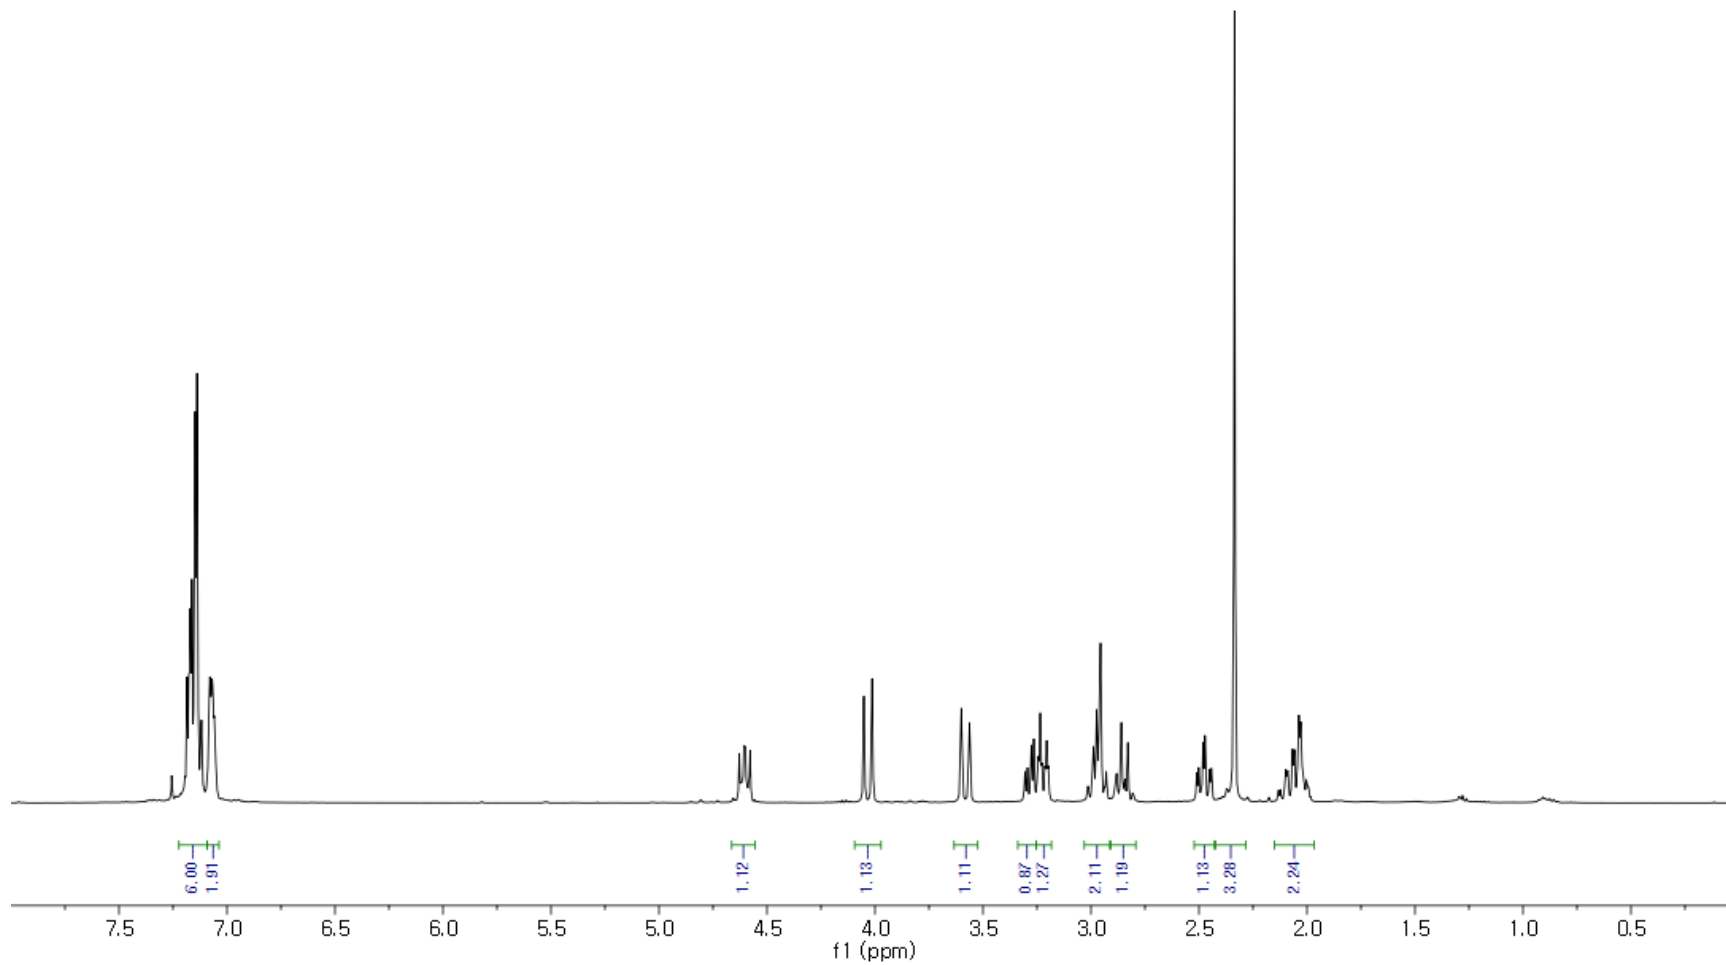



$^{13}\text{C}$  NMR of **8n** in  $\text{CDCl}_3$

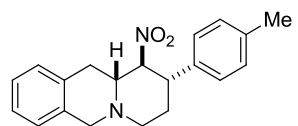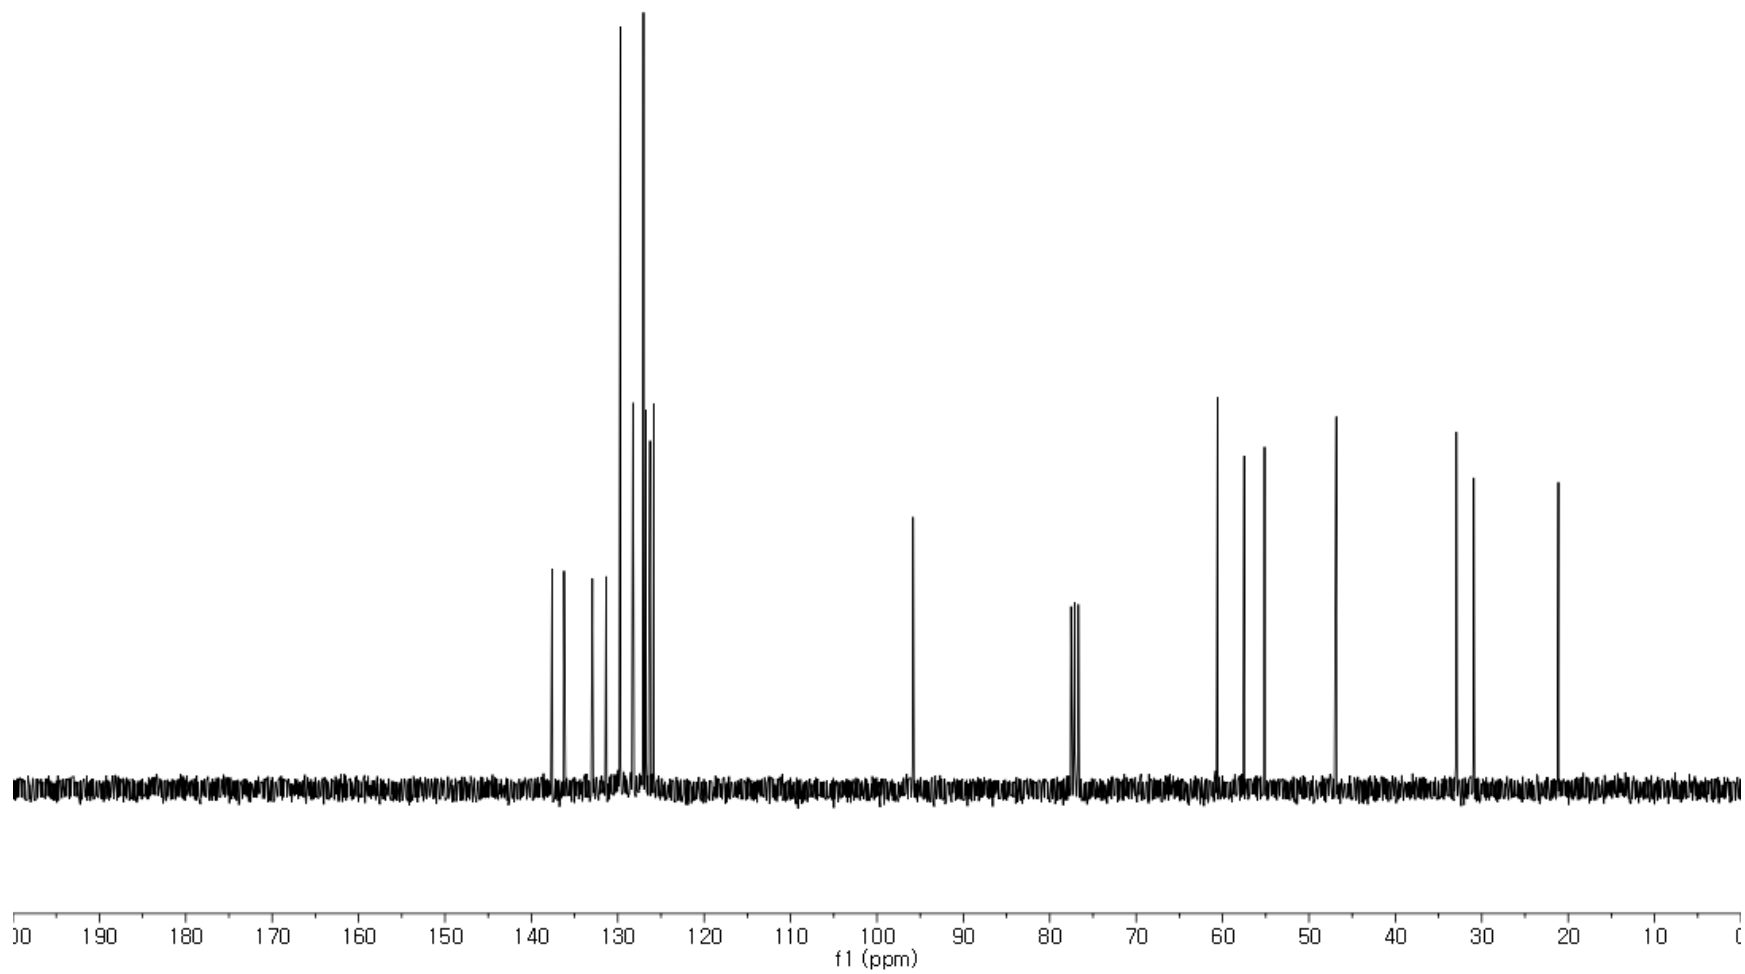

$^1\text{H}$  NMR of **11** in  $\text{CDCl}_3$

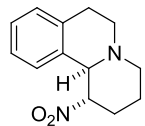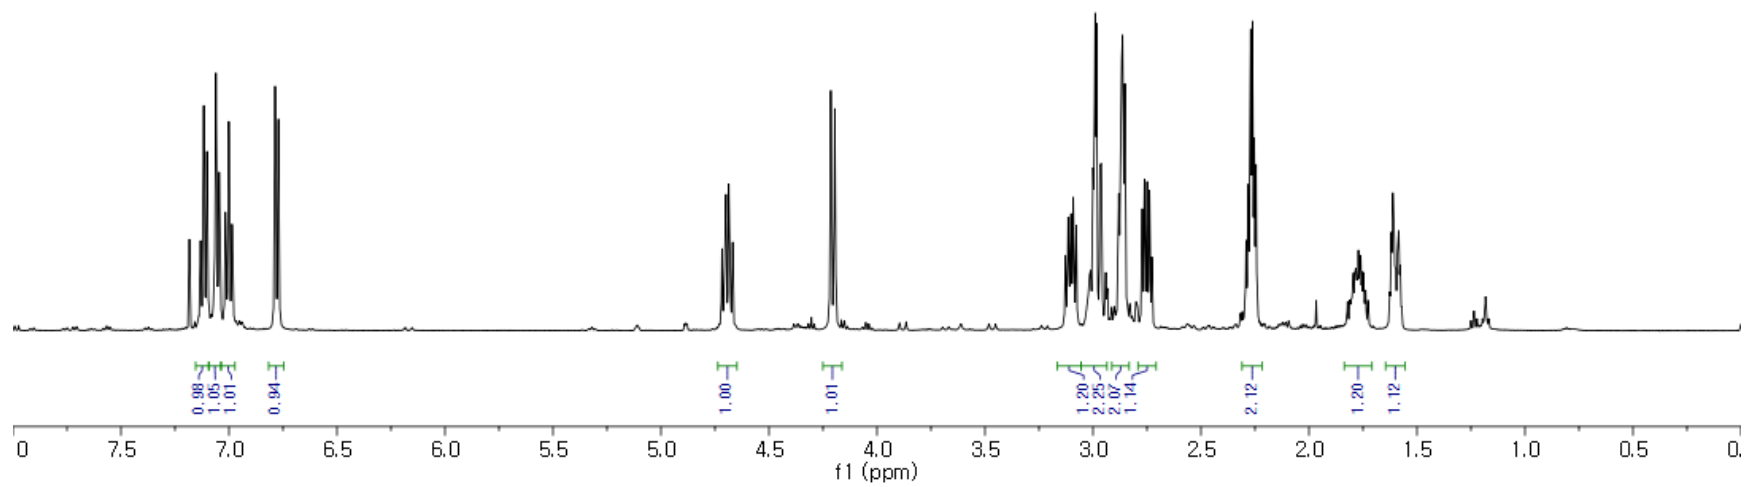

$^{13}\text{C}$  NMR of **11** in  $\text{CDCl}_3$

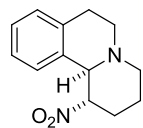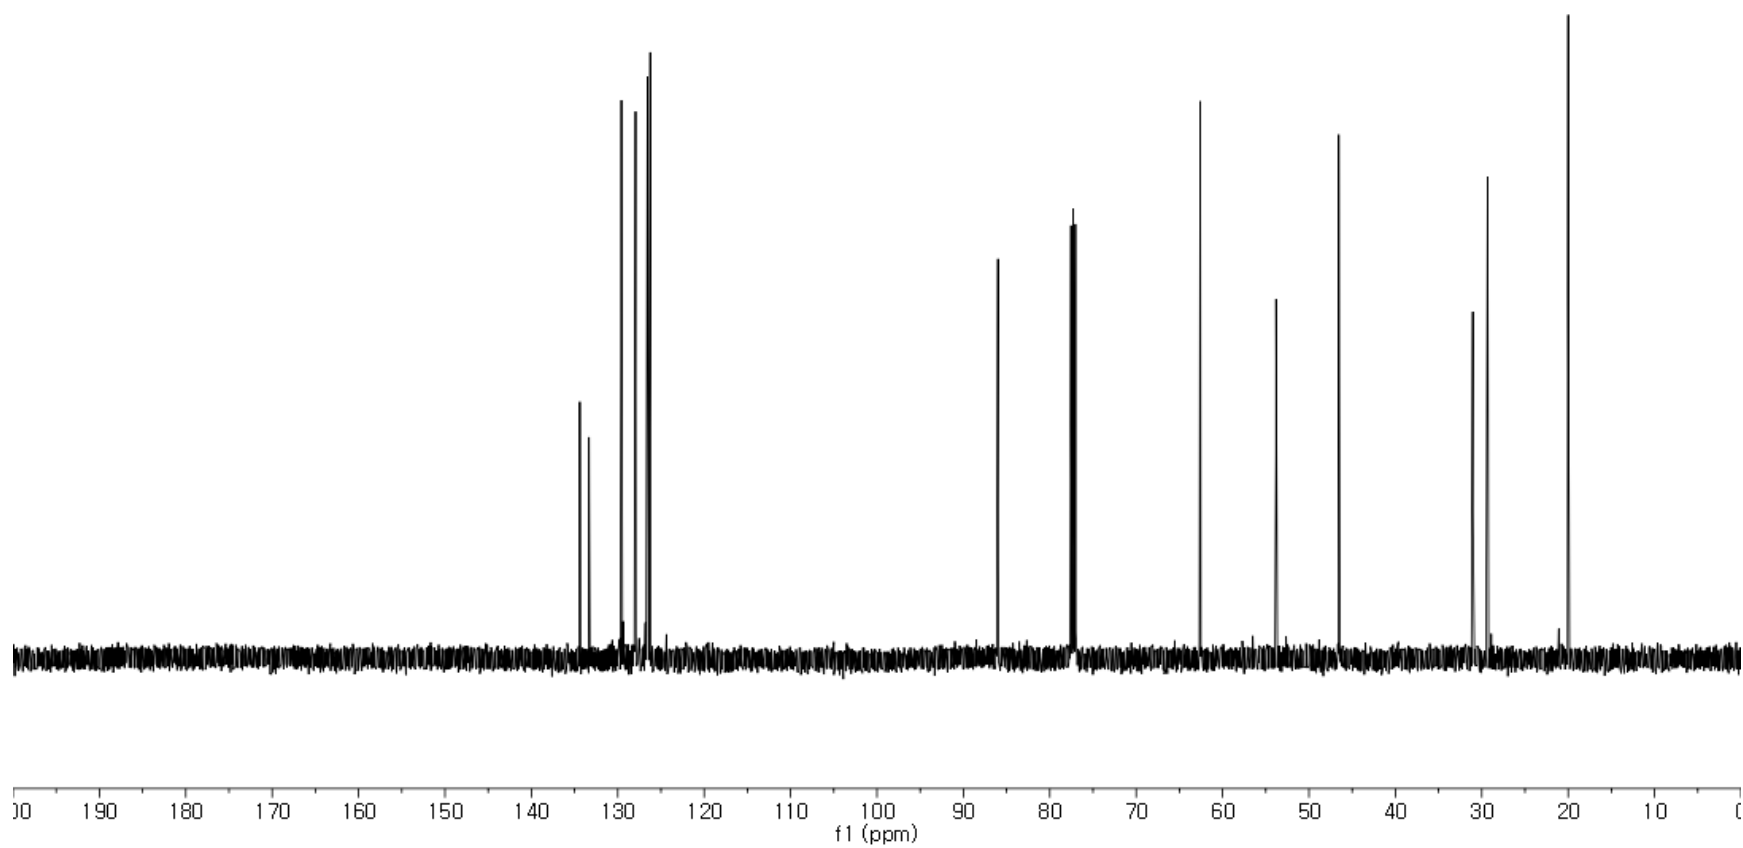

$^1\text{H}$  NMR of **12** in  $\text{CDCl}_3$

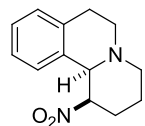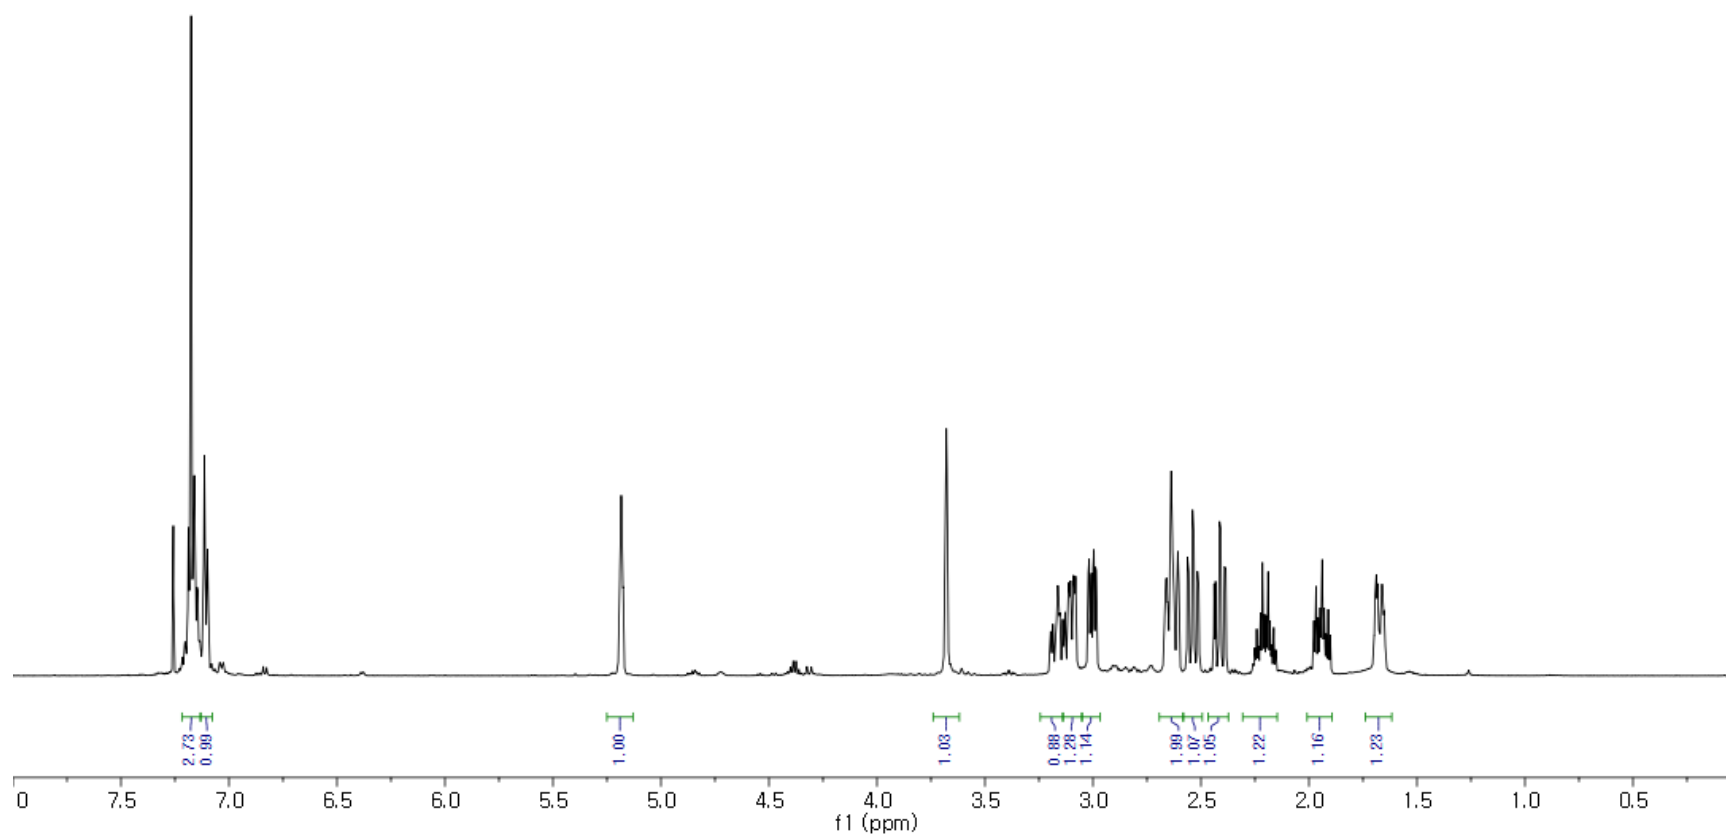

$^{13}\text{C}$  NMR of **12** in  $\text{CDCl}_3$

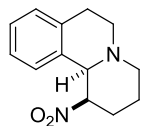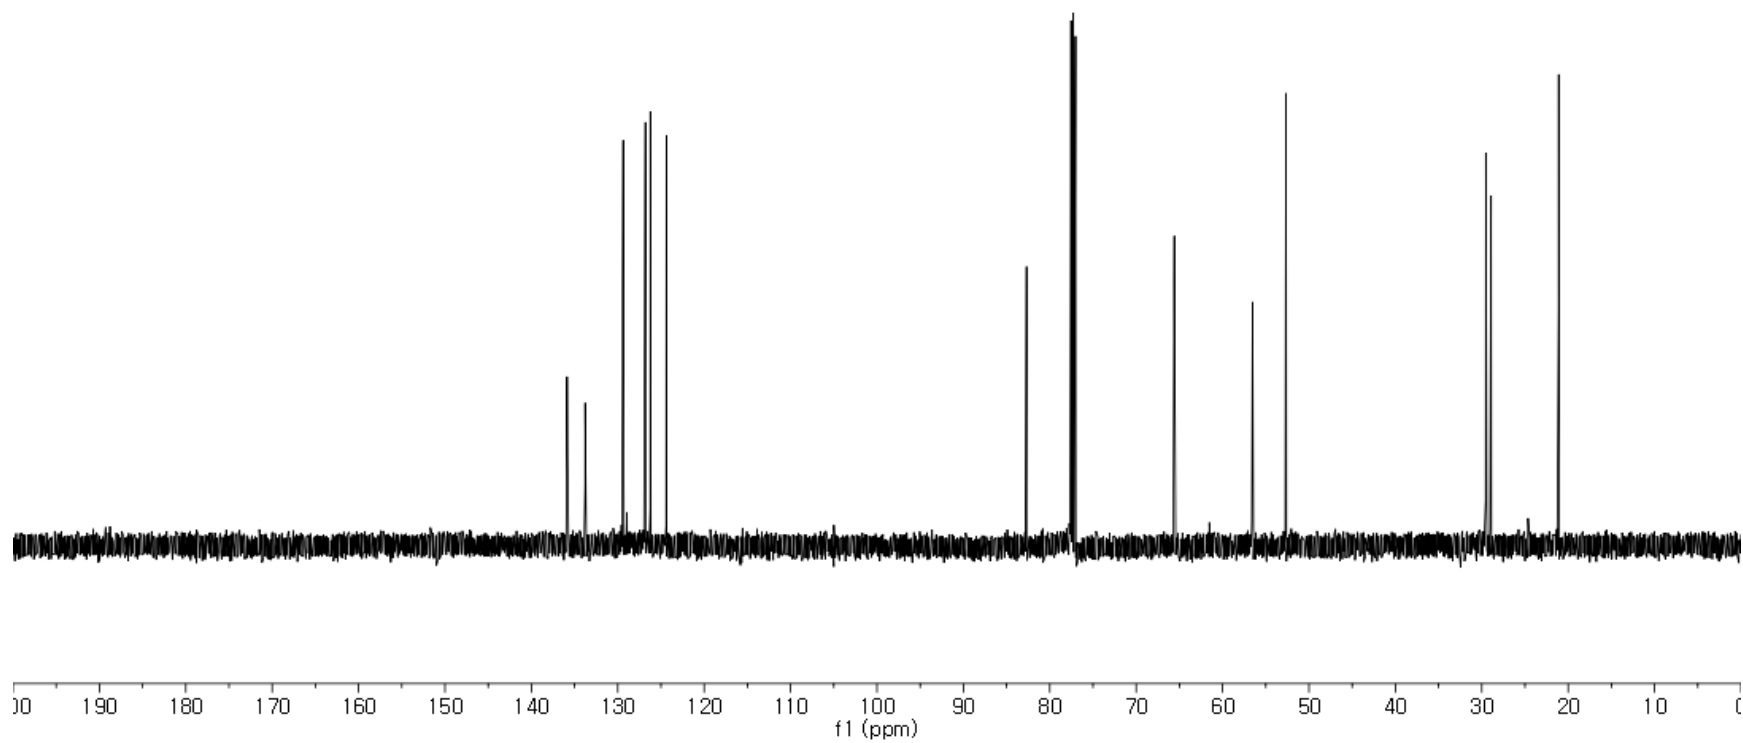

$^1\text{H}$  NMR of **13** in  $\text{CDCl}_3$

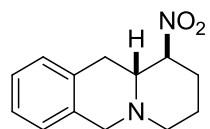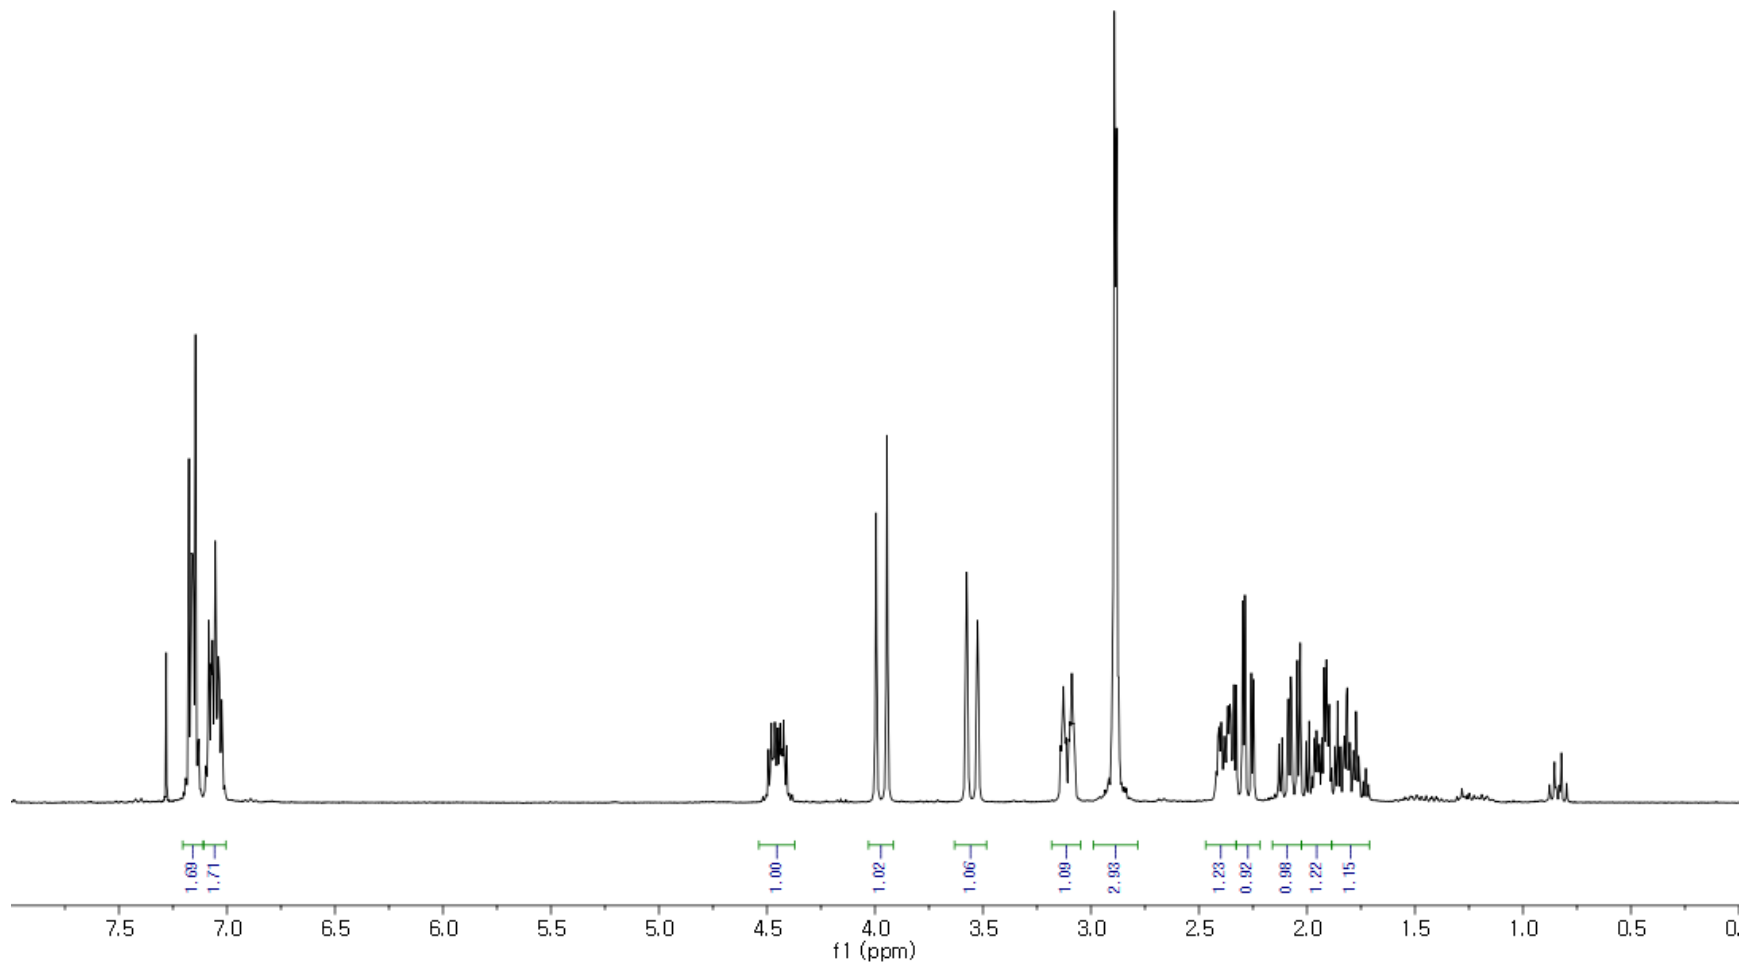

$^{13}\text{C}$  NMR of **13** in  $\text{CDCl}_3$

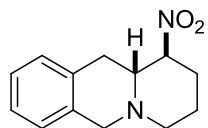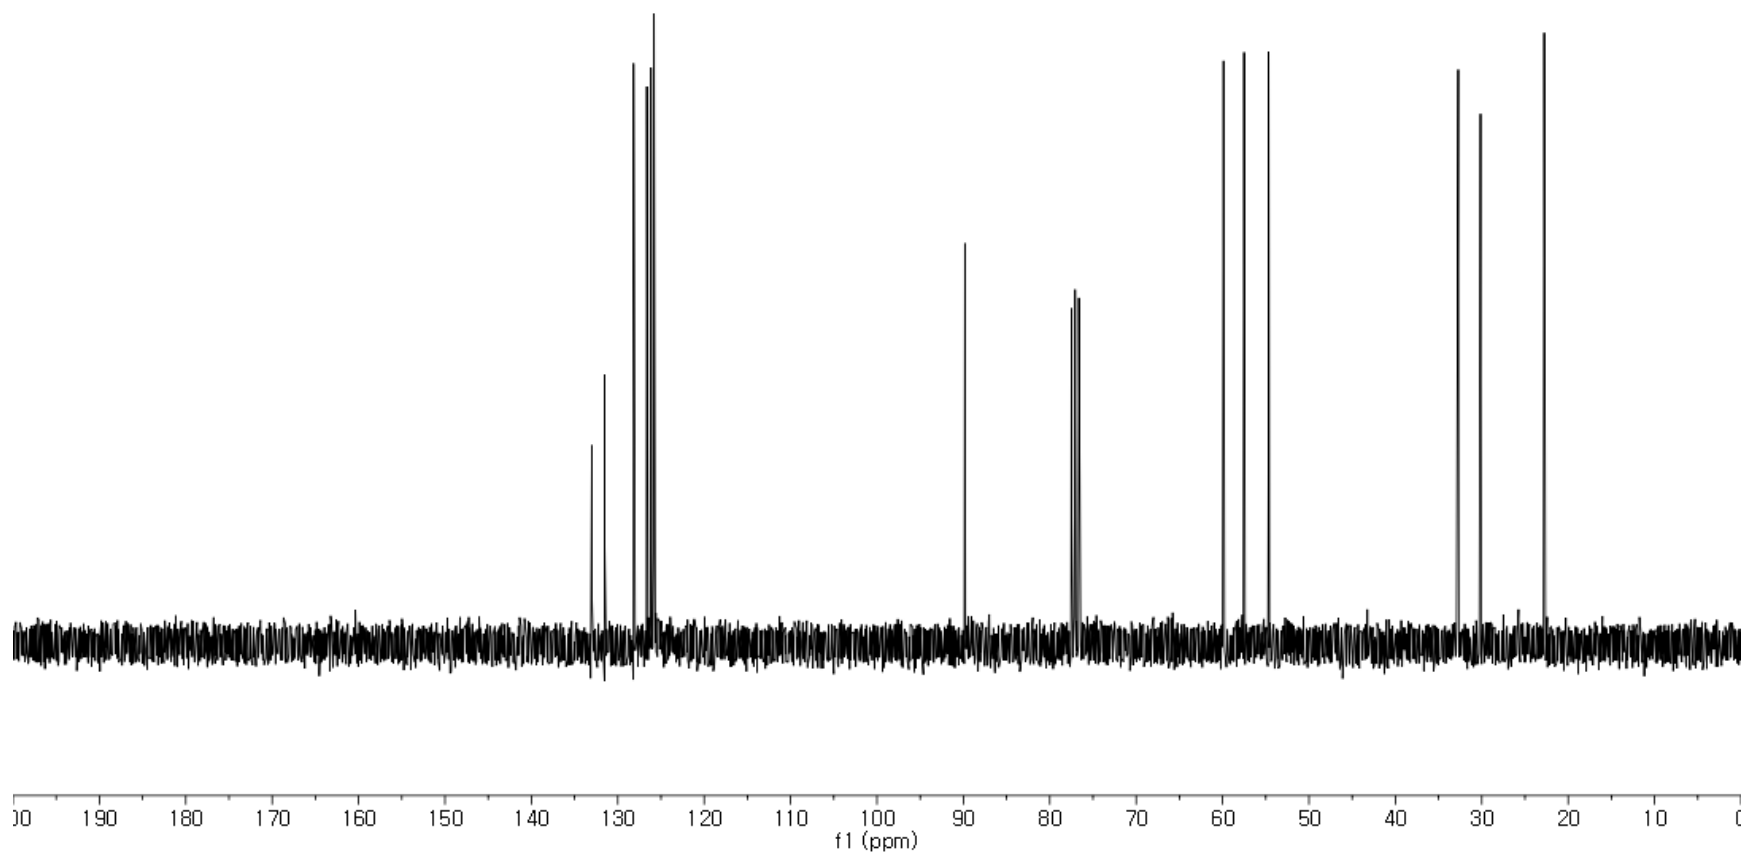

$^1\text{H}$  NMR of **15** in  $\text{CDCl}_3$

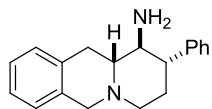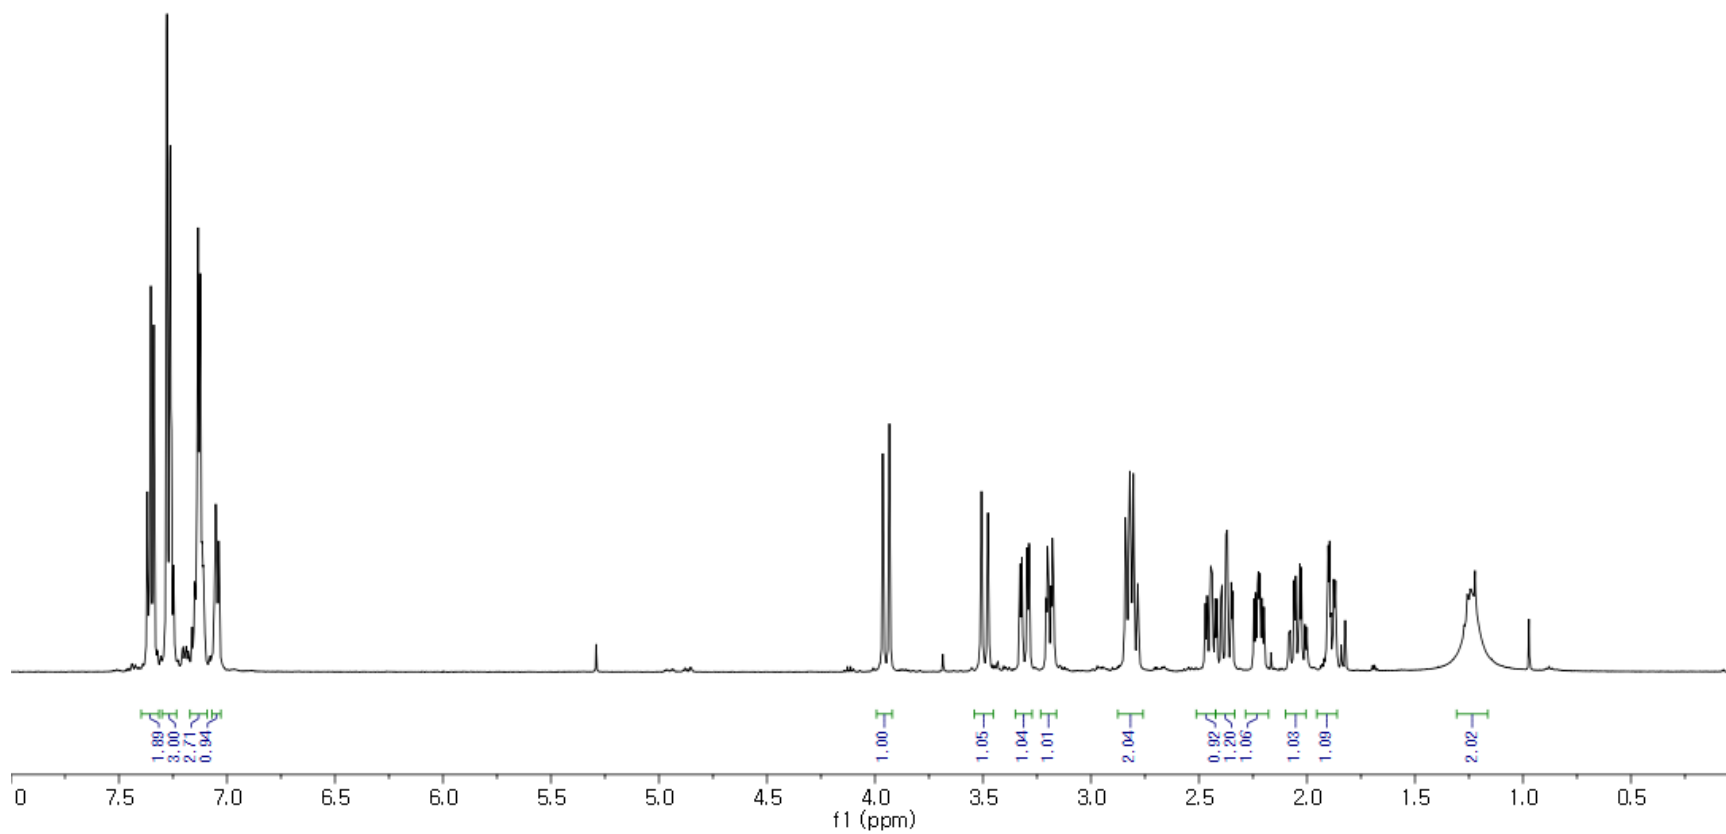



$^{13}\text{C}$  NMR of **15** in  $\text{CDCl}_3$

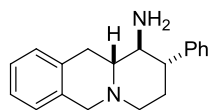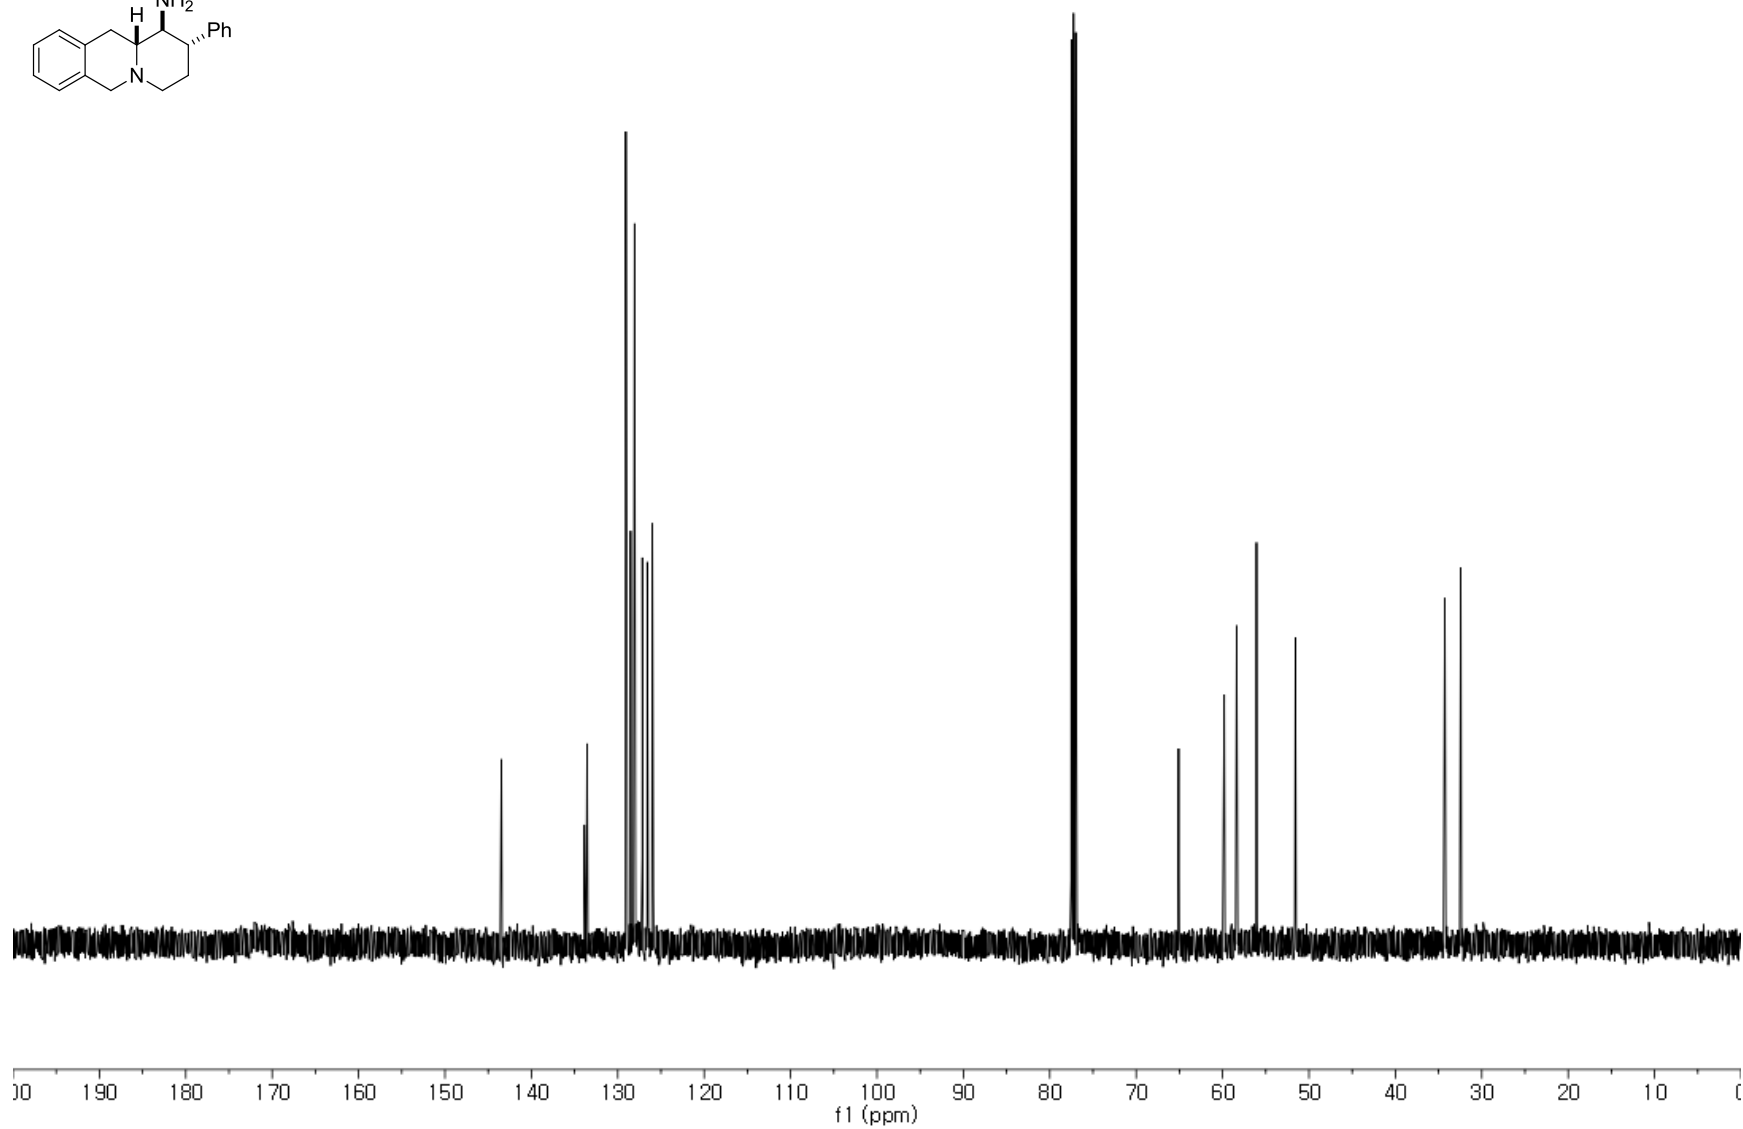

$^1\text{H}$  NMR of **16** in  $\text{CDCl}_3$

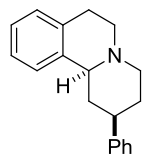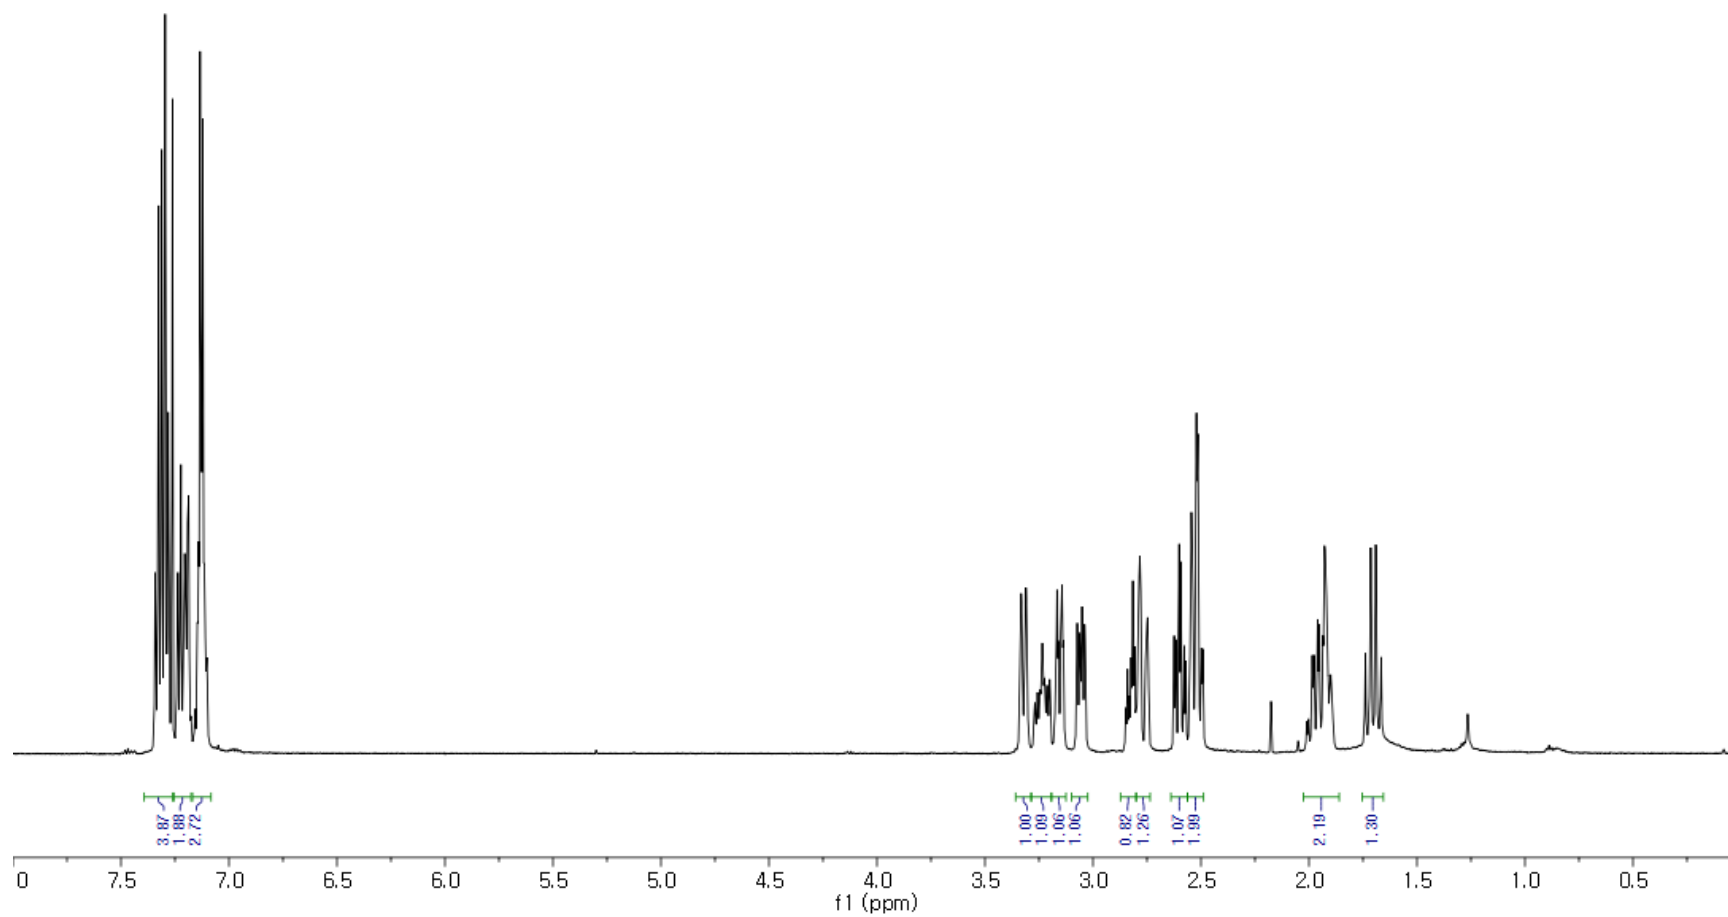

$^{13}\text{C}$  NMR of **16** in  $\text{CDCl}_3$

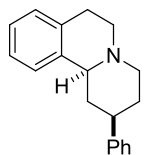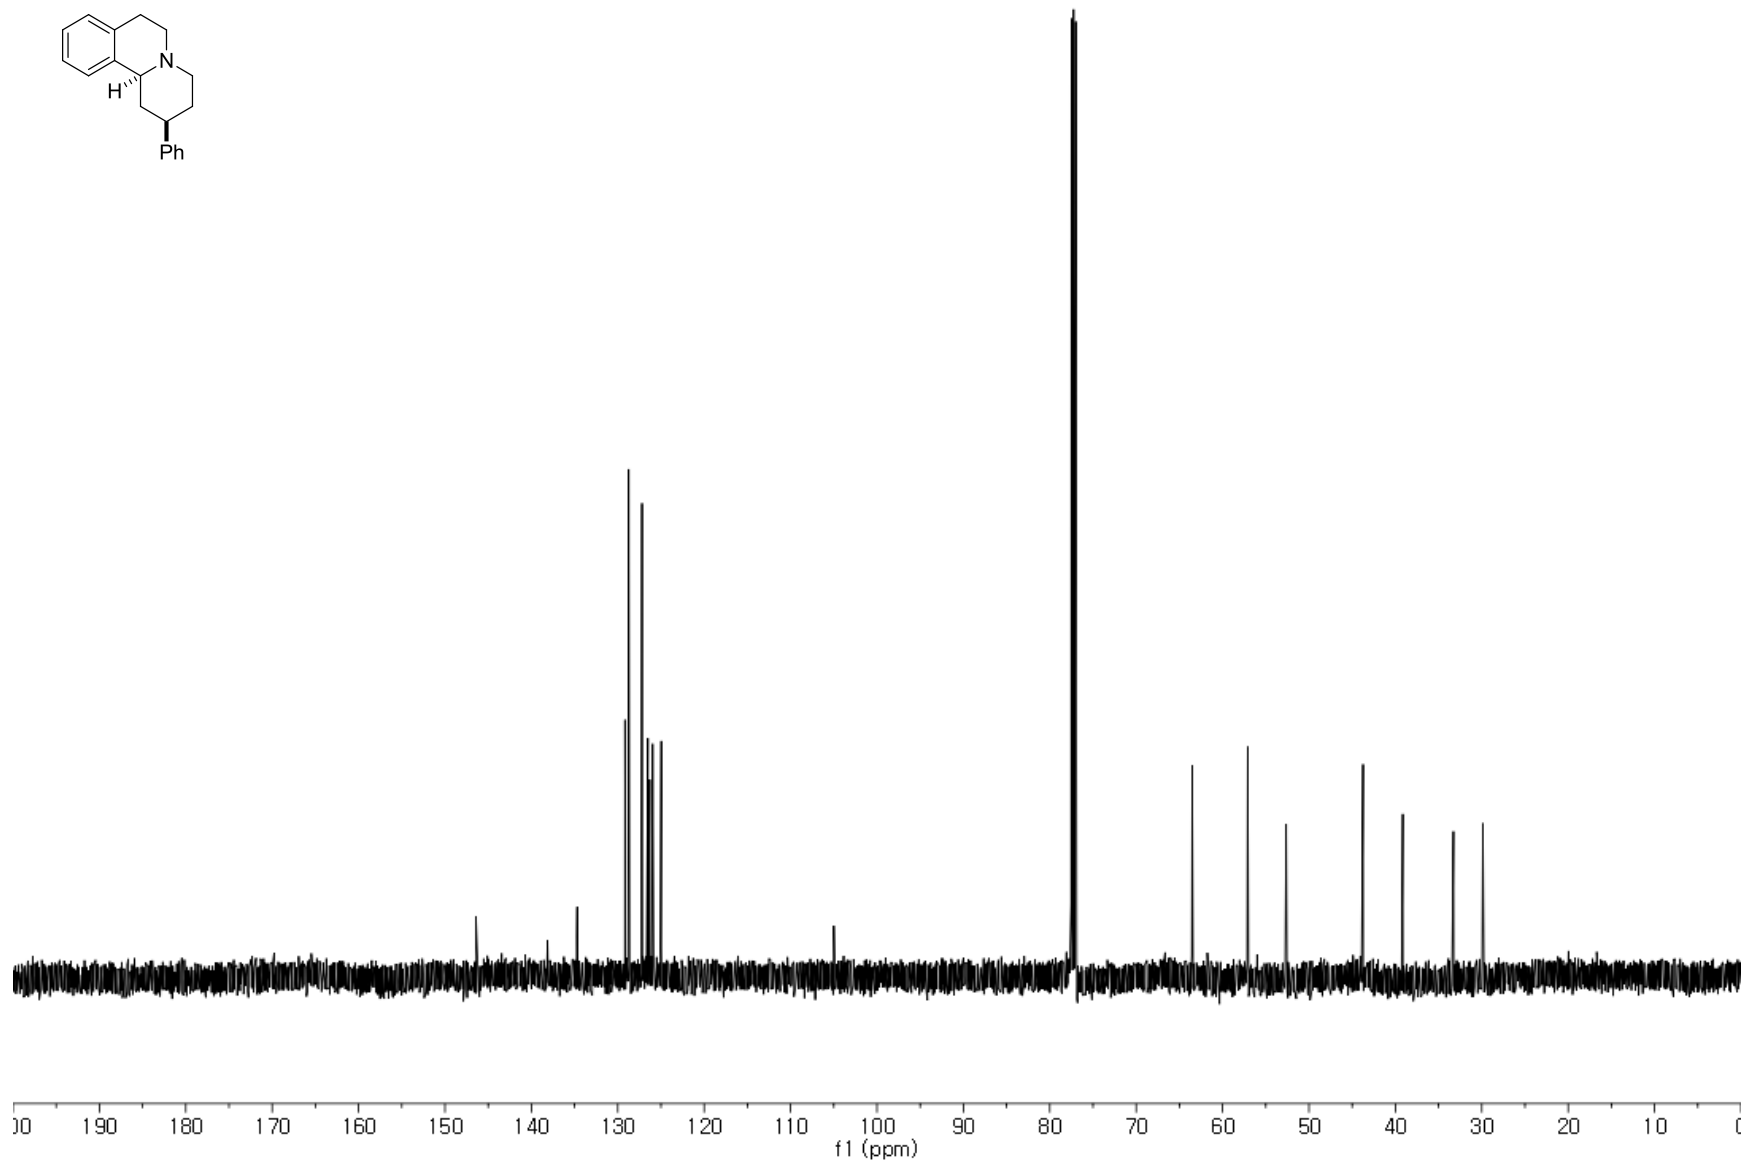

$^1\text{H}$  NMR of 17 in  $\text{CDCl}_3$

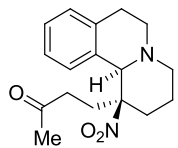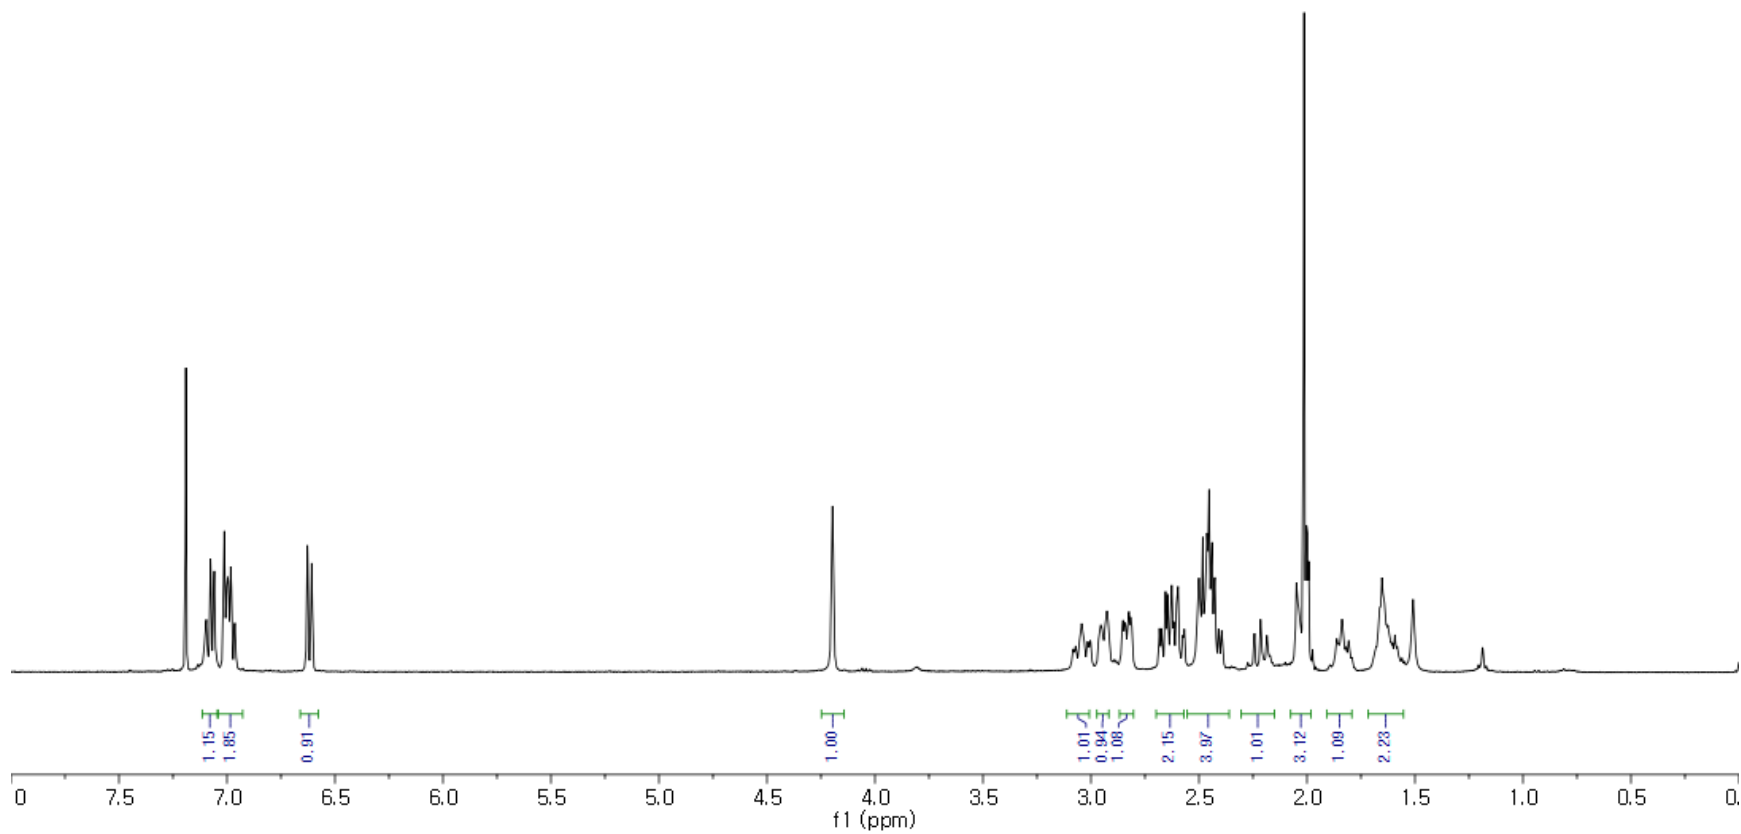

$^{13}\text{C}$  NMR of **17** in  $\text{CDCl}_3$

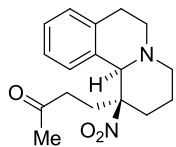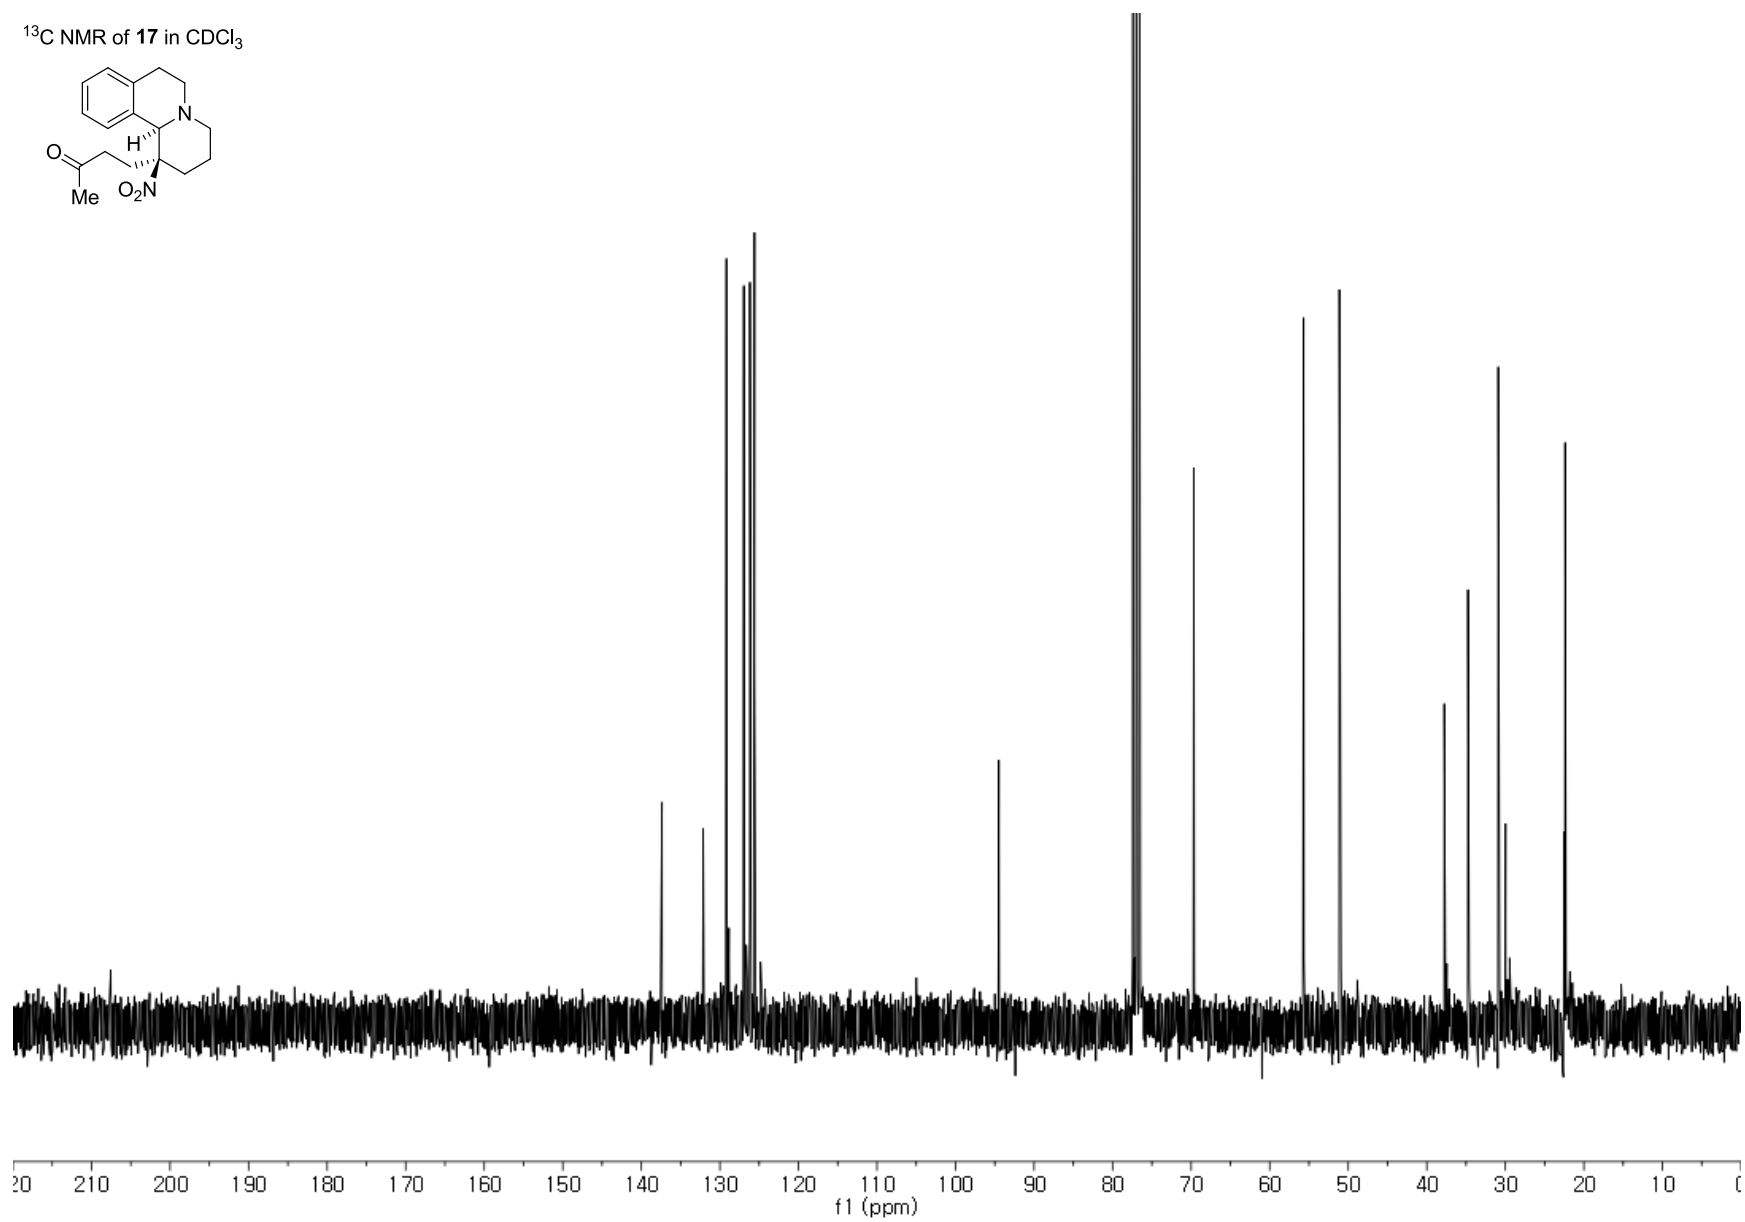





<sup>1</sup>H NMR of **19** in CDCl<sub>3</sub>

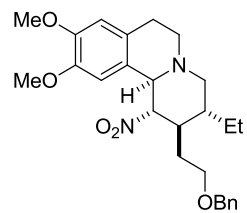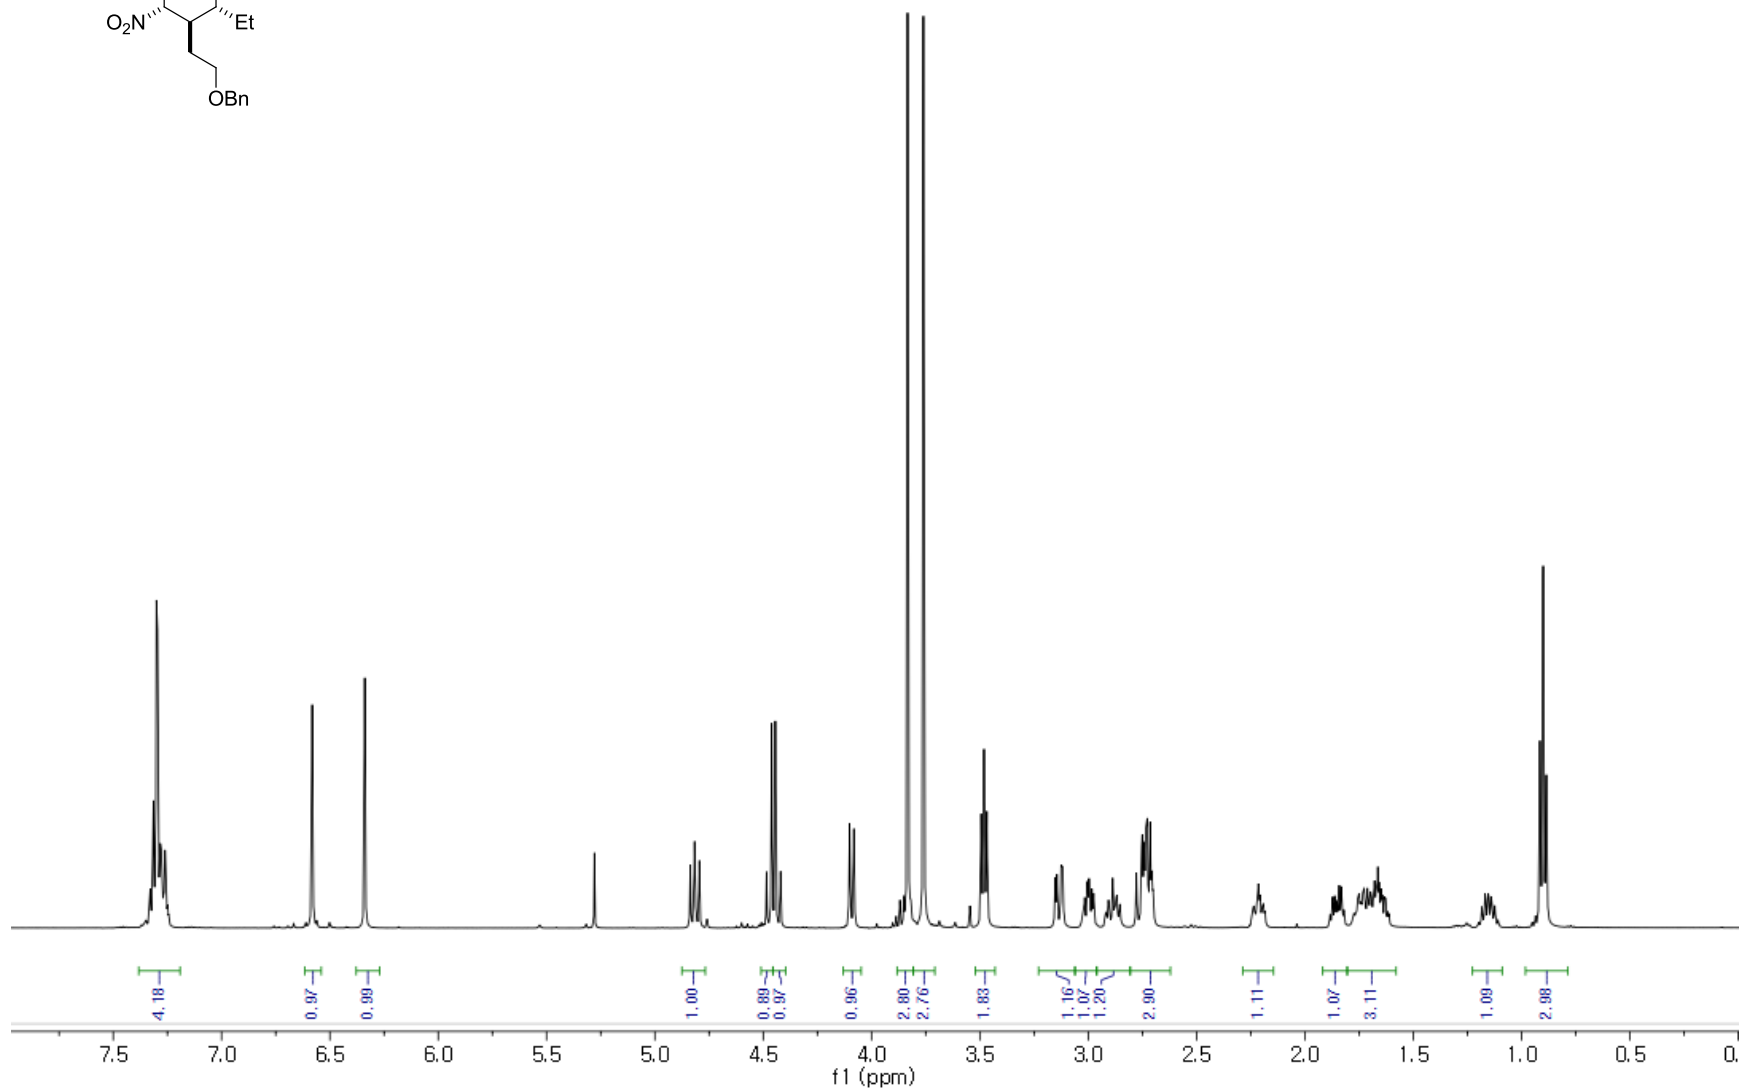



$^{13}\text{C}$  NMR of **19** in  $\text{CDCl}_3$

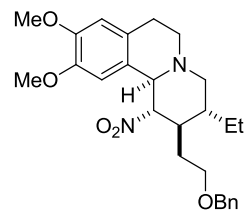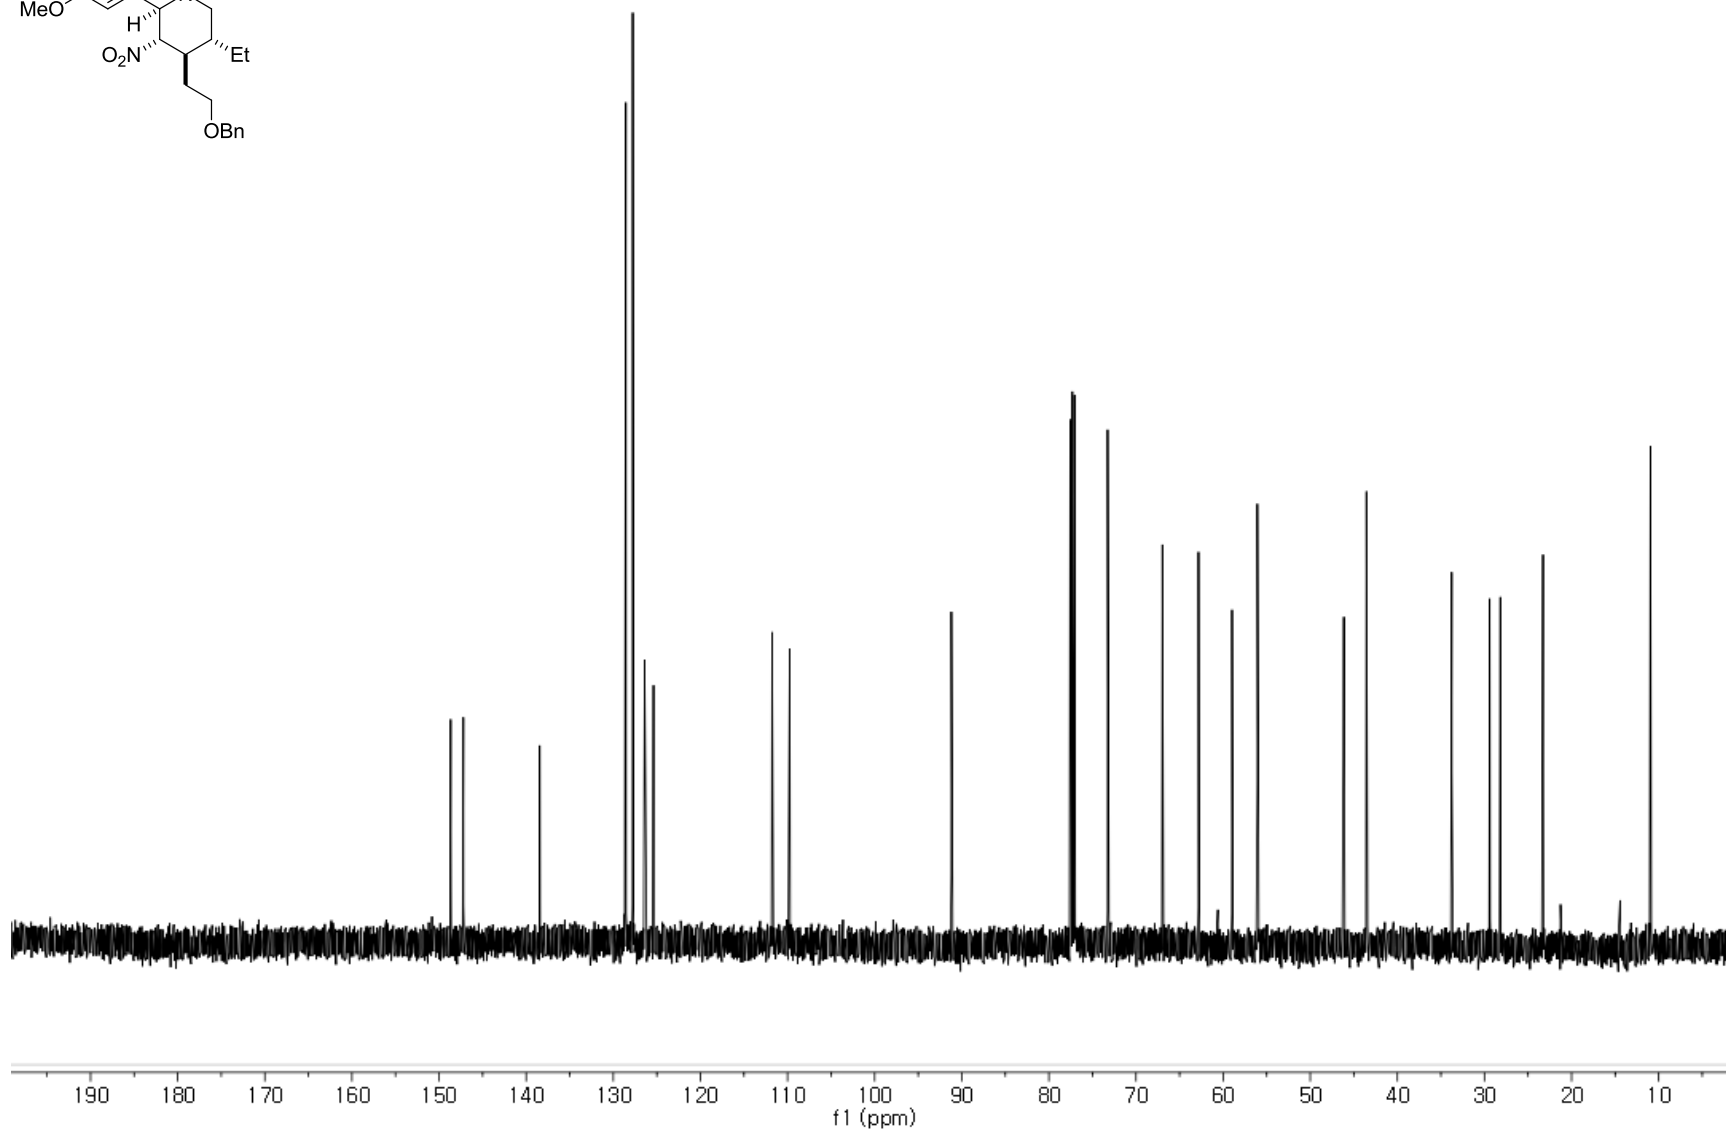

<sup>1</sup>H NMR of **19'** in CDCl<sub>3</sub>

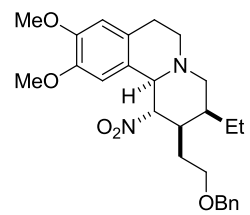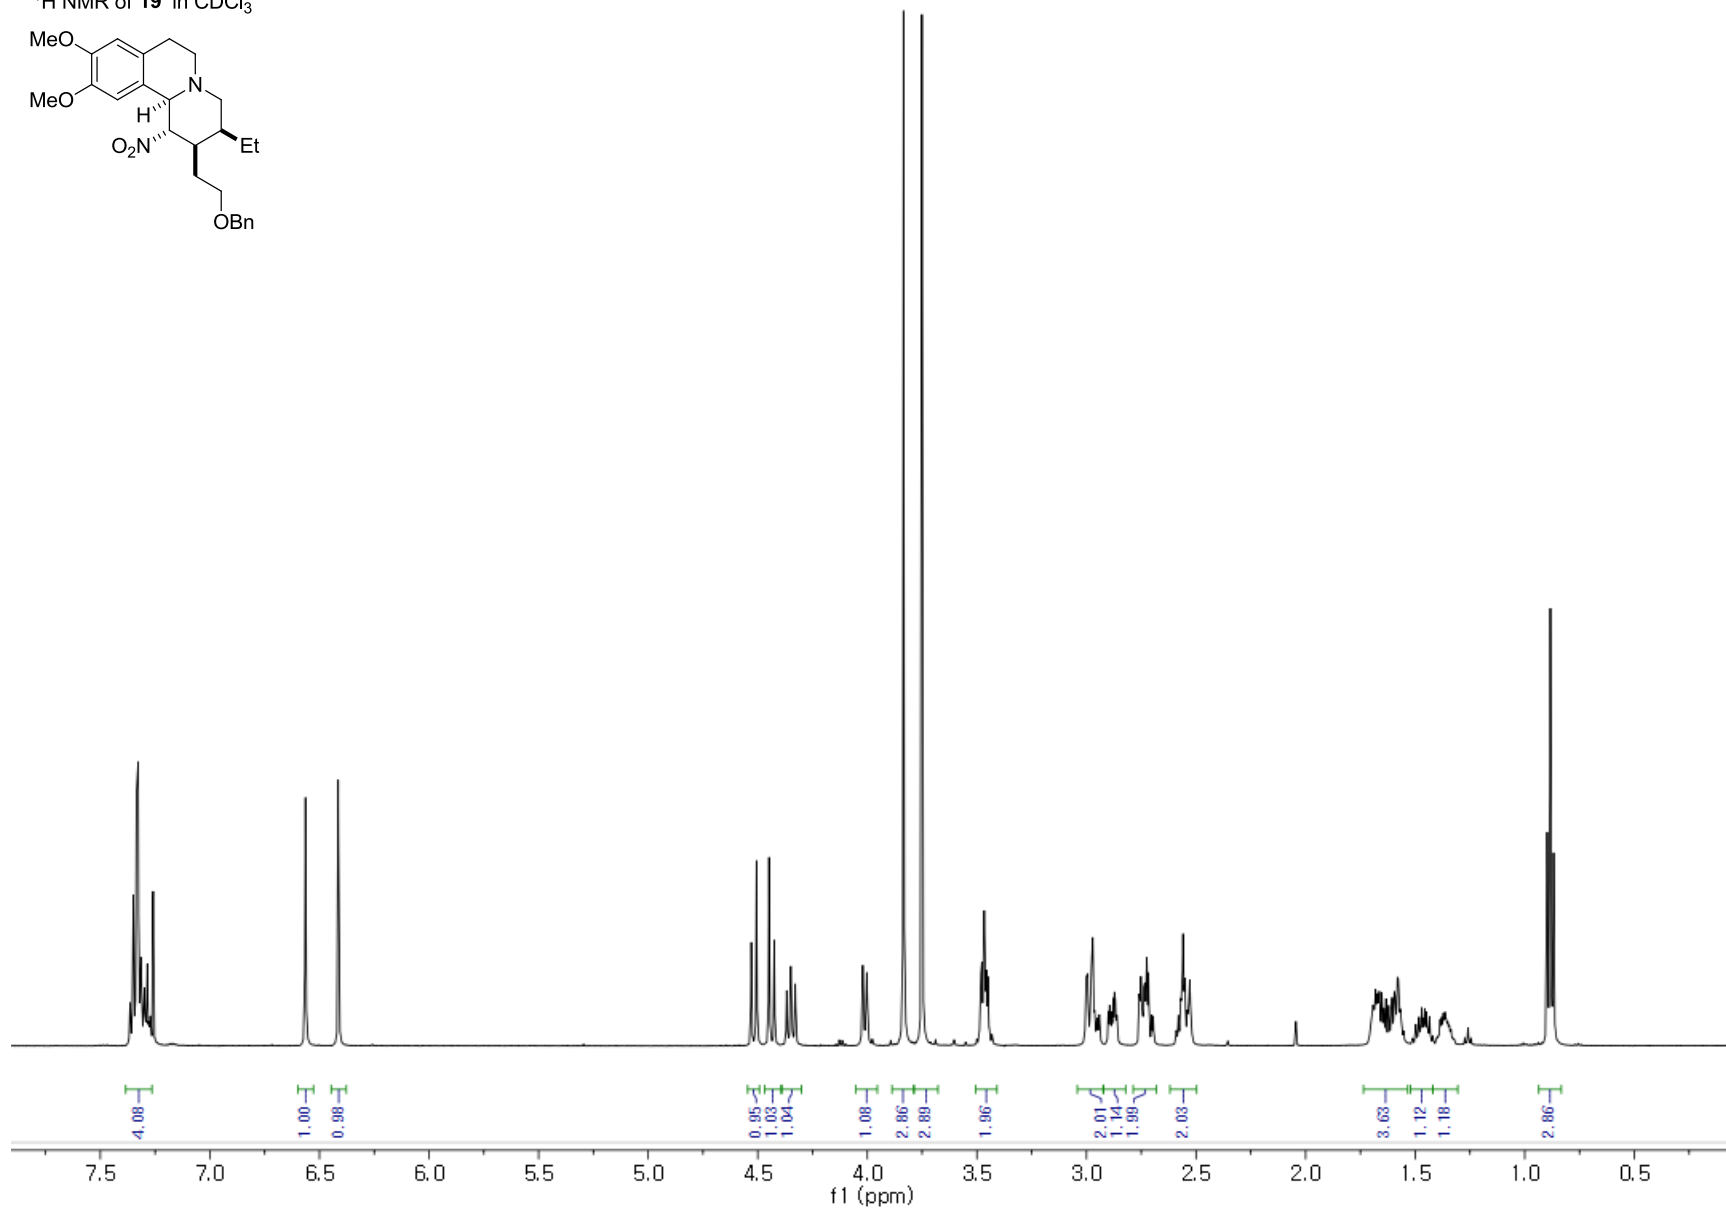

<sup>13</sup>C NMR of **19'** in CDCl<sub>3</sub>

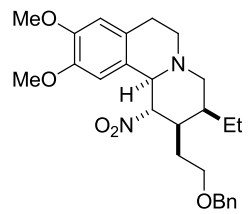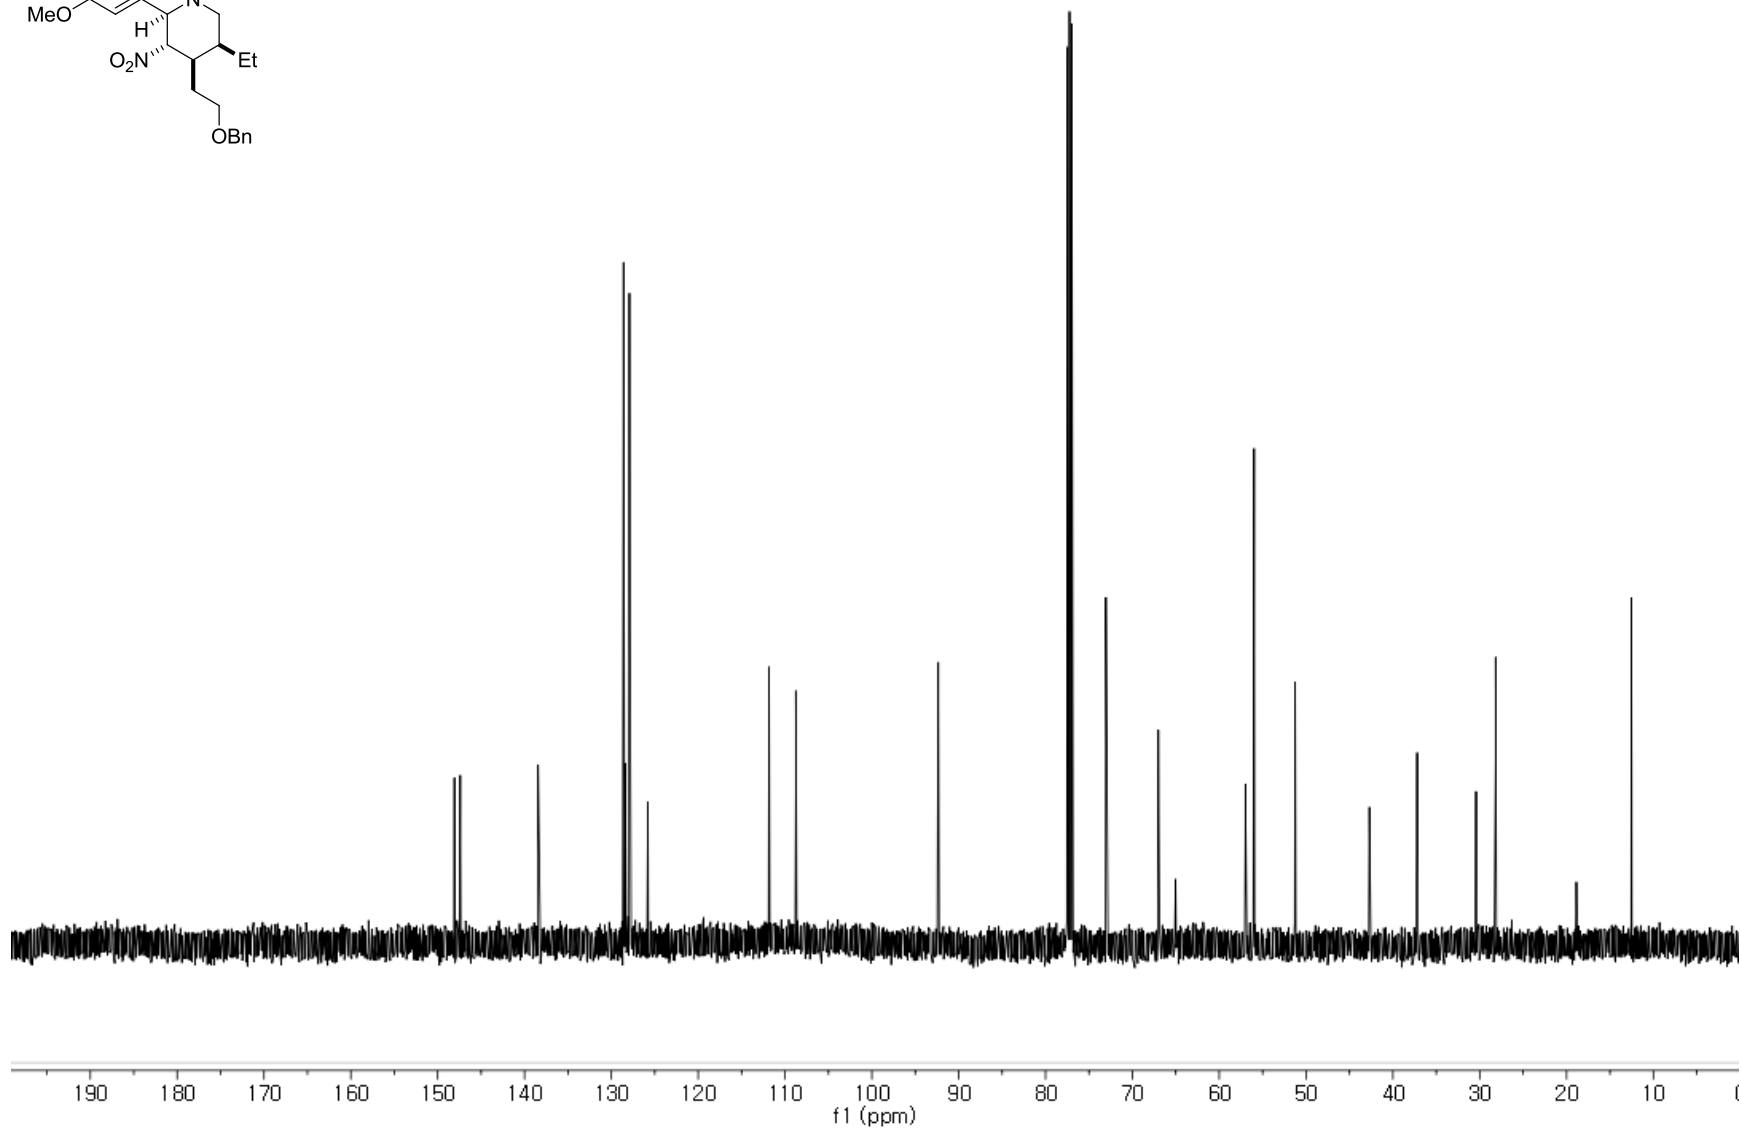

<sup>1</sup>H NMR of **19''** in CDCl<sub>3</sub>

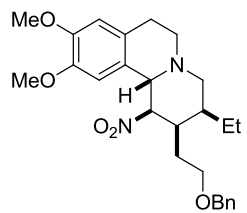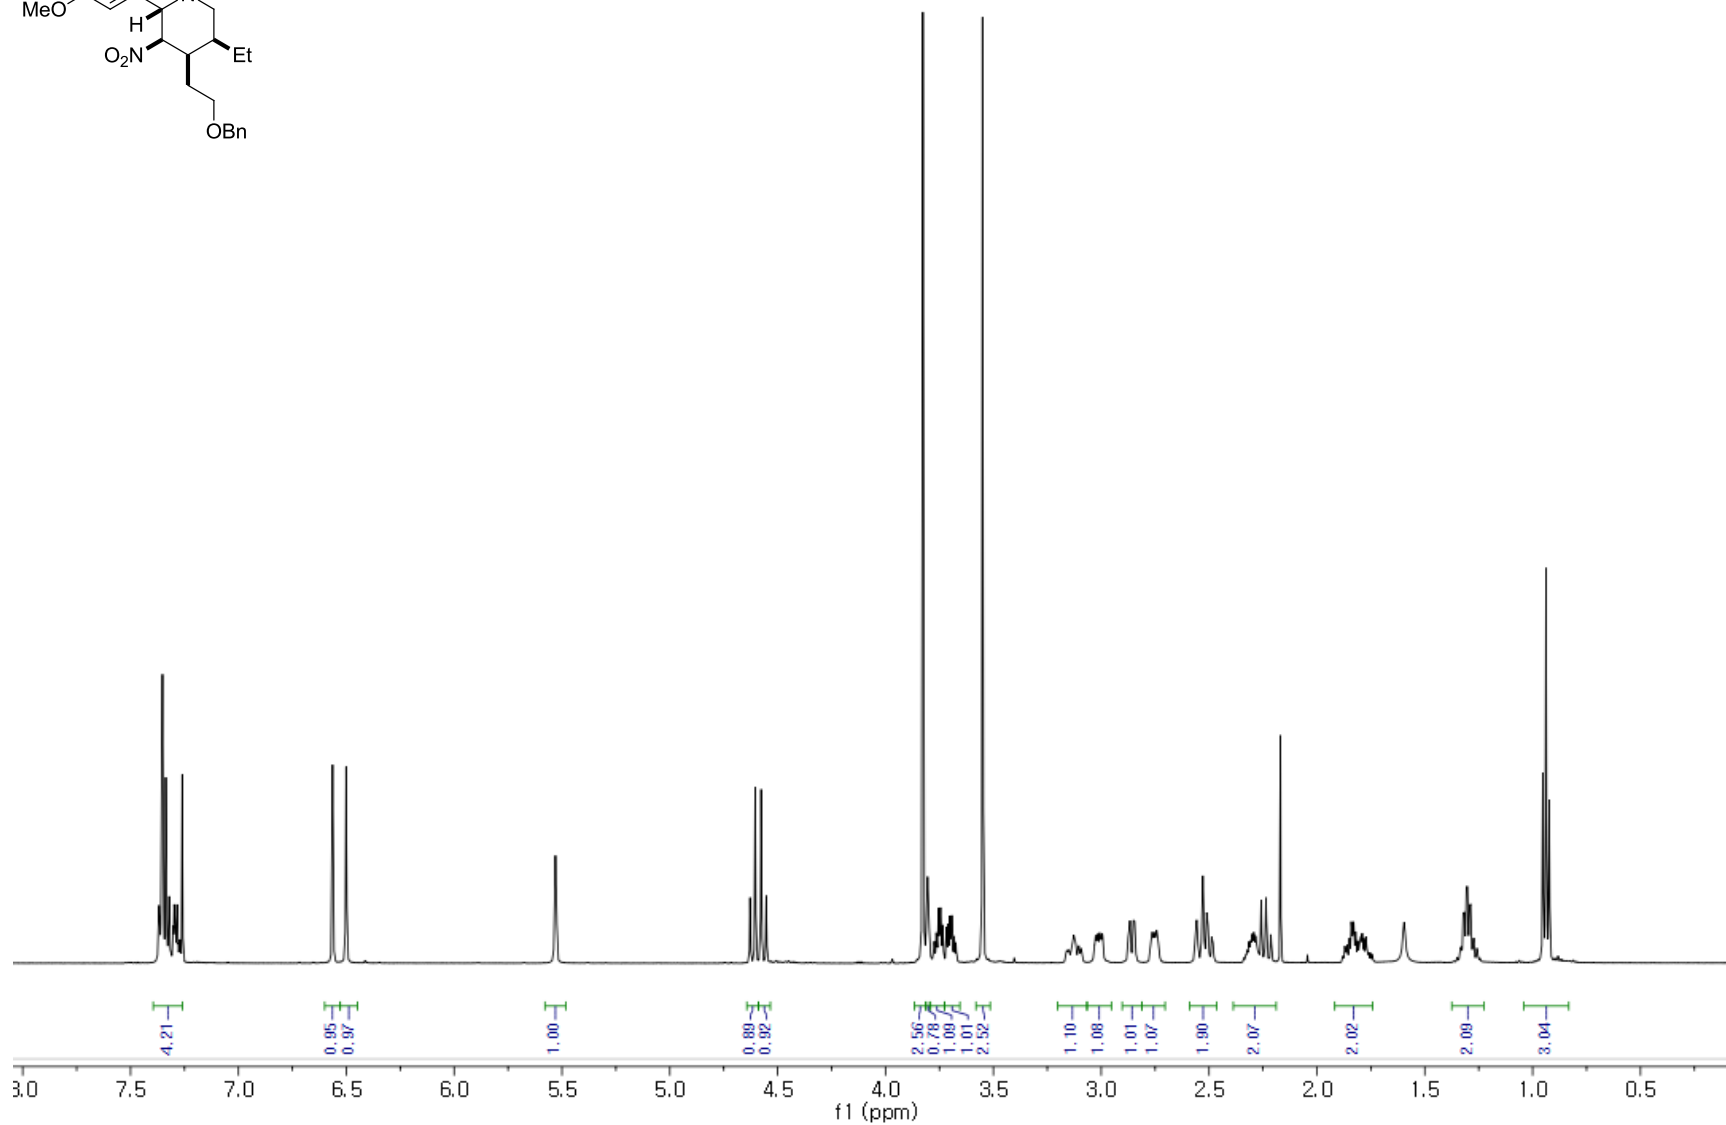

<sup>13</sup>C NMR of **19''** in CDCl<sub>3</sub>

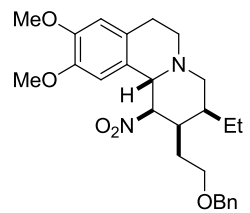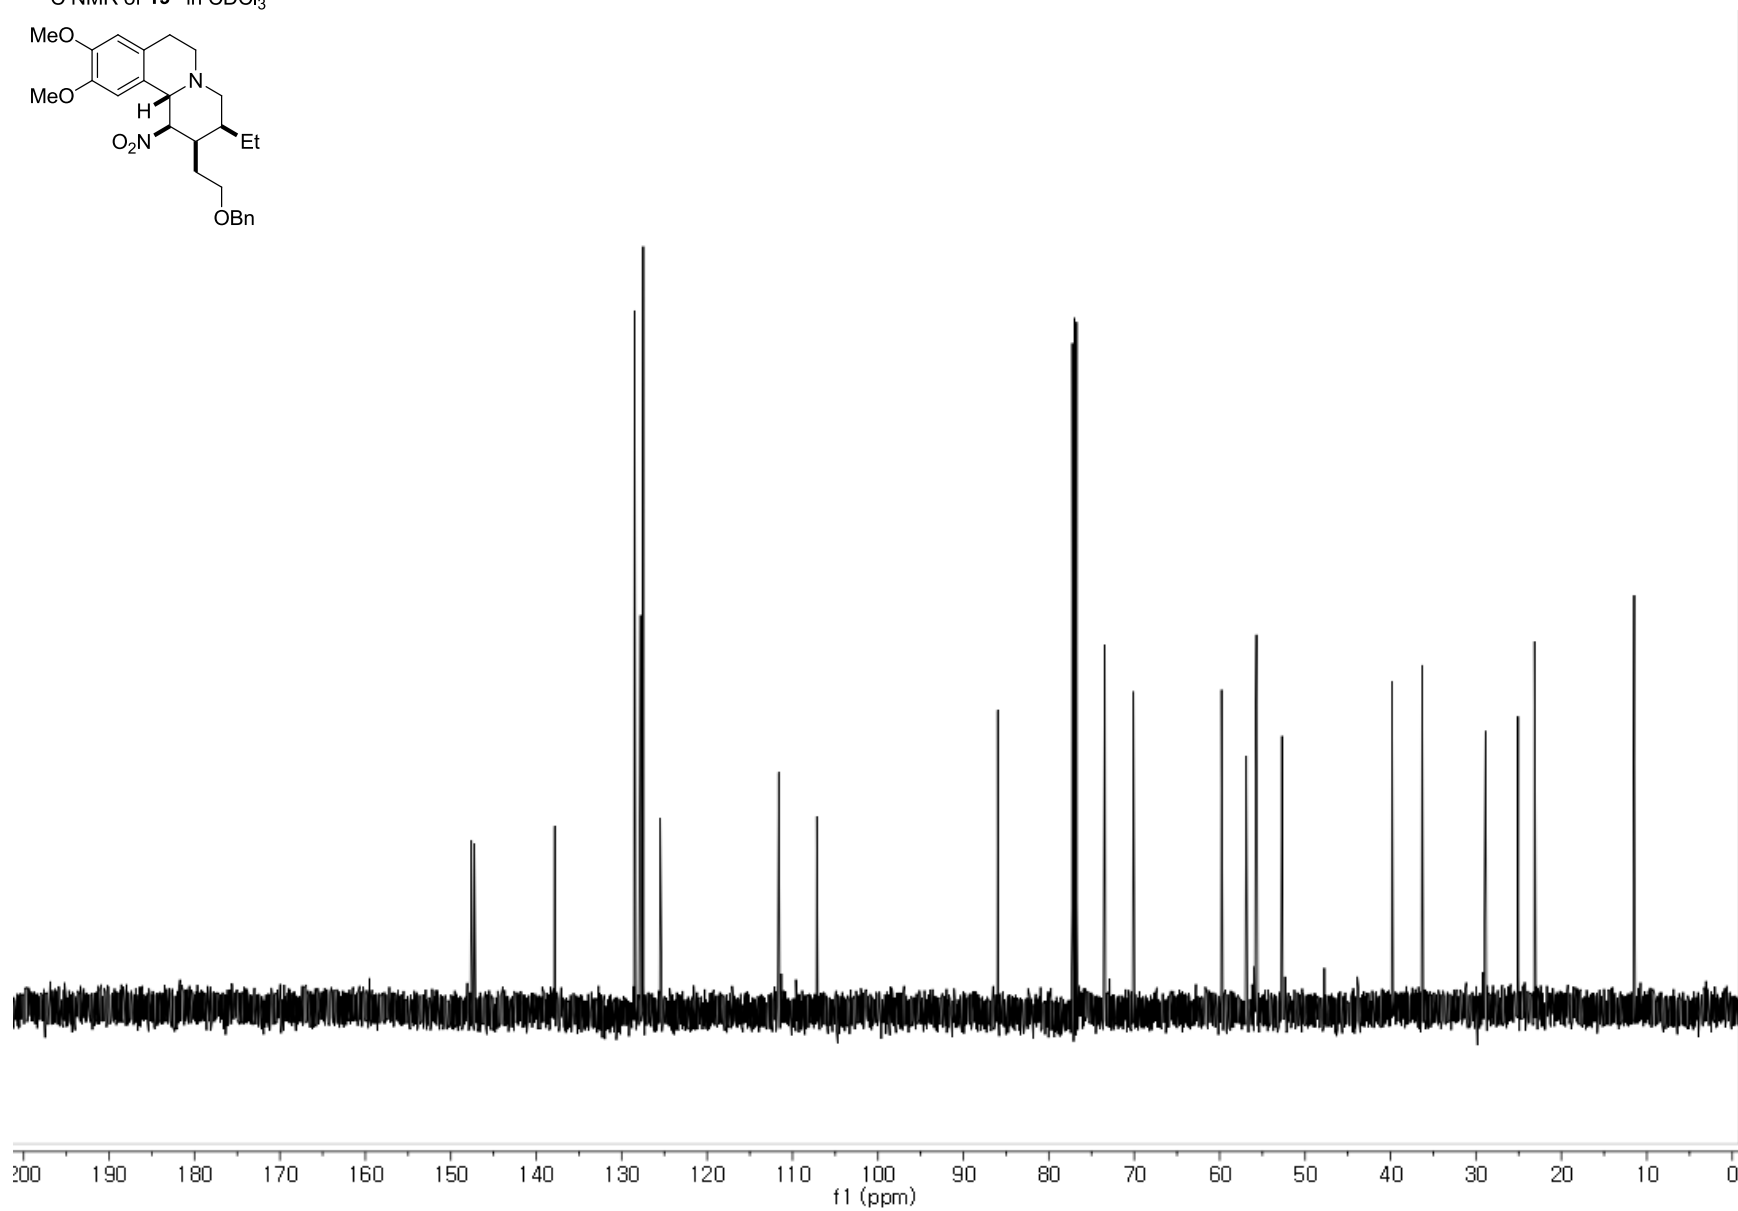

<sup>1</sup>H NMR of (-)-protoemetinol in CDCl<sub>3</sub>

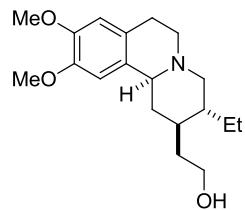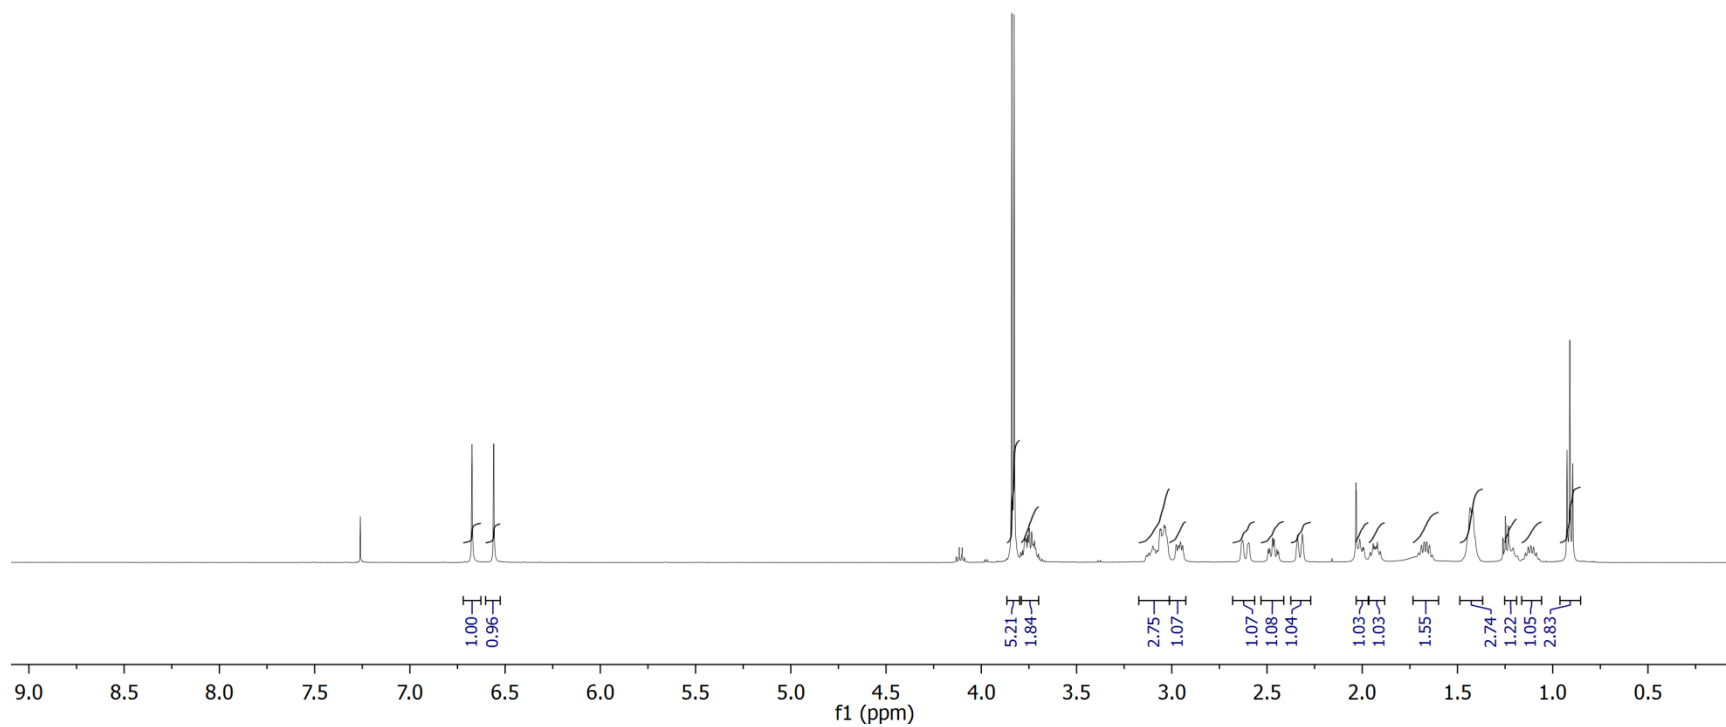

<sup>13</sup>C NMR of (-)-protoemetinol in CDCl<sub>3</sub>

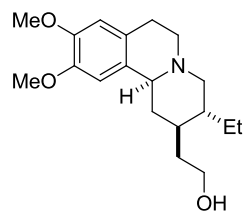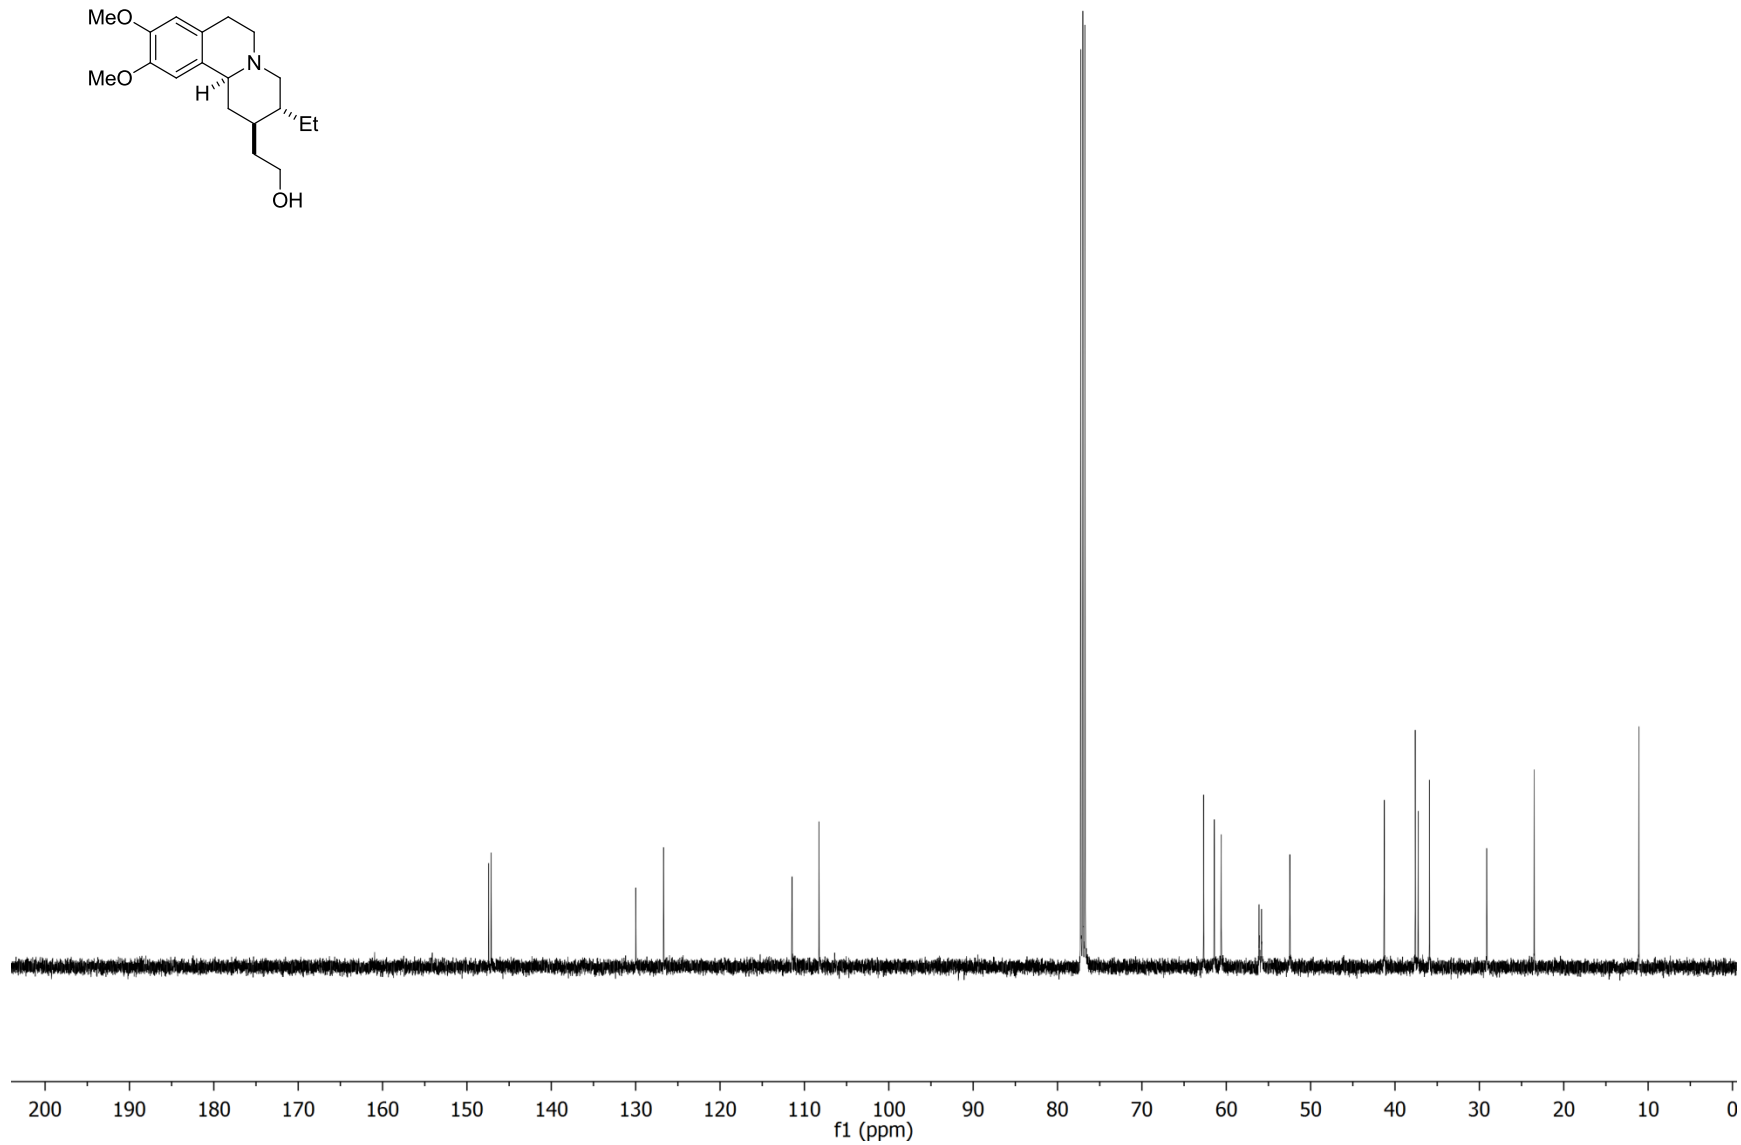

Gcosy of **6a** in CDCl<sub>3</sub>

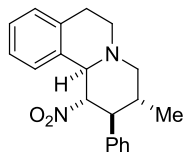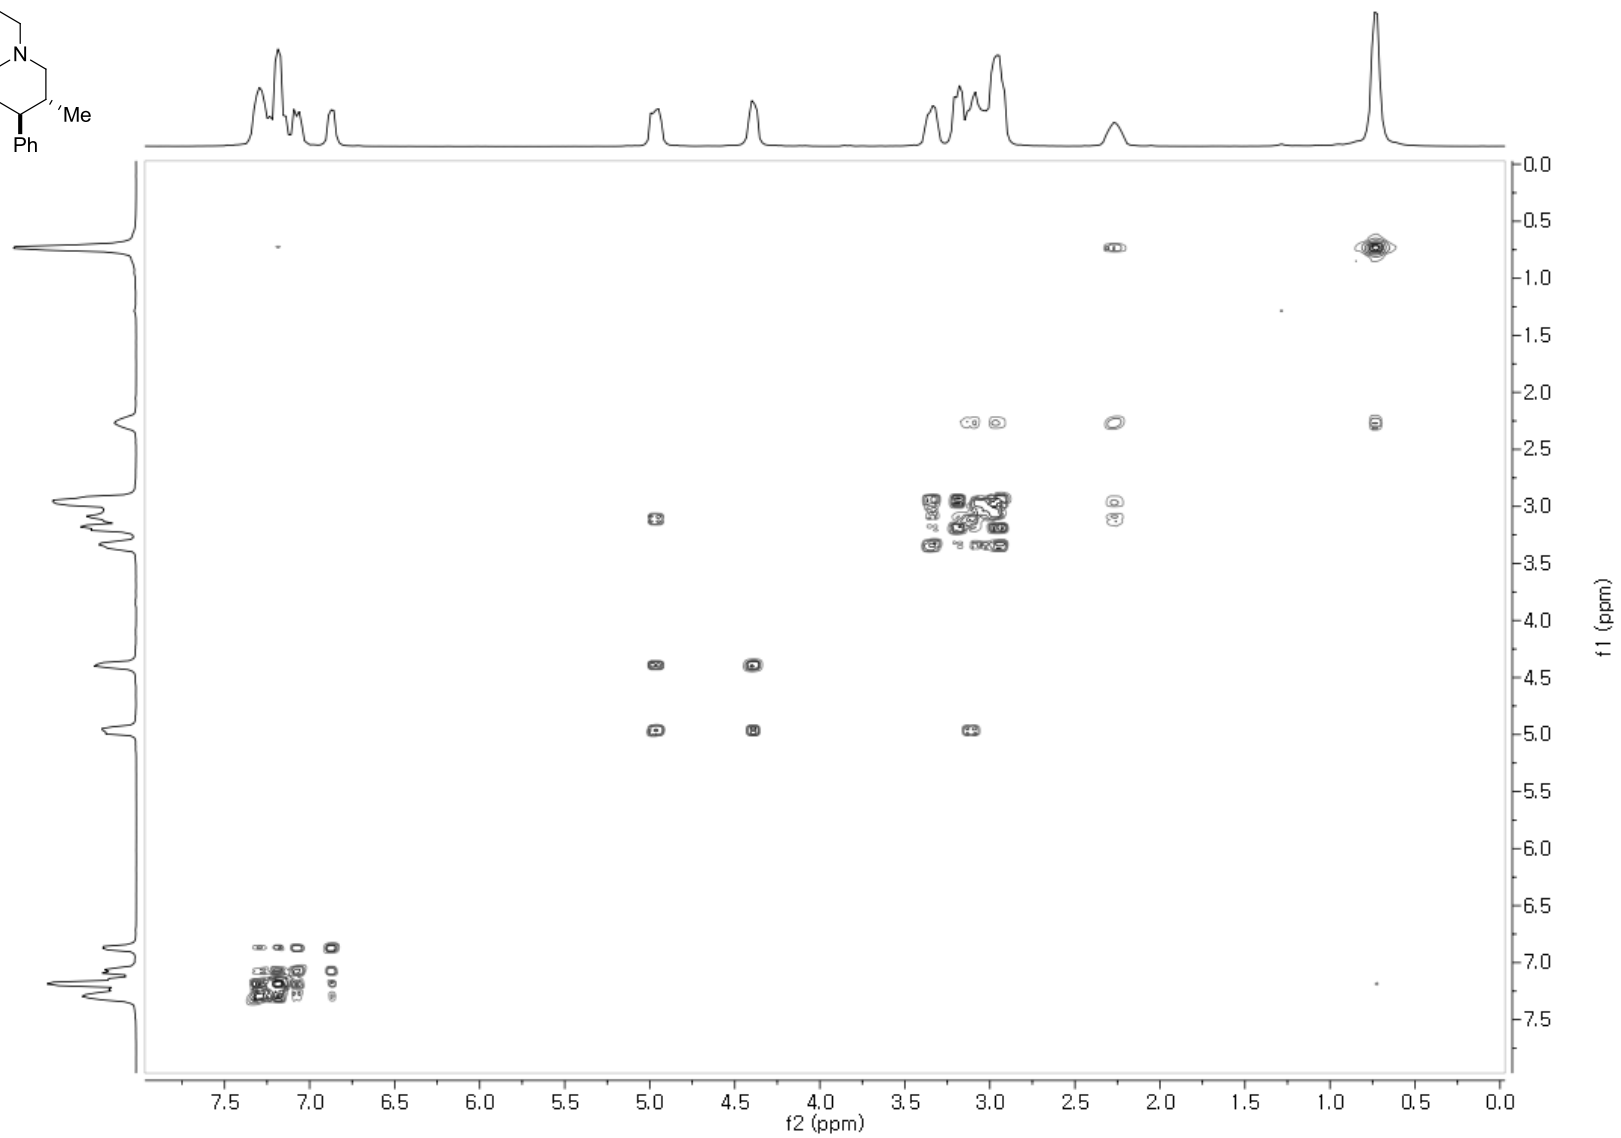



Noesy of **6a** in CDCl<sub>3</sub>

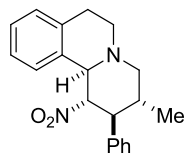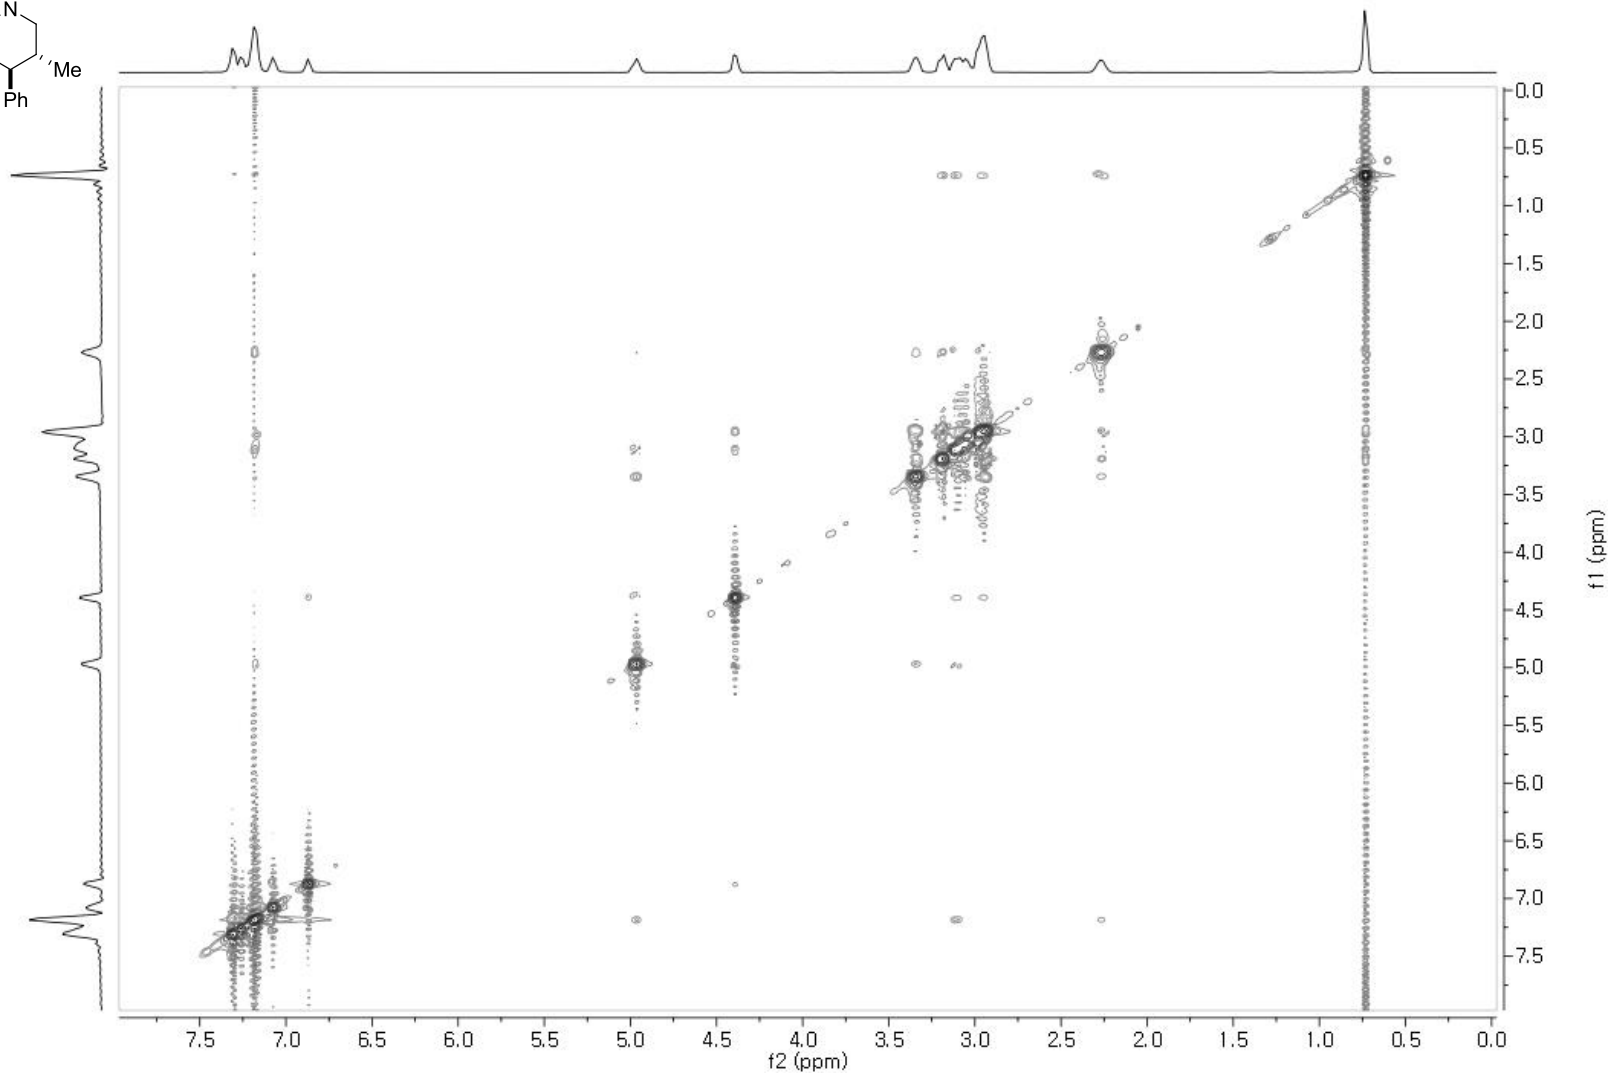

Gcosy of 7a in CDCl<sub>3</sub>

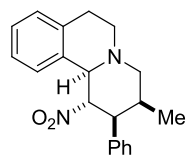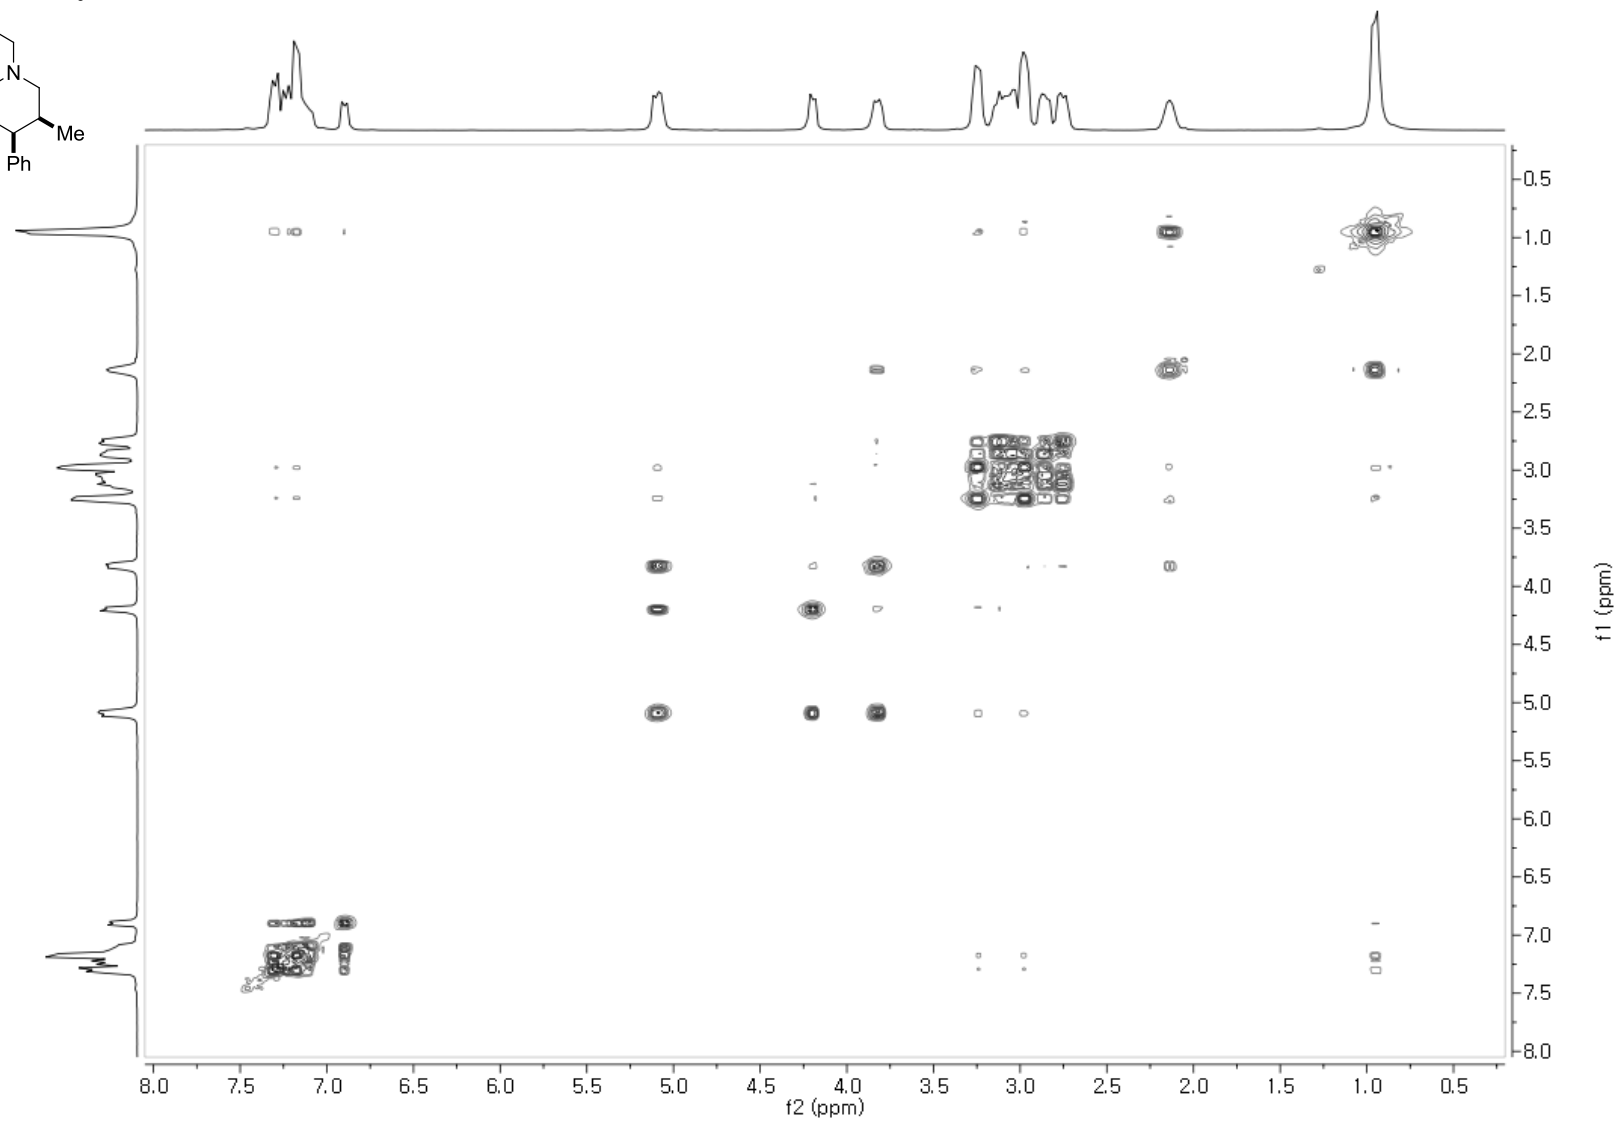

Noesy of 7a in CDCl<sub>3</sub>

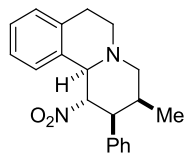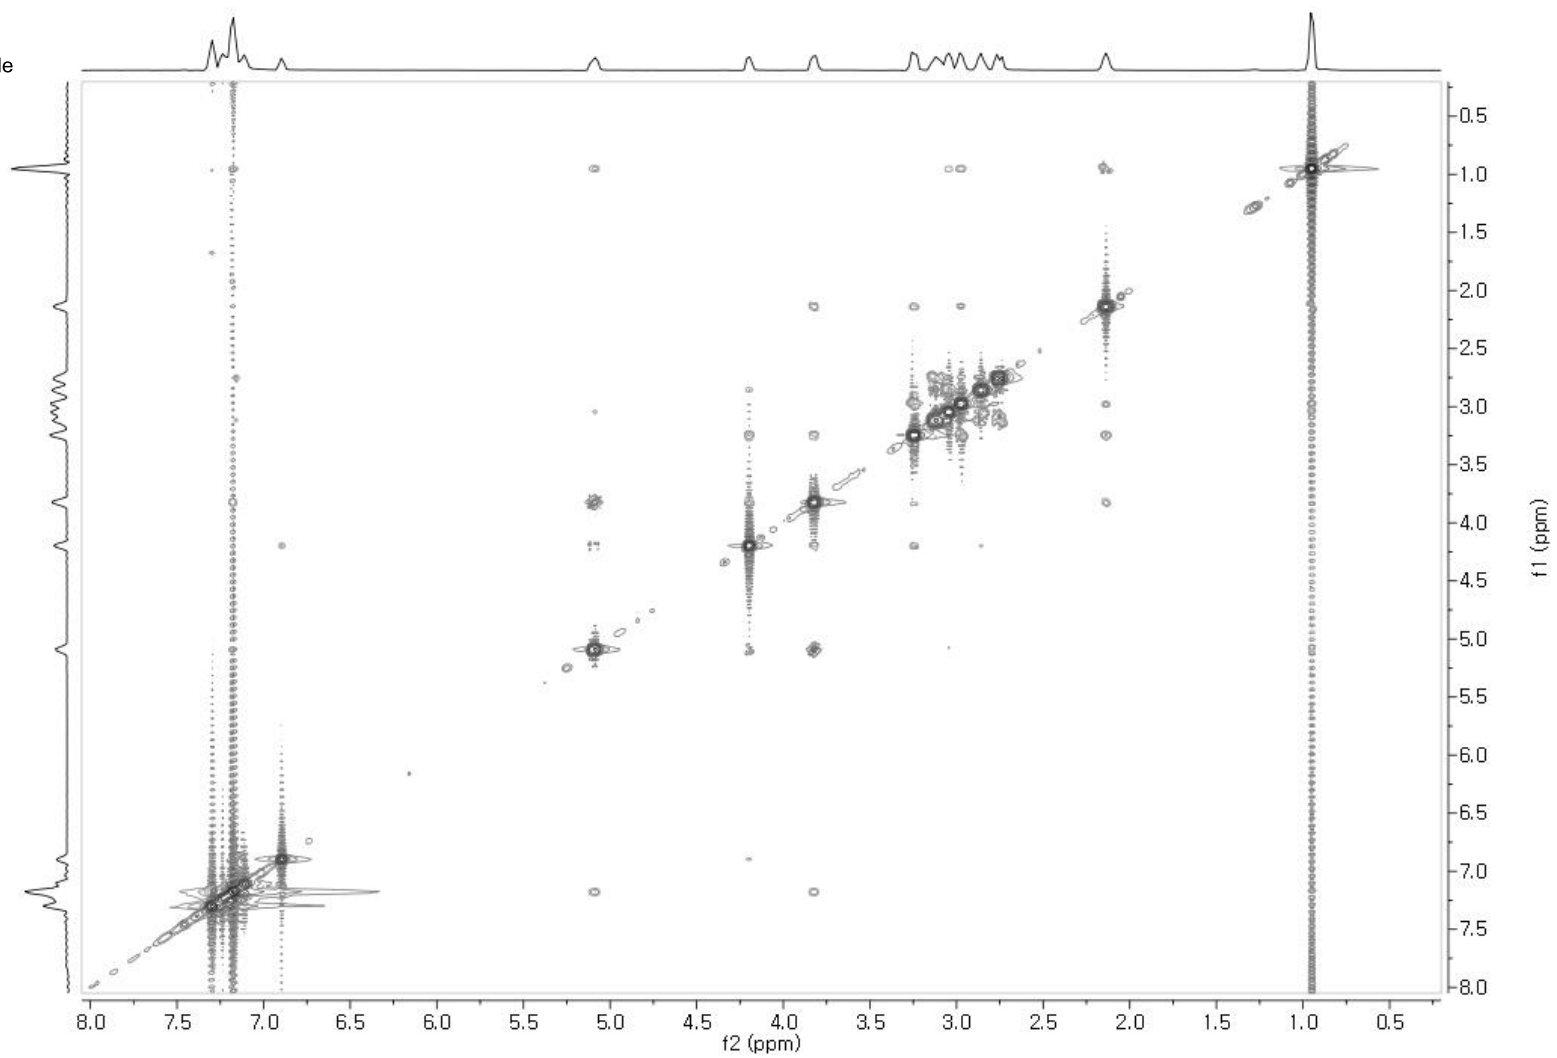

Gcosy of **6k** in CDCl<sub>3</sub>

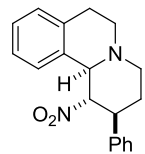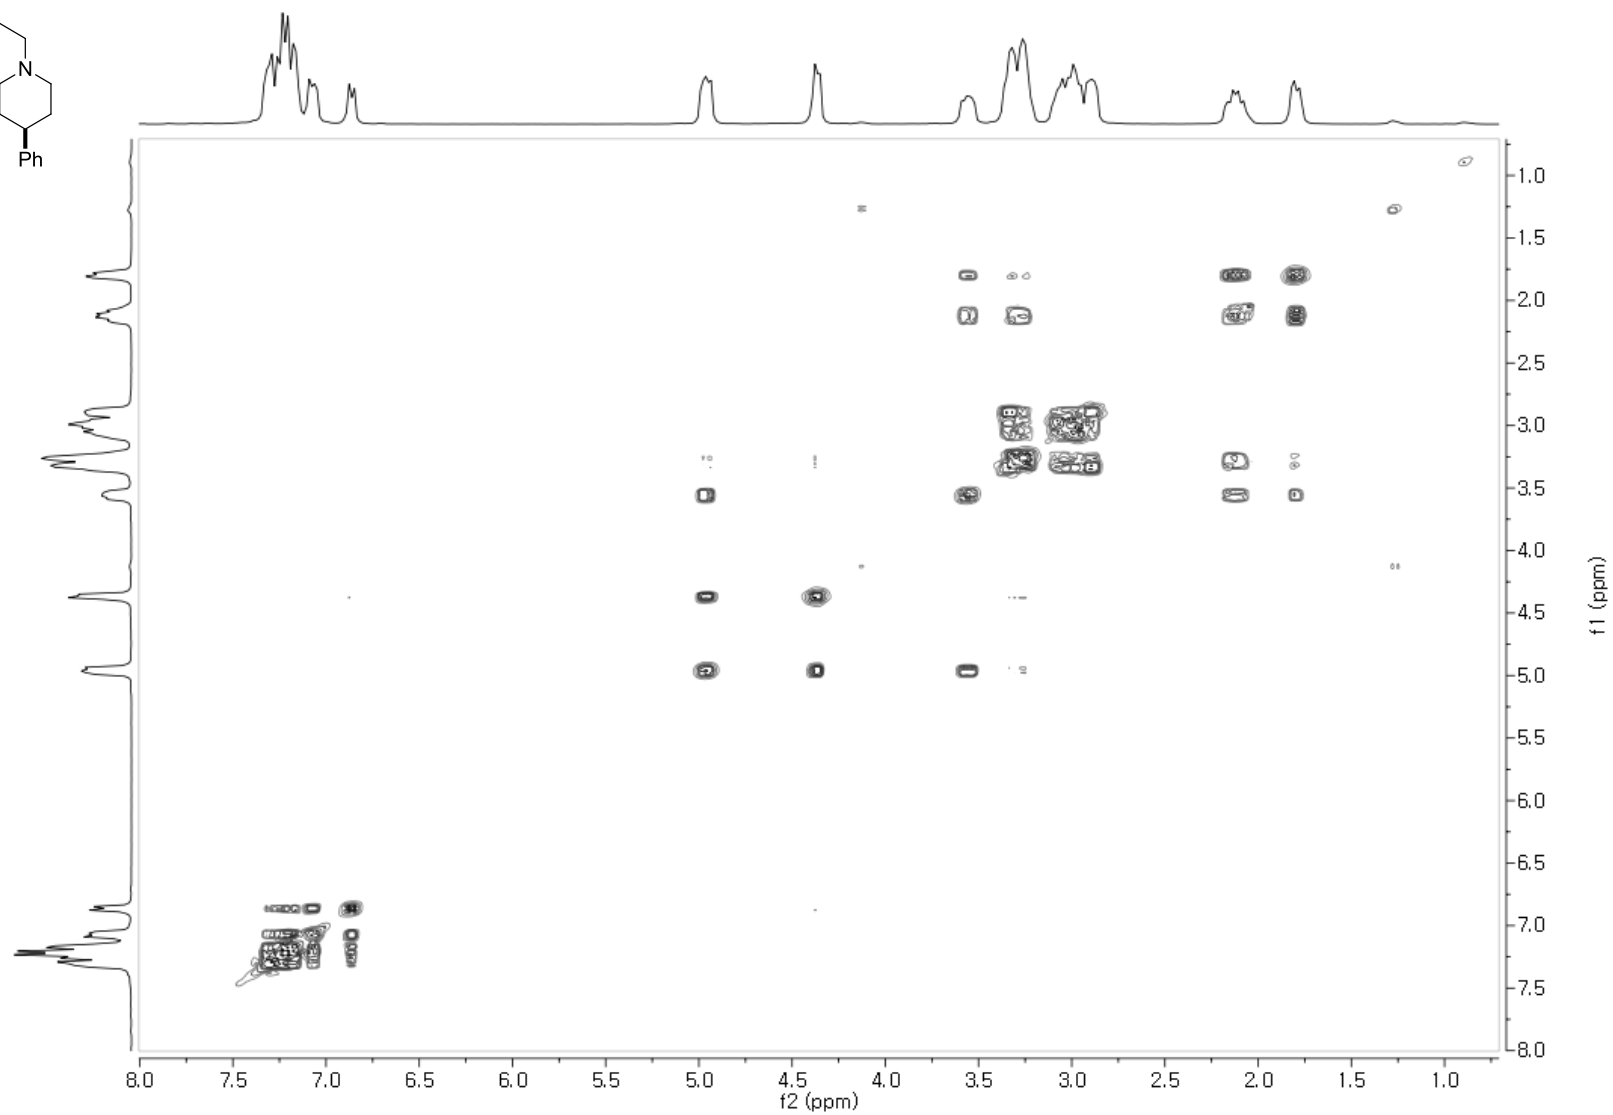

Noesy of **6k** in CDCl<sub>3</sub>

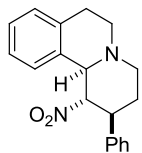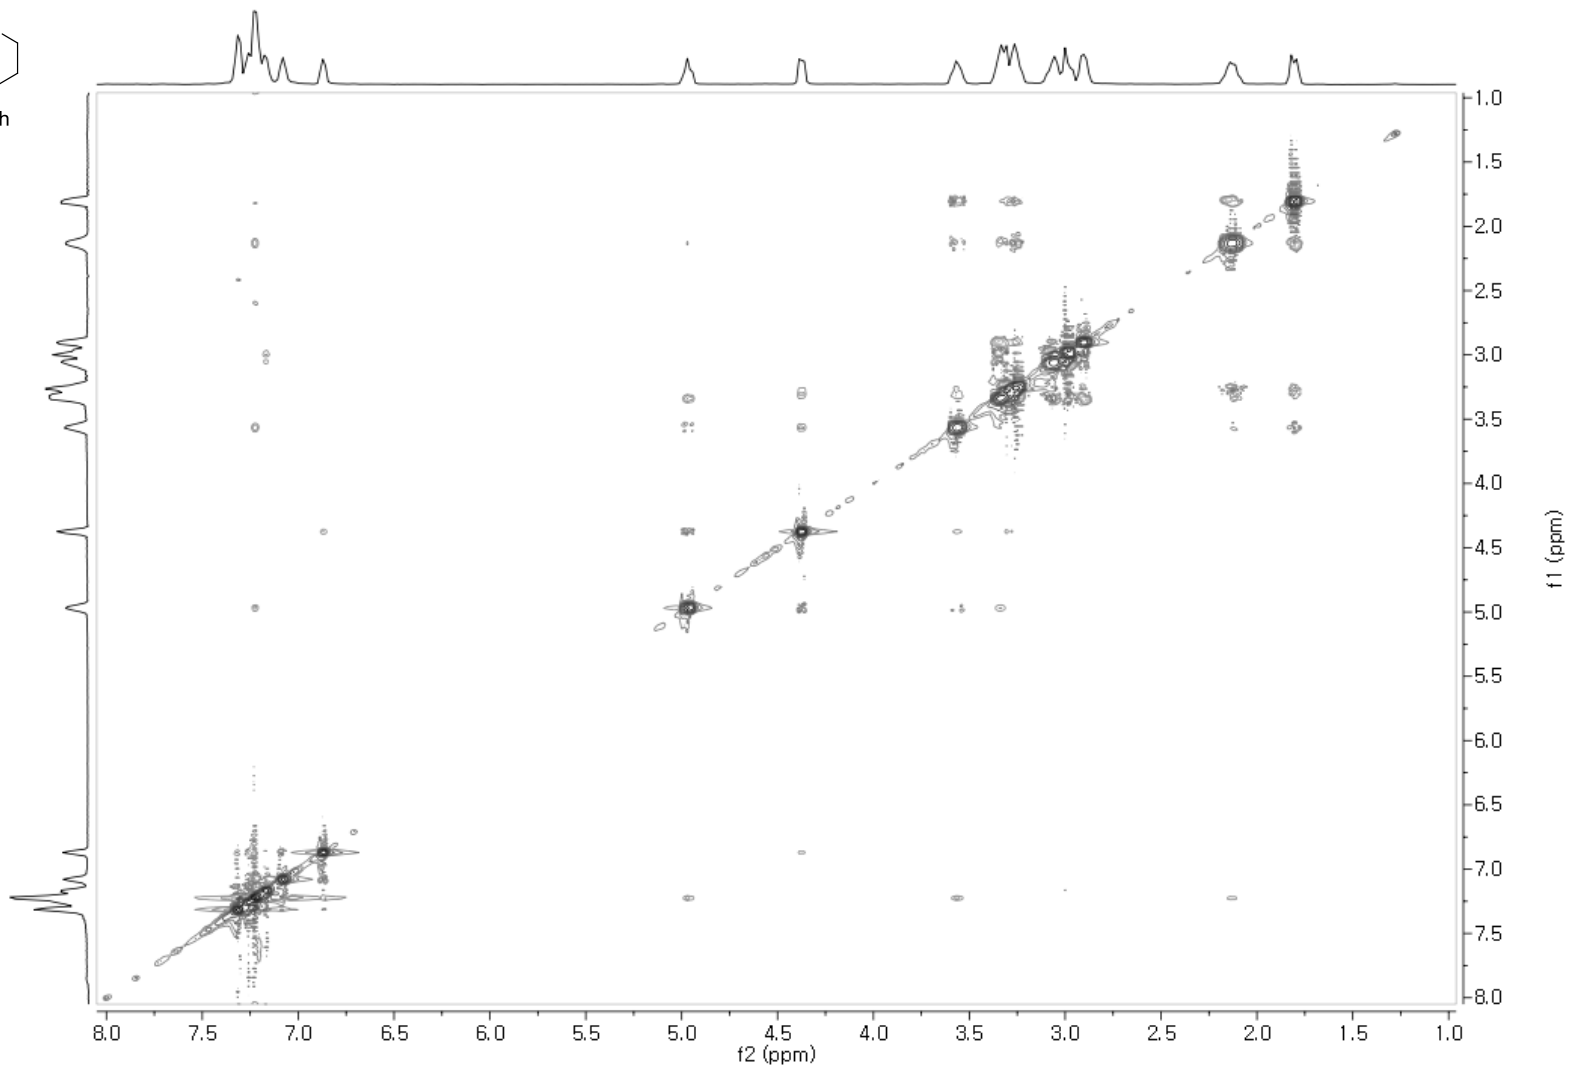

Gcosy of **8a** in CDCl<sub>3</sub>

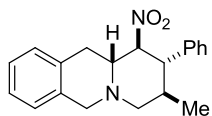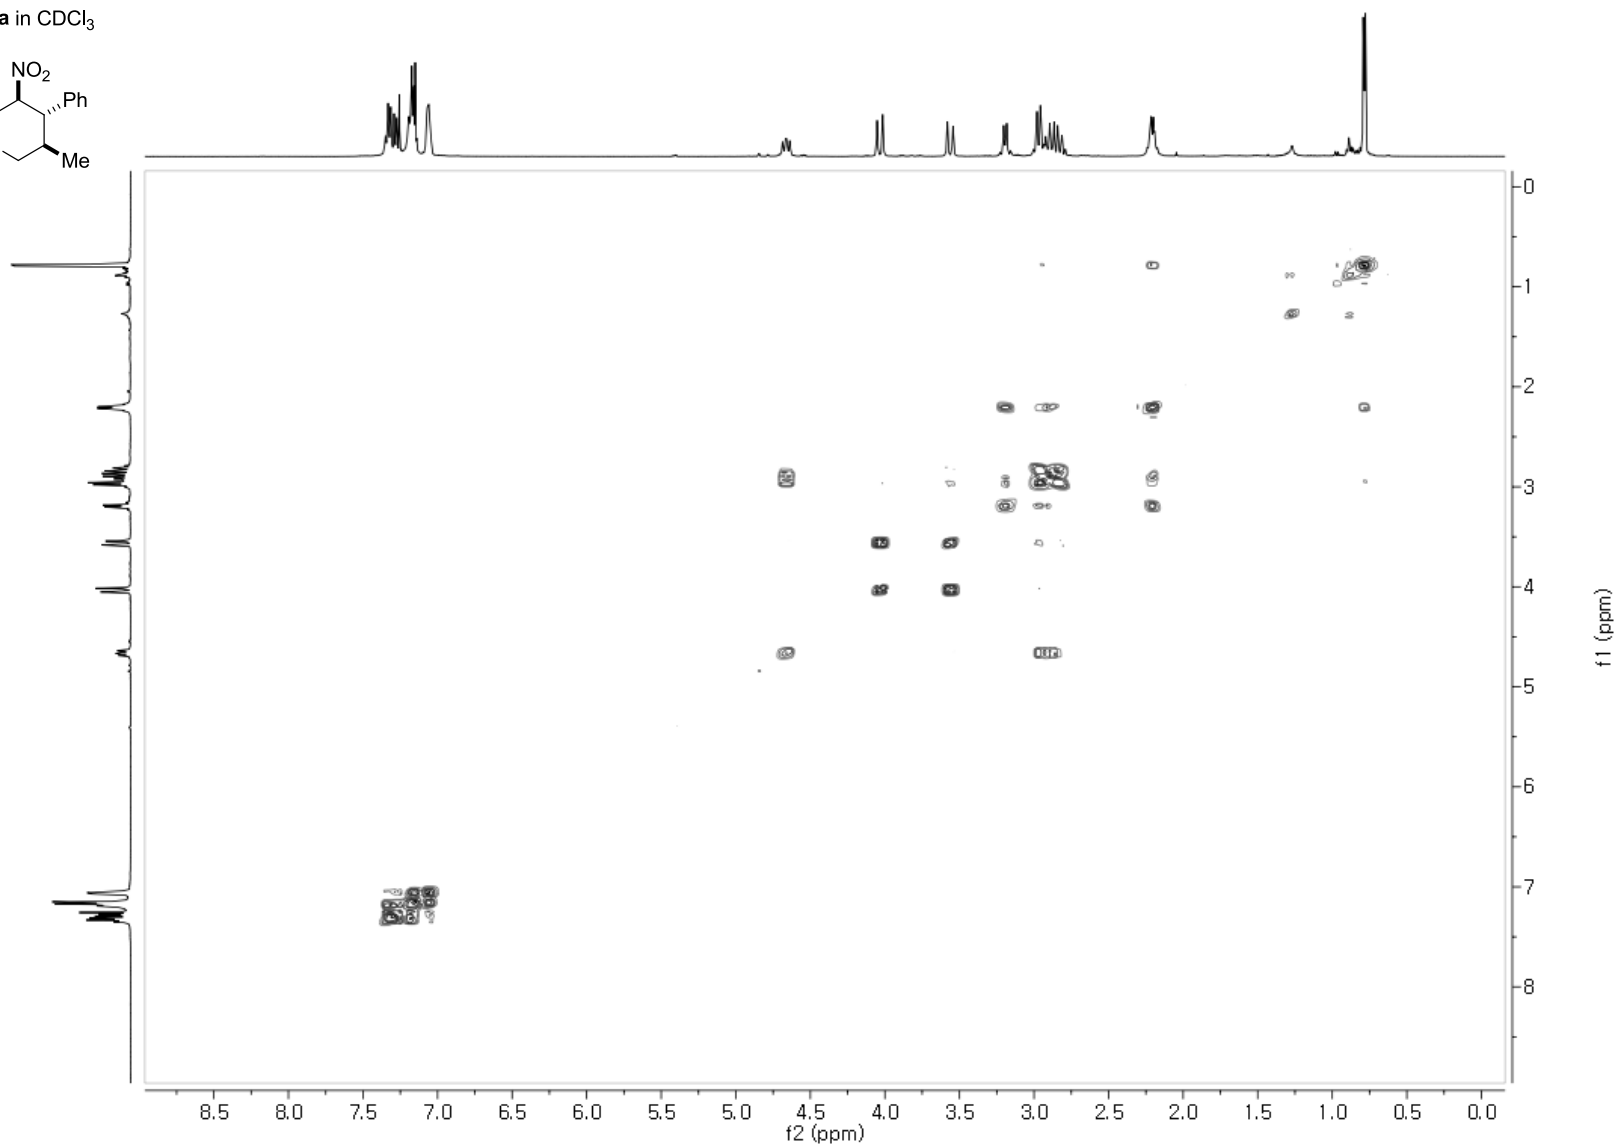

Noesy of **8a** in CDCl<sub>3</sub>

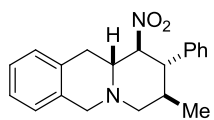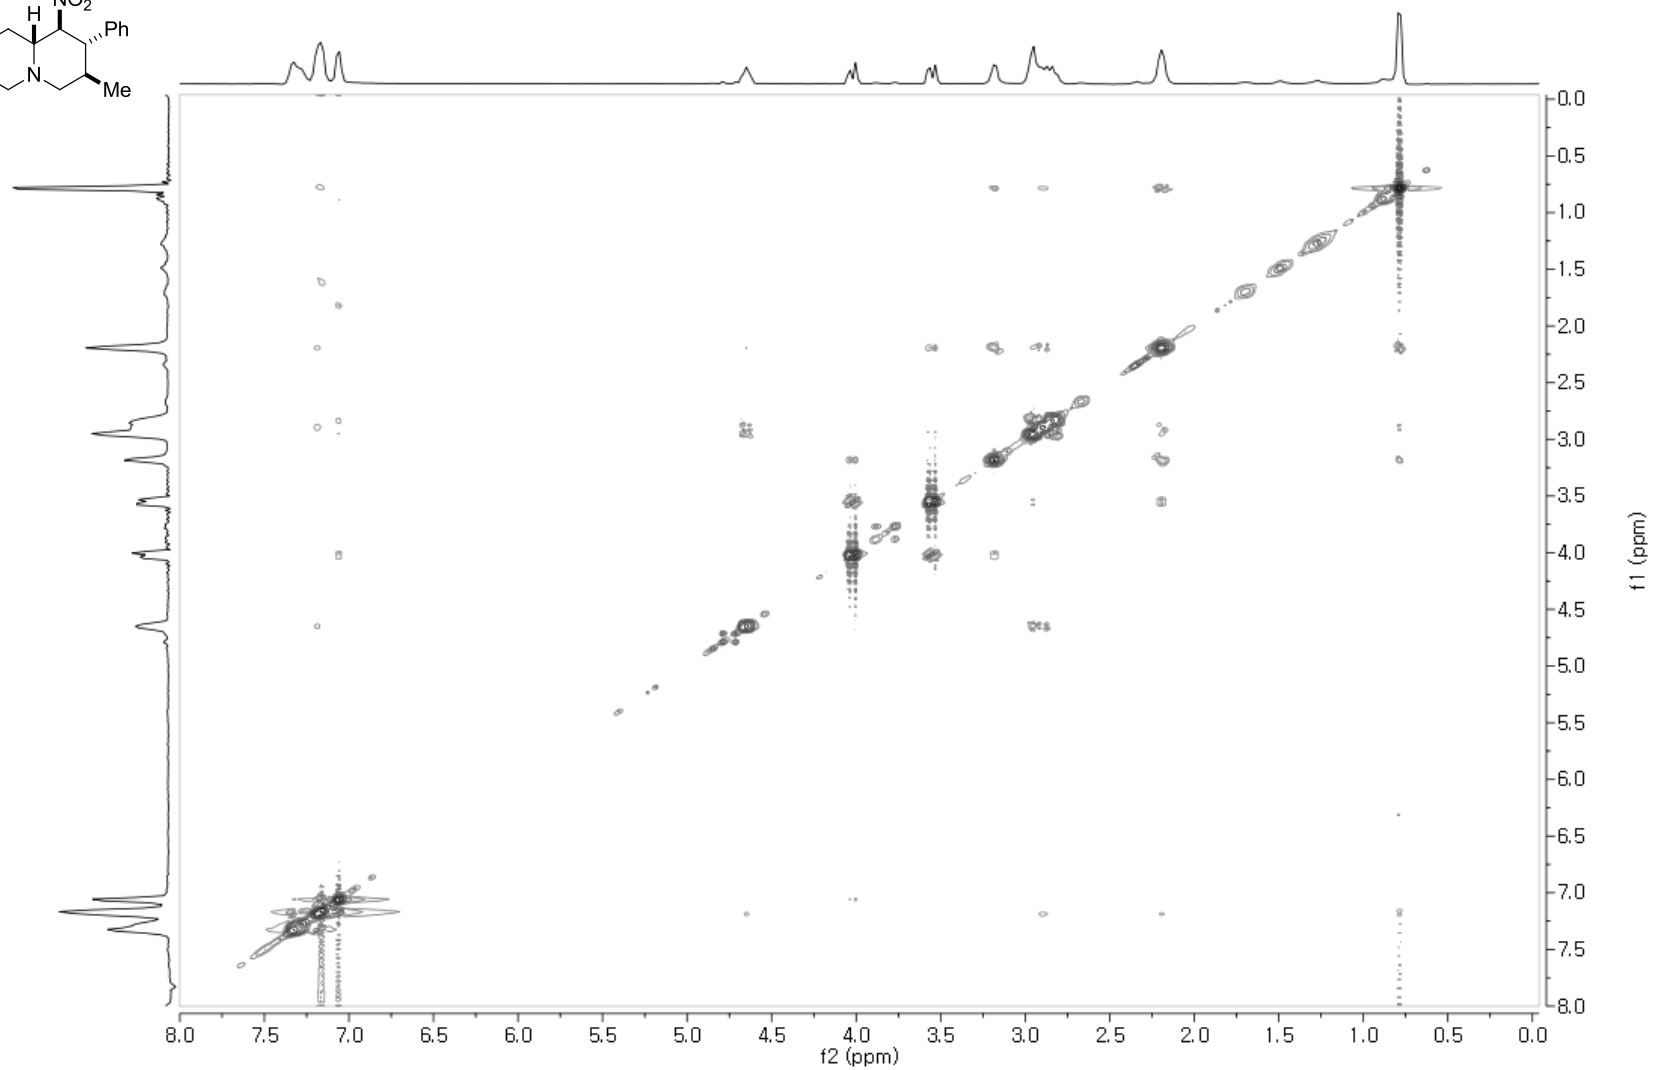

Gcosy of **9a** in CDCl<sub>3</sub>

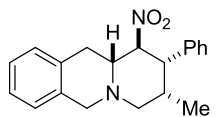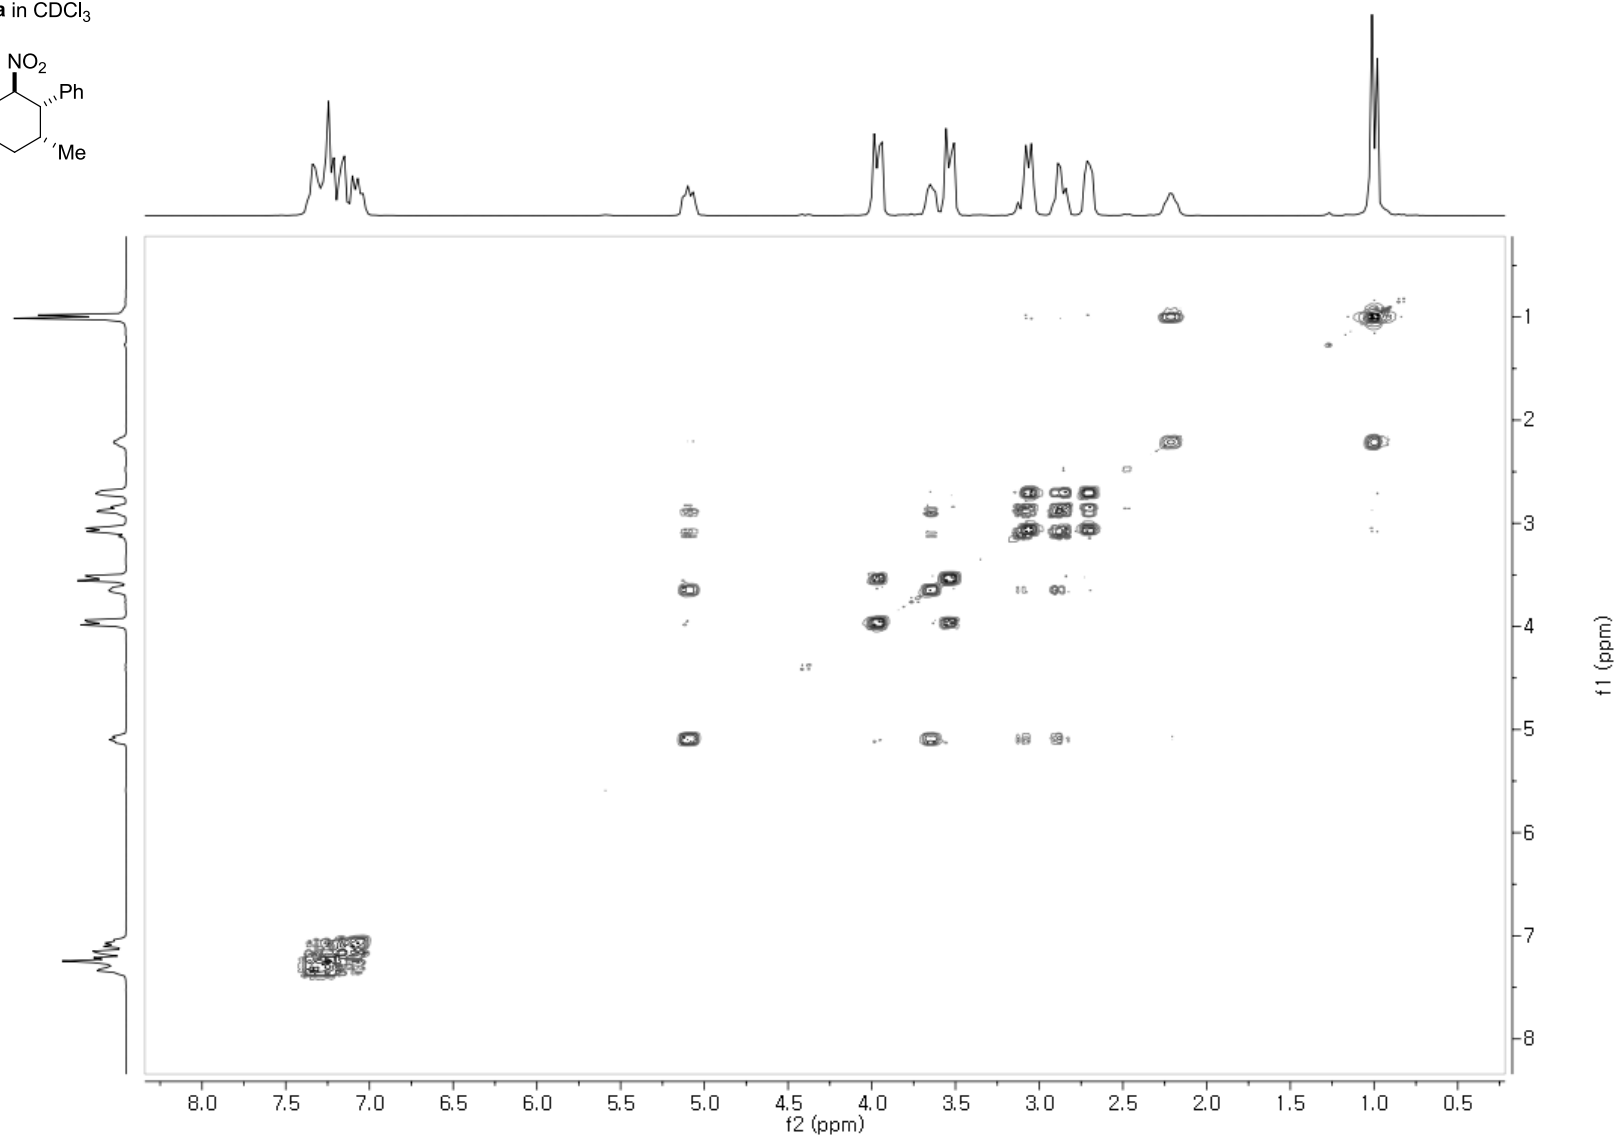



Noesy of **9a** in CDCl<sub>3</sub>

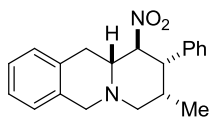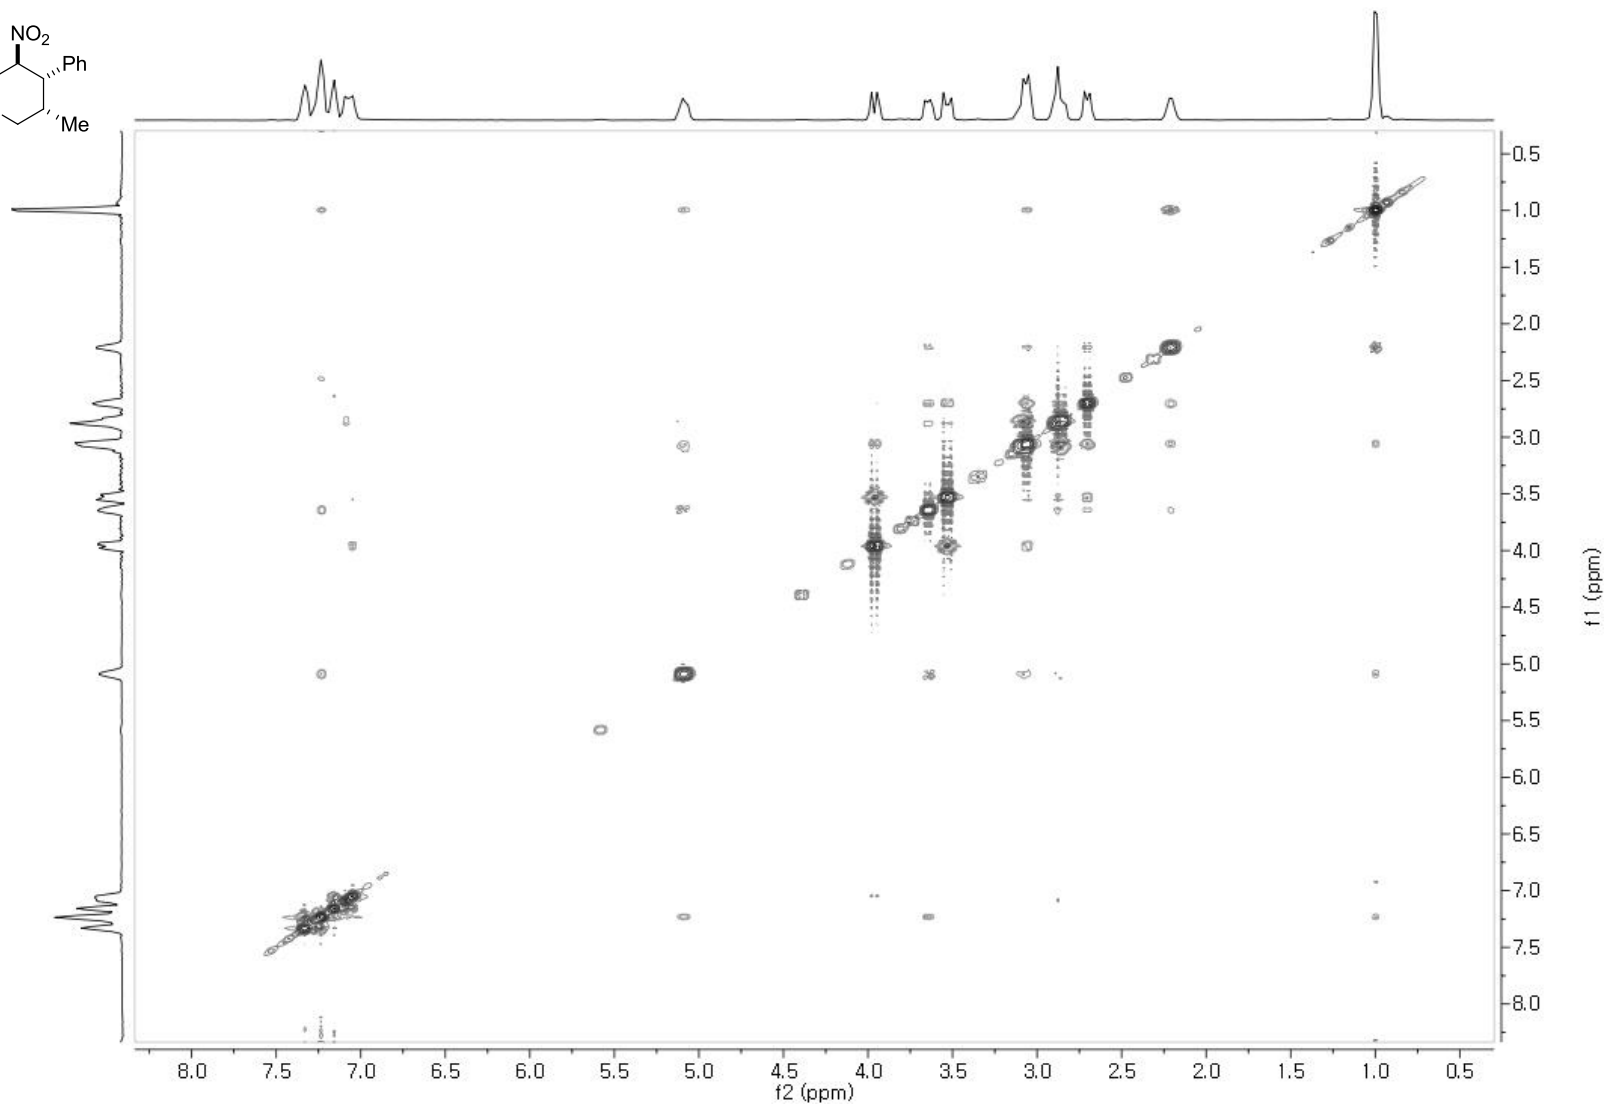

Gcosy of **8k** in CDCl<sub>3</sub>

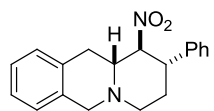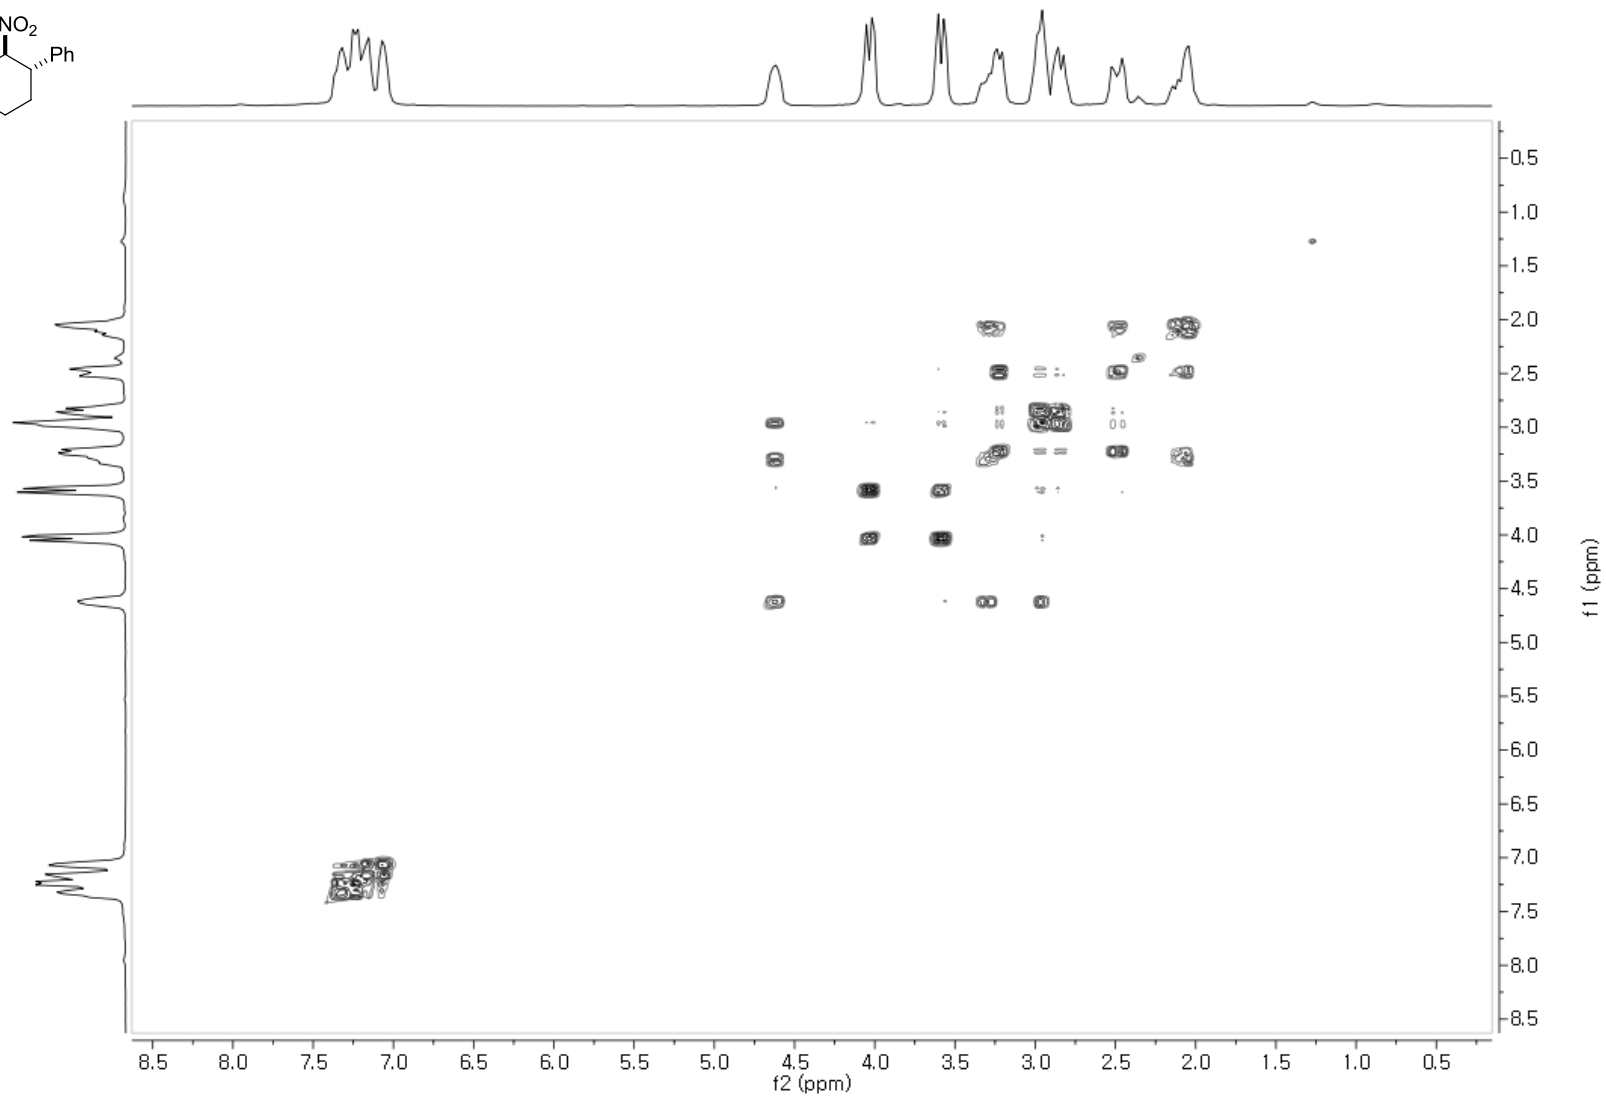

Noesy of **8k** in  $\text{CDCl}_3$

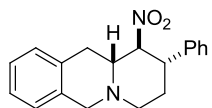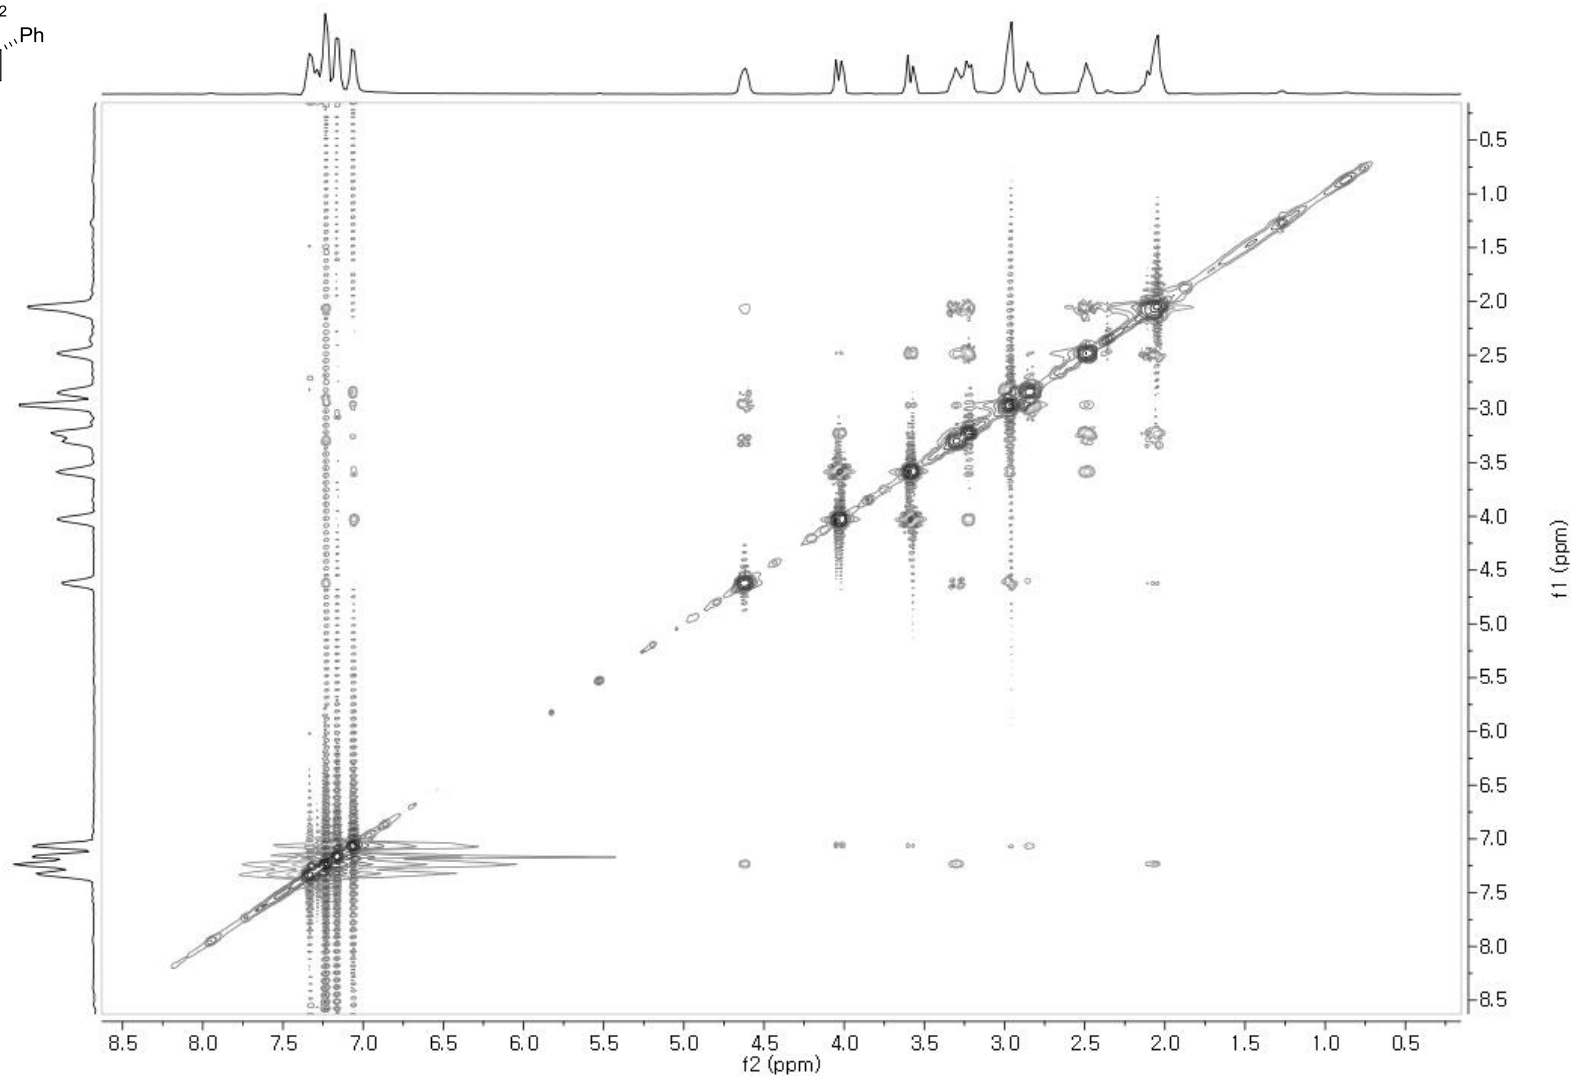

Gcosy of **11** in CDCl<sub>3</sub>

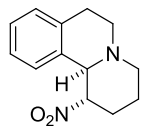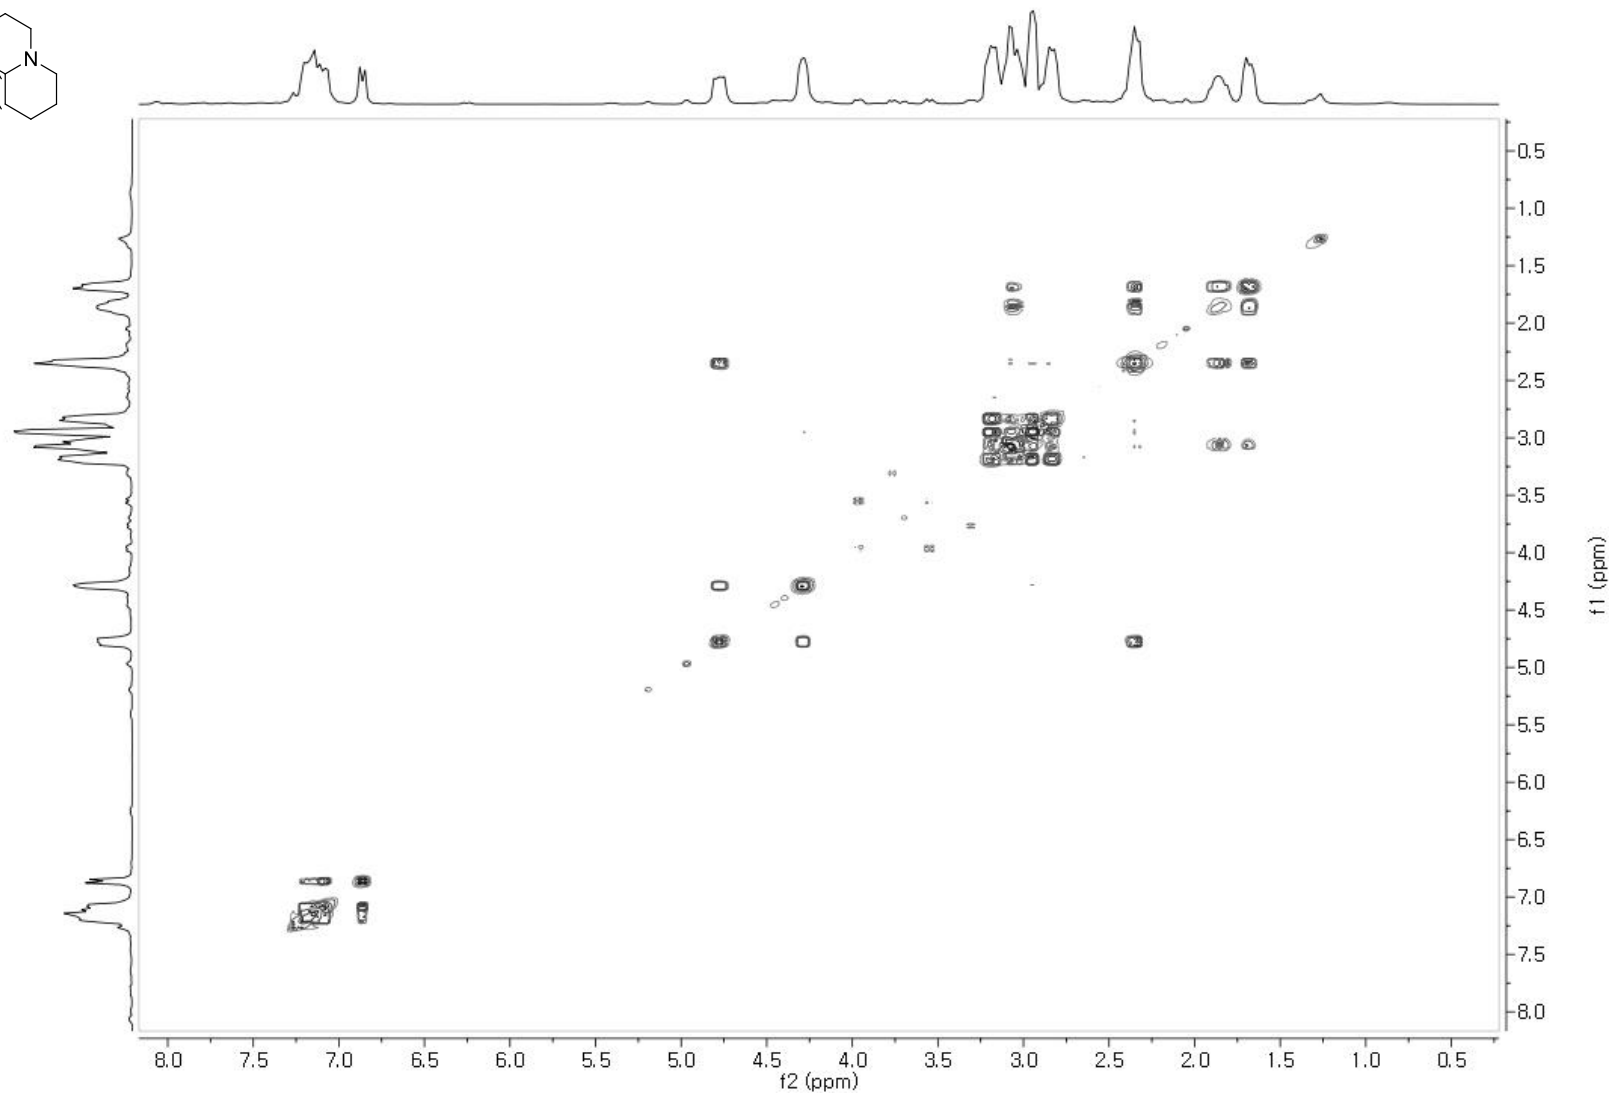

Noesy of **11** in CDCl<sub>3</sub>

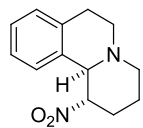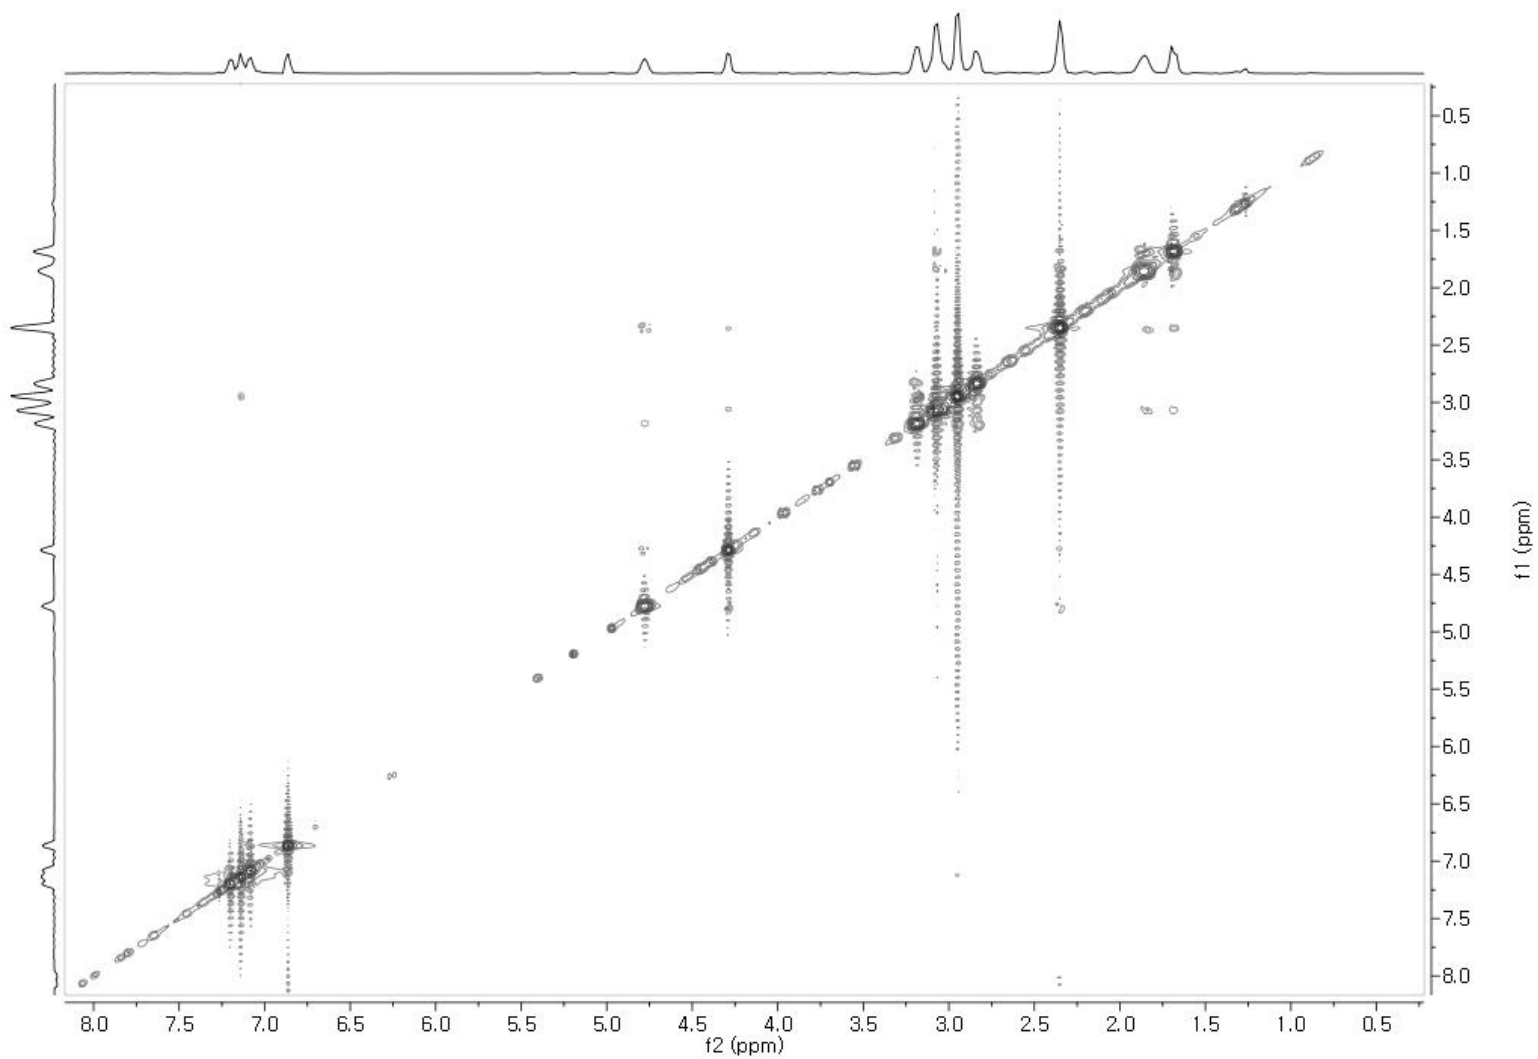

Gcosy of **12** in CDCl<sub>3</sub>

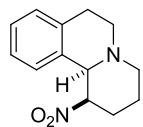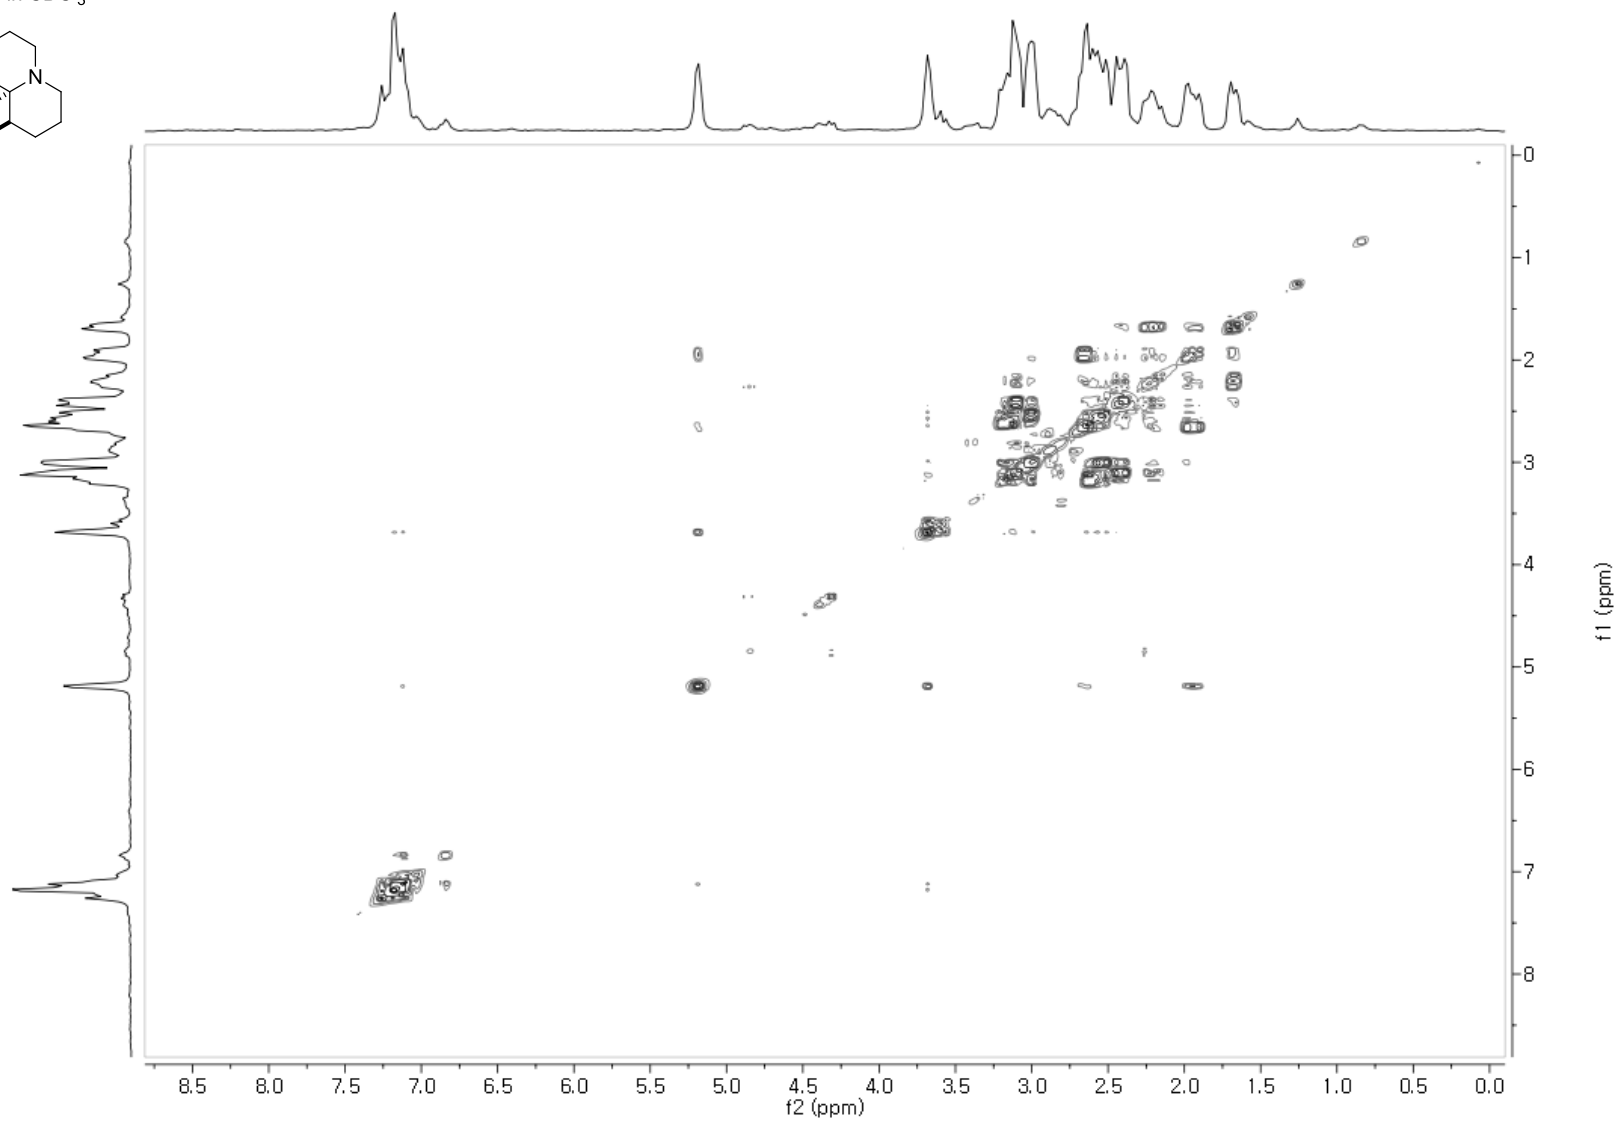

Noesy of **12** in CDCl<sub>3</sub>

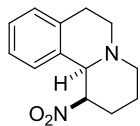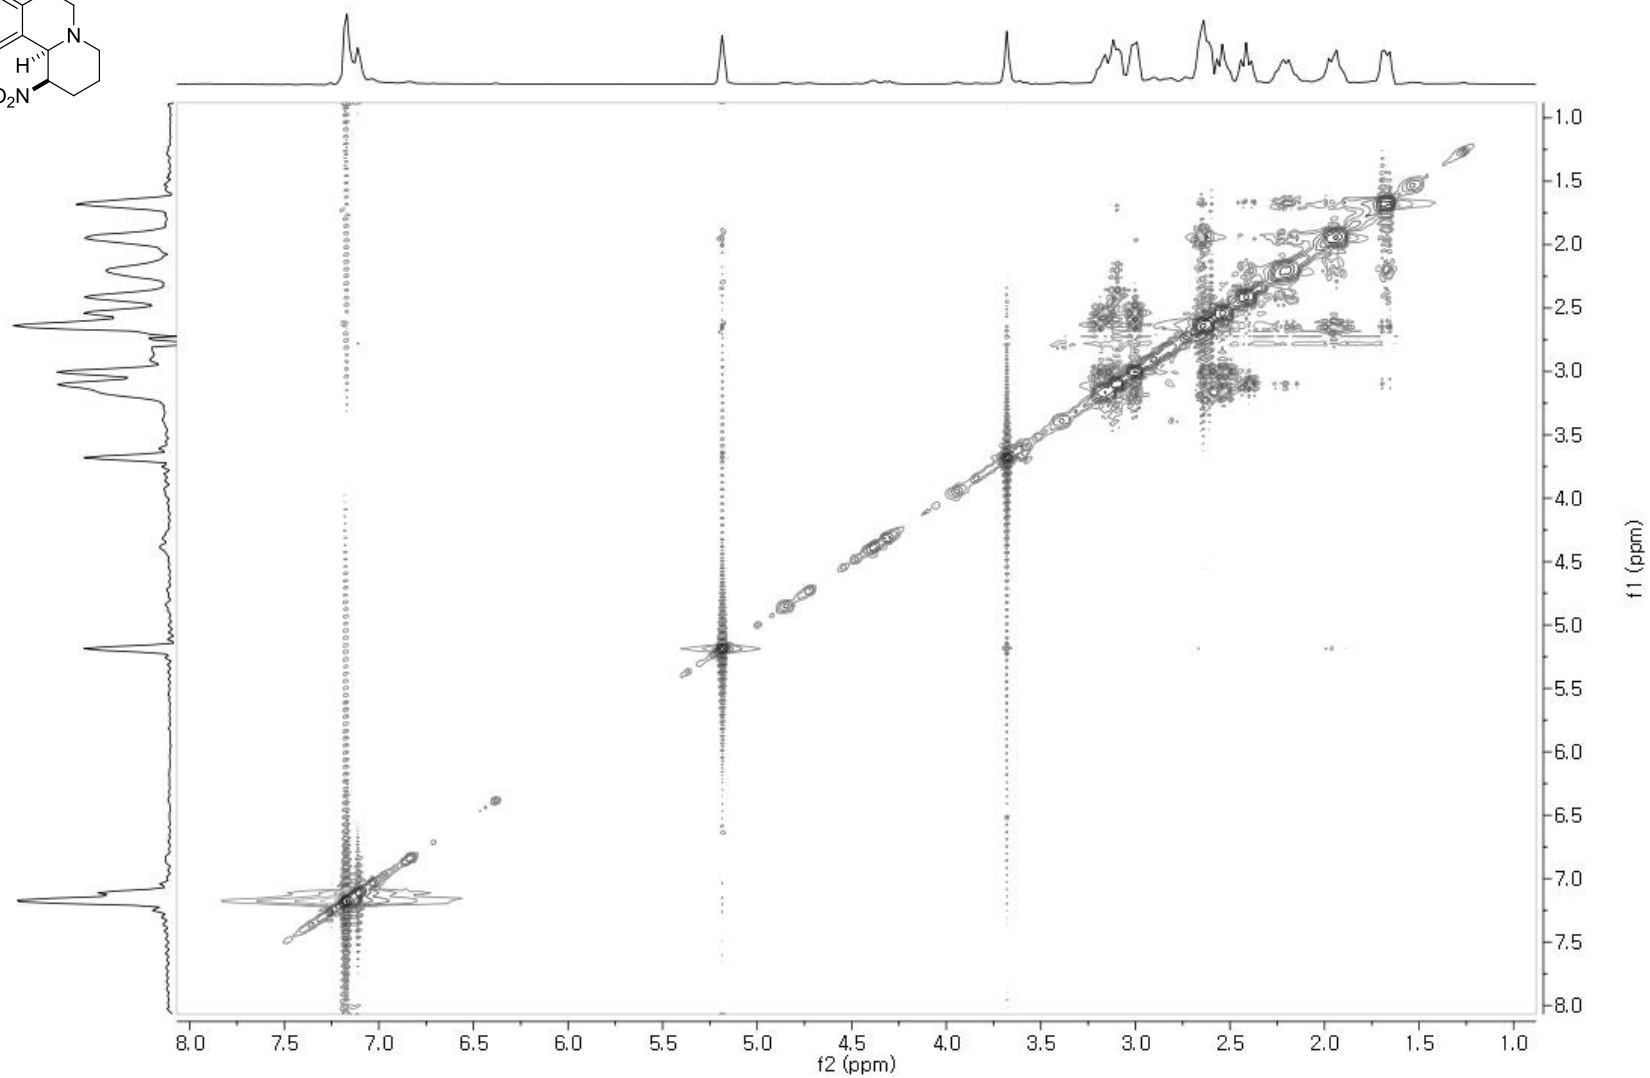

Gcosy of **13** in CDCl<sub>3</sub>

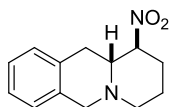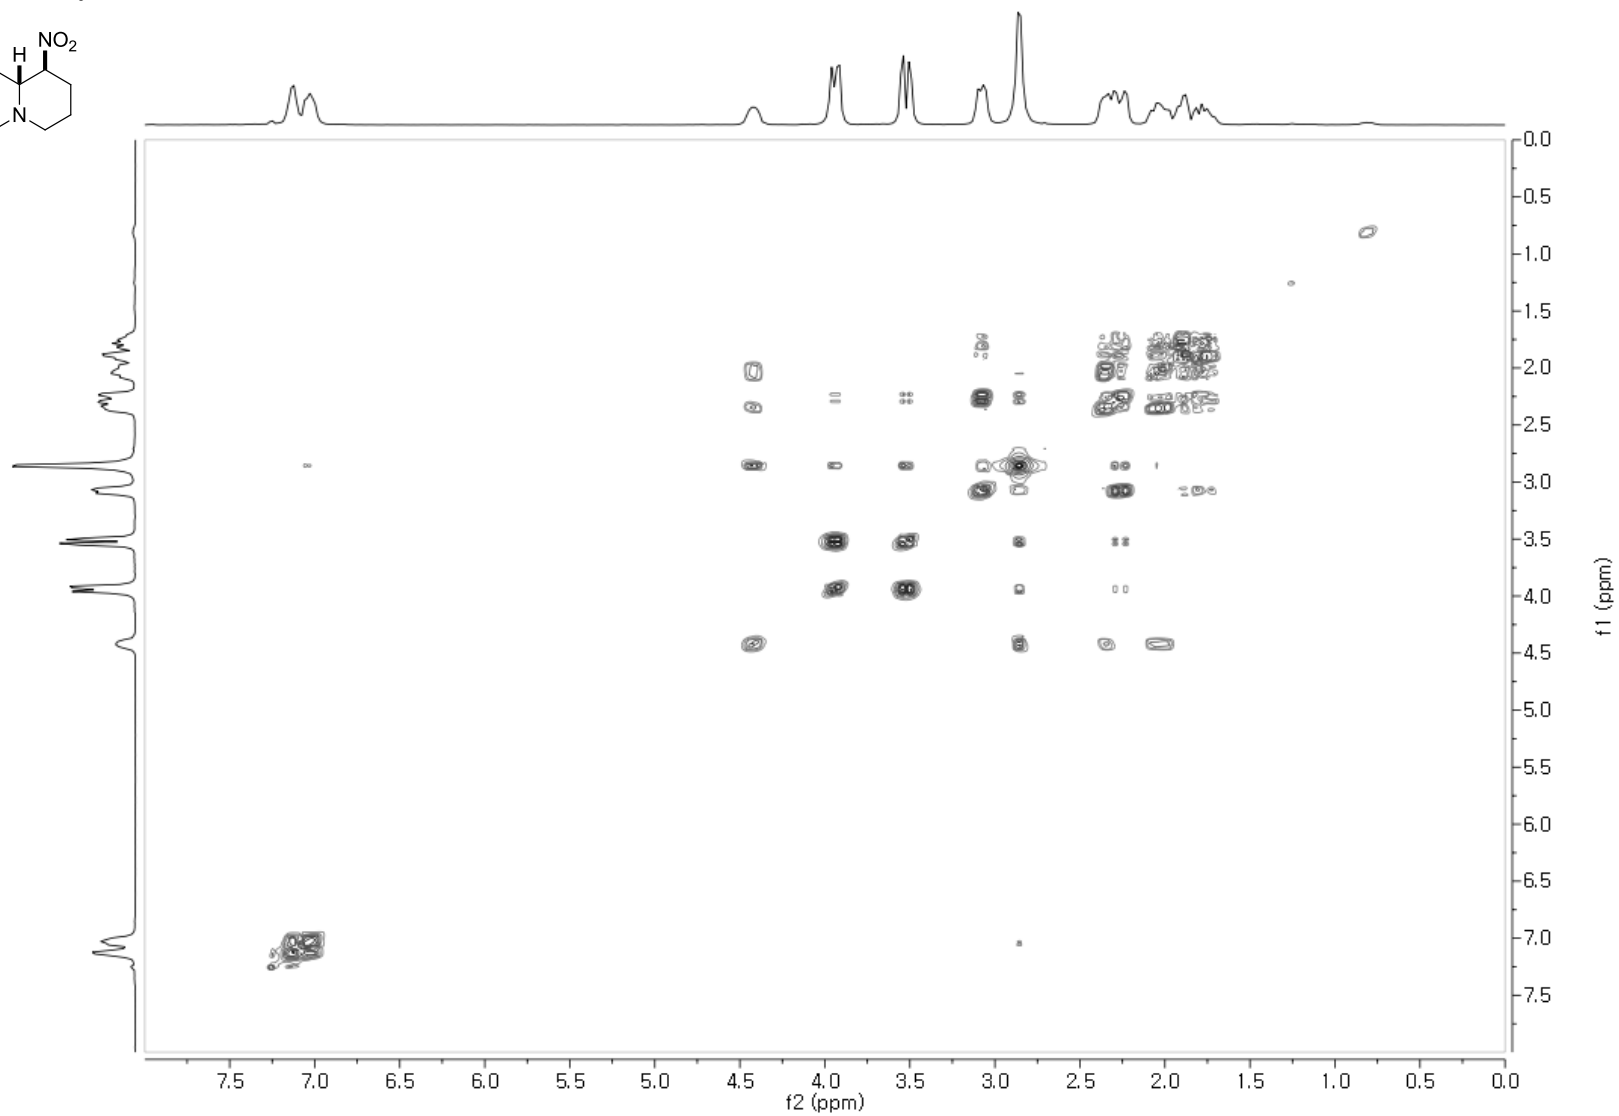



Noesy of **13** in CDCl<sub>3</sub>

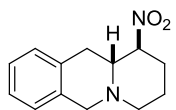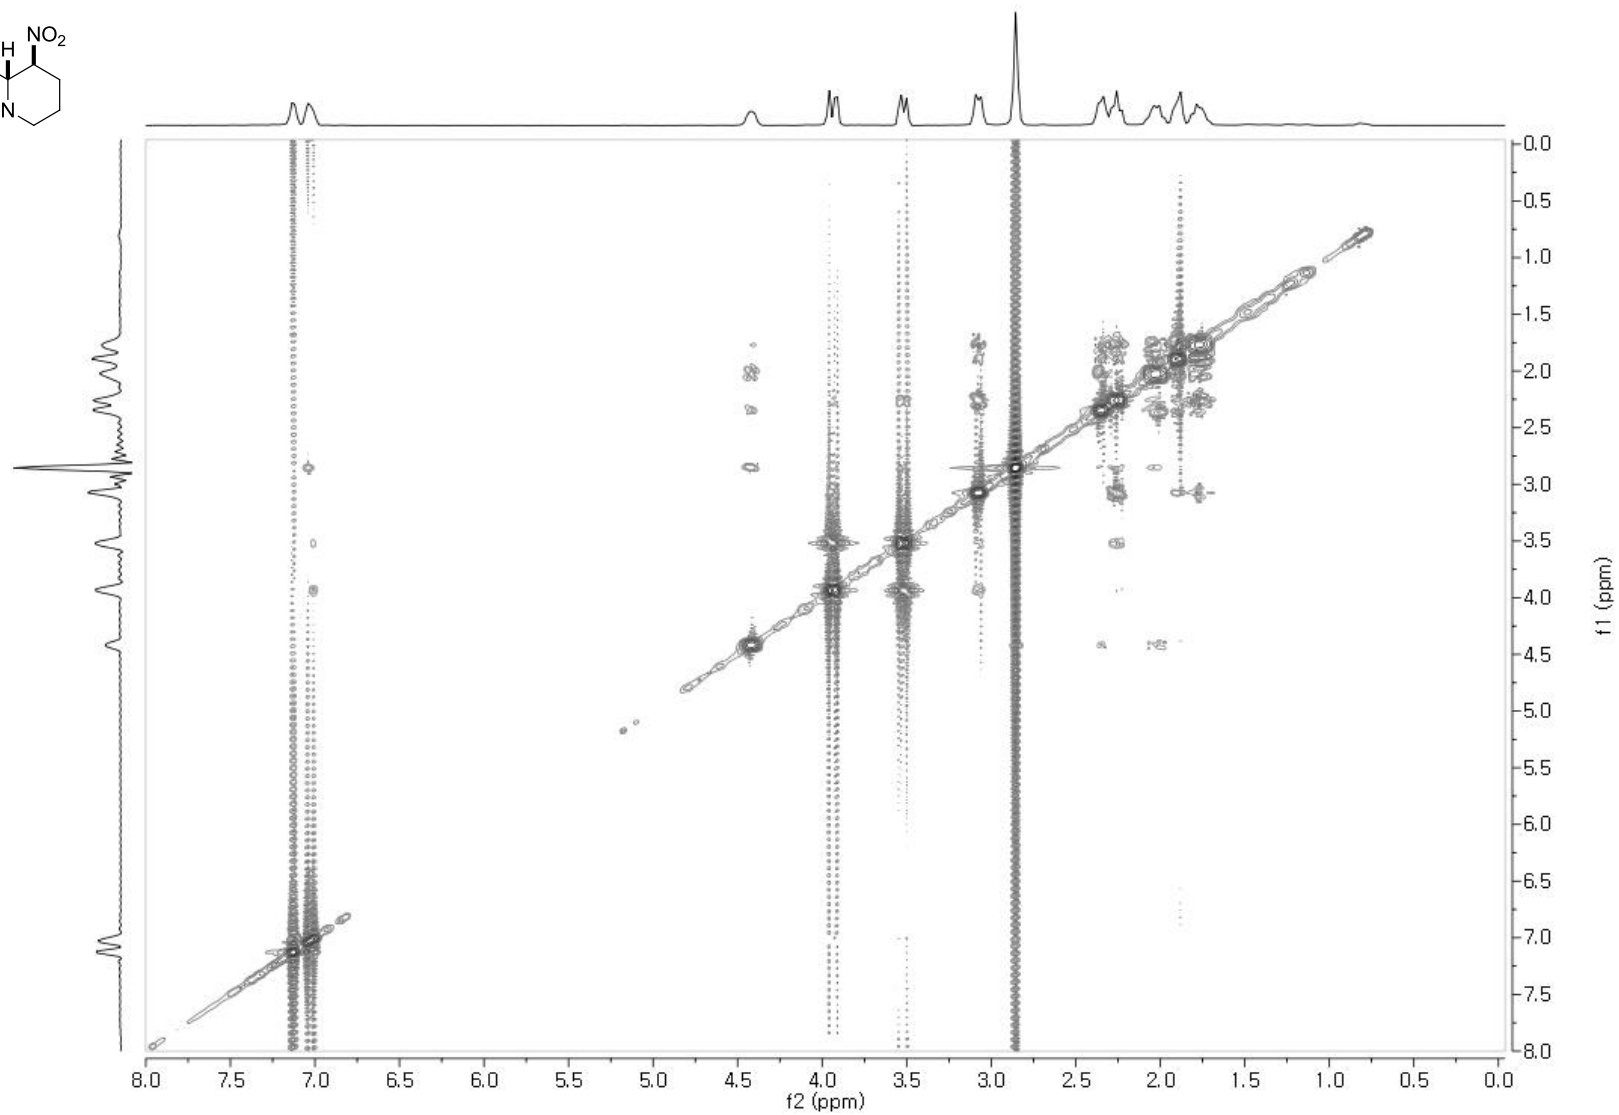

Gcosy of **17** in CDCl<sub>3</sub>

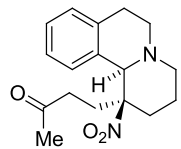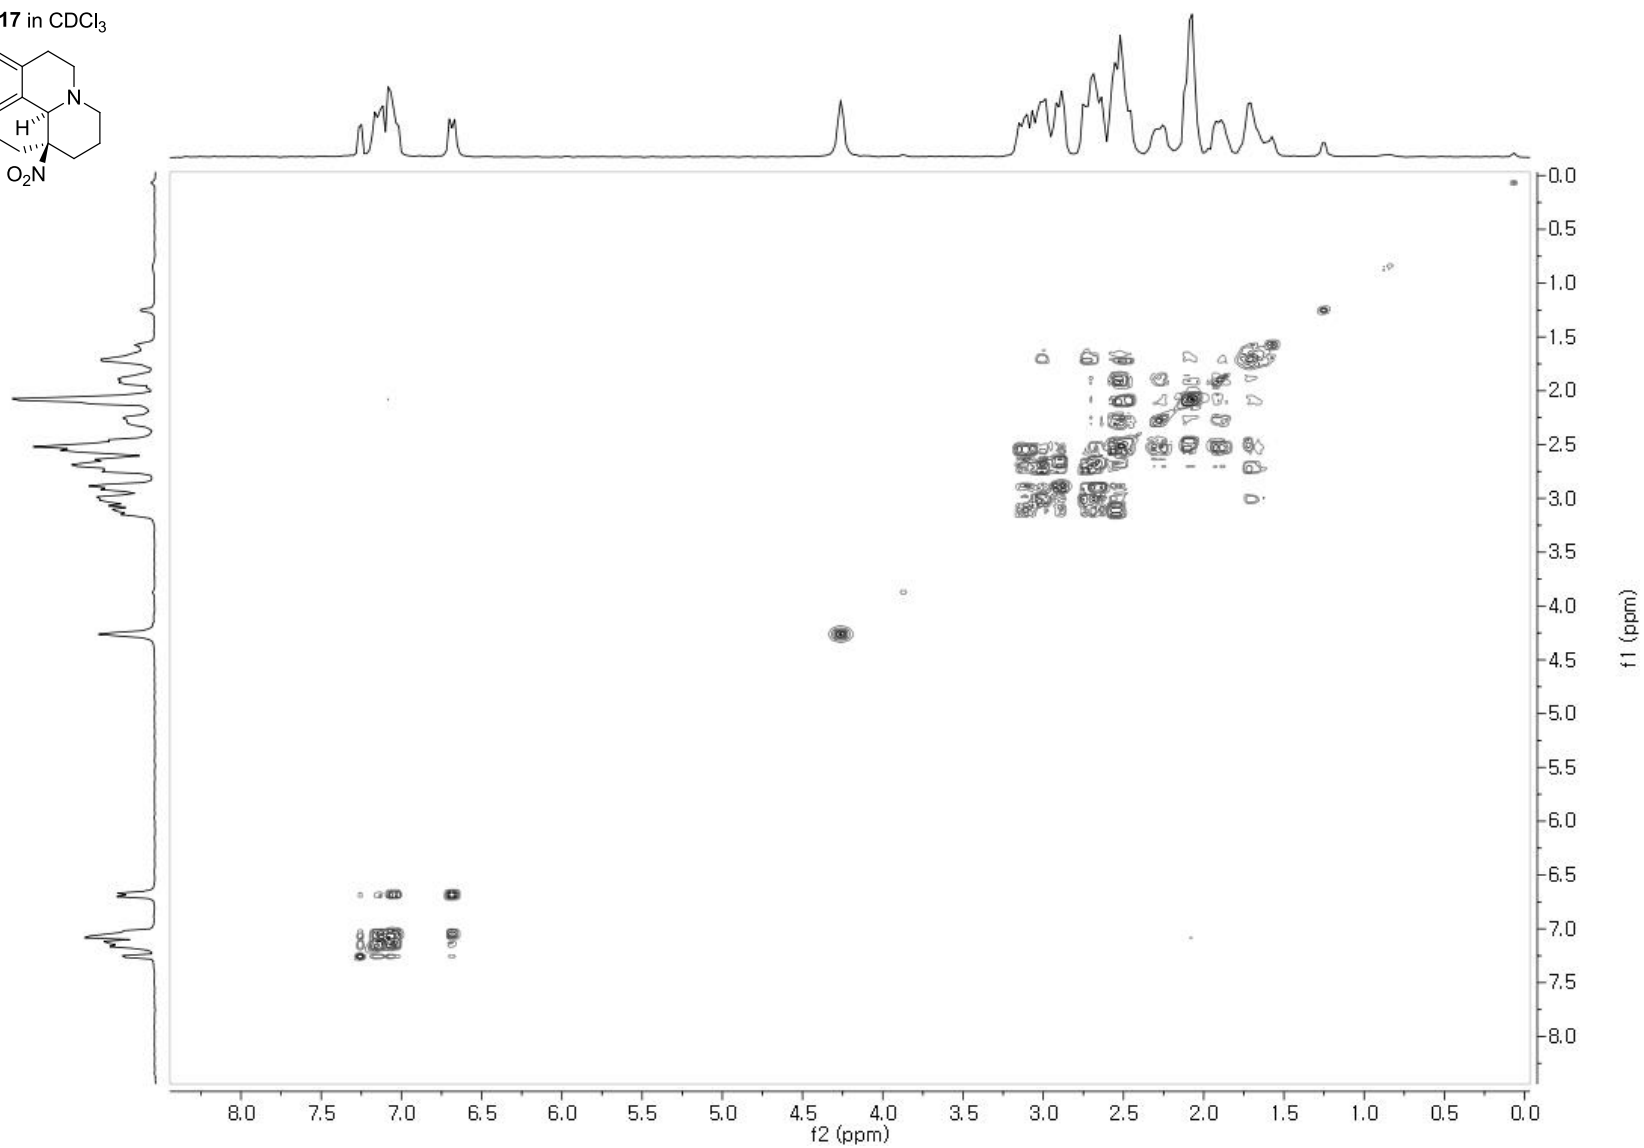

Noesy of 17 in CDCl<sub>3</sub>

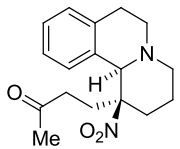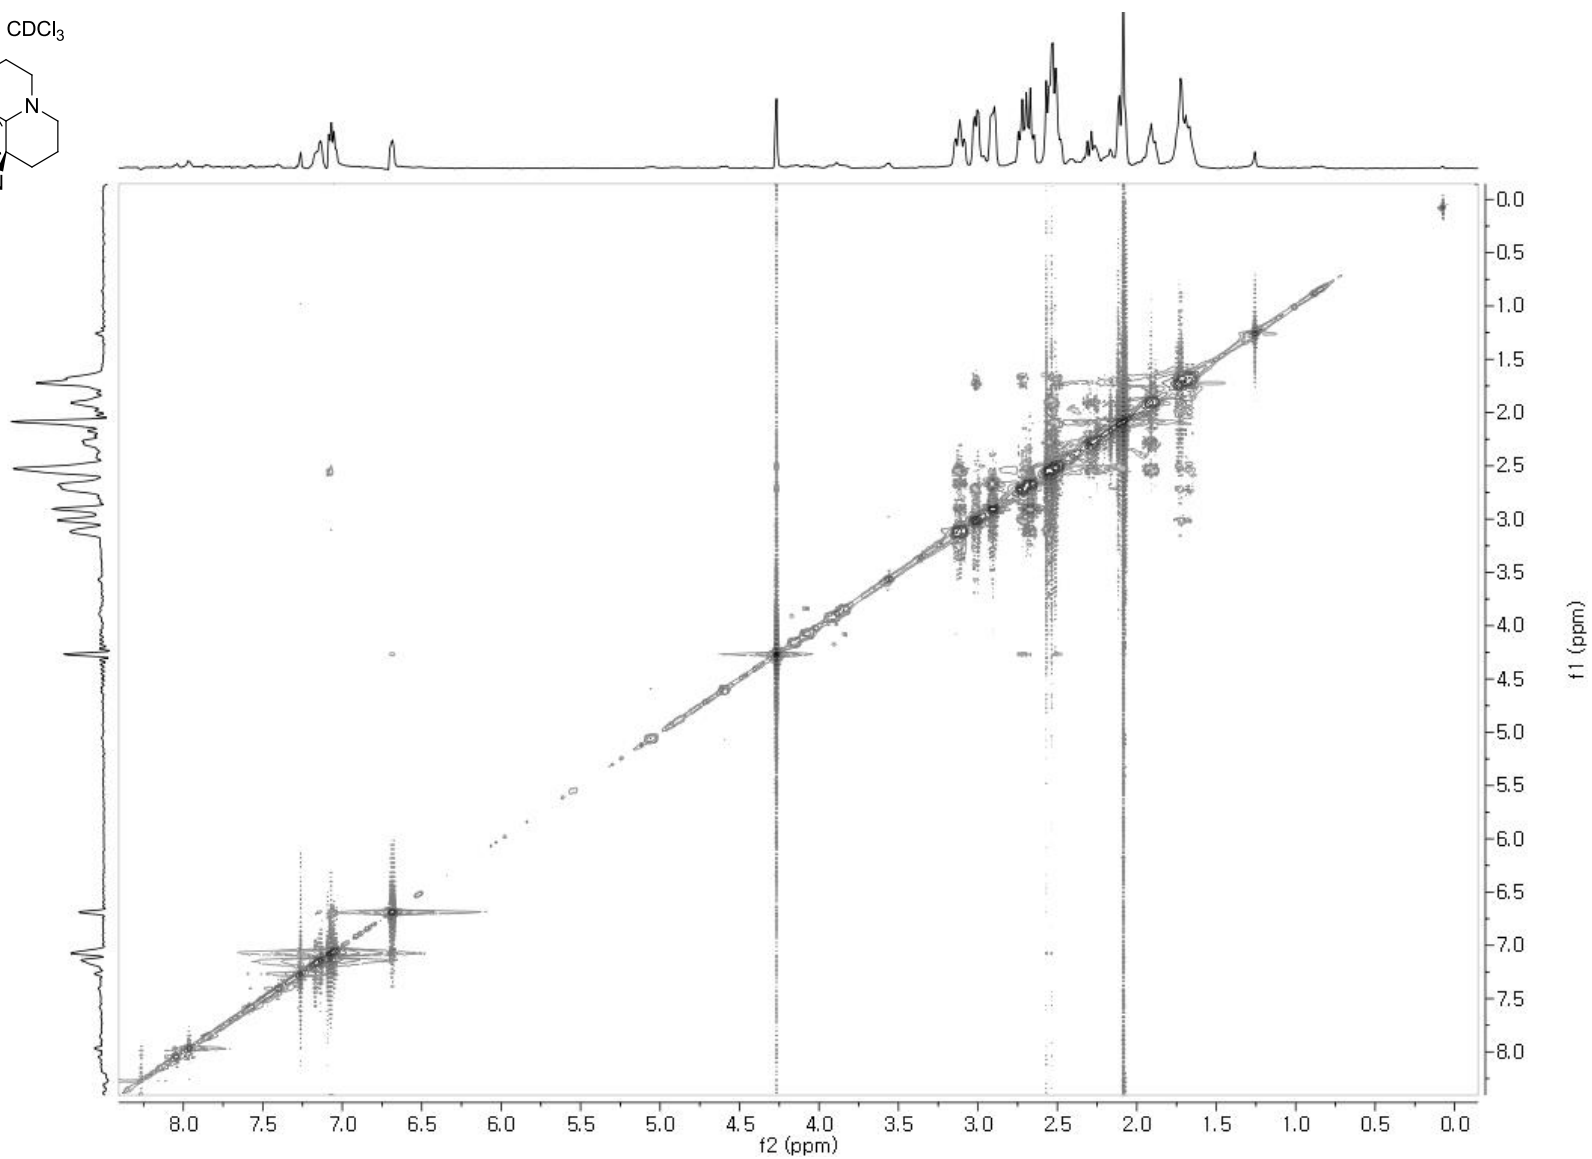

Gcosy of **19** in CDCl<sub>3</sub>

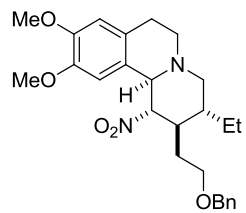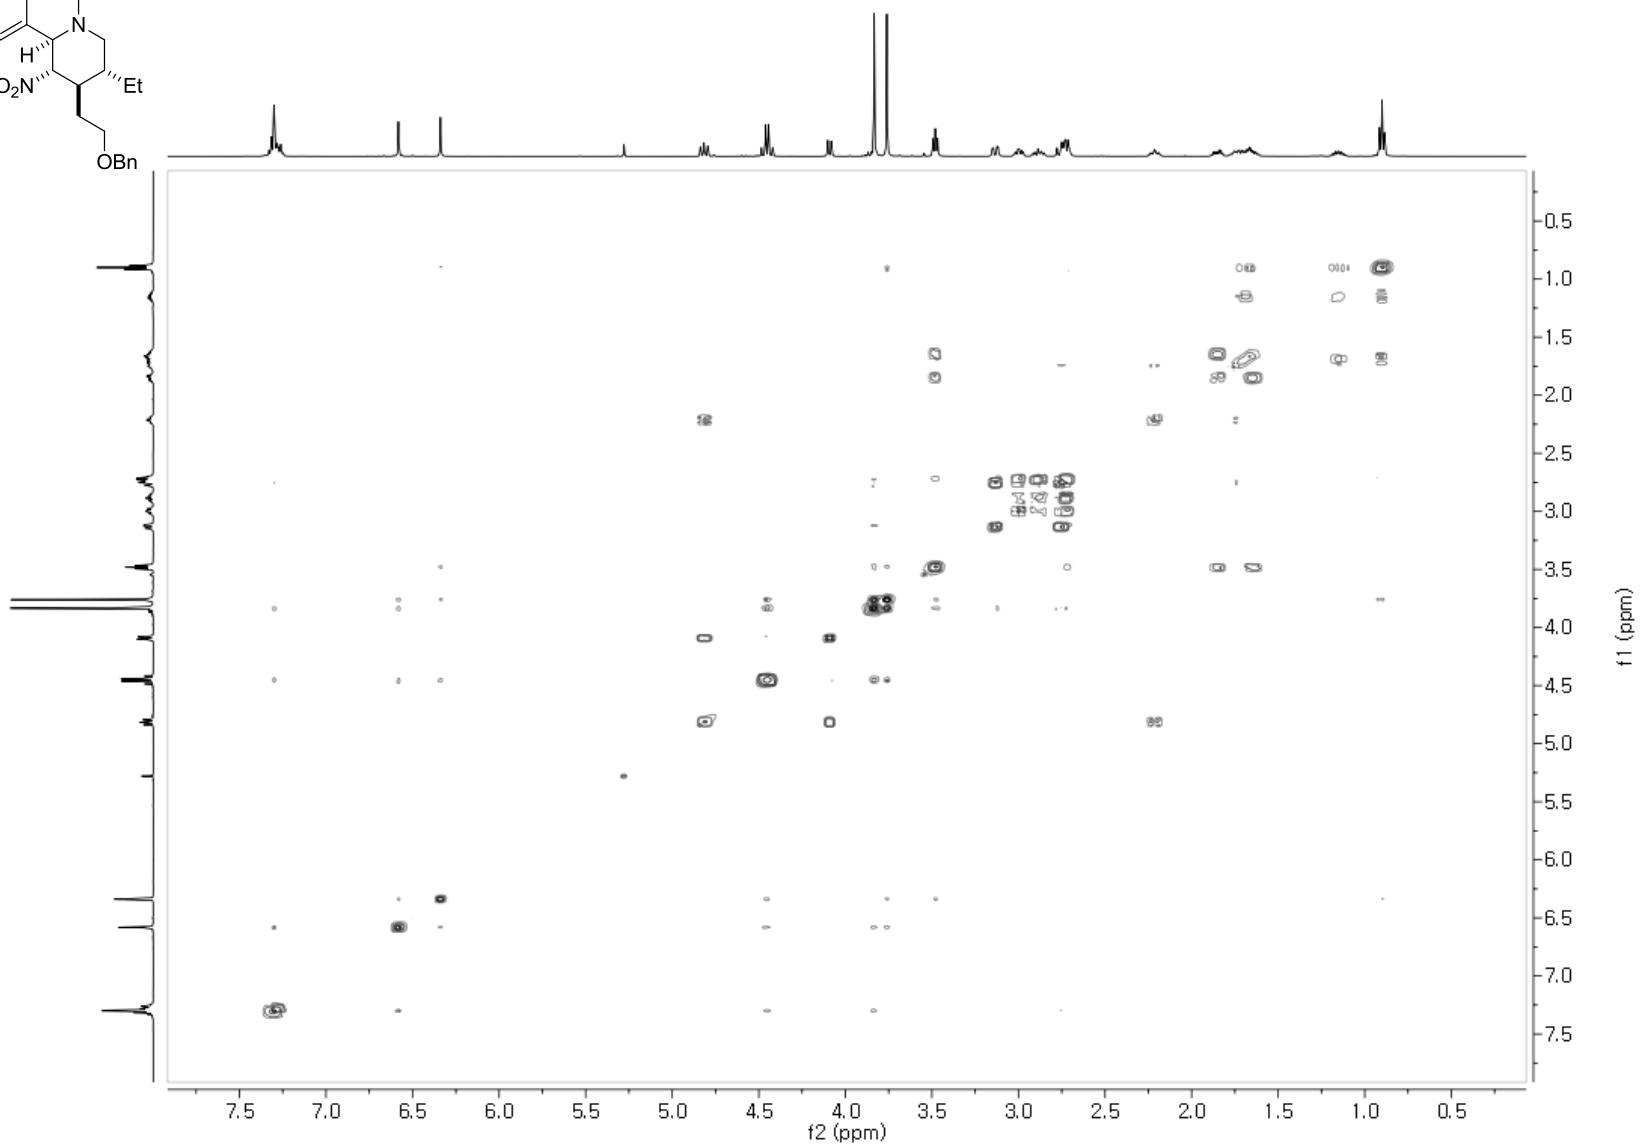

Noesy of **19** in CDCl<sub>3</sub>

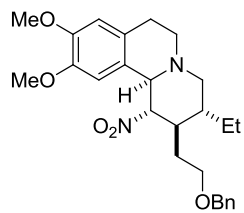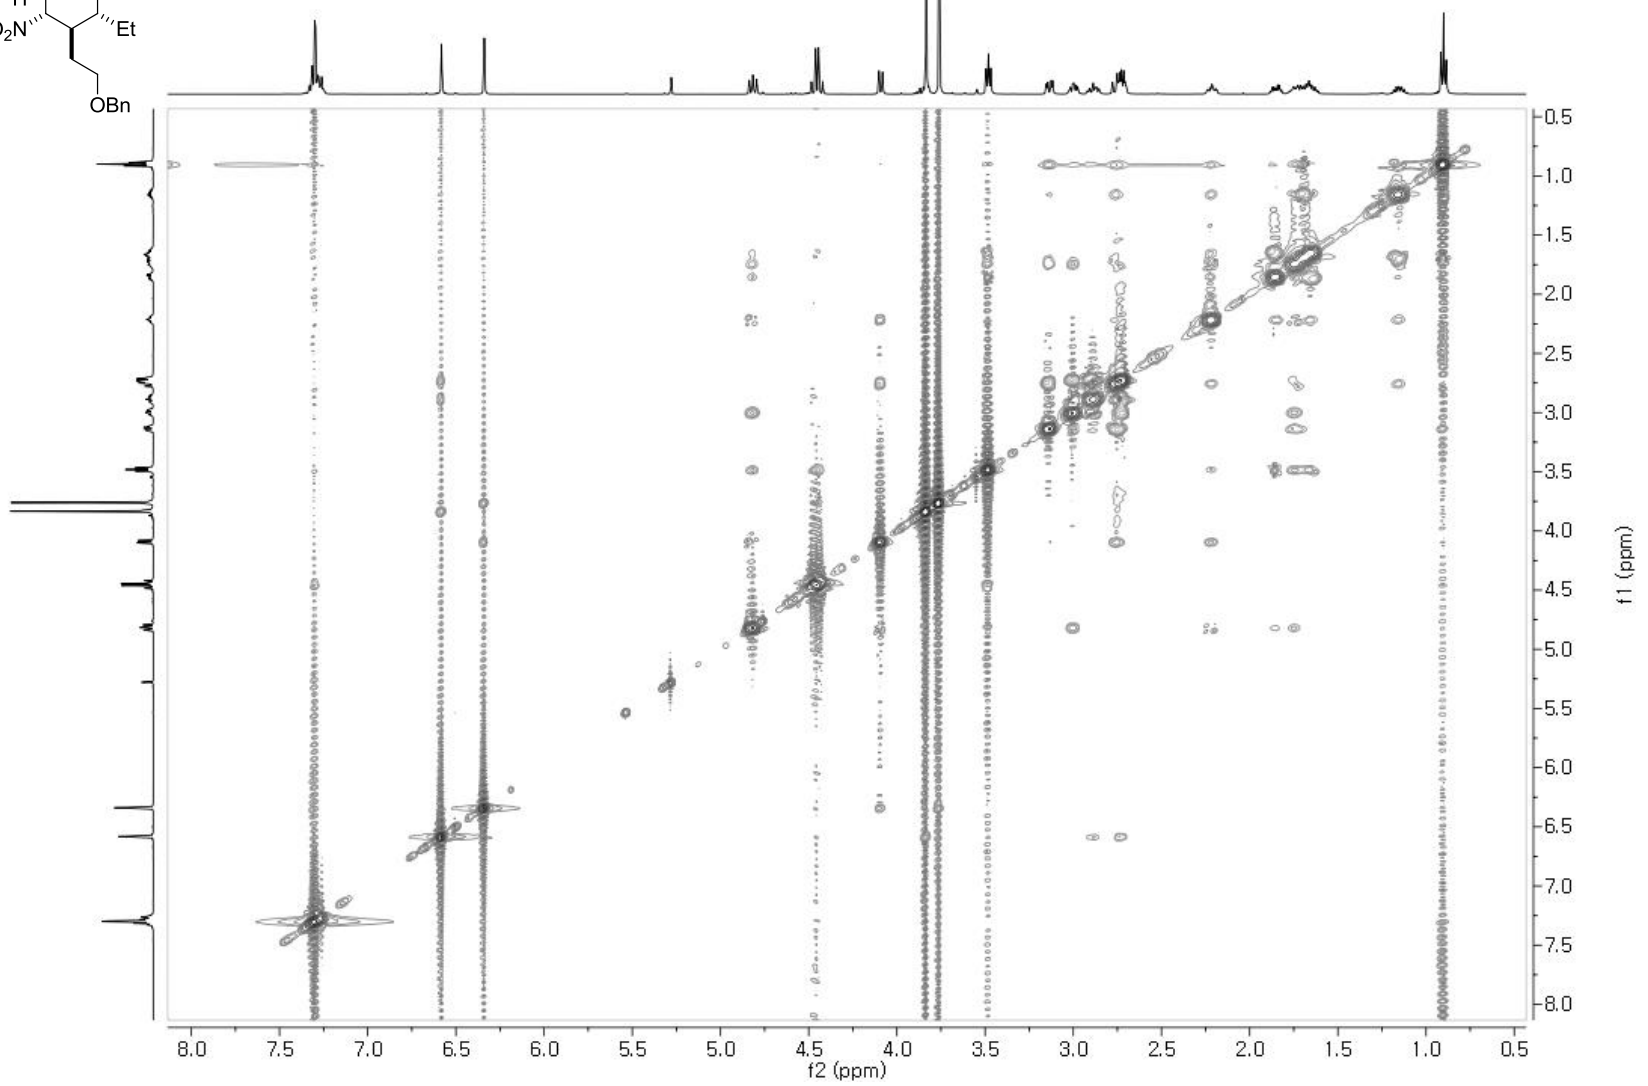

Gcosy of **19'** in CDCl<sub>3</sub>

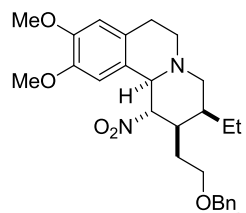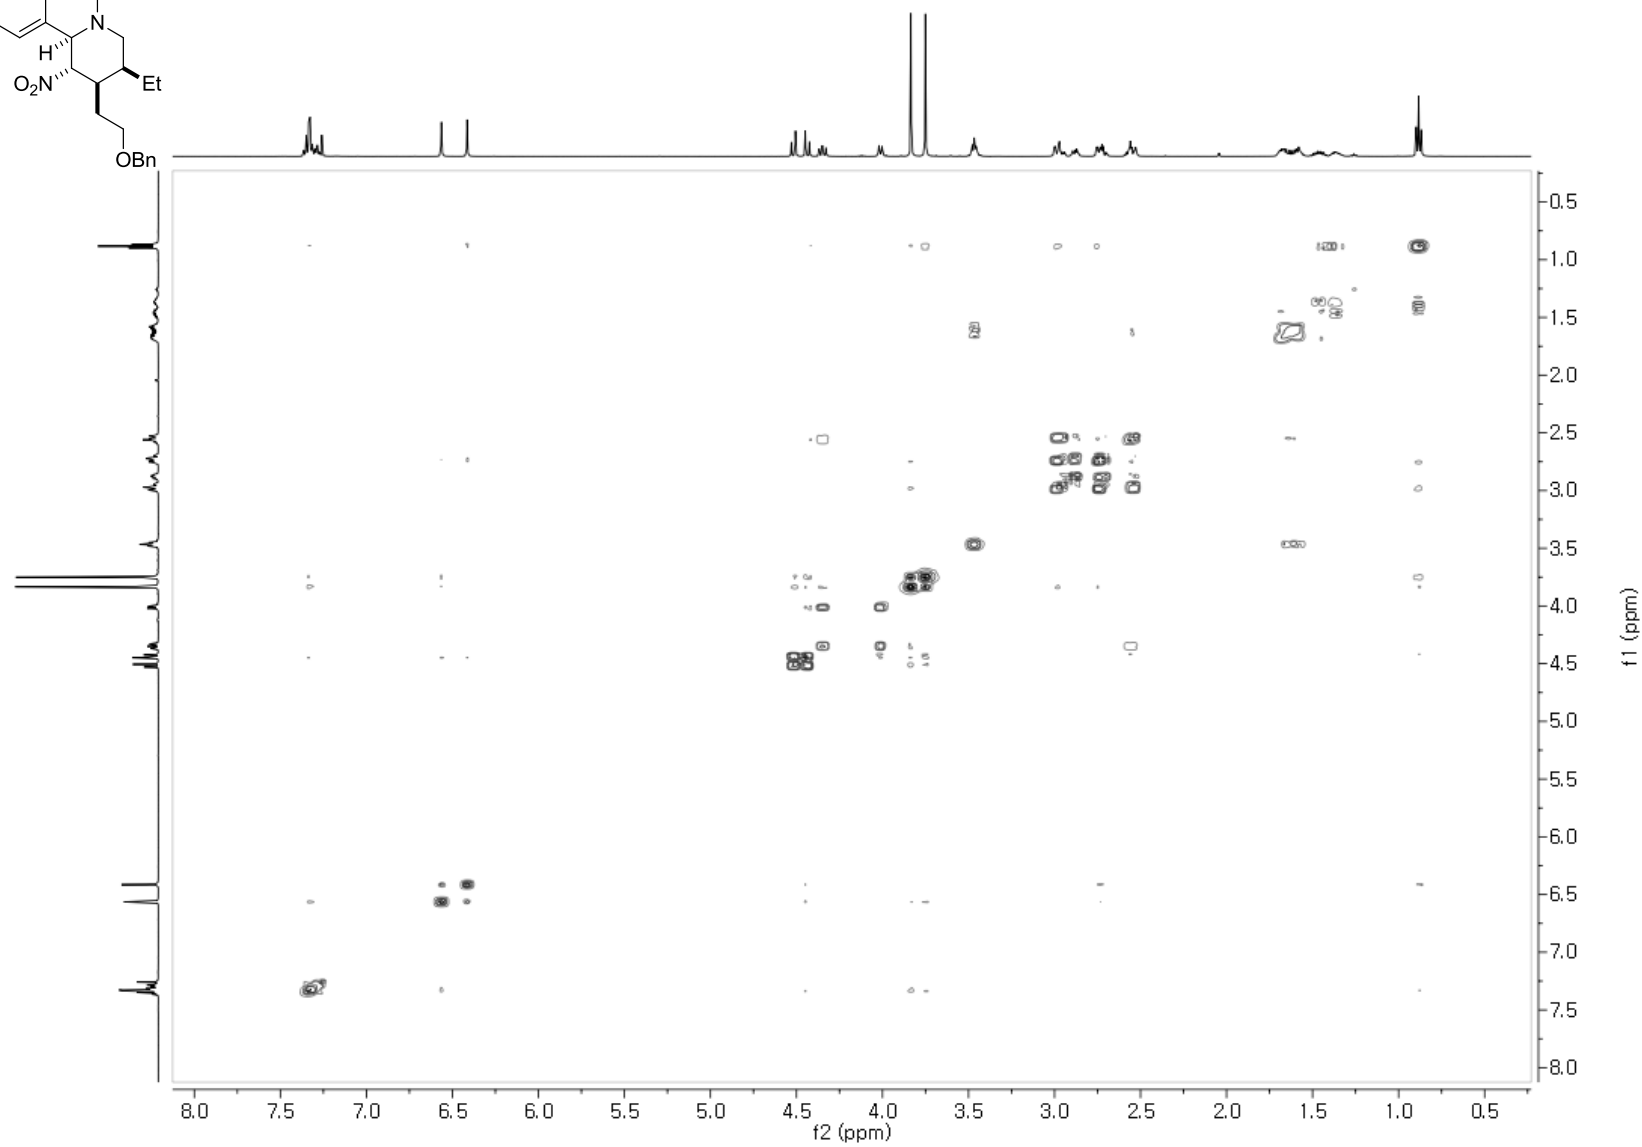

Noesy of **19'** in CDCl<sub>3</sub>

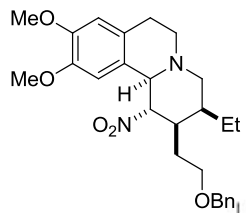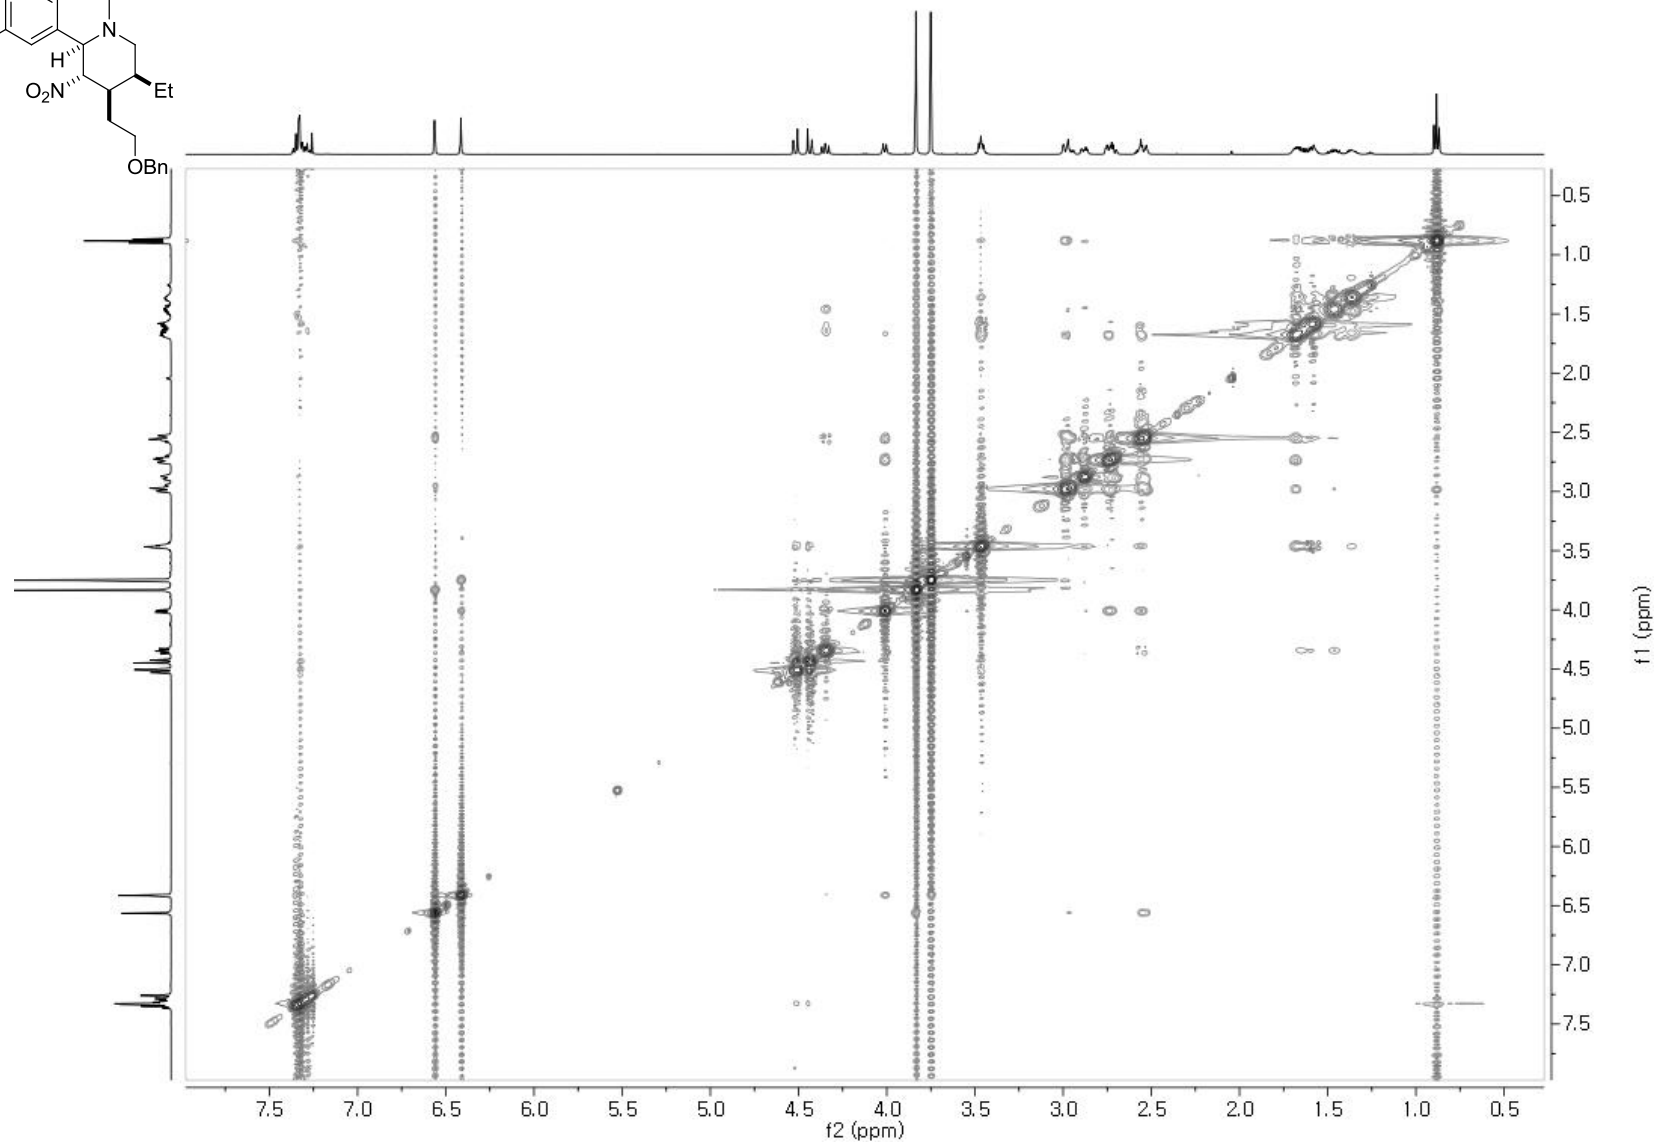

Gcosy of **19''** in CDCl<sub>3</sub>

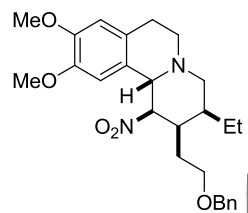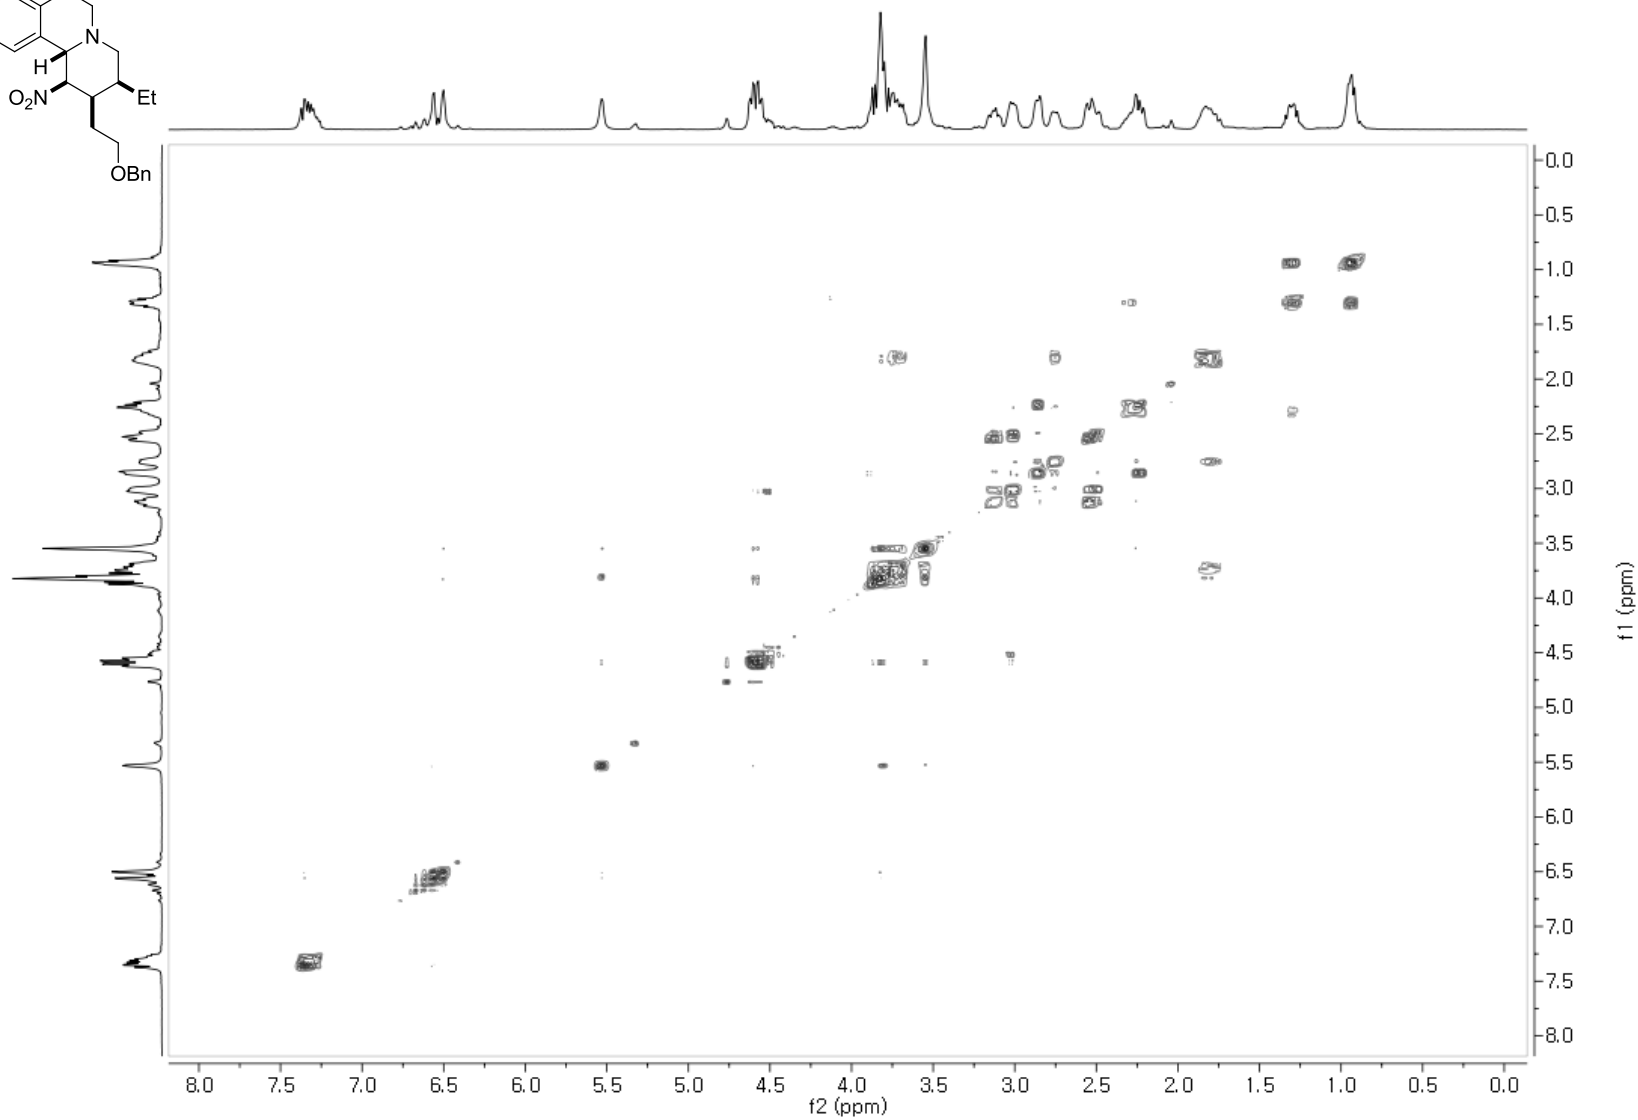



Noesy of **19''** in CDCl<sub>3</sub>

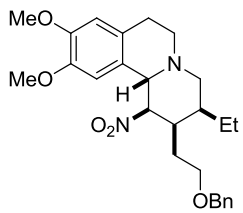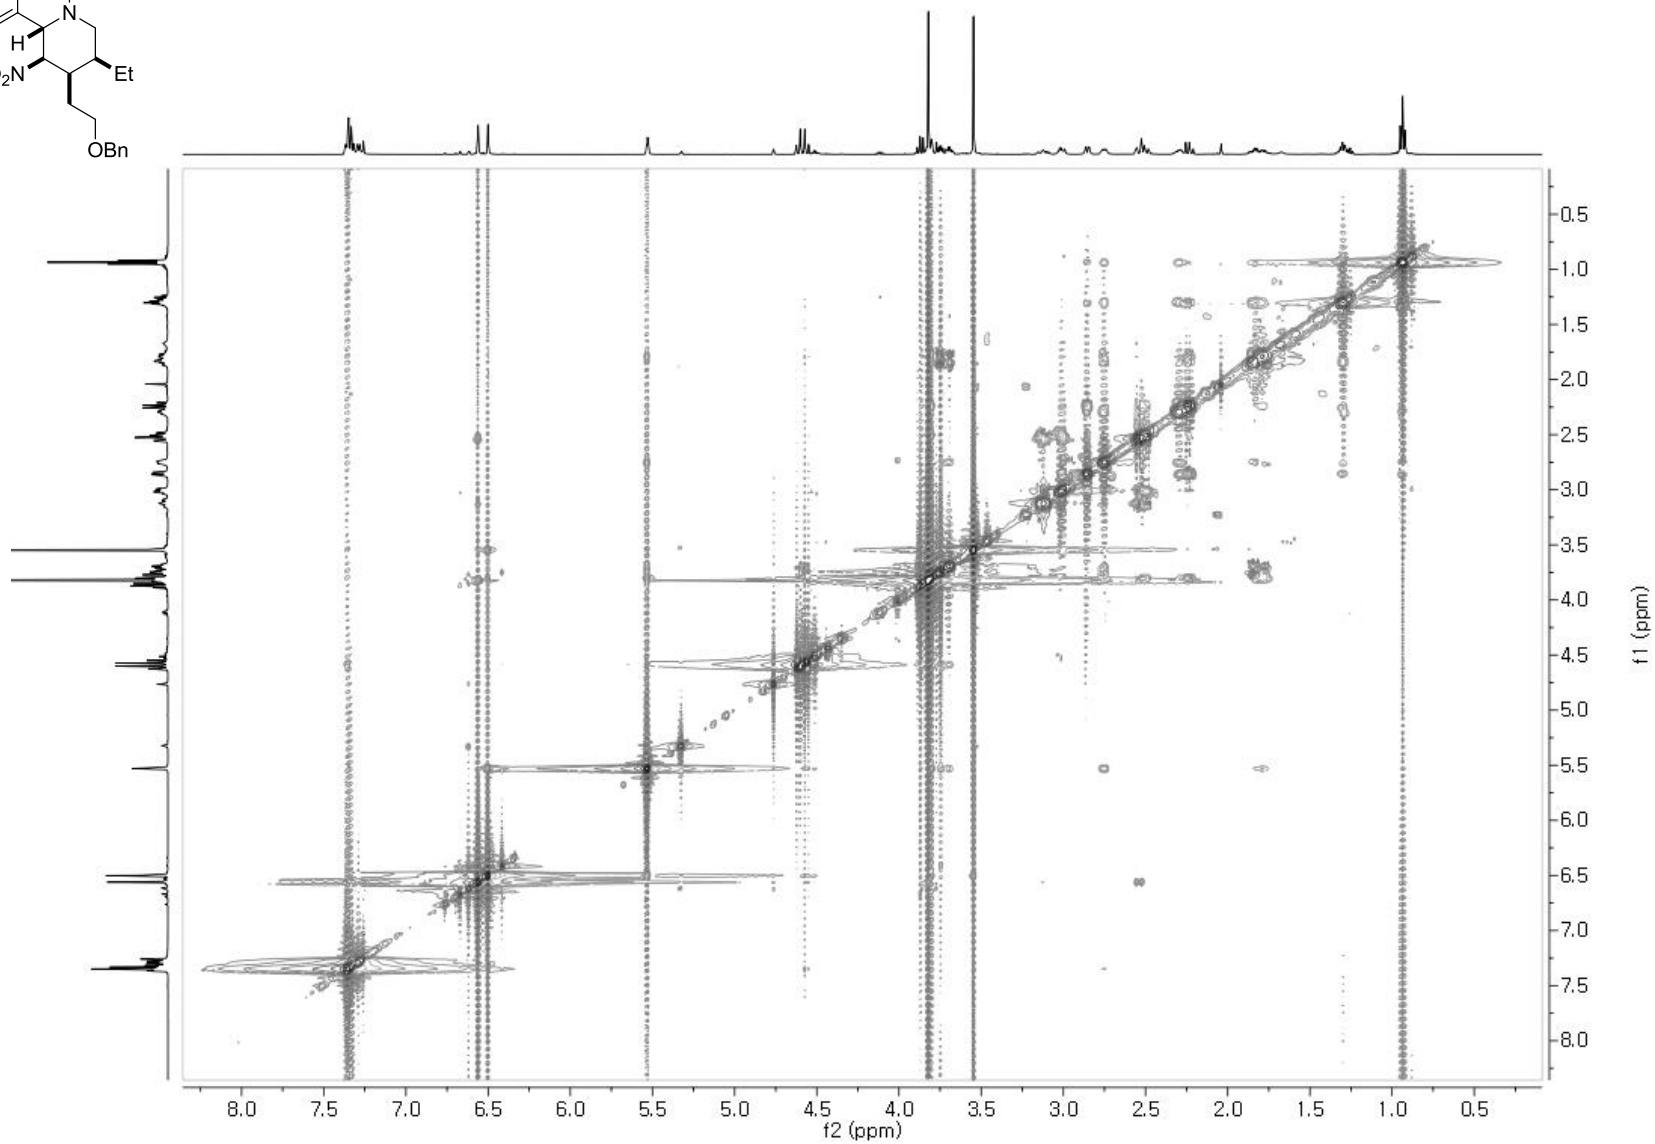

Supplement: jo5b01384_si_004.pdf [file jo5b01384_si_004.pdf]
